# Supplementary material for: Regiodivergent synthesis of pyrazino-indolines vs. triazocines via α-imino carbenes addition to imidazolidines
Source: PubMed Central journal article supplement — Chem Sci. 2020 Nov 23;12(4):1479–85. doi: 10.1039/d0sc05725h (PMC8179195; doi:10.1039/d0sc05725h), 2020-11-23
Supplement: SC-012-D0SC05725H-s001.pdf [file SC-012-D0SC05725H-s001.pdf]

## Regiodivergent Synthesis of Pyrazino-Indolines vs. Triazocines *via* $\alpha$ -Imino Carbenes Addition to Imidazolidines

Alejandro Guarnieri-Ibáñez,<sup>a</sup> Adiran de Aguirre,<sup>a</sup> Céline Besnard,<sup>b</sup> Amalia I. Poblador-Bahamonde <sup>\*a</sup> and Jérôme Lacour <sup>\*a</sup>

<sup>a</sup> *University of Geneva, Department of Organic Chemistry, Quai Ernest Ansermet 30, CH-1211 Geneva 4, Switzerland*

<sup>b</sup> *Laboratory of Crystallography, University of Geneva, quai Ernest Ansermet 24, CH-1211 Genève 4, Switzerland*

*amalia.pobladorbahamonde@unige.ch*  
*jerome.lacour@unige.ch*

Supporting Information

## Table of Contents

|                                                                                           |      |
|-------------------------------------------------------------------------------------------|------|
| 1. General remarks                                                                        | S3   |
| 2. Scheme S1. Initial experiment and X-ray structures                                     | S3   |
| 3. Optimization of the reaction conditions                                                | S4   |
| 4. General procedure I: synthesis of <i>N</i> -sulfonyl-1,2,3-triazoles                   | S5   |
| 5. General procedure II: synthesis of compounds <b>3</b> and <b>4</b>                     | S5   |
| Analysis data for compounds <b>3</b>                                                      | S5   |
| Analysis data for compounds <b>4</b>                                                      | S14  |
| 6. Synthesis of <b>3A</b>                                                                 | S15  |
| 7. Scheme S2. Mechanistic rationale for the formation of <b>5</b>                         | S16  |
| 8. General Procedure III: synthesis of tetrahydropyrazino[1,2- <i>a</i> ]indoles <b>5</b> | S16  |
| 9. Postfunctionalizations of <b>5aA</b> <i>via</i> oxidative C-C bond formation           | S19  |
| Synthesis of <b>6</b>                                                                     | S19  |
| Synthesis of <b>7</b>                                                                     | S19  |
| Synthesis of <b>8</b>                                                                     | S20  |
| 10. NMR spectra of new compounds                                                          | S21  |
| 11. Crystallographic data                                                                 | S55  |
| 12. Computational data                                                                    | S61  |
| 13. Computational details                                                                 | S74  |
| 14. XYZ Coordinates                                                                       | S75  |
| 15. References                                                                            | S178 |

## 1. General remarks

Unless otherwise stated, reagents were purchased from commercial sources and used without further purification. NMR spectra were recorded on 400 or 500 MHz spectrometer at 20 °C. <sup>1</sup>H-NMR: chemical shifts are given in ppm relative to Me<sub>4</sub>Si with solvent resonances used as internal standards (CDCl<sub>3</sub> δ = 7.26 ppm or CD<sub>2</sub>Cl<sub>2</sub> δ = 5.32 ppm). Data were reported as follows: chemical shift (δ) in ppm on the δ scale, multiplicity (s = singlet, d = doublet, t = triplet, dd = doublet of doublet, td = triplet of doublets, q = quartet and m = multiplet), coupling constant (Hz) and integration. <sup>13</sup>C-NMR: chemical shifts were given in ppm relative to Me<sub>4</sub>Si with solvent resonances used as internal standards (CDCl<sub>3</sub> δ = 77.16 ppm or CD<sub>2</sub>Cl<sub>2</sub> δ = 53.84 ppm). IR spectra were recorded using an ATR sampler and are reported in wave numbers (cm<sup>-1</sup>). Melting points (Mp) were measured in open capillary tubes and were uncorrected. Electrospray mass spectra (ESI) were obtained by the department of Mass Spectrometry of the University of Geneva. Flash column chromatography was performed with silica gel 40 - 63 μm or alumina (neutral Brockmann I, 50 - 200 μm). Imidazolidines were synthesized following reported procedures.<sup>1</sup>

## 2. Scheme S1. Initial experiment and X-ray structures

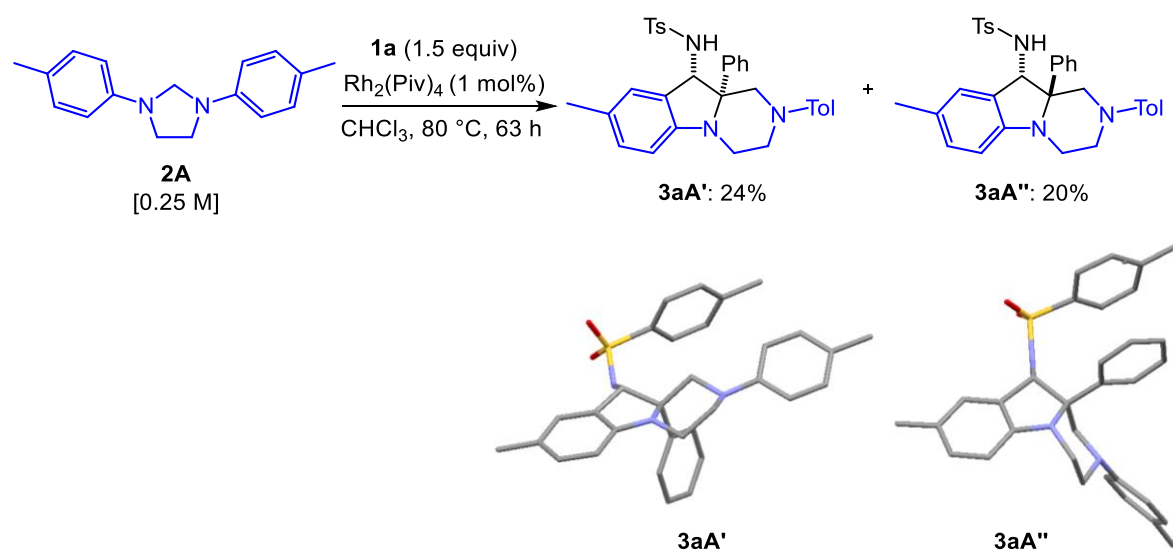

Top: reactivity of the *N*-tosyl-4-phenyl-1,2,3-triazole **1a** with imidazolidine **2A**.

Bottom: Stick views of the crystal structures of **3aA'** and **3aA''**. H-atoms are omitted for clarity.

### 3. Optimization of the reaction conditions

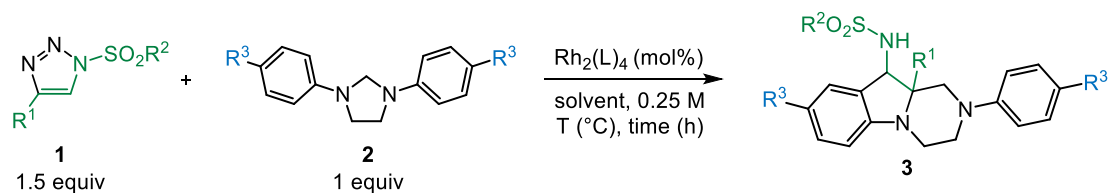

| Entry                 | Catalyst                        | Cat. Loading  | Solvent                      | T ( $^{\circ}C$ )                | Time        | Conversion <sup>a</sup> | Yield <sup>a</sup> | dr <sup>a</sup> |
|-----------------------|---------------------------------|---------------|------------------------------|----------------------------------|-------------|-------------------------|--------------------|-----------------|
| 1                     | -                               | -             | $CHCl_3$                     | 80 $^{\circ}C$                   | 40 h        | -                       | -                  | -               |
| 2                     | $Rh_2(Piv)_4$                   | 1 mol%        | $CHCl_3$                     | 80 $^{\circ}C$                   | 63 h        | 84%                     | 44%                | 1.2:1           |
| 3                     | $Rh_2(Piv)_4$                   | 2 mol%        | $CHCl_3$                     | 80 $^{\circ}C$                   | 63 h        | 95%                     | 53%                | 1.3:1           |
| 4                     | $Rh_2(Piv)_4$                   | 3 mol%        | $CHCl_3$                     | 80 $^{\circ}C$                   | 40 h        | >99%                    | 69%                | 1.6:1           |
| 5                     | $Rh_2(Piv)_4$                   | 5 mol%        | $CHCl_3$                     | 80 $^{\circ}C$                   | 40 h        | >99%                    | 76%                | 2.2:1           |
| 6                     | $Rh_2(esp)_2$                   | 3 mol%        | $CHCl_3$                     | 80 $^{\circ}C$                   | 40 h        | 97%                     | 68%                | 1.3:1           |
| 7                     | $Rh_2(S-TCPTTL)_4$              | 3 mol%        | $CHCl_3$                     | 80 $^{\circ}C$                   | 40 h        | >99%                    | 74%                | 1.2:1           |
| 8                     | $Rh_2(Oct)_4$                   | 3 mol%        | $CHCl_3$                     | 80 $^{\circ}C$                   | 40 h        | 80%                     | 28%                | 2.1:1           |
| 9                     | $Rh_2(R-DOSP)_4$                | 3 mol%        | $CHCl_3$                     | 80 $^{\circ}C$                   | 40 h        | 84%                     | 29%                | 1.9:1           |
| 10                    | $Rh_2(S-PTTL)_4$                | 3 mol%        | $CHCl_3$                     | 80 $^{\circ}C$                   | 40 h        | 51%                     | -                  | -               |
| 11                    | $Rh_2(TFA)_4$                   | 3 mol%        | $CHCl_3$                     | 80 $^{\circ}C$                   | 40 h        | 84%                     | -                  | -               |
| 12                    | $Rh_2(S-PTAD)_4$                | 3 mol%        | $CHCl_3$                     | 80 $^{\circ}C$                   | 40 h        | 70%                     | -                  | -               |
| 13                    | $Rh_2(Piv)_4$                   | 3 mol%        | $CH_2Cl_2$                   | 80 $^{\circ}C$                   | 40 h        | >99%                    | 80%                | 3.4:1           |
| 14                    | $Rh_2(Piv)_4$                   | 3 mol%        | Toluene                      | 80 $^{\circ}C$                   | 40 h        | >99%                    | 76%                | 2.8:1           |
| 15                    | $Rh_2(Piv)_4$                   | 3 mol%        | Chlorobenzene                | 80 $^{\circ}C$                   | 40 h        | >99%                    | 80%                | 2.5:1           |
| 16                    | $Rh_2(Piv)_4$                   | 3 mol%        | 1,2-DCE                      | 80 $^{\circ}C$                   | 40 h        | >99%                    | 78%                | 2.3:1           |
| 17                    | $Rh_2(Piv)_4$                   | 3 mol%        | <i>n</i> -Bu <sub>2</sub> O  | 80 $^{\circ}C$                   | 40 h        | 86%                     | 59%                | 2.7:1           |
| 18                    | $Rh_2(Piv)_4$                   | 3 mol%        | Toluene                      | 60 $^{\circ}C$                   | 40 h        | 97%                     | 75%                | 3.4:1           |
| 19                    | $Rh_2(Piv)_4$                   | 3 mol%        | Toluene                      | 100 $^{\circ}C$                  | 40 h        | >99%                    | 71%                | 2.6:1           |
| 20                    | $Rh_2(Piv)_4$                   | 3 mol%        | Toluene                      | 120 $^{\circ}C$                  | 40 h        | >99%                    | 66%                | 2.3:1           |
| 21                    | $Rh_2(Piv)_4$                   | 3 mol%        | $CH_2Cl_2$                   | 60 $^{\circ}C$                   | 40 h        | >99%                    | 78%                | 3.3:1           |
| 22                    | $Rh_2(Piv)_4$                   | 3 mol%        | $CH_2Cl_2$                   | 100 $^{\circ}C$                  | 40 h        | >99%                    | 77%                | 2.9:1           |
| <b>23<sup>b</sup></b> | <b><math>Rh_2(Piv)_4</math></b> | <b>3 mol%</b> | <b><math>CH_2Cl_2</math></b> | <b>80 <math>^{\circ}C</math></b> | <b>14 h</b> | <b>&gt;99%</b>          | <b>78%</b>         | <b>3.6:1</b>    |

(a) Determined by <sup>1</sup>H-NMR spectroscopy using 1,3,5-trimethoxybenzene as reference. (b) Optimized conditions.

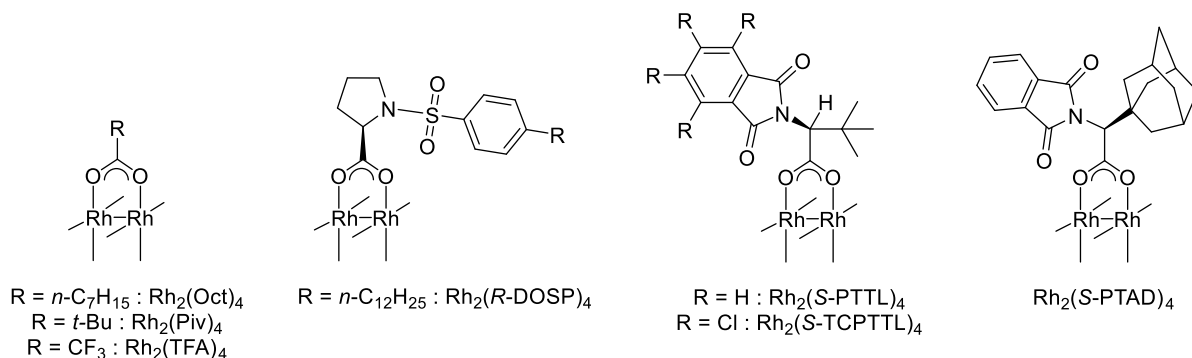



## 4. General procedure I: synthesis of *N*-sulfonyl-1,2,3-triazoles

**Important note:** Sulfonyl azides are potentially explosive materials and must be handled with caution.

**Azide synthesis:** Following the reported procedure,<sup>2</sup> to a stirred solution of sulfonyl chloride (1.0 equiv) in water/acetone mixture (1:2, 0.2 M), NaN<sub>3</sub> (1.3 equiv) was slowly added at 0 °C. The resulting solution was stirred at room temperature for 12 h. The residue was suspended in Et<sub>2</sub>O, the layers were separated and the aqueous phase was extracted three times with Et<sub>2</sub>O. The organic layers were combined, dried over MgSO<sub>4</sub>, filtered and concentrated under reduced pressure. The desired azide was obtained sufficiently pure to be used without any further purification.

**Caution:** Care should be taken to protect the reaction mixture from light at each step of the synthesis of the triazoles.

**Triazole synthesis:** Following the reported procedure,<sup>3</sup> 0.05 equiv of copper(I) thiophene-2-carboxylate (CuTC) and 1 equiv of the corresponding sulfonyl azide were diluted in toluene (0.2 M). Then 1.3 equiv of the corresponding alkyne was added and the solution was stirred at room temperature overnight and protected from light. The mixture was diluted with saturated NH<sub>4</sub>Cl<sub>aq</sub> and extracted three times with EtOAc. The combined organic layers were dried over MgSO<sub>4</sub> and concentrated under reduced pressure. The crude material was purified by column chromatography or by precipitations to afford the desired product. Products of type **1** were then stored at -20 °C.

## 5. General procedure II: synthesis of compounds **3** and **4**

In a 2 mL screw-cap vial equipped with a magnetic stirring bar, Rh<sub>2</sub>(Piv)<sub>4</sub> (3.66 mg, 0.006 mmol, 3 mol%), *N*-sulfonyl triazole **1** (0.3 mmol, 1.5 equiv) and the corresponding imidazolidine **2** (0.2 mmol, 1 equiv) were dissolved in 0.8 mL of anhydrous CH<sub>2</sub>Cl<sub>2</sub> (0.25 M). After 14 h stirring at 80 °C, the solution was concentrated under reduced pressure and the residue was purified by column chromatography.

### Analysis data for compounds **3**

#### Compound **3aA''** (minor dia):

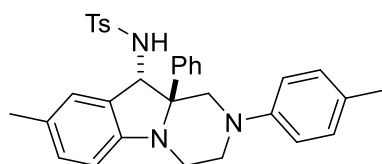

Following general procedure II, compound **3aA''** is obtained as a white solid (18 mg, 17% yield) starting from triazole **1a** and imidazolidine **2A** (50 mg, 0.2 mmol).

Purification: column chromatography (SiO<sub>2</sub>, pentane/EtOAc, 9:1).

**M.p.** = 201-203 °C; **R<sub>f</sub>** = 0.57 (SiO<sub>2</sub>, pentane/EtOAc, 8:2); **<sup>1</sup>H NMR (400 MHz, CDCl<sub>3</sub>)**: δ 7.56 (d, *J* = 8.4 Hz, 2H), 7.45-7.38 (m, 2H), 7.25-7.20 (m, 3H), 7.17 (d, *J* = 8.0 Hz, 2H), 7.05 (d, *J* = 8.2 Hz, 2H), 7.01-6.95 (m, 1H), 6.79 (d, *J* = 8.5 Hz, 2H), 6.47 (d, *J* = 8.0 Hz, 1H), 6.44 (s, 1H), 4.91 (d, *J* = 9.7 Hz, 1H), 4.78 (d, *J* = 9.7 Hz, 1H), 3.93 (d, *J* = 12.3 Hz, 1H), 3.62-3.52 (m, 1H), 3.31 (ddd, *J* = 14.0, 12.0, 3.8 Hz, 1H), 3.12-3.01 (m, 2H), 2.86 (td, *J* = 11.7, 3.5 Hz, 1H), 2.42 (s, 3H), 2.26 (s, 3H), 2.15 (s, 3H) ppm; **<sup>13</sup>C NMR (100 MHz, CDCl<sub>3</sub>)**: δ 149.8 (C), 147.2 (C), 143.7 (C), 142.2 (C), 137.6 (C), 130.4 (CH), 130.2 (C), 129.9 (2xCH), 129.8 (2xCH), 128.6 (2xCH), 128.0 (C), 127.3 (2xCH), 127.1 (CH), 127.0 (C), 126.9 (2xCH), 125.3 (CH), 117.3 (2xCH), 107.7 (CH), 72.9 (C), 67.1 (CH), 50.6 (CH<sub>2</sub>), 47.0 (CH<sub>2</sub>), 41.5 (CH<sub>2</sub>), 21.7 (CH<sub>3</sub>), 20.7 (CH<sub>3</sub>), 20.6 (CH<sub>3</sub>) ppm; **IR (neat)**: 3279, 2922, 2803, 1617, 1516, 1486, 1440, 1330, 1157, 1091, 808, 693, 659 cm<sup>-1</sup>; **HR-MS (ESI)**: *m/z* = 524.2371 [M+H]<sup>+</sup> (calculated for C<sub>32</sub>H<sub>34</sub>N<sub>3</sub>O<sub>2</sub>S *m/z* = 524.2366).

### Compound 3aA' (major dia):

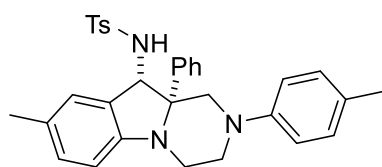

Following general procedure II, compound **3aA'** is obtained as a white solid (64 mg, 61% yield) starting from triazole **1a** and imidazolidine **2A** (50 mg, 0.2 mmol).

Purification: column chromatography (SiO<sub>2</sub>, pentane/EtOAc, 9:1).

**M.p.** = 178-180 °C; **Rf** = 0.50 (SiO<sub>2</sub>, pentane/EtOAc, 8:2); **<sup>1</sup>H NMR (400 MHz, CDCl<sub>3</sub>)**: δ 7.50 (d, *J* = 8.3 Hz, 1H), 7.34-7.22 (m, 7H), 7.06-6.98 (m, 3H), 6.72 (d, *J* = 4.5 Hz, 2H), 6.68 (s, 1H), 6.50 (d, *J* = 8.0 Hz, 1H), 4.60 (d, *J* = 9.6 Hz, 1H), 4.25 (d, *J* = 9.6 Hz, 1H), 3.92 (d, *J* = 12.3 Hz, 1H), 3.66-3.55 (m, 1H), 3.34 (ddd, *J* = 13.7, 12.0, 3.7 Hz, 1H), 3.16-3.06 (m, 1H), 2.91 (d, *J* = 12.4 Hz, 1H), 2.82 (td, *J* = 11.7, 3.4 Hz, 1H), 2.46 (s, 3H), 2.25 (s, 3H), 2.18 (s, 3H) ppm; **<sup>13</sup>C NMR (100 MHz, CDCl<sub>3</sub>)**: δ 149.7 (C), 147.6 (C), 143.4 (C), 138.5 (C), 137.1 (C), 130.5 (CH), 130.3 (C), 129.73 (2xCH), 129.72 (2xCH), 129.1 (2xCH), 127.9 (C), 127.8 (C), 127.8 (2xCH), 127.7 (CH), 127.2 (2xCH), 127.1 (CH), 117.5 (2xCH), 107.3 (CH), 72.0 (C), 62.2 (CH), 55.9 (CH<sub>2</sub>), 47.7 (CH<sub>2</sub>), 41.3 (CH<sub>2</sub>), 21.7 (CH<sub>3</sub>), 20.8 (CH<sub>3</sub>), 20.6 (CH<sub>3</sub>) ppm; **IR (neat)**: 3290, 2921, 1734, 1616, 1513, 1492, 1448, 1336, 1157, 1090, 1041, 909, 809, 701, 659 cm<sup>-1</sup>; **HR-MS (ESI)**: *m/z* = 524.2369 [M+H]<sup>+</sup> (calculated for C<sub>32</sub>H<sub>34</sub>N<sub>3</sub>O<sub>2</sub>S *m/z* = 524.2366).

### Compound 3bA'' (minor dia):

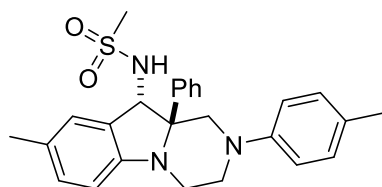

Following general procedure II, compound **3bA''** is obtained as a white solid (10 mg, 11% yield) starting from triazole **1a** and imidazolidine **2A** (50 mg, 0.2 mmol).

Purification: column chromatography (SiO<sub>2</sub>, pentane/EtOAc, 9:1).

**M.p.** = 98-100 °C; **Rf** = 0.43 (SiO<sub>2</sub>, pentane/EtOAc, 8:2); **<sup>1</sup>H NMR (400 MHz, CDCl<sub>3</sub>)**: δ 7.75-7.68 (m, 2H), 7.45-7.37 (m, 2H), 7.36-7.29 (m, 1H), 7.12-7.02 (m, 4H), 6.86 (d, *J* = 8.5 Hz, 2H), 6.54 (d, *J* = 8.4 Hz, 1H), 5.01 (d, *J* = 10.3 Hz, 1H), 4.66 (d, *J* = 10.1 Hz, 1H), 4.00 (d, *J* = 12.2 Hz, 1H), 3.62 (d, *J* = 13.2 Hz, 1H), 3.43-3.30 (m, 1H), 3.13-3.00 (m, 2H), 2.90 (td, *J* = 11.8, 3.3 Hz, 1H), 2.61 (s, 3H), 2.29 (s, 3H), 2.27 (s, 3H) ppm; **<sup>13</sup>C NMR (100 MHz, CDCl<sub>3</sub>)**: δ 149.8 (C), 146.9 (C), 142.1 (C), 130.7 (C), 130.6 (CH), 129.9 (2xCH), 129.0 (2xCH), 128.6 (C), 127.9 (CH), 127.21 (2xCH), 127.17 (C), 125.1 (CH), 117.8 (2xCH), 108.3 (CH), 73.4 (C), 67.9 (CH), 49.4 (CH<sub>2</sub>), 47.2 (CH<sub>2</sub>), 41.8 (CH<sub>3</sub>), 41.7 (CH<sub>2</sub>), 20.9 (CH<sub>3</sub>), 20.6 (CH<sub>3</sub>) ppm; **IR (neat)**: 3271, 2924, 1618, 1514, 1488, 1447, 1327, 1249, 1141, 1118, 975, 809, 702 cm<sup>-1</sup>; **HR-MS (ESI)**: *m/z* = 448.2048 [M+H]<sup>+</sup> (calculated for C<sub>26</sub>H<sub>30</sub>N<sub>3</sub>O<sub>2</sub>S *m/z* = 448.2053).

### Compound 3bA' (major dia):

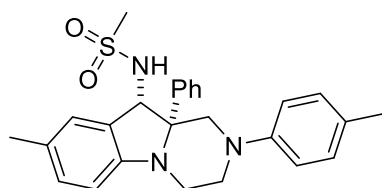

Following general procedure II, compound **3bA'** is obtained as a brownish solid (42 mg, 47% yield) starting from triazole **1b** and imidazolidine **2A** (50 mg, 0.2 mmol).

Purification: column chromatography (SiO<sub>2</sub>, pentane/EtOAc, 9:1).

**M.p.** = 93-95 °C; **Rf** = 0.34 (SiO<sub>2</sub>, pentane/EtOAc, 8:2); **<sup>1</sup>H NMR (400 MHz, CDCl<sub>3</sub>)**: δ 7.64-7.56 (m, 2H), 7.49-7.41 (m, 2H), 7.37-7.30 (m, 1H), 7.18 (s, 1H), 7.11-7.06 (m, 1H), 7.04 (d, *J* = 8.3 Hz, 1H), 6.80 (d, *J* = 8.5 Hz, 2H), 6.59 (d, *J* = 8.1 Hz, 1H), 4.67 (d, *J* = 8.7 Hz, 1H), 4.16-4.04 (m, 2H), 3.71-3.61 (m, 1H), 3.46-3.33 (m, 1H), 3.14-3.05 (m, 1H), 2.99 (d, *J* = 12.6 Hz, 1H), 2.85 (td, *J* = 11.9, 3.2 Hz, 1H), 2.29 (s, 3H), 2.25 (s, 3H), 2.24 (s, 3H) ppm; **<sup>13</sup>C NMR (100 MHz, CDCl<sub>3</sub>)**: δ 149.7 (C), 147.8 (C), 138.1 (C), 130.9 (CH), 130.5 (C), 129.8 (2xCH), 129.1 (2xCH), 128.7 (C), 128.39 (C), 128.35 (2xCH), 128.0 (CH), 127.3 (CH), 117.6 (2xCH), 108.8 (CH), 72.1 (C), 62.5 (CH), 54.1 (CH<sub>2</sub>), 47.3 (CH<sub>2</sub>), 41.9 (CH<sub>3</sub>), 41.6 (CH<sub>2</sub>), 20.8 (CH<sub>3</sub>), 20.6 (CH<sub>3</sub>) ppm; **IR (neat)**: 3272, 2926, 1617, 1513, 1492, 1448, 1323, 1149, 974, 909, 808, 702 cm<sup>-1</sup>; **HR-MS (ESI)**: *m/z* = 448.2061 [M+H]<sup>+</sup> (calculated for C<sub>26</sub>H<sub>30</sub>N<sub>3</sub>O<sub>2</sub>S *m/z* = 448.2053).

**Compound 3cA'' (minor dia):**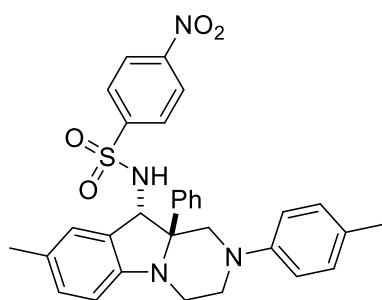

Following general procedure II, compound **3cA''** is obtained as a yellowish solid (9 mg, 8% yield) starting from triazole **1c** and imidazolidine **2A** (50 mg, 0.2 mmol).

Purification: column chromatography (SiO<sub>2</sub>, pentane/EtOAc, 9:1) followed by washing with pentane/Et<sub>2</sub>O.

**M.p.** = 190-192 °C; **Rf** = 0.61 (SiO<sub>2</sub>, pentane/EtOAc, 8:2); **<sup>1</sup>H NMR (400 MHz, CDCl<sub>3</sub>)**: δ 8.11 (d, *J* = 8.9 Hz, 2H), 7.74 (d, *J* = 8.8 Hz, 2H), 7.40-7.32 (m, 2H), 7.24-7.12 (m, 3H), 7.10-7.01 (m, 3H), 6.84-6.74 (m, 3H), 6.50 (d, *J* = 8.0 Hz, 1H), 5.04 (s, 2H), 3.77 (d, *J* = 12.0 Hz,

1H), 3.54 (d, *J* = 14.1 Hz, 1H), 3.27-3.16 (m, 1H), 3.09-2.97 (m, 2H), 2.86 (td, *J* = 11.8, 3.3 Hz, 1H), 2.27 (s, 3H), 2.24 (s, 3H) ppm; **<sup>13</sup>C NMR (100 MHz, CDCl<sub>3</sub>)**: δ 150.1 (C), 149.7 (C), 146.9 (C), 146.1 (C), 141.8 (C), 130.8 (CH), 129.9 (2xCH), 128.7 (2xCH), 128.6 (C), 128.3 (2xCH), 127.4 (CH), 127.0 (2xCH), 126.4 (C), 125.1 (CH), 124.4 (2xCH), 117.7 (2xCH), 108.3 (CH), 72.9 (C), 68.0 (CH), 49.4 (CH<sub>2</sub>), 47.2 (CH<sub>2</sub>), 41.5 (CH<sub>2</sub>), 20.9 (CH<sub>3</sub>), 20.6 (CH<sub>3</sub>) ppm; **IR (neat)**: 3252, 2803, 1611, 1528, 1488, 1443, 1338, 1309, 1159, 1091, 808, 736 cm<sup>-1</sup>; **HR-MS (ESI)**: *m/z* = 555.2061 [M+H]<sup>+</sup> (calculated for C<sub>31</sub>H<sub>31</sub>N<sub>4</sub>O<sub>4</sub>S *m/z* 555.2061).

**Compound 3cA' (major dia):**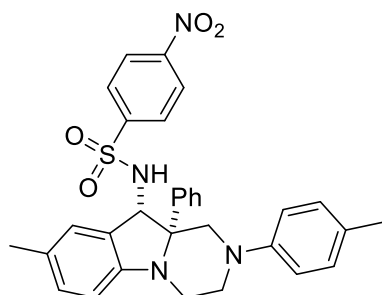

Following general procedure II, compound **3cA'** is obtained as an orange solid (60 mg, 55% yield) starting from triazole **1c** and imidazolidine **2A** (50 mg, 0.2 mmol).

Purification: column chromatography (SiO<sub>2</sub>, pentane/EtOAc, 9:1) followed by washing with pentane/Et<sub>2</sub>O.

**M.p.** = 103-105 °C; **Rf** = 0.50 (SiO<sub>2</sub>, pentane/EtOAc, 8:2); **<sup>1</sup>H NMR (400 MHz, CDCl<sub>3</sub>)**: δ 8.19 (d, *J* = 8.6 Hz, 2H), 7.65-7.57 (m, 2H), 7.40-7.26 (m, 5H), 7.06 (d, *J* = 8.0 Hz, 1H), 7.02 (d, *J* = 8.2 Hz, 2H), 6.95 (s, 1H), 6.73 (d, *J* = 8.2 Hz, 2H), 6.57 (d, *J* = 8.0 Hz, 1H), 4.57 (d, *J* = 9.5

Hz, 1H), 4.53 (d, *J* = 9.5 Hz, 1H), 3.89 (d, *J* = 12.4 Hz, 1H), 3.63 (d, *J* = 14.0 Hz, 1H), 3.42-3.28 (m, 1H), 3.05 (d, *J* = 10.3 Hz, 1H), 2.96 (d, *J* = 12.4 Hz, 1H), 2.82 (td, *J* = 11.8, 3.2 Hz, 1H), 2.24 (s, 3H), 2.23 (s, 3H) ppm; **<sup>13</sup>C NMR (100 MHz, CDCl<sub>3</sub>)**: δ 149.8 (C), 149.5 (C), 147.7 (C), 147.1 (C), 137.2 (C), 131.1 (CH), 130.7 (C), 129.8 (2xCH), 129.2 (2xCH), 128.6 (C), 128.0 (2xCH), 127.9 (CH), 127.7 (C), 127.6 (2xCH), 127.2 (CH), 124.2 (2xCH), 117.7 (2xCH), 108.7 (CH), 72.1 (C), 62.4 (CH), 54.8 (CH<sub>2</sub>), 47.3 (CH<sub>2</sub>), 41.6 (CH<sub>2</sub>), 20.8 (CH<sub>3</sub>), 20.6 (CH<sub>3</sub>) ppm; **IR (neat)**: 3290, 2922, 1615, 1526, 1492, 1346, 1309, 1161, 909, 809, 733 cm<sup>-1</sup>; **HR-MS (ESI)**: *m/z* = 555.2060 [M+H]<sup>+</sup> (calculated for C<sub>31</sub>H<sub>31</sub>N<sub>4</sub>O<sub>4</sub>S *m/z* = 555.2061).

### Compound 3dA (both dia):

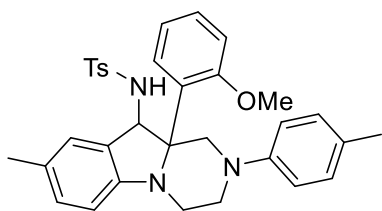

Following general procedure II, compound **3dA** is obtained as a brownish solid (65 mg, 58% yield) starting from triazole **1d** and imidazolidine **2A** (51 mg, 0.2 mmol).

Purification: column chromatography (SiO<sub>2</sub>, pentane/EtOAc, 8:2).

**M.p.** = 157-159 °C; **Rf** = 0.35 (SiO<sub>2</sub>, pentane/EtOAc, 8:2); **<sup>1</sup>H NMR** (400 MHz, CDCl<sub>3</sub>, inseparable mixture of diastereoisomers (dr 1:1)):

δ [7.64 (*dia A*) and 7.45 (*dia B*) (d, *J* = 8.0 Hz, 2H)], 7.61-7.53 (*dia B*, m, 1H), 7.32-7.27 (*dia B*, m, 1H), 7.24-7.12 (m, 6H, aromatics), 7.05-6.92 (m, 7H, aromatics), 6.88 (*dia A*, dd, *J* = 8.3, 1.2 Hz, 1H), 6.83 (*dia B*, d, *J* = 8.1 Hz, 1H), 6.80-6.72 (*dia A*, m, 3H), 6.67-6.48 (*dia B*, m, 4H), 6.45 (*dia A*, d, *J* = 8.0 Hz, 1H), 6.21 (*dia A*, s, 1H), [5.14 (*dia A*) and 4.84 (*dia B*) (d, *J* = 9.1 Hz, 1H)], 4.80-4.68 (*dia A* and *dia B*, m, 2H), 4.30 (*dia A*, d, *J* = 12.8 Hz, 1H), 4.14 (*dia B*, s, 1H), [3.84 (*dia A*) and 3.69 (*dia B*), s, 3H)], 3.74-3.58 (*dia A* and *dia B*, m, 3H), 3.48-3.36 (*dia A*, m, 2H), 3.21-3.16 (*dia A*, m, 1H), 3.06 (*dia B*, d, *J* = 11.3 Hz, 1H), 2.98 (*dia A*, td, *J* = 11.4, 4.3 Hz, 1H), 2.85-2.72 (*dia B*, m, 2H), [2.42 (*dia B*) and 2.41 (*dia A*) (s, 3H)], [2.25 (*dia A*) and 2.20 (*dia B*) (s, 3H)], [2.10 (*dia B*) and 2.07 (*dia A*) (s, 3H)] ppm; **<sup>13</sup>C NMR** (100 MHz, CDCl<sub>3</sub>): inseparable mixture of diastereoisomers (dr 1:1): δ [158.2 (*dia A*) and 157.3 (*dia B*) (C)], [149.9 (*dia B*) and 149.4 (*dia A*) (C)], [147.34 (*dia B*) and 147.29 (*dia A*) (C)], [143.34 (*dia A*) and 142.8 (*dia B*) (C)], [139.6 (*dia B*) and 138.5 (*dia A*) (C)], [130.3 (*dia B*) and [130.1 (*dia A*) (CH)], 129.8 (*dia B*, CH), [129.71 (*dia A*) and 129.52 (*dia B*) (2xCH)], [129.7 (*dia A*) and 129.47 (*dia B*) 2xCH], 129.56 (*dia A*, CH), 129.4 (*dia B*, CH), [129.19 (*dia A*) and 129.11 (*dia B*) (C)], [129.16 (*dia A*) and 129.07 (*dia B*) (C)], 128.7 (*dia A*, CH), 128.0 (*dia A*, C), 127.6 (*dia B*, CH), [127.3 (*dia A*) and 127.07 (*dia B*) (2xCH)], [127.11 (*dia A*) and 127.0 (*dia B*) (C)], 126.0 (*dia A*; CH), [120.9 (*dia B*) and 120.4 (*dia A*) (CH)], [116.9 (*dia B*) and 116.6 (*dia A*) (2xCH)], [112.0 (*dia A*) and 111.6 (*dia B*) (CH)], [109.0 (*dia B*) and 106.7 (*dia A*) (CH)], [73.3 (*dia B*) and 71.7 (*dia A*) (C)], [63.5 (*dia A*) and 59.8 (*dia B*) (CH)], [55.5 (*dia A*) and 55.0 (*dia B*) (CH<sub>3</sub>)], [54.4 (*dia B*) and 51.6 (*dia A*) (CH<sub>2</sub>)], [47.1 (*dia A*) and 46.1 (*dia B*) (CH<sub>2</sub>)], [42.6 (*dia B*) and 41.2 (*dia A*) (CH<sub>2</sub>)], [21.63 (*dia A*) and 21.60 (*dia B*) (CH<sub>3</sub>)], [20.69 (*dia A*) and 20.69 (*dia B*) (CH<sub>3</sub>)], [20.6 (*dia B*) and 20.5 (*dia A*) (CH<sub>3</sub>)] ppm;

**IR** (neat): 2938, 1617, 1600, 1490, 1450, 1431, 1329, 1234, 1161, 1055, 1030, 909, 815, 755 cm<sup>-1</sup>;

**HR-MS** (ESI): *m/z* = 554.2457 [M+H]<sup>+</sup> (calculated for C<sub>33</sub>H<sub>36</sub>N<sub>3</sub>O<sub>3</sub>S *m/z* = 554.2472).

### Compound 3eA'' (minor dia):

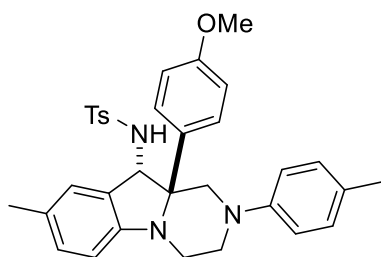

Following general procedure II, compound **3eA''** is obtained as a brownish solid (19 mg, 17% yield) starting from triazole **1e** and imidazolidine **2A** (50 mg, 0.2 mmol).

Purification: column chromatography (SiO<sub>2</sub>, pentane/EtOAc, 8:2).

**M.p.** = 170-172 °C; **Rf** = 0.47 (SiO<sub>2</sub>, pentane/EtOAc, 8:2); **<sup>1</sup>H NMR** (400 MHz, CDCl<sub>3</sub>):

δ 7.56 (d, *J* = 8.3 Hz, 2H), 7.33 (d, *J* = 8.8 Hz, 2H), 7.17 (d, *J* = 8.0 Hz, 2H), 7.05 (d, *J* = 8.2 Hz, 2H), 6.98 (d, *J* = 8.0 Hz, 1H), 6.79 (d, *J* = 8.5 Hz, 2H), 6.76 (d, *J* = 8.8 Hz, 2H), 6.49-6.42 (m,

2H), 4.90 (d, *J* = 9.6 Hz, 1H), 4.78 (d, *J* = 9.7 Hz, 1H), 3.88 (d, *J* = 12.2 Hz, 1H), 3.80 (s, 3H), 3.59-3.49 (m, 1H), 3.34-3.23 (m, 1H), 3.10-2.99 (m, 2H), 2.84 (td, *J* = 11.7, 3.4 Hz, 1H), 2.42 (s, 3H), 2.26 (s, 3H), 2.16 (s, 3H) ppm; **<sup>13</sup>C NMR** (100 MHz, CDCl<sub>3</sub>): δ 158.7 (C), 149.8 (C), 147.0 (C), 143.7 (C), 137.4 (C), 133.8 (C), 130.4 (CH), 130.2 (C), 129.82 (2xCH), 129.76 (2xCH), 128.05 (2xCH), 127.99 (C), 127.2 (2xCH), 127.1 (C), 125.2 (CH), 117.4 (2xCH), 113.9 (2xCH), 107.8 (CH), 72.6 (C), 67.1 (CH), 55.3 (CH<sub>3</sub>), 50.2 (CH<sub>2</sub>), 47.0 (CH<sub>2</sub>), 41.4 (CH<sub>2</sub>), 21.7 (CH<sub>3</sub>), 20.8 (CH<sub>3</sub>), 20.6 (CH<sub>3</sub>) ppm; **IR** (neat): 3261, 2925, 1613, 1513, 1486, 1443, 1330, 1249, 1154, 1091, 1043, 807, 658 cm<sup>-1</sup>; **HR-MS** (ESI): *m/z* = 554.2471 [M+H]<sup>+</sup> (calculated for C<sub>33</sub>H<sub>36</sub>N<sub>3</sub>O<sub>3</sub>S *m/z* = 554.2472).

### Compound 3eA' (major dia):

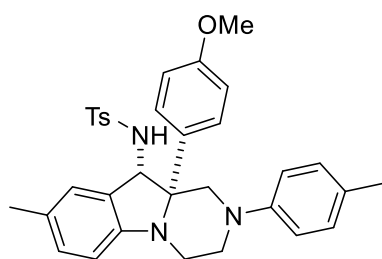

Following general procedure II, compound **3eA'** is obtained as a brownish solid (79 mg, 71% yield) starting from triazole **1e** and imidazolidine **2A** (50 mg, 0.2 mmol). Purification: column chromatography (SiO<sub>2</sub>, pentane/EtOAc, 8:2). **M.p.** = 102-104 °C; **Rf** = 0.32 (SiO<sub>2</sub>, pentane/EtOAc, 8:2); **<sup>1</sup>H NMR (400 MHz, CDCl<sub>3</sub>):** δ 7.52 (d, *J* = 8.3 Hz, 2H), 7.26-7.22 (m, 2H), 7.15 (d, *J* = 8.3 Hz, 2H), 7.07-6.96 (m, 3H), 6.80 (d, *J* = 9.1 Hz, 2H), 6.76-6.67 (m, 3H), 6.48 (d, *J* = 8.0 Hz, 1H), 4.57 (d, *J* = 9.4 Hz, 1H), 4.29 (d, *J* = 9.4 Hz, 1H), 3.86 (d, *J* = 12.4 Hz, 1H), 3.80 (s, 3H), 3.64-3.53 (m, 1H), 3.38-3.25 (m, 1H), 3.15-3.07 (m, 1H), 2.88 (d, *J* = 12.3 Hz, 1H), 2.80 (td, *J* = 11.7, 3.4 Hz, 1H), 2.46 (s, 3H), 2.25 (s, 3H), 2.18 (s, 3H) ppm; **<sup>13</sup>C NMR (100 MHz, CDCl<sub>3</sub>):** δ 158.9 (C), 149.6 (C), 147.5 (C), 143.4 (C), 138.3 (C), 130.4 (CH), 130.3 (C), 129.69 (4xCH), 128.9 (2xCH), 128.6 (C), 127.9 (C), 127.8 (C), 127.2 (2xCH), 127.1 (CH), 117.5 (2xCH), 114.4 (2xCH), 107.2 (CH), 71.6 (C), 62.1 (CH), 55.8 (CH<sub>2</sub>), 55.3 (CH<sub>3</sub>), 47.7 (CH<sub>2</sub>), 41.1 (CH<sub>2</sub>), 21.7 (CH<sub>3</sub>), 20.8 (CH<sub>3</sub>), 20.6 (CH<sub>3</sub>) ppm; **IR (neat):** 3289, 2923, 1614, 1512, 1493, 1444, 1335, 1247, 1157, 1093, 1031, 909, 809, 658 cm<sup>-1</sup>; **HR-MS (ESI):** *m/z* = 554.2473 [M+H]<sup>+</sup> (calculated for C<sub>33</sub>H<sub>36</sub>N<sub>3</sub>O<sub>3</sub>S *m/z* = 554.2472).

### Compound 3fA (both dia):

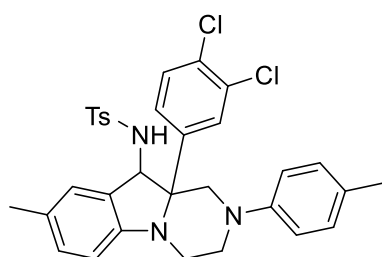

Following general procedure II, compound **3fA** is obtained as a brownish solid (79 mg, 67% yield) starting from triazole **1f** and imidazolidine **2A** (50 mg, 0.2 mmol). Purification: column chromatography (SiO<sub>2</sub>, pentane/EtOAc, 8.5:1.5). **M.p.** = 180-182 °C; **Rf** = 0.36 (SiO<sub>2</sub>, pentane/EtOAc, 8.5:1.5); **<sup>1</sup>H NMR (400 MHz, CDCl<sub>3</sub>, inseparable mixture of diastereoisomers (dr 1:3.2):** δ [7.54 (minor) and 7.44 (major) (d, *J* = 8.3 Hz, 2H)], 7.50 (minor, s, 1H), 7.40-7.34 (m, 1H, aromatics), 7.28-7.22 (m, 3.3H, aromatics), 7.19 (minor, d, *J* = 8.1 Hz, 2H), 7.16-7.09 (m, 1H, aromatics), 7.08-7.00 (m, 4H, aromatics), 6.78 (minor, d, *J* = 8.5 Hz, 2H), 6.75-6.69 (m, 3H, aromatics), 6.64-6.61 (minor, m, 1H), [6.54 (major) and 6.48 (minor) (d, *J* = 8.1 Hz, 1H)], 4.87 (minor, s, 2H), 4.58 (major, d, *J* = 9.7 Hz, 1H), 4.34 (major, d, *J* = 9.7 Hz, 1H), 3.83-3.72 (major and minor, m, 1H), [3.66-3.58 (major) and 3.58-3.51 (minor) (m, 1H)], [3.34-3.23 (major) and 3.22-3.16 (minor) (m, 1H)], 3.11-2.99 (m, 1.6H), 2.91 (major, d, *J* = 12.6 Hz, 1H), 2.88-2.74 (m, 1H), [2.47 (major) and 2.45 (minor) (s, 3H)], [2.27 (minor) and 2.25 (major) (s, 3H)], 2.2 (major and minor, s, 3H) ppm; **<sup>13</sup>C NMR (100 MHz, CDCl<sub>3</sub>, inseparable mixture of diastereoisomers (dr 1:3.2):** δ [149.6 (minor) and 149.4 (major) (C)], [147.3 (major) and 146.6 (minor) (C)], [144.3 (minor) and 143.7 (major) (C)], [142.7 (minor) and 138.32 (major) (C)], [138.28 (major) and 137.0 (minor) (C)], [132.9 (major) and 132.6 (minor) (C)], [131.6 (major) and 131.3 (minor) (C)], [130.9 (major) and 130.47 (minor) (CH)], [130.9 (major) (C)], [130.6 (major) and 130.1 (minor) (CH)], [130.6 (major) and 129.2 (minor) (CH)], [129.91 (minor) and 129.84 (major) (2xCH)], [129.86 (minor) and 129.76 (major) (2xCH)], [128.9 (major) and 128.8 (minor) (C)], [127.8 (major) (C)], [127.4 (major) and 126.6 (minor) (CH)], [127.2 (major) and 125.3 (minor) (CH)], [127.1 (minor) and 126.8 (major) (2xCH)], [117.80 (major) and 117.78 (minor) (2xCH)], [108.4 (major) and 108.2 (minor) (CH)], [72.7 (minor) and 71.5 (major) (C)], [67.0 (minor) and 62.2 (major) (CH)], [55.0 (major) and 49.7 (minor) (CH<sub>2</sub>)], [47.7 (major) and 47.3 (minor) (CH<sub>2</sub>)], [41.6 (minor) and 41.5 (major) (CH<sub>2</sub>)], [21.78 (minor) and 21.76 (major) (CH<sub>3</sub>)], [20.78 (minor) and 20.75 (major) (CH<sub>3</sub>)], [20.64 (minor) and 20.62 (major) (CH<sub>3</sub>)] ppm; **IR (neat):** 3266, 2918, 1618, 1517, 1494, 1446, 1338, 1207, 1158, 1092, 909, 808, 794, 658 cm<sup>-1</sup>; **HR-MS (ESI):** *m/z* = 592.1602 [M+H]<sup>+</sup> (calculated for C<sub>32</sub>H<sub>32</sub>Cl<sub>2</sub>N<sub>3</sub>O<sub>2</sub>S *m/z* = 592.1587).

### Compound 3gA'' (minor dia):

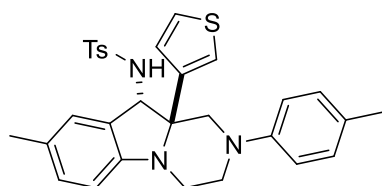

Following general procedure II, compound **3gA''** is obtained as a white solid (15 mg, 14% yield) starting from triazole **1g** and imidazolidine **2A** (50 mg, 0.2 mmol).

Purification: column chromatography (SiO<sub>2</sub>, pentane/EtOAc, 8:2).

**M.p.** = 194-196°C; **Rf** = 0.53 (SiO<sub>2</sub>, pentane/EtOAc, 8:2); **<sup>1</sup>H NMR (400 MHz, CDCl<sub>3</sub>)**: δ 7.59 (d, *J* = 8.0 Hz, 2H), 7.24-7.17 (m, 3H), 7.14-7.01 (m, 4H), 6.98 (d, *J* = 8.1 Hz, 1H), 6.76 (d, *J* = 8.1 Hz, 2H), 6.53 (s, 1H), 6.44 (d, *J* = 7.9 Hz, 1H), 4.99 (d, *J* = 9.5 Hz, 1H), 4.77 (d, *J* = 9.6 Hz, 1H), 3.74 (d, *J* = 12.1 Hz, 1H), 3.54 (d, *J* = 14.4 Hz, 1H), 3.37-3.24 (m, 1H), 3.08 (d, *J* = 11.0 Hz, 1H), 3.03 (d, *J* = 12.1 Hz, 1H), 2.82 (td, *J* = 11.8, 3.3 Hz, 1H), 2.43 (s, 3H), 2.27 (s, 3H), 2.17 (s, 3H) ppm; **<sup>13</sup>C NMR (100 MHz, CDCl<sub>3</sub>)**: δ 149.7 (C), 146.8 (C), 143.7 (C), 143.6 (C), 137.6 (C), 130.4 (CH), 130.1 (C), 129.9 (2xCH), 129.8 (2xCH), 128.2 (C), 127.3 (C), 127.2 (2xCH), 126.7 (CH), 125.7 (CH), 125.3 (2xCH), 123.0 (2xCH), 117.2 (2xCH), 107.8 (CH), 71.0 (C), 66.2 (CH), 51.2 (CH<sub>2</sub>), 46.8 (CH<sub>2</sub>), 41.6 (CH<sub>2</sub>), 21.7 (CH<sub>3</sub>), 20.8 (CH<sub>3</sub>), 20.6 (CH<sub>3</sub>) ppm; **IR (neat)**: 3271, 2920, 1618, 1514, 1490, 1441, 1330, 1158, 1092, 909, 809, 664 cm<sup>-1</sup>; **HR-MS (ESI)**: *m/z* = 530.1937 [M+H]<sup>+</sup> (calculated for C<sub>30</sub>H<sub>32</sub>N<sub>3</sub>O<sub>2</sub>S<sub>2</sub> *m/z* = 530.1931).

### Compound 3gA' (major dia):

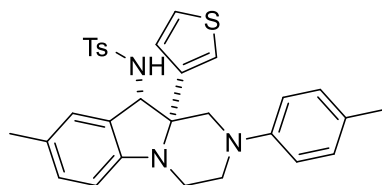

Following general procedure II, compound **3gA'** is obtained as a white solid (72 mg, 68% yield) starting from triazole **1g** and imidazolidine **2A** (50 mg, 0.2 mmol).

Purification: column chromatography (SiO<sub>2</sub>, pentane/EtOAc, 8:2).

**M.p.** = 207-209 °C; **Rf** = 0.46 (SiO<sub>2</sub>, pentane/EtOAc, 8:2); **<sup>1</sup>H NMR (400 MHz, CDCl<sub>3</sub>)**: δ 7.63 (d, *J* = 8.2 Hz, 2H), 7.31 (d, *J* = 8.0 Hz, 2H), 7.25-7.23 (m, 1H), 7.08-6.94 (m, 4H), 6.80 (d, *J* = 5.0 Hz, 1H), 6.74-6.64 (m, 3H), 6.43 (d, *J* = 8.0 Hz, 1H), 4.66 (d, *J* = 9.7 Hz, 1H), 4.37 (d, *J* = 9.7 Hz, 1H), 3.75 (d, *J* = 12.0 Hz, 1H), 3.59-3.50 (m, 1H), 3.28 (td, *J* = 12.5, 3.5 Hz, 1H), 3.23-3.16 (m, 1H), 2.88 (d, *J* = 12.0 Hz, 1H), 2.80 (td, *J* = 11.6, 3.5 Hz, 1H), 2.47 (s, 3H), 2.26 (s, 3H), 2.18 (s, 3H) ppm; **<sup>13</sup>C NMR (100 MHz, CDCl<sub>3</sub>)**: δ 149.5 (C), 147.2 (C), 143.6 (C), 139.1 (C), 138.5 (C), 130.3 (CH), 130.1 (C), 129.83 (2xCH), 129.76 (2xCH), 127.93 (C), 127.86 (C), 127.32 (2xCH), 127.28 (CH), 126.7 (CH), 126.5 (CH), 123.9 (CH), 117.3 (2xCH), 106.6 (CH), 70.9 (C), 62.2 (CH), 57.0 (CH<sub>2</sub>), 48.0 (CH<sub>2</sub>), 41.0 (CH<sub>2</sub>), 21.7 (CH<sub>3</sub>), 20.8 (CH<sub>3</sub>), 20.6 (CH<sub>3</sub>) ppm; **IR (neat)**: 3371, 2841, 1614, 1513, 1492, 1340, 1160, 911, 816, 722 cm<sup>-1</sup>; **HR-MS (ESI)**: *m/z* = 530.1918 [M+H]<sup>+</sup> (calculated for C<sub>30</sub>H<sub>32</sub>N<sub>3</sub>O<sub>2</sub>S<sub>2</sub> *m/z* = 530.1931).

### Compound 3hA'' (minor dia):

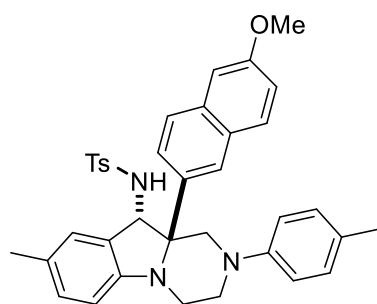

Following general procedure II, compound **3hA''** is obtained as a brownish solid (19 mg, 16% yield) starting from triazole **1h** and imidazolidine **2A** (51 mg, 0.2 mmol).

Purification: column chromatography (SiO<sub>2</sub>, pentane/EtOAc, 8:2).

**M.p.** = 166-168 °C; **Rf** = 0.36 (SiO<sub>2</sub>, pentane/EtOAc, 8:2); **<sup>1</sup>H NMR (500 MHz, CDCl<sub>3</sub>)**: δ 7.66-7.63 (m, 1H), 7.63-7.58 (m, 2H), 7.56-7.52 (m, 1H), 7.41 (d, *J* = 8.3 Hz, 2H), 7.14-7.09 (m, 2H), 7.07 (d, *J* = 8.2 Hz, 2H), 7.04-7.00 (m, 1H), 6.86 (d, *J* = 8.0 Hz, 2H), 6.82 (d, *J* = 8.5 Hz, 2H), 6.68 (s, 1H), 6.50 (d, *J* = 7.9 Hz, 1H), 5.07 (d, *J* = 9.8 Hz, 1H), 4.87 (d, *J* = 9.9 Hz, 1H), 3.97 (d, *J* = 12.3 Hz, 1H), 3.94 (s, 3H), 3.62-3.54 (m, 1H), 3.33-3.22 (m, 1H), 3.12 (d, *J* = 12.4 Hz, 1H), 3.07-3.00 (m, 1H), 2.87 (td, *J* = 11.7, 3.3 Hz, 1H), 2.28 (s, 3H), 2.21 (s, 3H), 2.20 (s, 3H) ppm; **<sup>13</sup>C NMR (126 MHz, CDCl<sub>3</sub>)**: δ 157.8 (C), 149.8 (C), 147.0 (C), 143.5 (C), 137.2 (C), 136.9 (C), 133.9 (C), 130.4 (CH), 130.3 (C), 130.0 (CH), 129.8 (2xCH), 129.5 (2xCH), 128.8 (C), 128.3 (C), 127.3 (CH), 127.2 (C), 127.0 (2xCH), 126.3 (CH), 125.4 (CH), 125.3 (CH), 118.7 (CH), 117.4 (2xCH), 107.9 (CH), 105.6 (CH), 72.9 (C), 67.1 (CH), 55.5 (CH<sub>3</sub>), 49.7 (CH<sub>2</sub>), 47.0 (CH<sub>2</sub>), 41.6 (CH<sub>2</sub>), 21.6 (CH<sub>3</sub>), 20.8 (CH<sub>3</sub>), 20.6 (CH<sub>3</sub>) ppm; **IR (neat)**: 3269, 2921, 1605, 1513, 1486, 1439, 1328, 1215, 1156, 1092, 1027, 808, 666 cm<sup>-1</sup>; **HR-MS (ESI)**: *m/z* = 604.2618 [M+H]<sup>+</sup> (calculated for C<sub>37</sub>H<sub>38</sub>N<sub>3</sub>O<sub>3</sub>S *m/z* = 604.2628).

### Compound 3hA' (major dia):

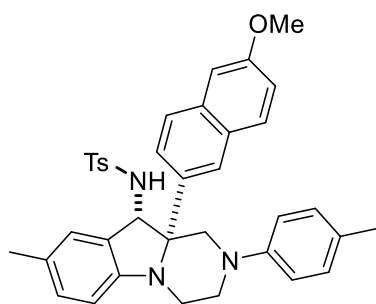

Following general procedure II, compound **3hA'** is obtained as a white solid (66 mg, 55% yield) starting from triazole **1h** and imidazolidine **2A** (51 mg, 0.2 mmol).

Purification: column chromatography (SiO<sub>2</sub>, pentane/EtOAc, 8:2).

**M.p.** = 111-113 °C; **Rf** = 0.25 (SiO<sub>2</sub>, pentane/EtOAc, 8:2); **<sup>1</sup>H NMR (400 MHz, CDCl<sub>3</sub>)**: δ 7.65 (d, *J* = 8.6 Hz, 1H), 7.55 (d, *J* = 8.8 Hz, 2H), 7.44-7.27 (m, 3H), 7.17-7.08 (m, 2H), 7.07-6.93 (m, 5H), 6.90-6.79 (m, 1H), 6.74 (d, *J* = 8.4 Hz, 2H), 6.55 (d, *J* = 8.0 Hz, 1H), 4.64 (d, *J* = 9.4 Hz, 1H), 4.36 (d, *J* = 9.4 Hz, 1H), 3.97 (d, *J* = 12.7 Hz, 1H) 3.94 (s, 3H), 3.64 (d, *J* = 13.5 Hz, 1H), 3.46-3.28 (m, 1H), 3.07 (d, *J* = 10.9 Hz, 1H), 2.98 (d, *J* = 12.4 Hz, 1H), 2.83 (td, *J* = 11.7, 3.3 Hz, 1H), 2.37 (s, 3H), 2.25 (s, 3H), 2.22 (s, 3H) ppm; **<sup>13</sup>C NMR (100 MHz, CDCl<sub>3</sub>)**: δ 158.1 (C), 149.7 (C), 147.6 (C), 143.1 (C), 138.2 (C), 134.0 (C), 132.3 (C), 130.6 (CH), 130.3 (C), 130.0 (CH), 129.7 (2xCH), 129.5 (2xCH), 129.1 (C), 128.2 (C), 128.1 (C), 127.6 (CH), 127.3 (CH), 127.0 (CH), 126.9 (2xCH), 126.0 (CH), 118.9 (CH), 117.6 (2xCH), 107.7 (CH), 105.6 (CH), 71.9 (C), 62.3 (CH), 55.5 (CH<sub>3</sub>), 55.4 (CH<sub>2</sub>), 47.7 (CH<sub>2</sub>), 41.5 (CH<sub>2</sub>), 21.7 (CH<sub>3</sub>), 20.8 (CH<sub>3</sub>), 20.6 (CH<sub>3</sub>) ppm; **IR (neat)**: 3290, 2922, 1606, 1513, 1492, 1335, 1265, 1212, 1157, 1034, 808, 664 cm<sup>-1</sup>; **HR-MS (ESI)**: *m/z* = 604.2642 [M+H]<sup>+</sup> (calculated for C<sub>37</sub>H<sub>38</sub>N<sub>3</sub>O<sub>3</sub>S *m/z* = 604.2628).

**Compound 3aB (both dia):**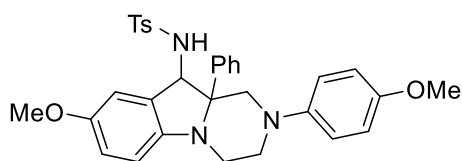

Following general procedure II, compound **3aB** is obtained as a brownish solid (100 mg, 90% yield) starting from triazole **1a** and imidazolidine **2B** (56 mg, 0.2 mmol).

Purification: column chromatography (SiO<sub>2</sub>, pentane/EtOAc, 8:2).

**M.p.** = 134-136 °C; **Rf** = 0.43 (SiO<sub>2</sub>, pentane/EtOAc, 7:3); **<sup>1</sup>H NMR (400 MHz, CDCl<sub>3</sub>, inseparable mixture of diastereoisomers (dr 1:3))**: δ [7.56 (*minor*) and 7.48 (*major*) (d, *J* = 8.3 Hz, 2H)], 7.36-7.28 (m, 5.6H, aromatics), 7.25-7.21 (m, 2.6H, aromatics), 7.19-7.14 (m, 1H, aromatics), 6.85-6.76 (m, 6.6H, aromatics), 6.56-6.51 (m, 3H, aromatics), 6.49 (*minor*, d, *J* = 8.6 Hz, 1H), 6.29-6.25 (*minor*, m, 1H), [4.90 (*minor*) and 4.54 (*major*) (d, *J* = 9.7 Hz, 1H)], [4.84 (*minor*) and 4.30 (*major*) (d, *J* = 9.7 Hz, 1H)], [3.85 (*minor*) and 4.83 (*major*) (d, *J* = 12.3 Hz, 1H)], [3.76 (*minor*) and 3.74 (*major*) (s, 3H)], [3.62 (*minor*) and 3.65 (*major*) (s, 3H)], 3.61-3.50 (m, 1H), 3.42-3.28 (m, 1H), [3.04 (*minor*) and 2.91 (*major*) (d, *J* = 12.3 Hz, 1H)], 3.02-2.94 (m, 1H), 2.85-2.76 (m, 1H), [2.40 (*minor*) and 2.43 (*major*) (s, 3H)] ppm; **<sup>13</sup>C NMR (100 MHz, CDCl<sub>3</sub>, inseparable mixture of diastereoisomers (dr 1:3))**: δ [154.53 (*major*) and 154.52 (*minor*) (C)], [153.3 (*minor*) and 153.2 (*major*) (C)], [146.2 (*minor*) and 146.1 (*major*) (C)], [144.0 (*major*) and 143.7 (*minor*) (C)], [143.39 (*minor*) and 143.37 (*major*) (C)], [142.0 (*minor*) and 138.5 (*major*) (C)], [137.6 (*minor*) and 137.3 (*major*) (C)], [129.9 (*minor*) and 129.8 (*major*) (2xCH)], [129.1 (*major*) and 128.6 (*minor*) (2xCH)], [128.9 (*major*) and 128.0 (*minor*) (C)], [127.8 (*major*) and 127.7 (*minor*) (2xCH)], [127.6 (*minor*) and 126.9 (*major*) (CH)], [127.19 (*minor*) and 127.16 (*major*) (2xCH)], [119.4 (*major*) and 119.3 (*minor*) (2xCH)], [116.3 (*major*) and 115.9 (*minor*) (CH)], [114.6 (*minor*) and 114.50 (*major*) (2xCH)], [112.2 (*major*) and 110.7 (*minor*) (CH)], [108.6 (*minor*) and 108.4 (*major*) (CH)], [73.21 (*minor*) and 72.24 (*major*) (C)], [67.1 (*minor*) and 62.2 (*major*) (CH)], [56.8 (*major*) and 51.5 (*minor*) (CH<sub>2</sub>)], [56.1 (*major*) and 56.1 (*minor*) (CH<sub>3</sub>)], [55.71 (*minor*) and 55.67 (*major*) (CH<sub>3</sub>)], [48.1 (*major*) and 47.6 (*minor*) (CH<sub>2</sub>)], [41.8 (*minor*) and 41.6 (*major*) (CH<sub>2</sub>)], [21.7 (*major*) and 21.6 (*minor*) (CH<sub>3</sub>)] ppm; **IR (neat)**: 2929, 1490, 1448, 1340, 1240, 1212, 1159, 1092, 1028, 915, 842, 812, 698, 660 cm<sup>-1</sup>; **HR-MS (ESI)**: *m/z* 556.2267 [M+H]<sup>+</sup> (calculated for C<sub>32</sub>H<sub>34</sub>N<sub>3</sub>O<sub>4</sub>S *m/z* = 556.2265).

**Compound 3aC'' (minor dia):**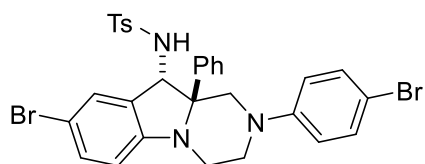

Following general procedure II, compound **3aC''** is obtained as a yellowish solid (22 mg, 17% yield) starting from triazole **1a** and imidazolidine **2C** (76 mg, 0.2 mmol).

Purification: column chromatography (SiO<sub>2</sub>, pentane/EtOAc, 9:1).

**M.p.** = 170-172 °C; **Rf** = 0.44 (SiO<sub>2</sub>, pentane/EtOAc, 8:2); **<sup>1</sup>H NMR (400 MHz, CDCl<sub>3</sub>)**: δ 7.60 (d, *J* = 8.3 Hz, 2H), 7.41-7.35 (m, 2H), 7.32 (d, *J* = 8.9 Hz, 2H), 7.28-7.21 (m, 6H), 6.74 (d, *J* = 8.9 Hz, 2H), 6.47-6.40 (m, 2H), 4.85 (d, *J* = 9.7 Hz, 1H), 4.79 (d, *J* = 9.7 Hz, 1H), 4.00 (d, *J* = 12.5 Hz, 1H), 3.63-3.53 (m, 1H), 3.44-3.31 (m, 1H), 3.19 (d, *J* = 12.6 Hz, 1H), 3.16-3.08 (m, 1H), 2.88 (td, *J* = 11.6, 3.7 Hz, 1H), 2.45 (s, 3H) ppm; **<sup>13</sup>C NMR (100 MHz, CDCl<sub>3</sub>)**: δ 150.5 (C), 148.4 (C), 144.3 (C), 141.4 (C), 137.3 (C), 132.9 (CH), 132.1 (2xCH), 130.2 (2xCH), 128.9 (2xCH), 128.7 (C), 127.9 (CH), 127.6 (CH), 127.2 (2xCH), 126.5 (2xCH), 118.5 (2xCH), 112.9 (C), 109.9 (C), 109.1 (CH), 73.0 (C), 66.3 (CH), 50.8 (CH<sub>2</sub>), 46.6 (CH<sub>2</sub>), 41.3 (CH<sub>2</sub>), 21.8 (CH<sub>3</sub>) ppm; **IR (neat)**: 3270, 2807, 1599, 1493, 1468, 1444, 1328, 1304, 1153, 1089, 808, 664 cm<sup>-1</sup>; **HR-MS (ESI)**: *m/z* = 652.0258 [M+H]<sup>+</sup> (calculated for C<sub>30</sub>H<sub>28</sub>Br<sub>2</sub>N<sub>3</sub>O<sub>2</sub>S *m/z* = 652.0264).



### Compound 3aC' (major dia):

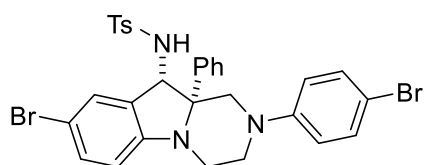

Following general procedure II, compound **3aC'** is obtained as a yellowish solid (91 mg, 69% yield) starting from triazole **1a** and imidazolidine **2C** (76 mg, 0.2 mmol).

Purification: column chromatography (SiO<sub>2</sub>, pentane/EtOAc, 9:1).

**M.p.** = 110-112 °C; **Rf** = 0.33 (SiO<sub>2</sub>, pentane/EtOAc, 8:2); **<sup>1</sup>H NMR (400 MHz, CDCl<sub>3</sub>)**: δ 7.56 (d, *J* = 8.3 Hz, 2H), 7.38-7.26 (m, 8H), 7.24-7.17 (m, 2H), 6.72-6.70 (m, 1H), 6.68 (d, *J* = 9.0 Hz, 2H), 6.45 (d, *J* = 8.4 Hz, 1H), 4.66 (d, *J* = 9.8 Hz, 1H), 4.23 (d, *J* = 9.8 Hz, 1H), 4.02 (d, *J* = 12.4 Hz, 1H), 3.63-3.55 (m, 1H), 3.39-3.29 (m, 1H), 3.21-3.14 (m, 1H), 2.96 (d, *J* = 12.5 Hz, 1H), 2.84 (td, *J* = 11.6, 3.6 Hz, 1H), 2.48 (s, 3H) ppm; **<sup>13</sup>C NMR (100 MHz, CDCl<sub>3</sub>)**: δ 150.5 (C), 148.7 (C), 144.0 (C), 138.2 (C), 136.0 (C), 132.9 (CH), 132.1 (2xCH), 130.0 (2xCH), 129.5 (C), 129.3 (2xCH), 129.1 (CH), 128.2 (CH), 127.7 (2xCH), 127.2 (2xCH), 118.7 (2xCH), 113.1 (C), 109.7 (C), 108.5 (CH), 72.3 (C), 61.9 (CH), 55.8 (CH<sub>2</sub>), 47.3 (CH<sub>2</sub>), 40.9 (CH<sub>2</sub>), 21.8 (CH<sub>3</sub>) ppm; **IR (neat)**: 3288, 2925, 1594, 1476, 1336, 1219, 1157, 1080, 909, 810, 662 cm<sup>-1</sup>; **HR-MS (ESI)**: *m/z* = 652.0267 [M+H]<sup>+</sup> (calculated for C<sub>30</sub>H<sub>28</sub>Br<sub>2</sub>N<sub>3</sub>O<sub>2</sub>S *m/z* = 652.0264).

### Compound 3aD'' (minor dia):

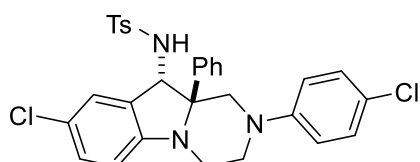

Following general procedure II, compound **3aD''** is obtained as a yellowish solid (20 mg, 18% yield) starting from triazole **1a** (3 equiv) and imidazolidine **2D** (58 mg, 0.2 mmol).

Purification: column chromatography (SiO<sub>2</sub>, pentane/EtOAc, 9:1).

**M.p.** = 224-226 °C; **Rf** = 0.49 (SiO<sub>2</sub>, pentane/EtOAc, 8:2); **<sup>1</sup>H NMR (400 MHz, CDCl<sub>3</sub>)**: δ 7.59 (d, *J* = 8.1 Hz, 2H), 7.42-7.35 (m, 2H), 7.30-7.21 (m, 5H), 7.19 (d, *J* = 8.9 Hz, 2H), 7.13 (dd, *J* = 8.4, 2.2 Hz, 1H), 6.79 (d, *J* = 8.9 Hz, 2H), 6.48 (d, *J* = 8.4 Hz, 1H), 6.39 (s, 1H), 4.84 (d, *J* = 9.7 Hz, 1H), 4.79 (d, *J* = 9.8 Hz, 1H), 4.00 (d, *J* = 13.2 Hz, 1H), 3.63-3.53 (m, 1H), 3.44-3.31 (m, 1H), 3.18 (d, *J* = 12.5 Hz, 1H), 3.15-3.06 (m, 1H), 2.88 (td, *J* = 11.6, 3.7 Hz, 1H), 2.44 (s, 3H) ppm; **<sup>13</sup>C NMR (100 MHz, CDCl<sub>3</sub>)**: δ 150.1 (C), 148.0 (C), 144.2 (C), 141.5 (C), 137.3 (C), 130.1 (2xCH), 130.1 (CH), 129.2 (2xCH), 128.9 (2xCH), 128.3 (C), 127.5 (CH), 127.2 (2xCH), 126.6 (2xCH), 125.6 (C), 125.1 (CH), 123.1 (C), 118.1 (2xCH), 108.5 (CH), 73.0 (C), 66.3 (CH), 50.9 (CH<sub>2</sub>), 46.7 (CH<sub>2</sub>), 41.3 (CH<sub>2</sub>), 21.7 (CH<sub>3</sub>) ppm; **IR (neat)**: 3269, 2807, 1599, 1496, 1469, 1444, 1329, 1243, 1212, 1154, 1091, 900, 809, 658 cm<sup>-1</sup>; **HR-MS (ESI)**: *m/z* = 564.1271 [M+H]<sup>+</sup> (calculated for C<sub>30</sub>H<sub>28</sub>Cl<sub>2</sub>N<sub>3</sub>O<sub>2</sub>S *m/z* = 564.1274).

### Compound 3aD' (major dia):

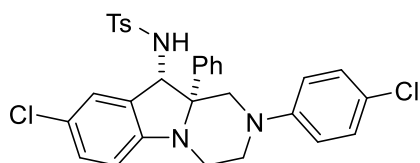

Following general procedure II, compound **3aD'** is obtained as a yellowish solid (63 mg, 56% yield) starting from triazole **1a** (3 equiv) and imidazolidine **2D** (58 mg, 0.2 mmol).

Purification: column chromatography (SiO<sub>2</sub>, pentane/EtOAc, 9:1).

**M.p.** = 154-156 °C; **Rf** = 0.36 (SiO<sub>2</sub>, pentane/EtOAc, 8:2); **<sup>1</sup>H NMR (400 MHz, CDCl<sub>3</sub>)**: δ 7.55 (d, *J* = 8.3 Hz, 2H), 7.37-7.27 (m, 5H), 7.24-7.19 (m, 2H), 7.19-7.12 (m, 3H), 6.73 (d, *J* = 9.0 Hz, 2H), 6.68-6.63 (m, 1H), 6.49 (d, *J* = 8.4 Hz, 1H), 4.65 (d, *J* = 9.8 Hz, 1H), 4.23 (d, *J* = 9.8 Hz, 1H), 4.02 (d, *J* = 12.4 Hz, 1H), 3.63-3.54 (m, 1H), 3.42-3.30 (m, 1H), 3.21-3.12 (m, 1H), 2.97 (d, *J* = 12.4 Hz, 1H), 2.84 (td, *J* = 11.7, 3.6 Hz, 1H), 2.47 (s, 3H) ppm; **<sup>13</sup>C NMR (100 MHz, CDCl<sub>3</sub>)**: δ 150.1 (C), 148.3 (C), 143.9 (C), 138.2 (C), 136.1 (C), 130.0 (CH), 129.9 (2xCH), 129.3 (2xCH), 129.2 (2xCH), 129.1 (C), 128.1 (CH), 127.7 (2xCH), 127.2 (2xCH), 126.4 (CH), 125.8 (C), 123.0 (C), 118.4 (2xCH), 107.9 (CH), 72.3 (C), 61.9 (CH), 56.0 (CH<sub>2</sub>), 47.4 (CH<sub>2</sub>), 41.0 (CH<sub>2</sub>), 21.7 (CH<sub>3</sub>) ppm; **IR (neat)**: 3351, 2823, 1597, 1493, 1337, 1226, 1159, 1051, 909, 818, 659 cm<sup>-1</sup>; **HR-MS (ESI)**: *m/z* = 564.1278 [M+H]<sup>+</sup> (calculated for C<sub>30</sub>H<sub>28</sub>Cl<sub>2</sub>N<sub>3</sub>O<sub>2</sub>S *m/z* = 564.1274).

## Analysis data for compounds 4

### Compound 4aE:

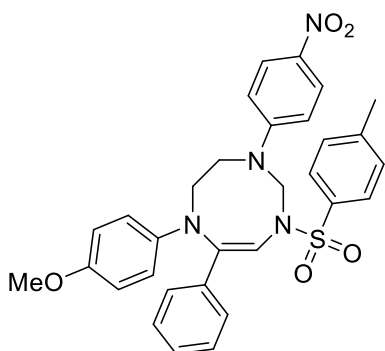

Following general procedure II, compound **4aE** is obtained as an orange solid (65 mg, 57% yield) starting from triazole **1a** and imidazolidine **2E** (59 mg, 0.2 mmol).

Purification: column chromatography (SiO<sub>2</sub>, pentane/EtOAc, 7:3).

**M.p.** = 181-183 °C; **Rf** = 0.47 (SiO<sub>2</sub>, pentane/EtOAc, 6:4); **<sup>1</sup>H NMR (400 MHz, CDCl<sub>3</sub>)**: δ 8.15 (d, *J* = 9.3 Hz, 2H), 7.58 (d, *J* = 8.3 Hz, 2H), 7.26-7.18 (m, 5H), 7.16-7.08 (m, 2H), 6.92 (d, *J* = 9.4 Hz, 2H), 6.84 (s, 1H), 6.49 (d, *J* = 9.1 Hz, 2H), 6.37 (d, *J* = 9.1 Hz, 2H), 5.26 (s, 2H), 3.70 (s, 3H), 3.69-3.56 (m, 4H), 2.45 (s, 3H) ppm; **<sup>13</sup>C NMR (100 MHz, CDCl<sub>3</sub>)**: δ 152.1 (C), 150.8 (C), 144.4 (C), 139.8 (C), 139.5 (C), 137.1 (C), 136.5 (C), 130.4 (C), 130.1 (2xCH), 128.8 (2xCH), 128.2 (CH), 126.9 (2xCH), 126.11 (2xCH), 126.08 (2xCH), 119.2 (CH), 115.3 (2xCH), 113.3 (2xCH), 112.5 (2xCH), 65.0 (CH<sub>2</sub>), 55.8 (CH<sub>3</sub>), 47.3 (CH<sub>2</sub>), 46.4 (CH<sub>2</sub>), 21.7 (CH<sub>3</sub>) ppm; **IR (neat)**: 1595, 1508, 1383, 1315, 1292, 1220, 1151, 1108, 998, 924, 815, 764, 748, 665 cm<sup>-1</sup>; **HR-MS (ESI)**: *m/z* = 571.2041 [M+H]<sup>+</sup> (calculated for C<sub>31</sub>H<sub>31</sub>N<sub>4</sub>O<sub>5</sub>S *m/z* = 571.2010).

### Compound 4eE:

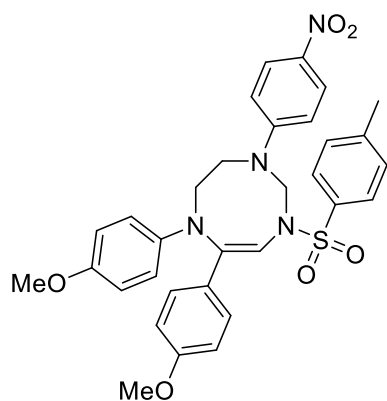

Following general procedure II, compound **4eE** is obtained as an orange solid (67 mg, 56% yield) starting from triazole **1e** and imidazolidine **2E** (59 mg, 0.2 mmol).

Purification: column chromatography (SiO<sub>2</sub>, pentane/EtOAc, 7:3) followed by recrystallization with CH<sub>2</sub>Cl<sub>2</sub>, Et<sub>2</sub>O and pentane.

**M.p.** = 138-140 °C; **Rf** = 0.48 (SiO<sub>2</sub>, pentane/EtOAc, 6:4); **<sup>1</sup>H NMR (400 MHz, CD<sub>2</sub>Cl<sub>2</sub>)**: δ 8.11 (d, *J* = 9.4 Hz, 2H), 7.58 (d, *J* = 8.4 Hz, 2H), 7.27 (d, *J* = 7.8 Hz, 2H), 7.05 (d, *J* = 8.8 Hz, 2H), 6.92 (d, *J* = 9.4 Hz, 2H), 6.74 (d, *J* = 8.8 Hz, 2H), 6.68 (s, 1H), 6.50 (d, *J* = 9.1 Hz, 2H), 6.39 (d, *J* = 9.1 Hz, 2H), 5.22 (s, 2H), 3.74 (s, 3H), 3.68 (s, 3H), 3.65-3.58 (m, 4H), 2.45 (s, 3H) ppm; **<sup>13</sup>C NMR (100 MHz, CD<sub>2</sub>Cl<sub>2</sub>)**: δ 160.3 (C), 152.6 (C), 151.6 (C), 145.0 (C), 140.1 (C), 139.7 (C), 137.5 (C), 131.3 (C), 130.5 (2xCH), 129.4 (C), 127.9 (2xCH), 127.2 (2xCH), 126.2 (2xCH), 117.7 (CH), 115.5 (2xCH), 114.5 (2xCH), 114.2 (2xCH), 112.9 (2xCH), 65.5 (CH<sub>2</sub>), 56.0 (CH<sub>3</sub>), 55.8 (CH<sub>3</sub>), 47.7 (CH<sub>2</sub>), 46.9 (CH<sub>2</sub>), 21.9 (CH<sub>3</sub>) ppm; **IR (neat)**: 1594, 1505, 1316, 1228, 1158, 1109, 1033, 994, 831, 815, 747, 657 cm<sup>-1</sup>; **HR-MS (ESI)**: *m/z* = 601.2139 [M+H]<sup>+</sup> (calculated for C<sub>32</sub>H<sub>33</sub>N<sub>4</sub>O<sub>6</sub>S *m/z* = 601.2116).

### Compound 4iE:

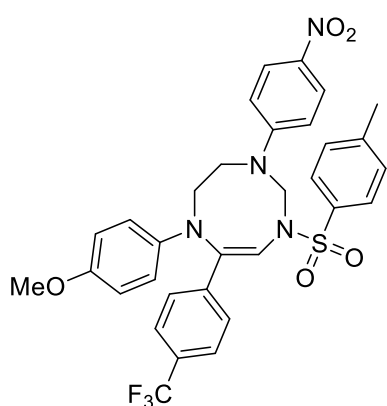

Following general procedure II, compound **4iE** is obtained as an orange solid (46 mg, 36% yield) starting from triazole **1i** and imidazolidine **2E** (60 mg, 0.2 mmol).

Purification: column chromatography (SiO<sub>2</sub>, pentane/EtOAc, 7:3) followed by recrystallization with CH<sub>2</sub>Cl<sub>2</sub>, Et<sub>2</sub>O and pentane.

**M.p.** = 147-149 °C; **Rf** = 0.47 (SiO<sub>2</sub>, pentane/EtOAc, 6:4); **<sup>1</sup>H NMR (400 MHz, CD<sub>2</sub>Cl<sub>2</sub>)**: δ 8.12 (d, *J* = 9.4 Hz, 2H), 7.59 (d, *J* = 8.4 Hz, 2H), 7.47 (d, *J* = 8.1 Hz, 2H), 7.32-7.24 (m, 4H), 6.97 (s, 1H), 6.95 (d, *J* = 9.4 Hz, 2H), 6.51 (d, *J* = 9.2 Hz, 2H), 6.38 (d, *J* = 9.1 Hz, 2H), 5.25 (s, 2H), 3.68 (s, 3H), 3.66-3.59 (m, 4H), 2.45 (s, 3H) ppm; **<sup>13</sup>C NMR (100 MHz, CD<sub>2</sub>Cl<sub>2</sub>)**: δ 152.9 (C), 151.4 (C), 145.3 (C), 141.3 (C), 140.0 (C), 139.7 (C), 137.3 (C), 130.6 (2xCH), 129.9 (q, *J* = 32.4 Hz, C), 129.4

(C), 127.2 (2xCH), 126.6 (2xCH), 126.3 (2xCH), 126.0 (q, *J* = 3.8 Hz, 2xCH), 124.8 (q, *J* = 271.8 Hz, CF<sub>3</sub>), 121.8 (CH), 115.7 (2xCH), 114.1 (2xCH), 113.0 (2xCH), 65.4 (CH<sub>2</sub>), 56.0 (CH<sub>3</sub>), 47.9 (CH<sub>2</sub>), 46.7 (CH<sub>2</sub>), 21.9 (CH<sub>3</sub>) ppm; **<sup>19</sup>F NMR (282 MHz, CD<sub>2</sub>Cl<sub>2</sub>)**: δ -62.83 ppm; **IR (neat)**: 1595, 1506, 1321, 1225, 1152, 1109, 1067, 999, 921, 833, 814, 744, 672 cm<sup>-1</sup>; **HR-MS (ESI)**: *m/z* = 639.1911 [M+H]<sup>+</sup> (calculated for C<sub>32</sub>H<sub>30</sub>F<sub>3</sub>N<sub>4</sub>O<sub>5</sub>S *m/z* = 639.1884).

## 6. Synthesis of 3A

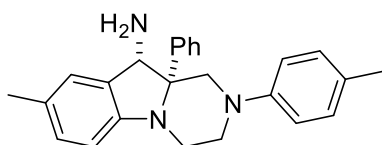

In a 25 mL two-neck flask under N<sub>2</sub> atmosphere, sodium (69 mg, 3 mmol, 20 equiv; washed free of oil in hexane) was added to a stirred suspension of naphthalene (385 mg, 3 mmol, 20 equiv) in 7 mL of tetrahydrofuran at 25 °C. The resulting green suspension was stirred at 25 °C for 4 h and cooled down to -78 °C. Then, a solution

of hexahydropyrazino[1,2-*a*]indole **3aA'** (79 mg, 0.15 mmol, 1 equiv) in tetrahydrofuran (7 mL) was slowly added to the green solution. The dark-green solution was stirred at -78 °C for 30 min and at 25 °C for 15 h. Then, the mixture was cooled down at -78 °C and 2 mL of water were added. The reaction mixture was extracted with CH<sub>2</sub>Cl<sub>2</sub> (3×10 mL). The combined organic layers were washed with brine, dried over Na<sub>2</sub>SO<sub>4</sub> and concentrated under reduced pressure. The residue was purified by silica gel chromatography to afford amine **3A** as a white solid (43 mg, 78% yield).

**M.p.** = 53-55 °C; **<sup>1</sup>H NMR (400 MHz, CDCl<sub>3</sub>)**: δ 7.58 (d, *J* = 7.7 Hz, 2H), 7.50-7.41 (m, 2H), 7.37-7.29 (m, 1H), 7.19-7.14 (m, 1H), 7.09-7.04 (m, 1H), 7.03-6.98 (m, 2H), 6.77 (d, *J* = 8.5 Hz, 2H), 6.61 (d, *J* = 8.1 Hz, 1H), 3.93 (dd, *J* = 12.5, 1.6 Hz, 1H), 3.86 (s, 1H), 3.75-3.62 (m, 1H), 3.75-3.62 (m, 1H), 3.48 (ddd, *J* = 14.2, 12.1, 3.6 Hz, 1H), 3.07 (ddt, *J* = 11.3, 3.5, 1.7 Hz, 1H), 2.93 (d, *J* = 12.5 Hz, 1H), 2.87 (td, *J* = 11.8, 3.2 Hz, 1H), 2.29 (s, 3H), 2.24 (s, 3H) ppm; **<sup>13</sup>C NMR (100 MHz, CDCl<sub>3</sub>)**: δ 150.1 (C), 147.8 (C), 138.8 (C), 131.9 (C), 130.1 (C), 129.9 (CH), 129.7 (2xCH), 129.1 (2xCH), 128.0 (C), 127.6 (CH), 127.43 (CH), 127.35 (2xCH), 117.64 (2xCH), 108.7 (CH), 73.8 (C), 61.8 (CH), 55.4 (CH<sub>2</sub>), 47.2 (CH<sub>2</sub>), 41.9 (CH<sub>2</sub>), 20.9 (CH<sub>3</sub>), 20.6 (CH<sub>3</sub>) ppm; **IR (neat)**: 2922, 1615, 1512, 1490, 1448, 1358, 1249, 1222, 1206, 1098, 1037, 981, 804, 701 cm<sup>-1</sup>; **HR-MS (ESI)**: 370.2291 [M+H]<sup>+</sup> (calculated for C<sub>25</sub>H<sub>28</sub>N<sub>3</sub> *m/z* = 370.2278).

## 7. Scheme S2. Mechanistic rationale for the formation of 5

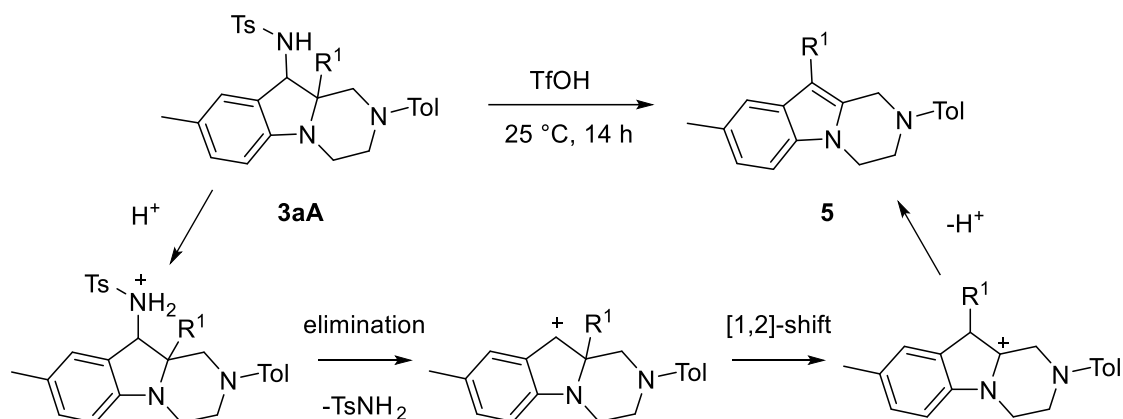

Tetrahydropyrazino[1,2-*a*]indole of type **5** are probably formed through protonation and elimination of TsNH<sub>2</sub> followed by a 1,2-shift of the aryl group (*R*<sup>1</sup>) and a final proton loss.

## 8. General Procedure III: synthesis of tetrahydropyrazino[1,2-*a*]indoles **5**

In a 2 mL screw-cap vial equipped with a magnetic stirring bar, 0.1 mmol of 1,2,3,4-tetrahydropyrazino[1,2-*a*]indoles **3** (as single or mixture of diastereoisomers) and 2.3 mmol (23 equiv) of triflic acid were added. The mixture was stirred at 25 °C during 14 h. Then, few milliliters of water were carefully added on the crude reaction mixture followed by the addition of NaHCO<sub>3</sub>. The aqueous mixture was extracted with CH<sub>2</sub>Cl<sub>2</sub> (3 x 20 mL). The combined organic layers were dried over MgSO<sub>4</sub> and concentrated under reduced pressure. The residue was purified by column chromatography.

### Compound **5aA**:

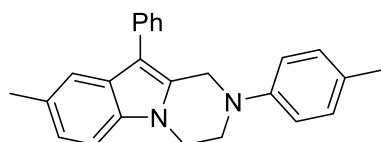

Following general procedure III, compound **5aA** is obtained as an orange solid (43 mg, 82% yield) starting from hexahydropyrazino[1,2-*a*]indole **3aA** (52 mg, 0.1 mmol).

Purification: column chromatography (SiO<sub>2</sub>, pentane/EtOAc, 8.5:1.5).

**M.p.** = 149-151 °C; **R<sub>f</sub>** = 0.64 (SiO<sub>2</sub>, pentane/EtOAc, 8:2); **<sup>1</sup>H NMR (400 MHz, CDCl<sub>3</sub>)**: δ 7.59 (m, 1H), 7.55-7.45 (m, 4H), 7.34-7.28 (m, 1H), 7.23 (d, *J* = 8.2 Hz, 1H), 7.12-7.04 (m, 3H), 6.92 (d, *J* = 8.5 Hz, 2H), 4.62 (s, 2H), 4.21 (t, *J* = 5.6 Hz, 2H), 3.77 (t, *J* = 5.6 Hz, 2H), 2.46 (s, 3H), 2.27 (s, 3H) ppm; **<sup>13</sup>C NMR (100 MHz, CDCl<sub>3</sub>)**: δ 148.0 (C), 135.2 (C), 134.7 (C), 130.7 (C), 130.4 (C), 130.0 (2xCH), 129.9 (C), 129.1 (2xCH), 128.8 (2xCH), 127.4 (C), 125.8 (CH), 123.0 (CH), 119.0 (CH), 117.6 (2xCH), 111.7 (C), 108.6 (CH), 48.4 (CH<sub>2</sub>), 48.1 (CH<sub>2</sub>), 41.7 (CH<sub>2</sub>), 21.8 (CH<sub>3</sub>), 20.6 (CH<sub>3</sub>) ppm; **IR (neat)**: 2922, 1598, 1546, 1512, 1454, 1365, 1230, 1150, 1114, 946, 818, 764, 704 cm<sup>-1</sup>; **HR-MS (ESI)**: *m/z* = 353.2024 [M+H]<sup>+</sup> (calculated for C<sub>25</sub>H<sub>25</sub>N<sub>2</sub> *m/z* = 353.2013).

### Compound 5dA:

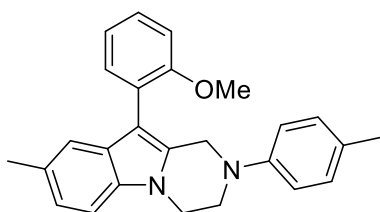

Following general procedure III, compound **5dA** is obtained as an orange solid (33 mg, 87% yield) starting from hexahydropyrazino[1,2-*a*]indole **3dA** (55 mg, 0.1 mmol).

Purification: column chromatography (SiO<sub>2</sub>, pentane/EtOAc, 9:1).

**M.p.** = 78-80 °C; **Rf** = 0.41 (SiO<sub>2</sub>, pentane/EtOAc, 9:1); **<sup>1</sup>H NMR (500 MHz, CDCl<sub>3</sub>)**: δ 7.48 (dd, *J* = 7.4, 1.8 Hz, 1H), 7.37-7.31 (m, 2H), 7.20 (d, *J* = 8.2 Hz, 1H), 7.09 (td, *J* = 7.4, 1.1 Hz, 1H), 7.07-7.04 (m, 3H), 7.02 (dd, *J* = 8.3, 1.6 Hz, 1H), 6.91 (d, *J* = 8.6 Hz, 2H), 4.46 (s, 2H), 4.18 (t, *J* = 5.6 Hz, 2H), 3.84 (s, 3H), 3.82-3.77 (m, 2H), 2.42 (s, 3H), 2.26 (s, 3H) ppm; **<sup>13</sup>C NMR (126 MHz, CDCl<sub>3</sub>)**: δ 157.1 (C), 148.0 (C), 134.6 (C), 132.1 (CH), 131.6 (C), 130.0 (C), 129.9 (2xCH), 129.4 (C), 128.1 (C), 127.9 (CH), 123.6 (C), 122.6 (CH), 120.8 (CH), 119.1 (CH), 117.5 (2xCH), 111.3 (CH), 108.5 (CH), 107.3 (C), 55.5 (CH<sub>3</sub>), 48.3 (CH<sub>2</sub>), 48.0 (CH<sub>2</sub>), 41.3 (CH<sub>2</sub>), 21.7 (CH<sub>3</sub>), 20.6 (CH<sub>3</sub>) ppm; **IR (neat)**: 2919, 1615, 1514, 1452, 1372, 1238, 1025, 791, 751, 645 cm<sup>-1</sup>; **HR-MS (ESI)**: *m/z* = 383.2116 [M+H]<sup>+</sup> (calculated for C<sub>26</sub>H<sub>26</sub>N<sub>2</sub>O *m/z* = 383.2123).

### Compound 5fA:

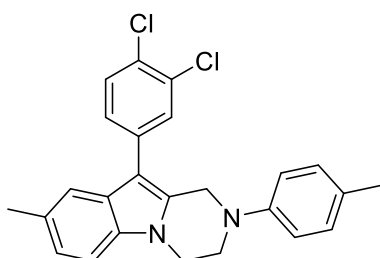

Following general procedure III, compound **5fA** is obtained as an orange solid (37 mg, 88% yield) starting from hexahydropyrazino[1,2-*a*]indole **3fA** (59 mg, 0.1 mmol).

Purification: column chromatography (SiO<sub>2</sub>, pentane/EtOAc, 9:1).

**M.p.** = 76-78 °C; **Rf** = 0.51 (SiO<sub>2</sub>, pentane/EtOAc, 9:1); **<sup>1</sup>H NMR (500 MHz, CDCl<sub>3</sub>)**: δ 7.58 (d, *J* = 2.1 Hz, 1H), 7.53 (d, *J* = 8.2 Hz, 1H), 7.50-7.46 (m, 1H), 7.33 (dd, *J* = 8.3, 2.1 Hz, 1H), 7.23 (d, *J* = 8.3 Hz, 1H), 7.12-7.05 (m, 3H), 6.91 (d, *J* = 8.6 Hz, 2H), 4.57 (s, 2H), 4.20 (t, *J* = 5.6 Hz, 2H), 3.77 (t, *J* = 5.6 Hz, 2H), 2.47 (s, 3H), 2.28 (s, 3H) ppm; **<sup>13</sup>C NMR (126 MHz, CDCl<sub>3</sub>)**: δ 147.8 (C), 135.5 (C), 134.7 (C), 132.8 (C), 131.3 (C), 130.74 (C), 130.72 (CH), 130.5 (CH), 130.4 (C), 130.1 (2xCH), 129.5 (C), 128.2 (CH), 126.9 (C), 123.5 (CH), 118.4 (CH), 117.6 (2xCH), 109.4 (C), 108.8 (CH), 48.3 (CH<sub>2</sub>), 48.1 (CH<sub>2</sub>), 41.7 (CH<sub>2</sub>), 21.8 (CH<sub>3</sub>), 20.6 (CH<sub>3</sub>) ppm; **IR (neat)**: 2919, 1591, 1513, 1485, 1452, 1369, 1230, 1114, 1026, 792 cm<sup>-1</sup>; **HR-MS (ESI)**: *m/z* = 421.1238 [M+H]<sup>+</sup> (calculated for C<sub>25</sub>H<sub>23</sub>Cl<sub>2</sub>N<sub>2</sub> *m/z* = 421.1206).

### Compound 5gA:

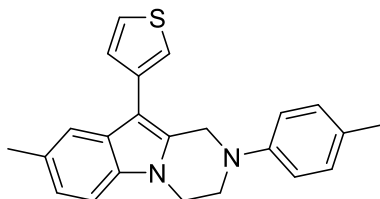

Following general procedure III, compound **5gA** is obtained as an orange solid (28 mg, 77% yield) starting from hexahydropyrazino[1,2-*a*]indole **3gA** (53 mg, 0.1 mmol).

Purification: column chromatography (SiO<sub>2</sub>, pentane/EtOAc, 9:1).

**M.p.** = 112-114 °C; **Rf** = 0.64 (SiO<sub>2</sub>, pentane/EtOAc, 9:1); **<sup>1</sup>H NMR (400 MHz, CDCl<sub>3</sub>)**: δ 7.60-7.54 (m, 1H), 7.47 (dd, *J* = 5.0, 2.9 Hz, 1H), 7.39 (dd, *J* = 4.9, 1.3 Hz, 1H), 7.25 (d, *J* = 1.4 Hz, 1H), 7.22 (d, *J* = 8.1 Hz, 1H), 7.10 (d, *J* = 8.1 Hz, 2H), 7.06 (dd, *J* = 8.2, 1.6 Hz, 1H), 6.94 (d, *J* = 8.5 Hz, 2H), 4.63 (s, 2H), 4.19 (t, *J* = 5.6 Hz, 2H), 3.76 (t, *J* = 5.6 Hz, 2H), 2.48 (s, 3H), 2.28 (s, 3H) ppm; **<sup>13</sup>C NMR (126 MHz, CDCl<sub>3</sub>)**: δ 148.0 (C), 135.3 (C), 134.5 (C), 130.7 (C), 130.4 (C), 130.0 (2xCH), 129.8 (C), 128.3 (CH), 127.4 (C), 125.5 (CH), 123.0 (CH), 120.2 (CH), 119.1 (CH), 117.5 (2xCH), 108.6 (CH), 106.7 (C), 48.2 (CH<sub>2</sub>), 48.2 (CH<sub>2</sub>), 41.7 (CH<sub>2</sub>), 21.8 (CH<sub>3</sub>), 20.6 (CH<sub>3</sub>) ppm; **IR (neat)**: 2916, 1614, 1512, 1486, 1451, 1372, 1217, 1157, 866, 790 cm<sup>-1</sup>; **HR-MS (ESI)**: *m/z* = 359.1595 [M+H]<sup>+</sup> (calculated for C<sub>23</sub>H<sub>23</sub>N<sub>2</sub>S *m/z* = 359.1582).

### Compound 5hA:

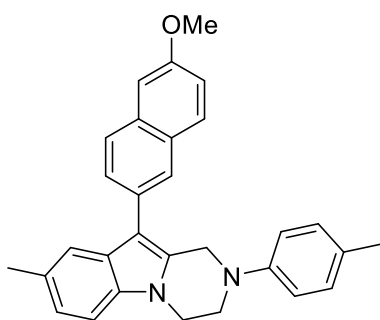

Following general procedure III, compound **5hA** is obtained as an orange solid (37 mg, 86% yield) starting from hexahydropyrazino[1,2-*a*]indole **3hA** (60 mg, 0.1 mmol).

Purification: column chromatography (SiO<sub>2</sub>, pentane/EtOAc, 9:1).

**M.p.** = 110-112 °C; **Rf** = 0.42 (SiO<sub>2</sub>, pentane/EtOAc, 9:1); **<sup>1</sup>H NMR (500 MHz, CDCl<sub>3</sub>)**: δ 7.85 (d, *J* = 8.5 Hz, 1H), 7.83-7.82 (m, 1H), 7.79 (d, *J* = 8.7 Hz, 1H), 7.67 (dd, *J* = 8.3, 1.8 Hz, 1H), 7.61-7.57 (m, 1H), 7.25-7.16 (m, 3H), 7.10-7.03 (m, 3H), 6.91 (d, *J* = 8.7 Hz, 2H), 4.67 (s, 2H), 4.23 (t, *J* = 5.6 Hz, 2H), 3.96 (s, 3H), 3.80 (t, *J* = 5.6 Hz, 2H), 2.47 (s, 3H), 2.26 (s, 3H) ppm; **<sup>13</sup>C NMR (126 MHz, CDCl<sub>3</sub>)**: δ 157.6 (C), 148.0 (C), 134.7 (C), 133.0 (C), 130.8 (C), 130.5 (C), 130.4 (C), 130.0 (2xCH), 129.9 (C), 129.5 (C), 129.4 (CH), 128.4 (CH), 127.6 (C), 127.1 (2xCH), 123.1 (CH), 119.1 (CH), 118.9 (CH), 117.6 (2xCH), 111.7 (C), 108.7 (CH), 105.9 (CH), 55.5 (CH<sub>3</sub>), 48.3 (CH<sub>2</sub>), 48.2 (CH<sub>2</sub>), 41.7 (CH<sub>2</sub>), 21.8 (CH<sub>3</sub>), 20.6 (CH<sub>3</sub>) ppm; **IR (neat)**: 2921, 1606, 1513, 1482, 1453, 1373, 1267, 1203, 1158, 1031, 853, 807 cm<sup>-1</sup>; **HR-MS (ESI)**: *m/z* = 433.2284 [M+H]<sup>+</sup> (calculated for C<sub>30</sub>H<sub>29</sub>N<sub>2</sub>O *m/z* = 433.2280).

### Compound 5aB:

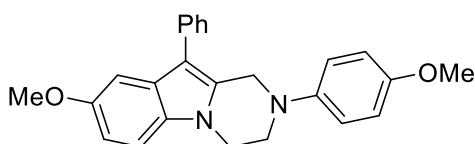

Following general procedure III, compound **5aB** is obtained as an orange solid (30 mg, 78% yield) starting from hexahydropyrazino[1,2-*a*]indole **3aB** (55 mg, 0.1 mmol).

Purification: column chromatography (SiO<sub>2</sub>, pentane/EtOAc, 8.5:1.5).

**M.p.** = 139-141 °C; **Rf** = 0.39 (SiO<sub>2</sub>, pentane/EtOAc, 8:2); **<sup>1</sup>H NMR (400 MHz, CDCl<sub>3</sub>)**: δ 7.54-7.45 (m, 4H), 7.34-7.28 (m, 1H), 7.25-7.22 (m, 2H), 6.98 (d, *J* = 9.1 Hz, 2H), 6.90 (dd, *J* = 8.7, 2.5 Hz, 1H), 6.84 (d, *J* = 9.0 Hz, 2H), 4.55 (s, 2H), 4.19 (t, *J* = 5.6 Hz, 2H), 3.85 (s, 3H), 3.76 (s, 3H), 3.70 (t, *J* = 5.6 Hz, 2H) ppm; **<sup>13</sup>C NMR (100 MHz, CDCl<sub>3</sub>)**: δ 155.1 (C), 154.7 (C), 144.4 (C), 135.2 (C), 131.6 (C), 131.4 (C), 128.89 (2xCH), 128.88 (2xCH), 127.4 (C), 125.8 (CH), 119.7 (2xCH), 114.7 (2xCH), 111.8 (C), 111.5 (CH), 109.7 (CH), 101.3 (CH), 56.1 (CH<sub>3</sub>), 55.7 (CH<sub>3</sub>), 49.2 (CH<sub>2</sub>), 49.1 (CH<sub>2</sub>), 41.8 (CH<sub>2</sub>).ppm; **IR (neat)**: 2923, 1599, 1513, 1482, 1438, 1298, 1252, 1213, 1160, 1032, 762, 705 cm<sup>-1</sup>; **HR-MS (ESI)**: *m/z* = 385.1922 [M+H]<sup>+</sup> (calculated for C<sub>25</sub>H<sub>25</sub>N<sub>2</sub>O<sub>2</sub> *m/z* = 385.1916).

### Compound 5aC:

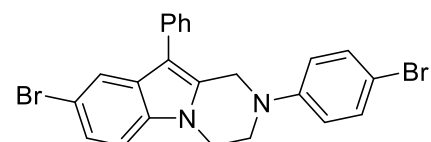

Following general procedure III, compound **5aC** is obtained as an orange solid (37 mg, 77% yield) starting from hexahydropyrazino[1,2-*a*]indole **3aC** (65 mg, 0.1 mmol).

Purification: column chromatography (SiO<sub>2</sub>, pentane/EtOAc, 8.5:1.5).

**M.p.** = 111-113 °C; **Rf** = 0.43 (SiO<sub>2</sub>, pentane/EtOAc, 9:1); **<sup>1</sup>H NMR (400 MHz, CDCl<sub>3</sub>)**: δ 7.86 (d, *J* = 1.8 Hz, 1H), 7.53-7.44 (m, 4H), 7.38-7.29 (m, 4H), 7.20 (d, *J* = 8.7 Hz, 1H), 6.84 (d, *J* = 9.0 Hz, 2H), 4.64 (s, 2H), 4.21 (t, *J* = 5.6 Hz, 2H), 3.81 (t, *J* = 5.6 Hz, 2H) ppm; **<sup>13</sup>C NMR (100 MHz, CDCl<sub>3</sub>)**: δ 148.8 (C), 134.9 (C), 134.1 (C), 132.3 (2xCH), 130.9 (C), 129.1 (2xCH), 128.9 (2xCH), 128.7 (C), 126.5 (CH), 124.5 (CH), 121.9 (CH), 118.6 (2xCH), 114.0 (C), 113.1 (C), 112.1 (C), 110.4 (CH), 47.6 (CH<sub>2</sub>), 47.2 (CH<sub>2</sub>), 41.6 (CH<sub>2</sub>) ppm; **IR (neat)**: 2923, 1598, 1491, 1447, 1370, 1341, 1211, 1157, 1080, 769, 703 cm<sup>-1</sup>; **HR-MS (ESI)**: *m/z* = 482.9890 [M+H]<sup>+</sup> (calculated for C<sub>23</sub>H<sub>19</sub>Br<sub>2</sub>N<sub>2</sub> *m/z* = 482.9896).

## 9. Postfunctionalizations of 5aA via oxidative C-C bond formation

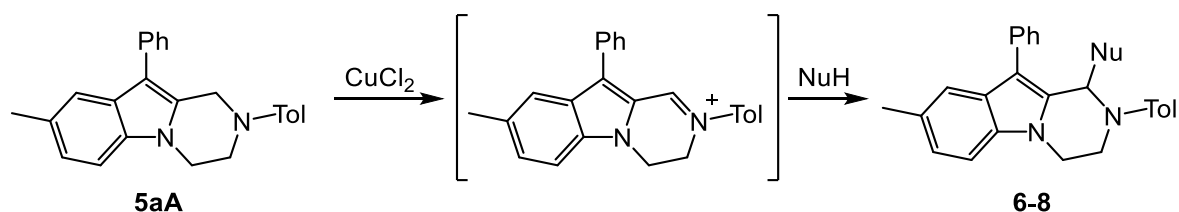

### Synthesis of 6

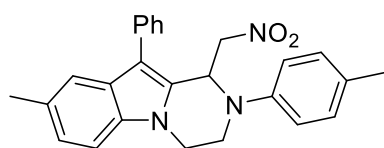

In a 5 mL screw-cap vial equipped with a magnetic stirring bar, tetrahydropyrazino[1,2-*a*]indole **5aA** (35 mg, 0.1 mmol, 1 equiv) and CuCl<sub>2</sub> (13 mg, 1 equiv) were dissolved in a 1:1 mixture of MeNO<sub>2</sub>/THF (2 mL). After 3 h stirring at 25 °C, DIPEA (19 μL, 1.1 equiv) was added and the mixture was stirred at 25 °C during 2 h

more. The residue was purified by a short silica gel chromatography (pentane/EtOAc, 8:2) to afford **6** as a yellowish solid (38 mg, 92% yield).

**M.p.** = 112-114 °C;

**R<sub>f</sub>** = 0.74 (SiO<sub>2</sub>, pentane/EtOAc, 8:2);

**<sup>1</sup>H NMR (500 MHz, CDCl<sub>3</sub>):** δ 7.58-7.49 (m, 4H), 7.47-7.43 (m, 1H), 7.37 (tt, *J* = 6.7, 1.7 Hz, 1H), 7.22 (d, *J* = 8.3 Hz, 1H), 7.12-7.06 (m, 3H), 6.99 (d, *J* = 8.6 Hz, 2H), 6.07 (dd, *J* = 10.7, 4.5 Hz, 1H), 4.71 (dd, *J* = 12.4, 10.8 Hz, 1H), 4.28 (dd, *J* = 12.4, 4.5 Hz, 1H), 4.11-4.00 (m, 2H), 3.96-3.82 (m, 2H), 2.44 (s, 3H), 2.28 (s, 3H) ppm;

**<sup>13</sup>C NMR (126 MHz, CDCl<sub>3</sub>):** δ 146.7 (C), 134.9 (C), 134.1 (C), 131.8 (C), 130.5 (C), 130.2 (2xCH), 129.4 (2xCH), 129.0 (2xCH), 127.2 (C), 127.1 (CH), 126.6 (C), 124.1 (CH), 119.5 (2xCH), 119.1 (CH), 113.4 (C), 108.8 (CH), 75.8 (CH<sub>2</sub>), 54.5 (CH), 43.7 (CH<sub>2</sub>), 38.2 (CH<sub>2</sub>), 21.7 (CH<sub>3</sub>), 20.7 (CH<sub>3</sub>) ppm;

**IR (neat):** 2922, 2854, 1604, 1553, 1512, 1455, 1374, 1297, 1199, 1150, 1112, 1022, 795, 732, 700 cm<sup>-1</sup>;

**HR-MS (ESI):** *m/z* = 412.2022 [M+H]<sup>+</sup> (calculated for C<sub>26</sub>H<sub>26</sub>N<sub>3</sub>O<sub>2</sub> *m/z* = 412.2025).

### Synthesis of 7

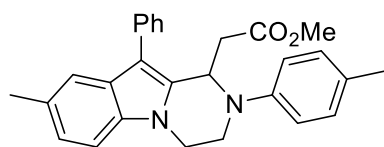

In a 5 mL screw-cap vial equipped with a magnetic stirring bar, tetrahydropyrazino[1,2-*a*]indole **5aA** (35 mg, 0.1 mmol, 1 equiv) and CuCl<sub>2</sub> (13 mg, 1 equiv) were dissolved in THF (1 mL). After 16 h stirring at 25 °C, 1-tert-butyldimethylsilyloxy-1-methoxyethene (43 μL, 2 equiv) was added and the mixture was stirred at 25 °C. After

3 h, another extra equivalent of 1-tert-butyldimethylsilyloxy-1-methoxyethene (21 μL) was added to the mixture and it was stirred at 25 °C during 3 h more. The residue was purified by a short silica gel chromatography (pentane/EtOAc, 9:1) to afford **7** as a yellowish solid (31 mg, 73% yield).

**M.p.** = 70-72 °C;

**R<sub>f</sub>** = 0.50 (SiO<sub>2</sub>, pentane/EtOAc, 9:1);

**<sup>1</sup>H NMR (500 MHz, CDCl<sub>3</sub>):** δ 7.57-7.51 (m, 2H), 7.51-7.45 (m, 2H), 7.44-7.40 (m, 1H), 7.33 (ddt, *J* = 7.6, 6.9, 1.4 Hz, 1H), 7.20 (d, *J* = 8.2 Hz, 1H), 7.08 (d, *J* = 8.1 Hz, 2H), 7.06 (dd, *J* = 8.3, 2.3 Hz, 1H), 7.01 (d, *J* = 8.6 Hz, 2H), 5.83 (dd, *J* = 9.8, 5.0 Hz, 1H), 4.14-4.03 (m, 2H), 3.93-3.83 (m, 2H), 3.43 (s, 3H), 2.86 (dd, *J* = 14.9, 9.8 Hz, 1H), 2.54 (dd, *J* = 14.9, 5.0 Hz, 1H), 2.43 (s, 3H), 2.27 (s, 3H) ppm;

**<sup>13</sup>C NMR (126 MHz, CDCl<sub>3</sub>):** δ 170.9 (C), 147.0 (C), 134.9 (C), 134.6 (C), 131.9 (C), 130.1 (C), 130.0 (2xCH), 129.9 (C), 129.4 (2xCH), 129.0 (2xCH), 127.6 (C), 126.5 (CH), 123.4 (CH), 118.9 (CH), 118.04 (2xCH), 112.07 (C), 108.6 (CH), 52.7 (CH), 51.7 (CH<sub>3</sub>), 42.3 (CH<sub>2</sub>), 39.4 (CH<sub>2</sub>), 38.9 (CH<sub>2</sub>), 21.6 (CH<sub>3</sub>), 20.6 (CH<sub>3</sub>).ppm;

**IR (neat):** 2922, 1736, 1603, 1513, 1485, 1434, 1367, 1260, 1228, 1170, 1111, 1014, 972, 794, 700 cm<sup>-1</sup>;

**HR-MS (ESI):** m/z = 425.2232 [M+H]<sup>+</sup> (calculated for C<sub>28</sub>H<sub>29</sub>N<sub>2</sub>O<sub>2</sub> m/z = 425.2229).

## Synthesis of 8

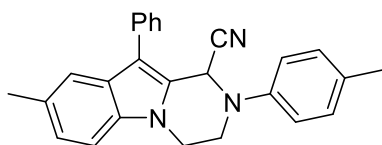

In a 5 mL screw-cap vial equipped with a magnetic stirring bar, tetrahydropyrazino[1,2-*a*]indole **5aA** (35 mg, 0.1 mmol, 1 equiv) and CuCl<sub>2</sub> (13 mg, 1 equiv) were dissolved in THF (1 mL). After 16 h stirring at 25 °C, a solution of NaCN (7 mg, 1.5 equiv) in MeOH (0.3 mL) was added and the mixture was stirred at 25 °C. After 3 h, another solution of NaCN (7 mg, 1.5 equiv) in MeOH (0.3 mL) was added to the mixture and it was stirred at 25 °C during 3 h more. The residue was diluted with CH<sub>2</sub>Cl<sub>2</sub> and washed three times with saturated NH<sub>4</sub>Cl aq. The organic layer was dried over MgSO<sub>4</sub> and concentrated under reduced pressure to afford **8** as a yellowish solid (35 mg, 93% yield).

**M.p.** = 149-151 °C;

**R<sub>f</sub>** = 0.80 (SiO<sub>2</sub>, pentane/EtOAc, 8:2);

**<sup>1</sup>H NMR (500 MHz, CDCl<sub>3</sub>):** δ 7.63-7.58 (m, 2H), 7.56-7.50 (m, 3H), 7.41-7.36 (m, 1H), 7.30 (d, *J* = 8.4 Hz, 1H), 7.20-7.14 (m, 3H), 7.02 (d, *J* = 8.7 Hz, 2H), 5.61 (d, *J* = 1.4 Hz, 1H), 4.42 (ddd, *J* = 11.2, 4.0, 1.7 Hz, 1H), 4.10 (td, *J* = 11.3, 5.5 Hz, 1H), 3.95-3.80 (m, 2H), 2.47 (s, 3H), 2.31 (s, 3H) ppm;

**<sup>13</sup>C NMR (126 MHz, CDCl<sub>3</sub>):** δ 145.7 (C), 135.3 (C), 133.5 (C), 130.7 (C), 130.4 (2xCH), 129.5 (2xCH), 129.2 (2xCH), 127.5 (C), 127.00 (CH), 126.99 (C), 124.9 (CH), 124.4 (C), 119.8 (CH), 119.6 (2xCH), 116.2 (C), 114.9 (C), 109.3 (CH), 51.0 (CH), 44.7 (CH<sub>2</sub>), 42.4 (CH<sub>2</sub>), 21.7 (CH<sub>3</sub>), 20.8 (CH<sub>3</sub>) ppm;

**IR (neat):** 2920, 2856, 1511, 1453, 1360, 1300, 1220, 1146, 1115, 951, 907, 872, 801, 699 cm<sup>-1</sup>;

**HR-MS (ESI):** m/z = 378.1988 [M+H]<sup>+</sup> (calculated for C<sub>26</sub>H<sub>24</sub>N<sub>3</sub> m/z = 378.1970).



## 10. NMR spectra of new compounds

Compound 3aA''  $^1\text{H}$  NMR ( $\text{CDCl}_3$ , 400 MHz)

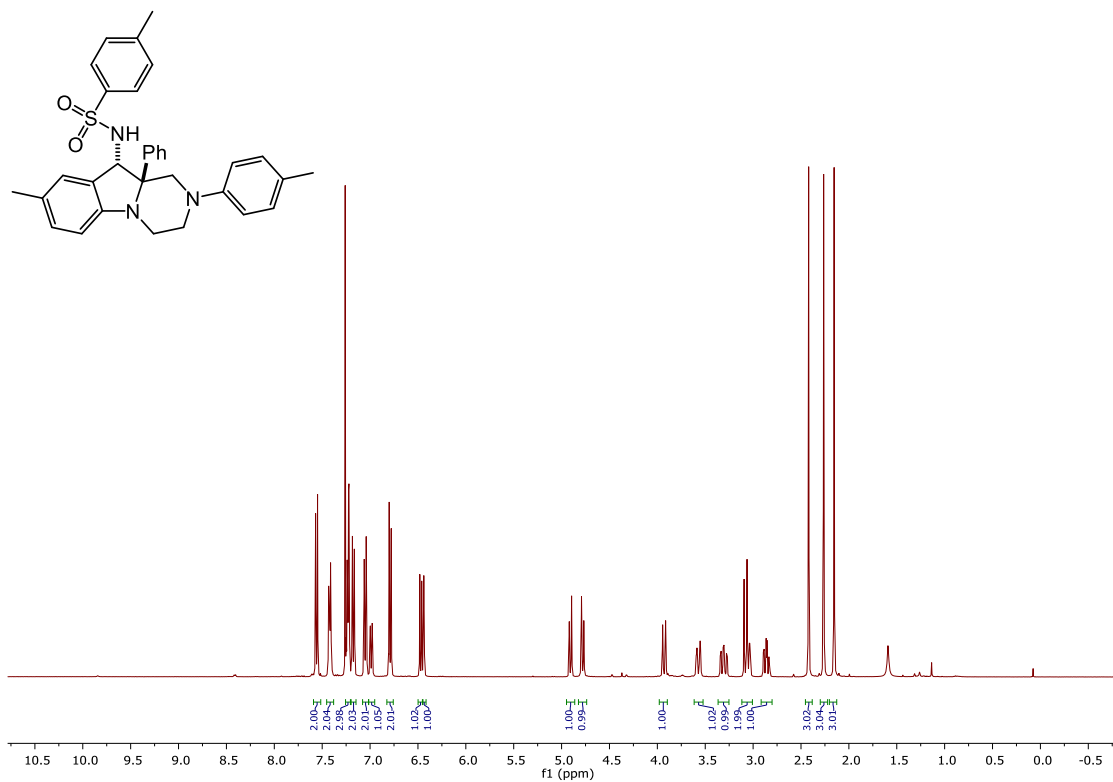

Compound 3aA''  $^{13}\text{C}$  NMR ( $\text{CDCl}_3$ , 100 MHz)

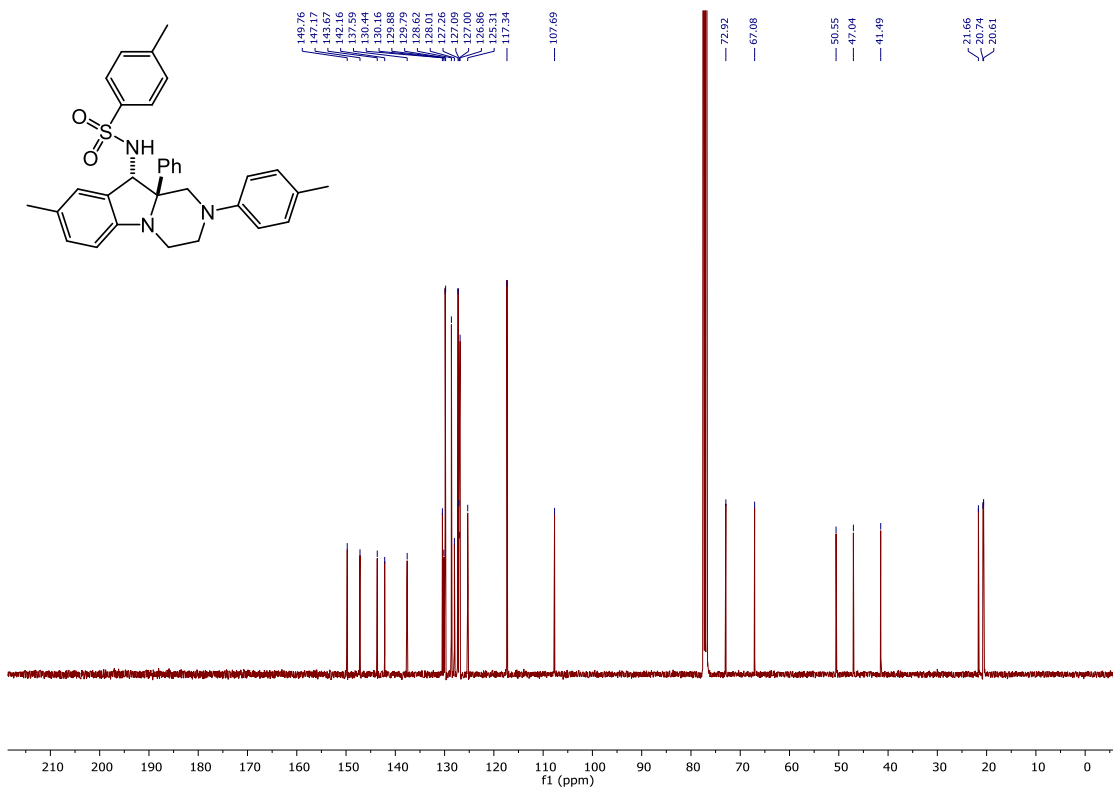

Compound 3aA' <sup>1</sup>H NMR (CDCl<sub>3</sub>, 400 MHz)

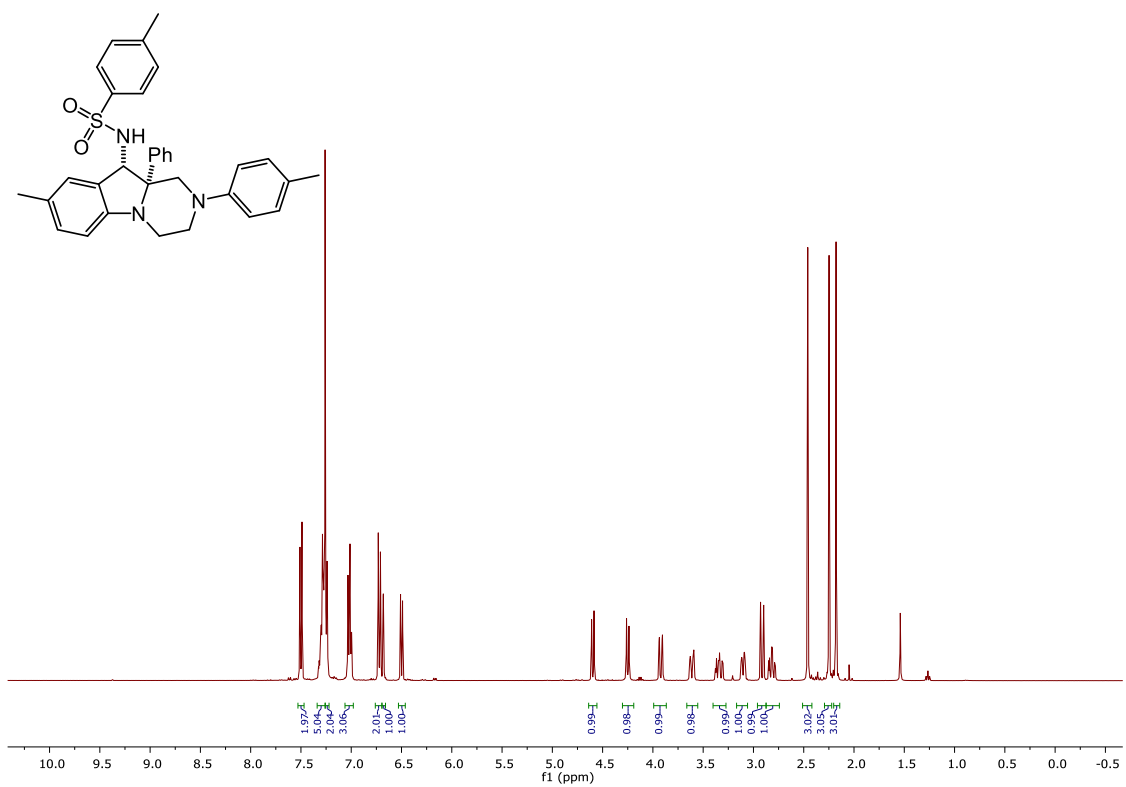

Compound 3aA' <sup>13</sup>C NMR (CDCl<sub>3</sub>, 100 MHz)

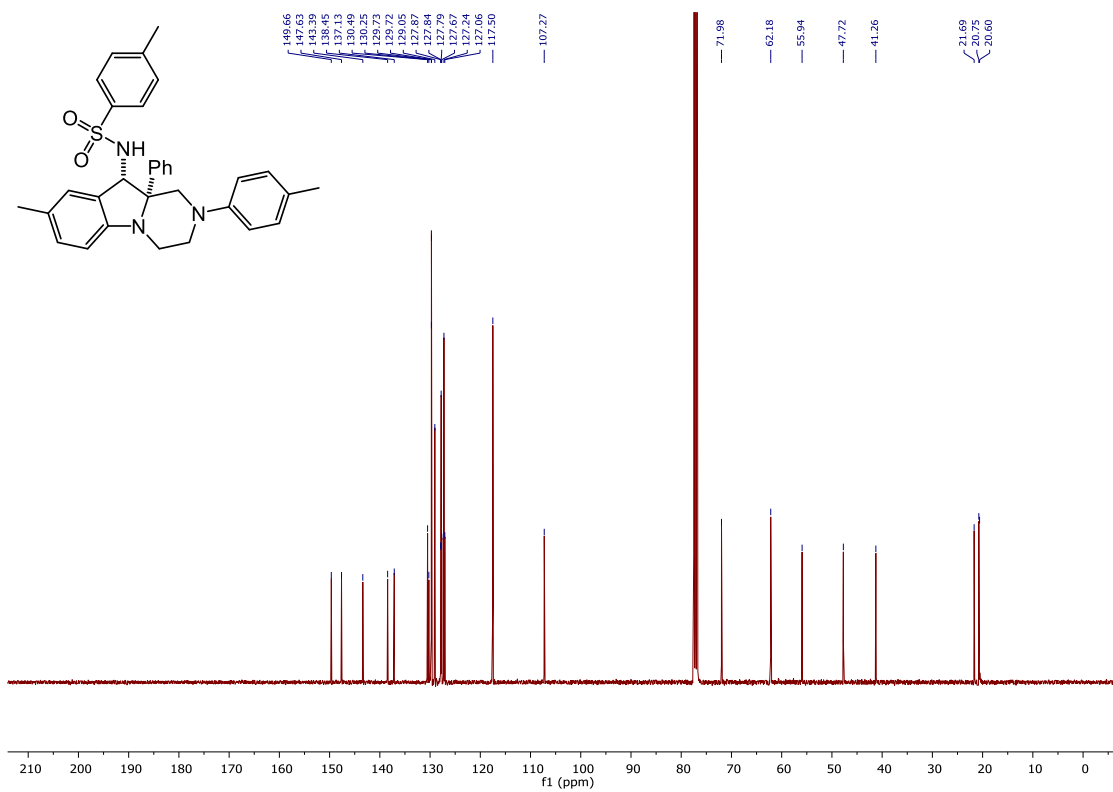

Compound 3bA'' <sup>1</sup>H NMR (CDCl<sub>3</sub>, 400 MHz)

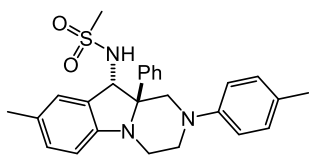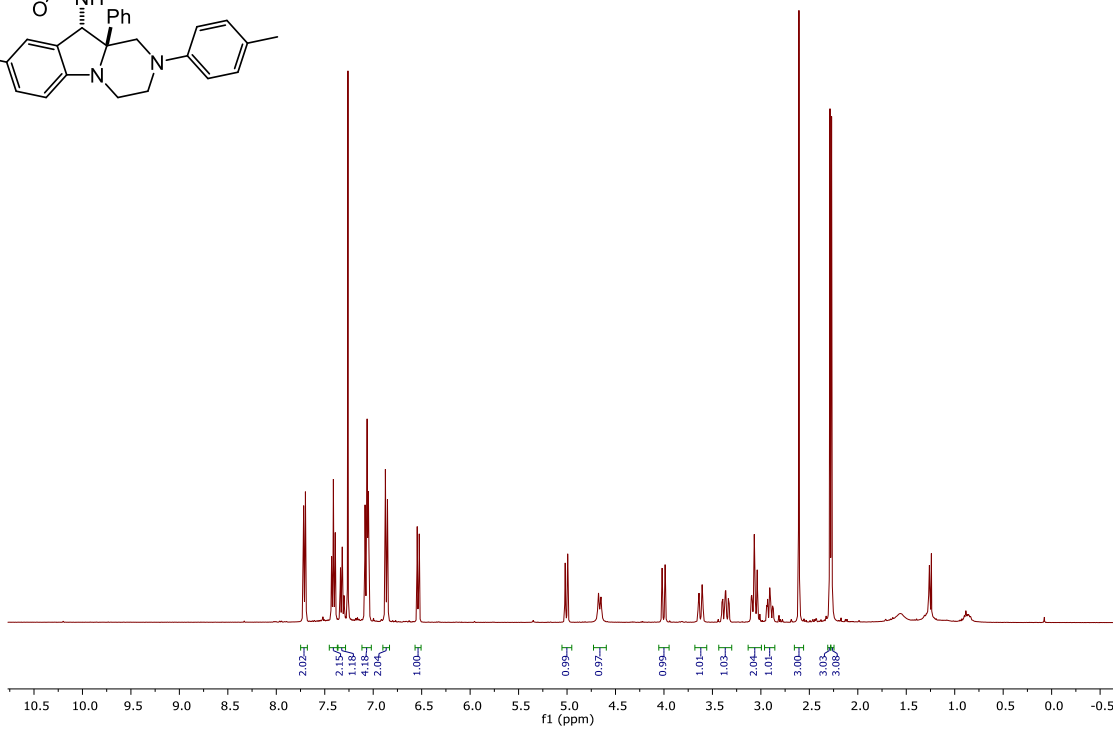

Compound 3bA'' <sup>13</sup>C NMR (CDCl<sub>3</sub>, 100 MHz)

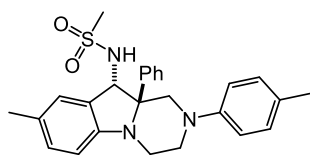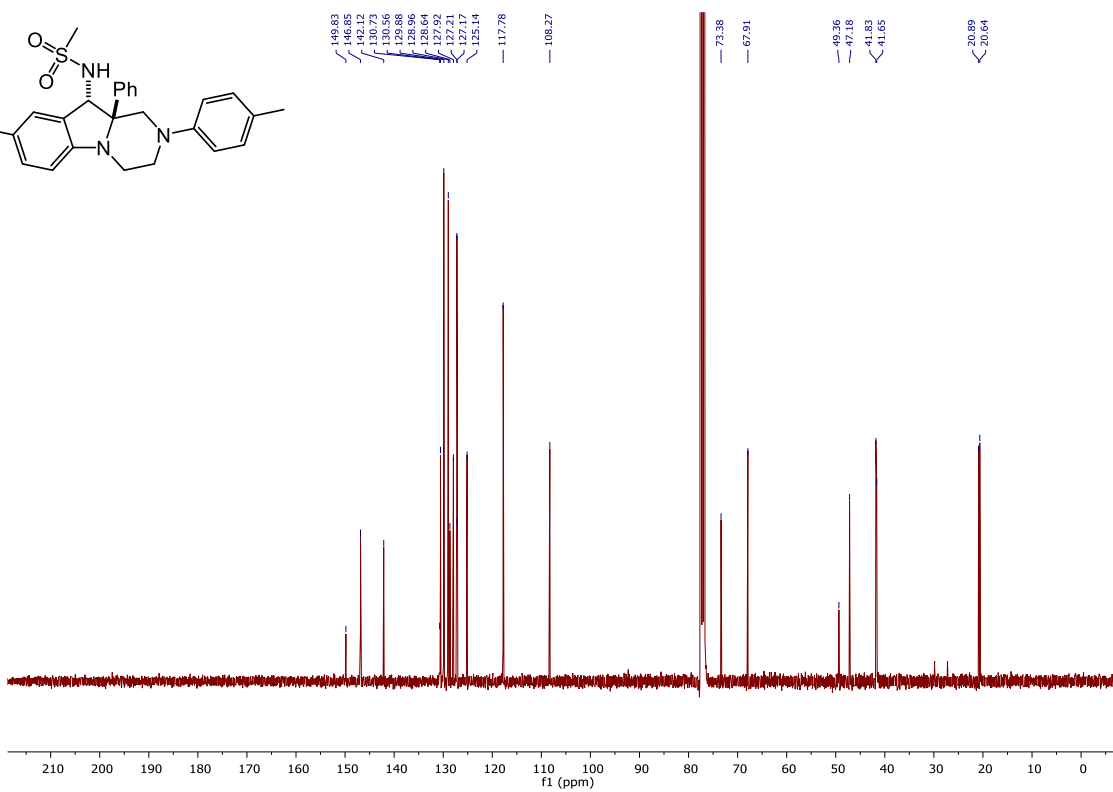

Compound 3bA' <sup>1</sup>H NMR (CDCl<sub>3</sub>, 400 MHz)

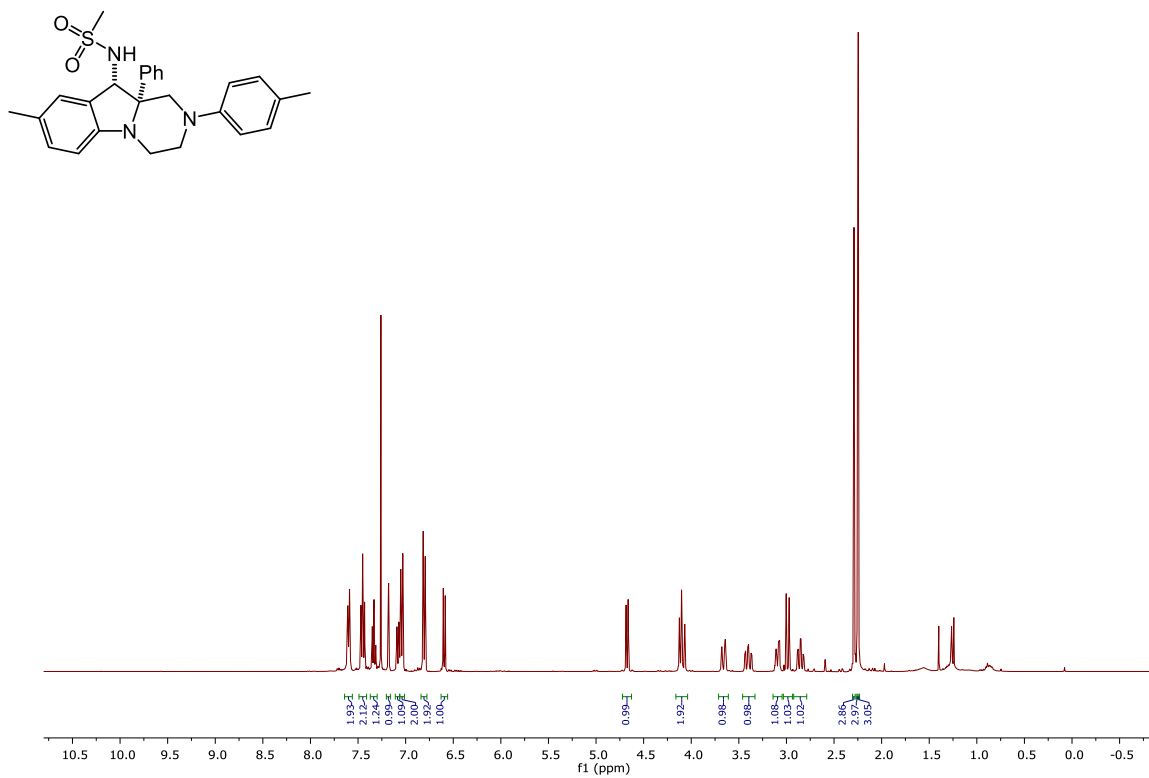

Compound 3bA' <sup>13</sup>C NMR (CDCl<sub>3</sub>, 100 MHz)

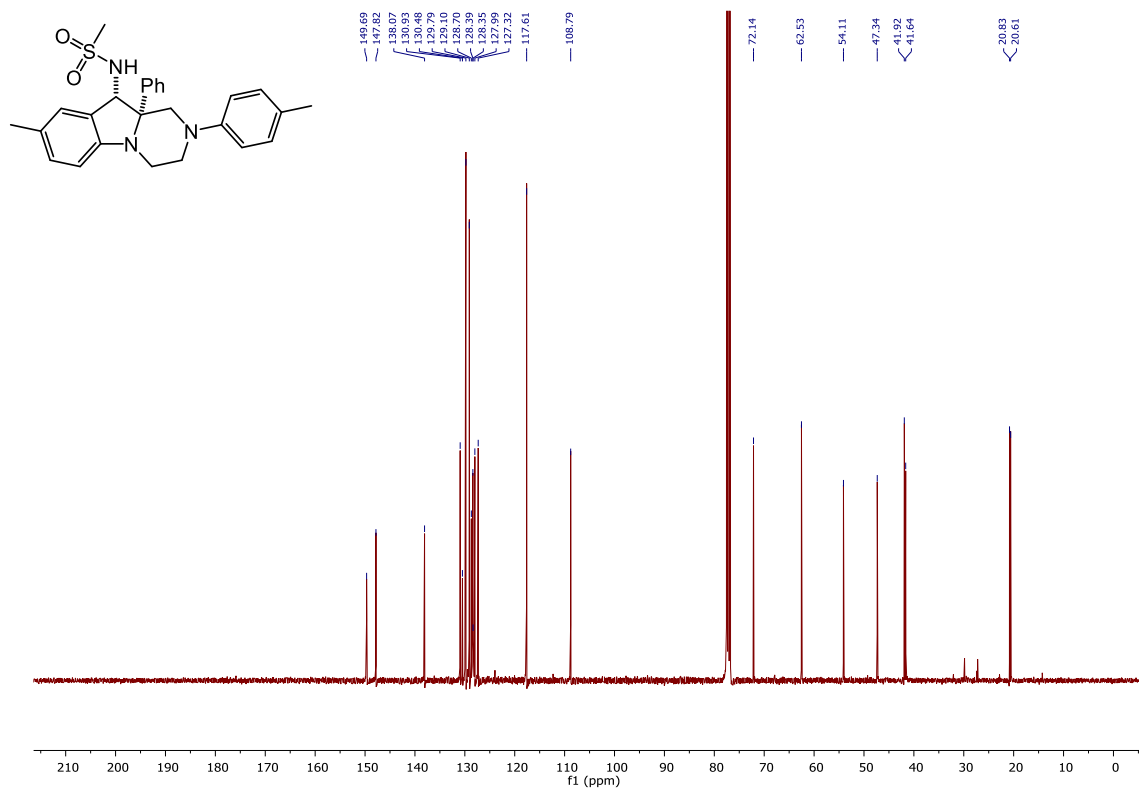

Compound 3cA'' <sup>1</sup>H NMR (CDCl<sub>3</sub>, 400 MHz)

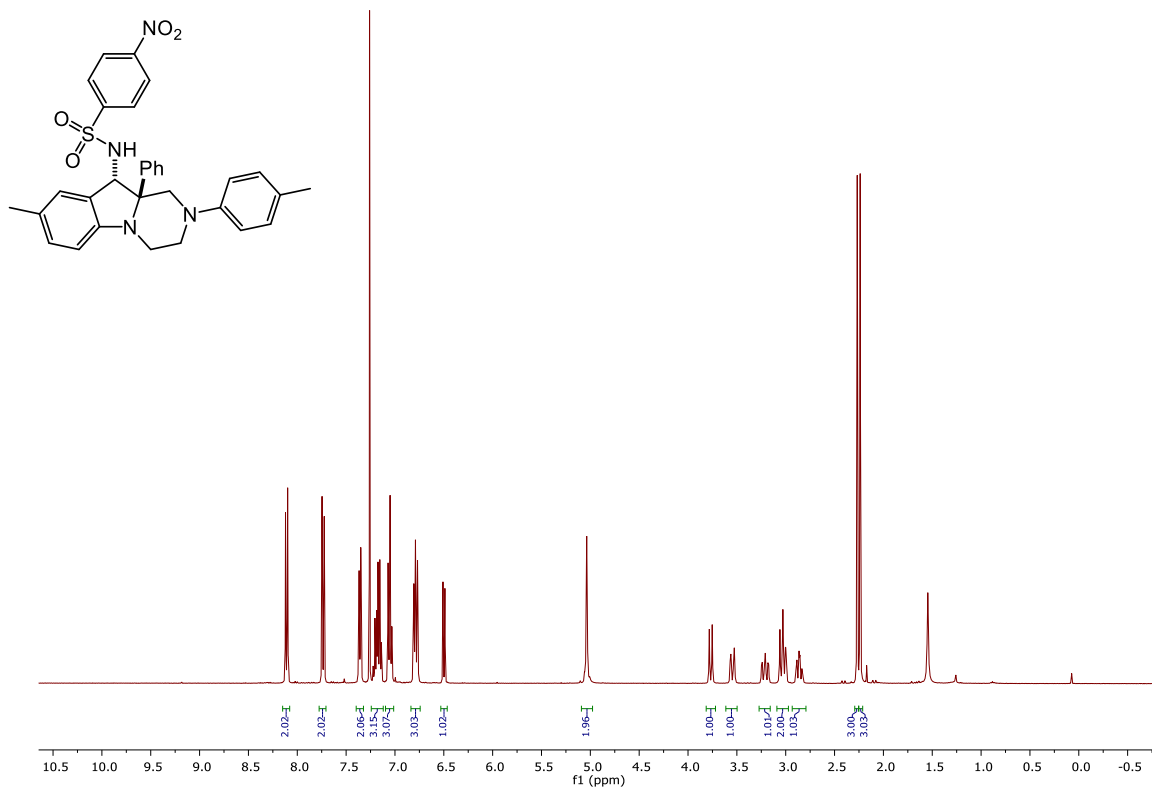

Compound 3cA'' <sup>13</sup>C NMR (CDCl<sub>3</sub>, 100 MHz)

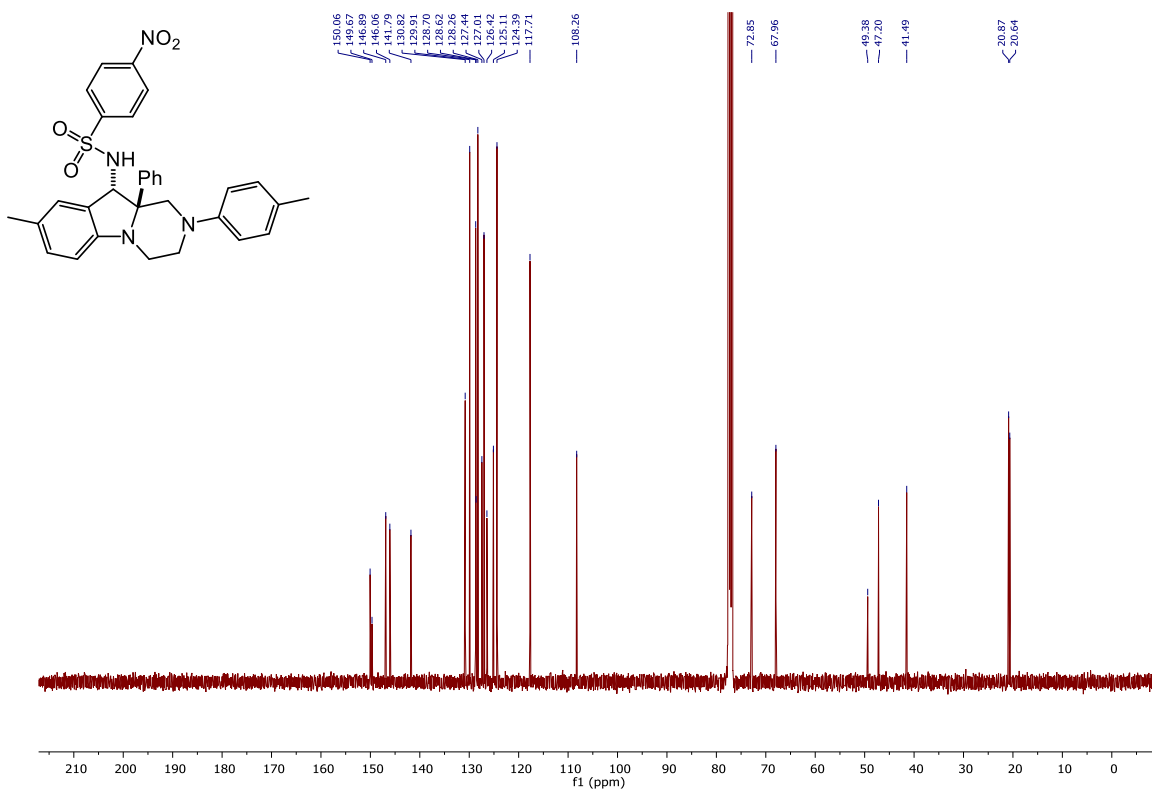

Compound 3cA' <sup>1</sup>H NMR (CDCl<sub>3</sub>, 400 MHz)

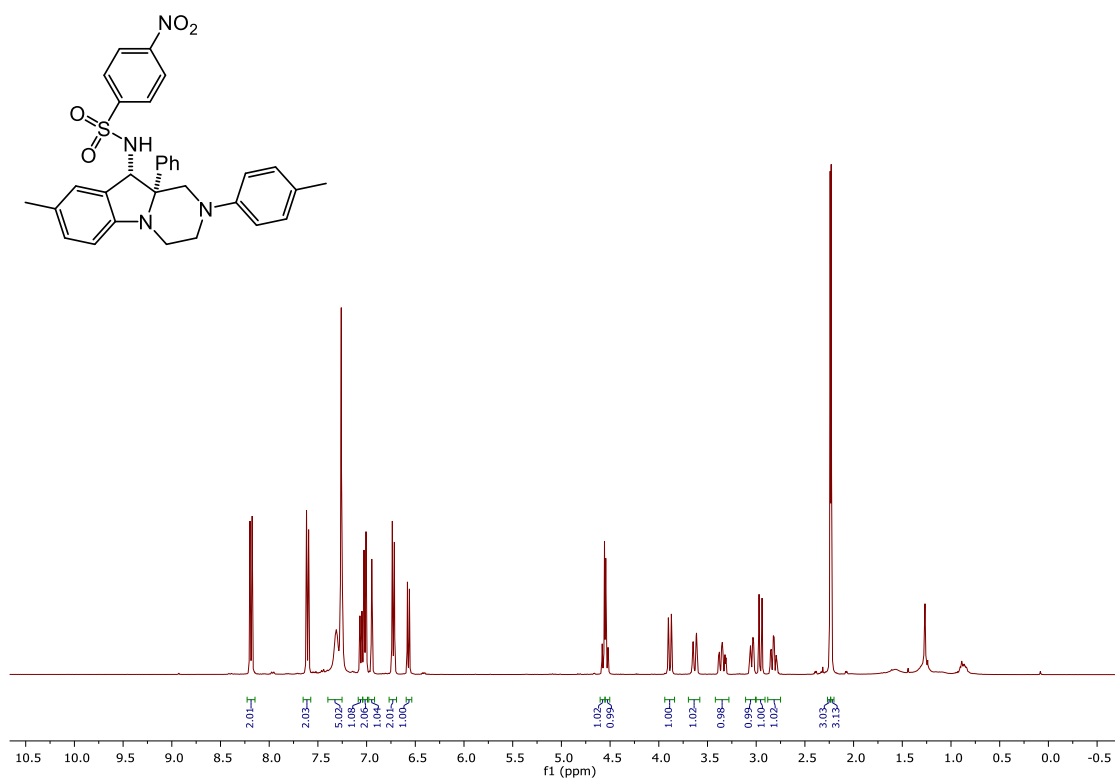

Compound 3cA' <sup>13</sup>C NMR (CDCl<sub>3</sub>, 100 MHz)

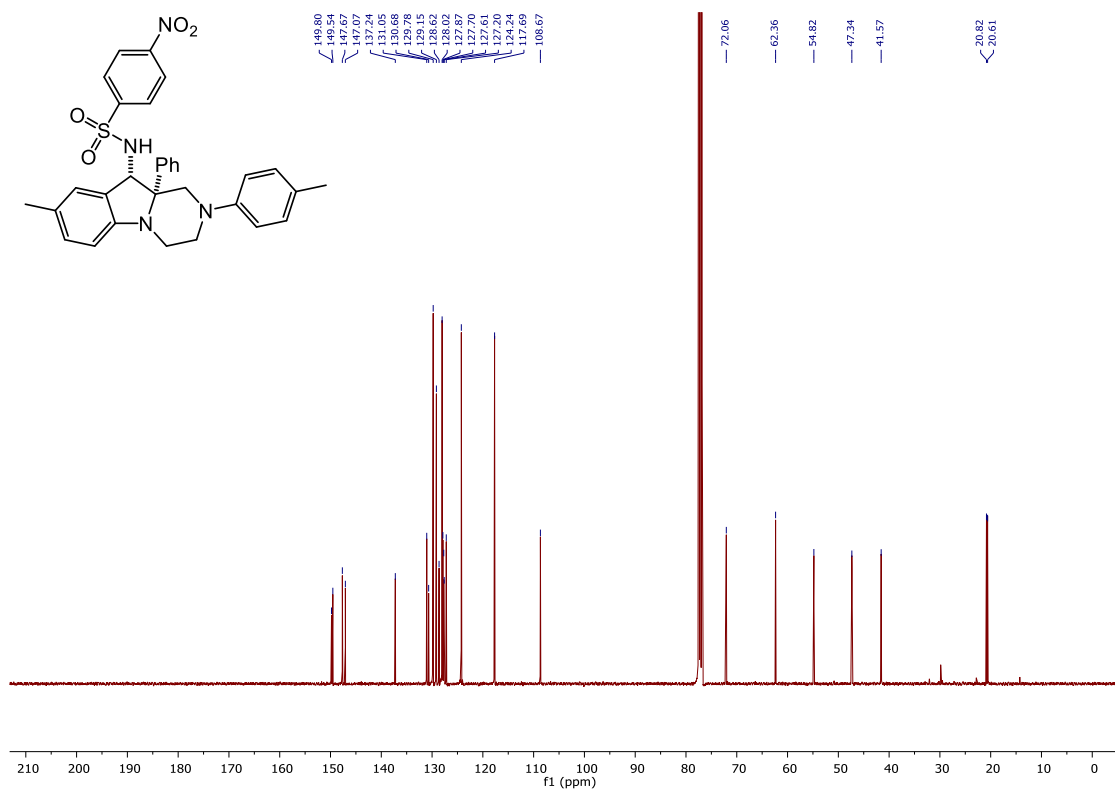

**Compound 3dA**  $^1\text{H}$  NMR ( $\text{CDCl}_3$ , 400 MHz)

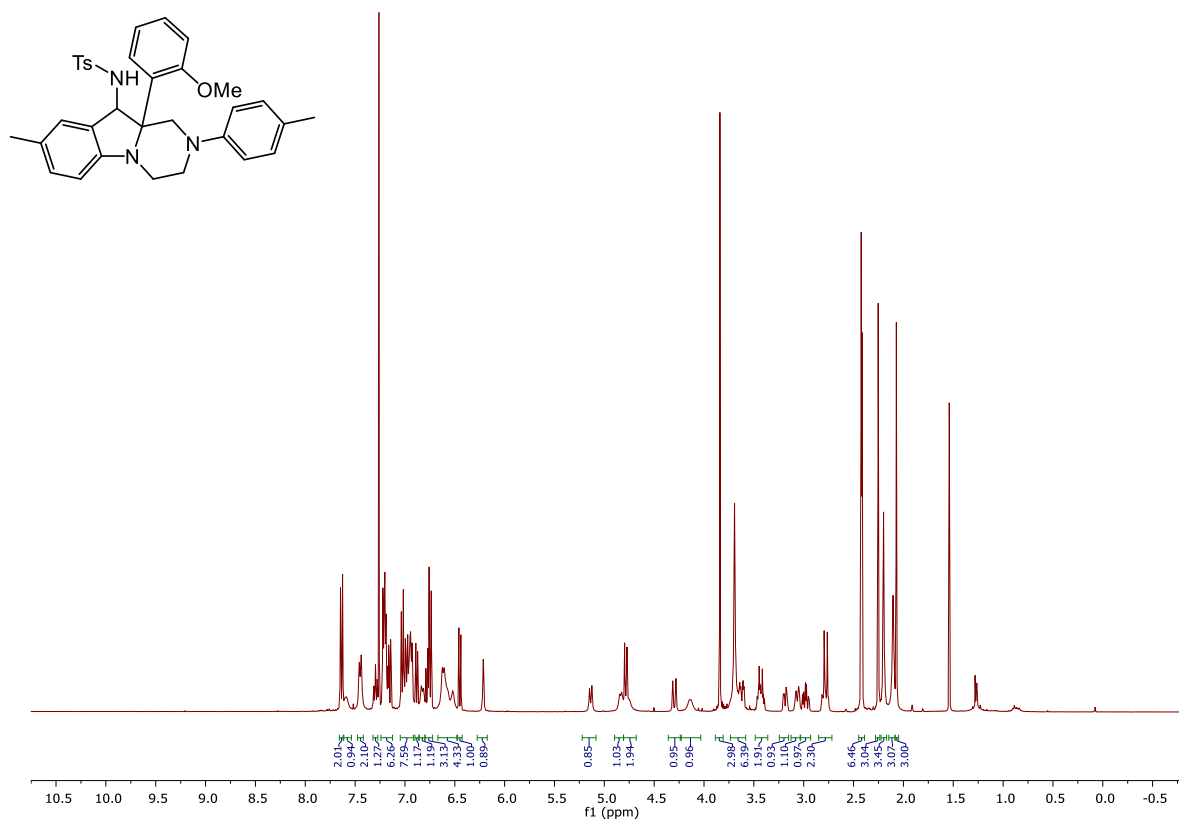

**Compound 3dA**  $^{13}\text{C}$  NMR ( $\text{CDCl}_3$ , 100 MHz)

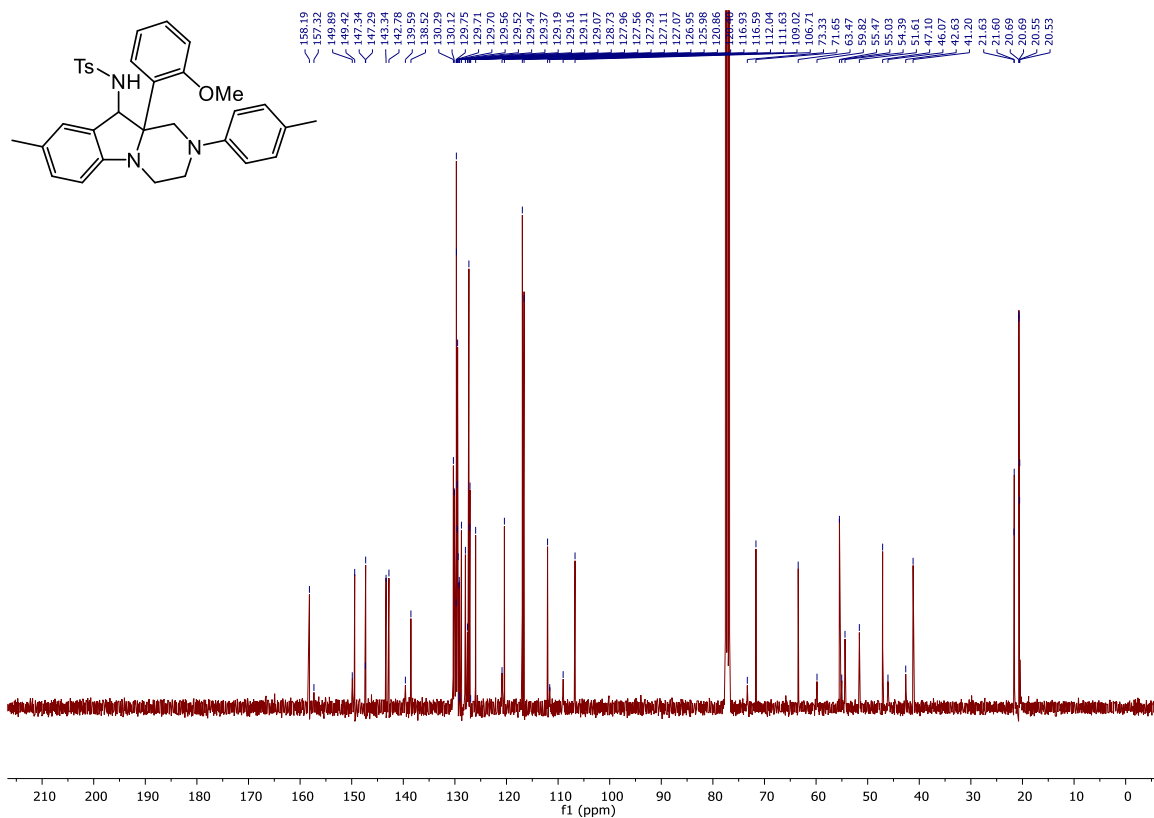

Compound 3eA'' <sup>1</sup>H NMR (CDCl<sub>3</sub>, 400 MHz)

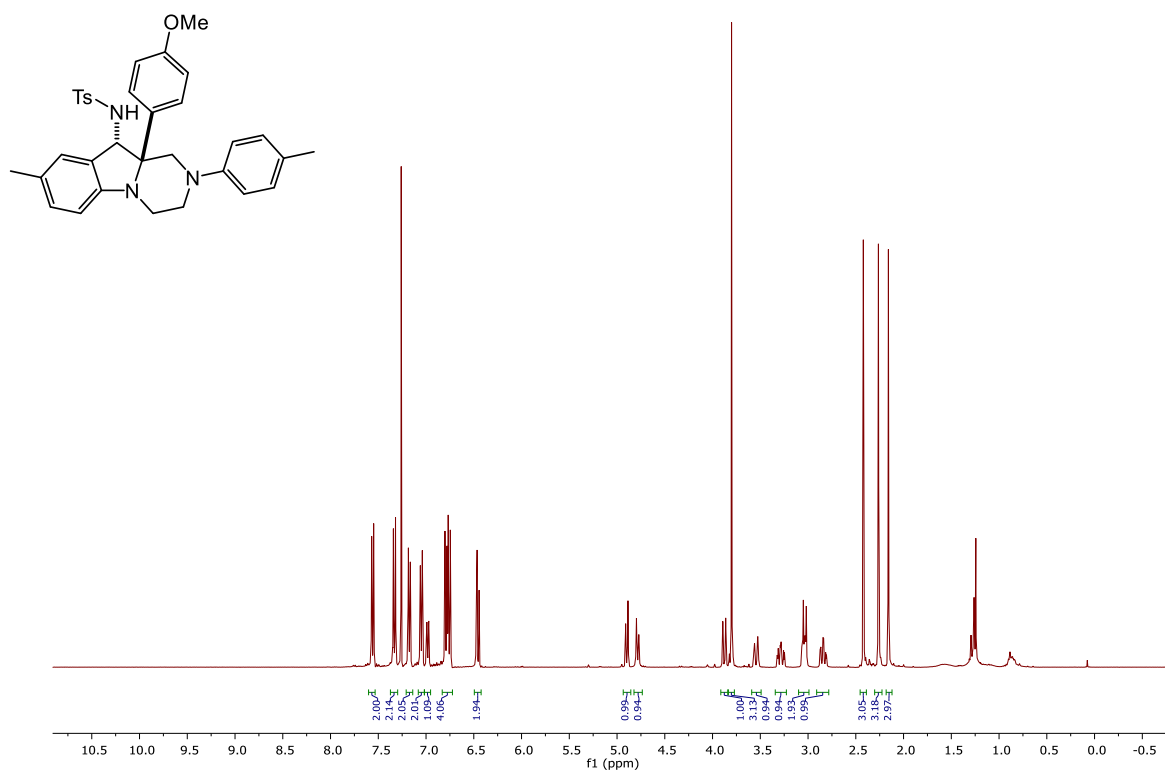

Compound 3eA'' <sup>13</sup>C NMR (CDCl<sub>3</sub>, 100 MHz)

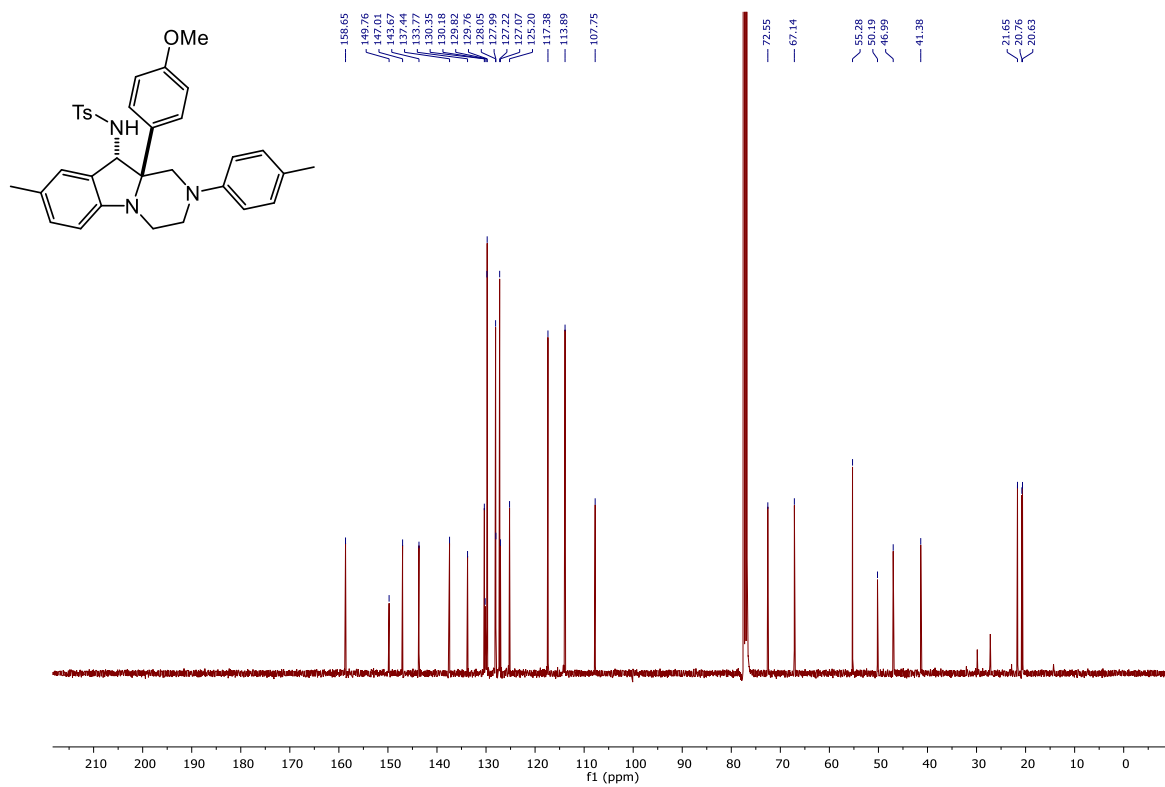



Compound 3eA' <sup>1</sup>H NMR (CDCl<sub>3</sub>, 400 MHz)

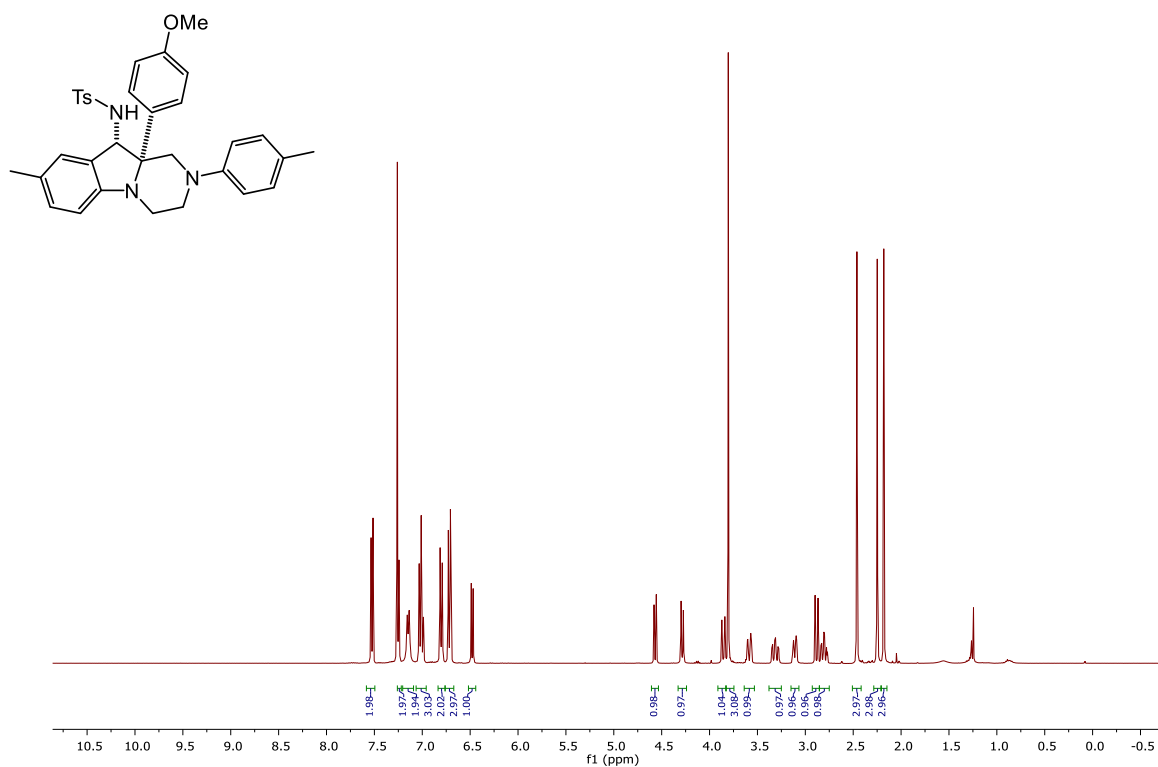

Compound 3eA' <sup>13</sup>C NMR (CDCl<sub>3</sub>, 100 MHz)

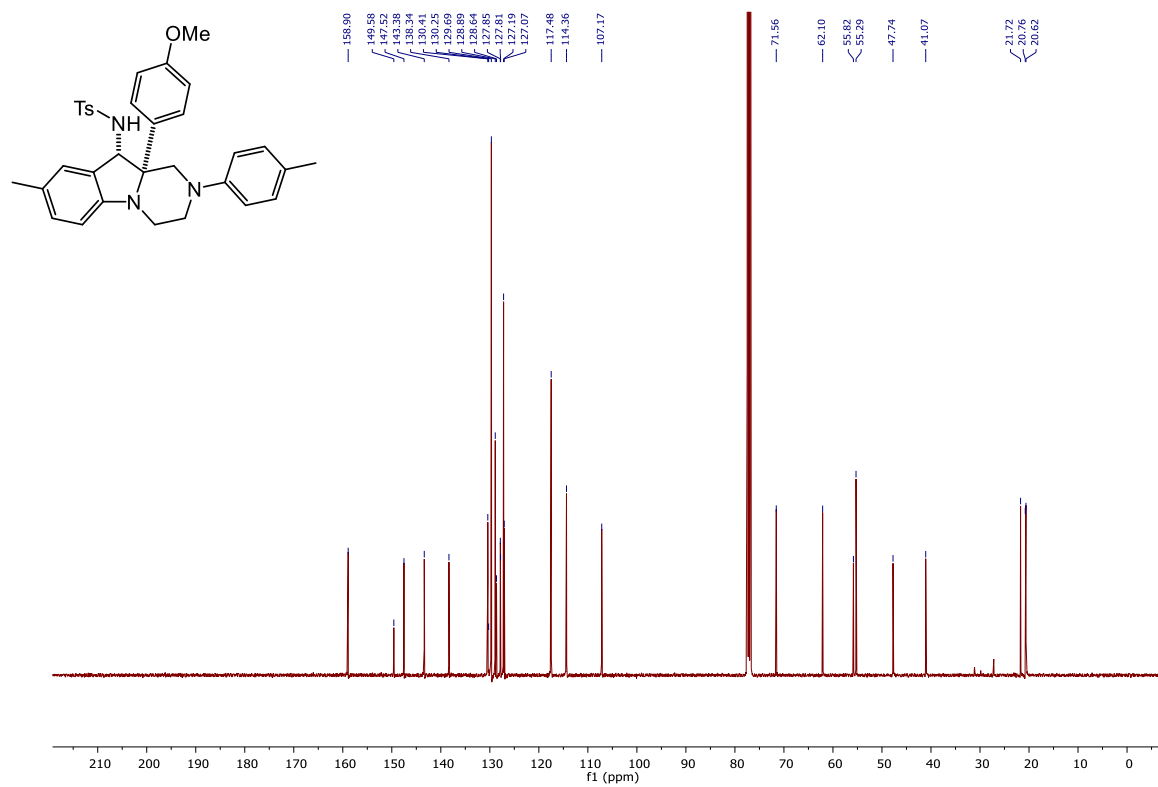

**Compound 3fa**  $^1\text{H}$  NMR ( $\text{CDCl}_3$ , 400 MHz)

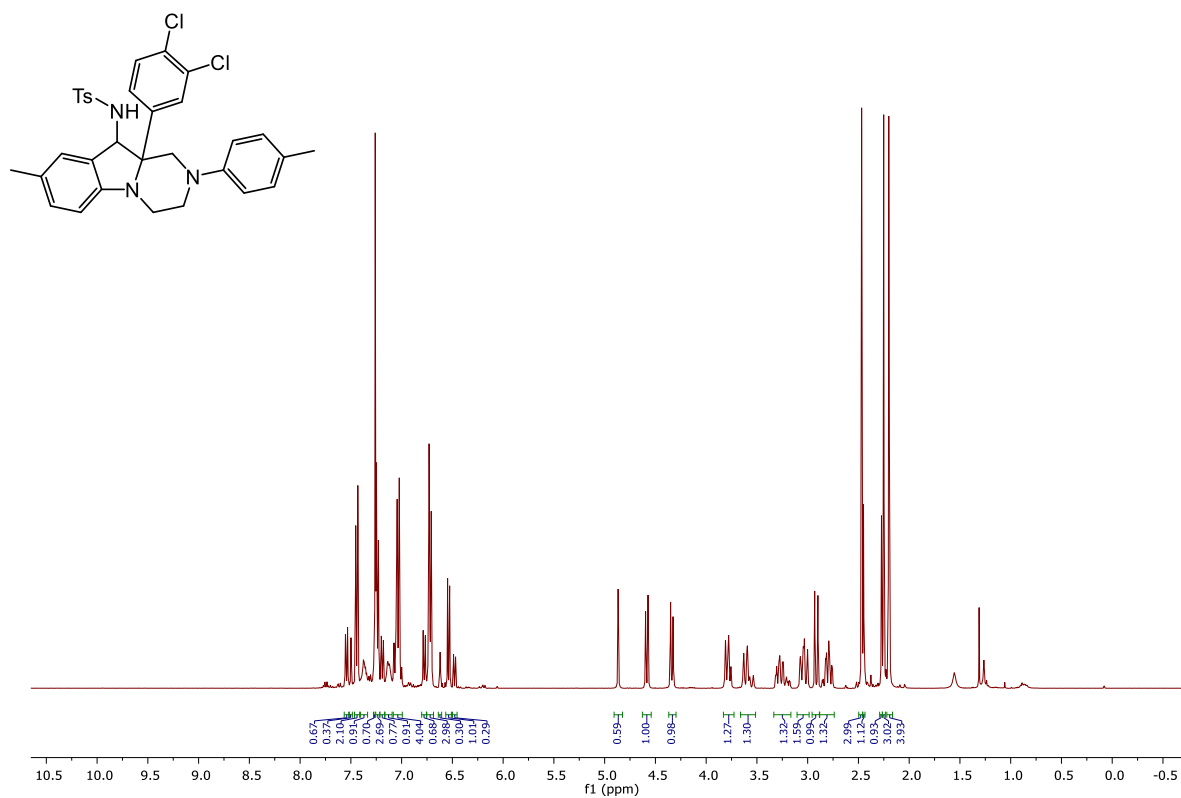

**Compound 3fa**  $^{13}\text{C}$  NMR ( $\text{CDCl}_3$ , 100 MHz)

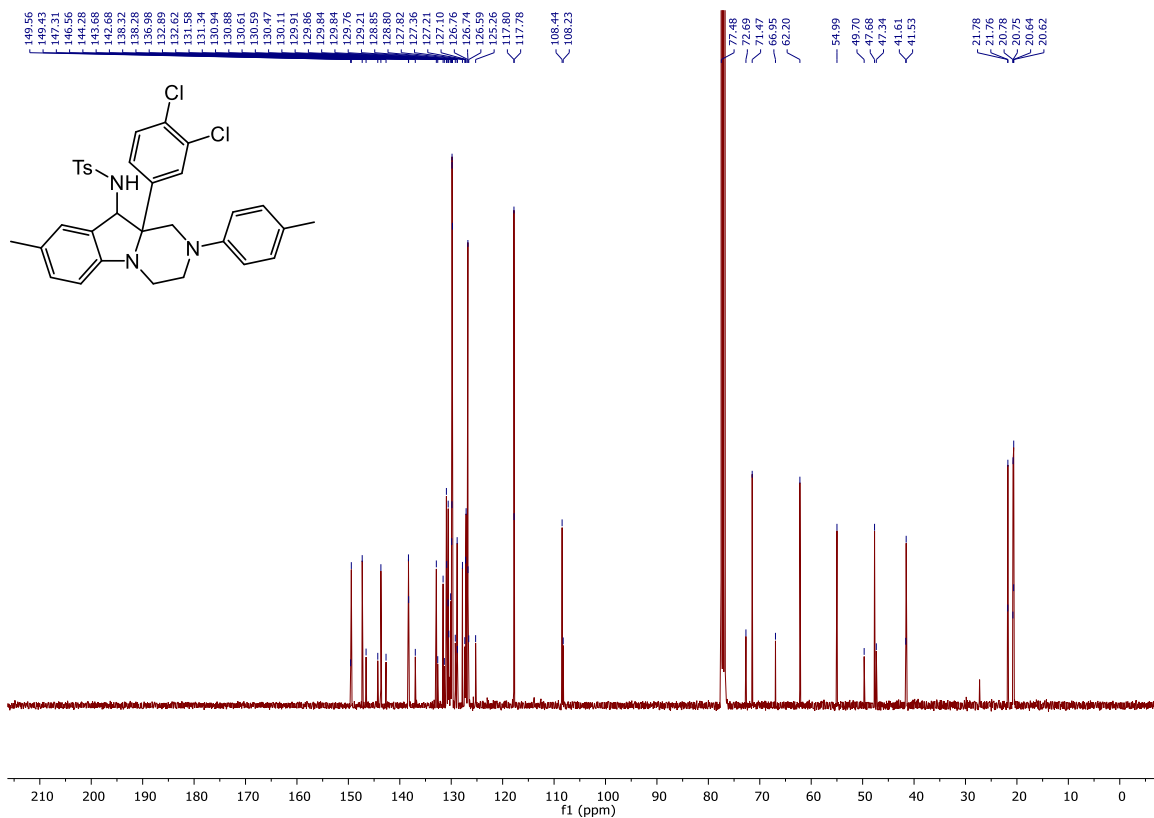

Compound 3gA'' <sup>1</sup>H NMR (CDCl<sub>3</sub>, 400 MHz)

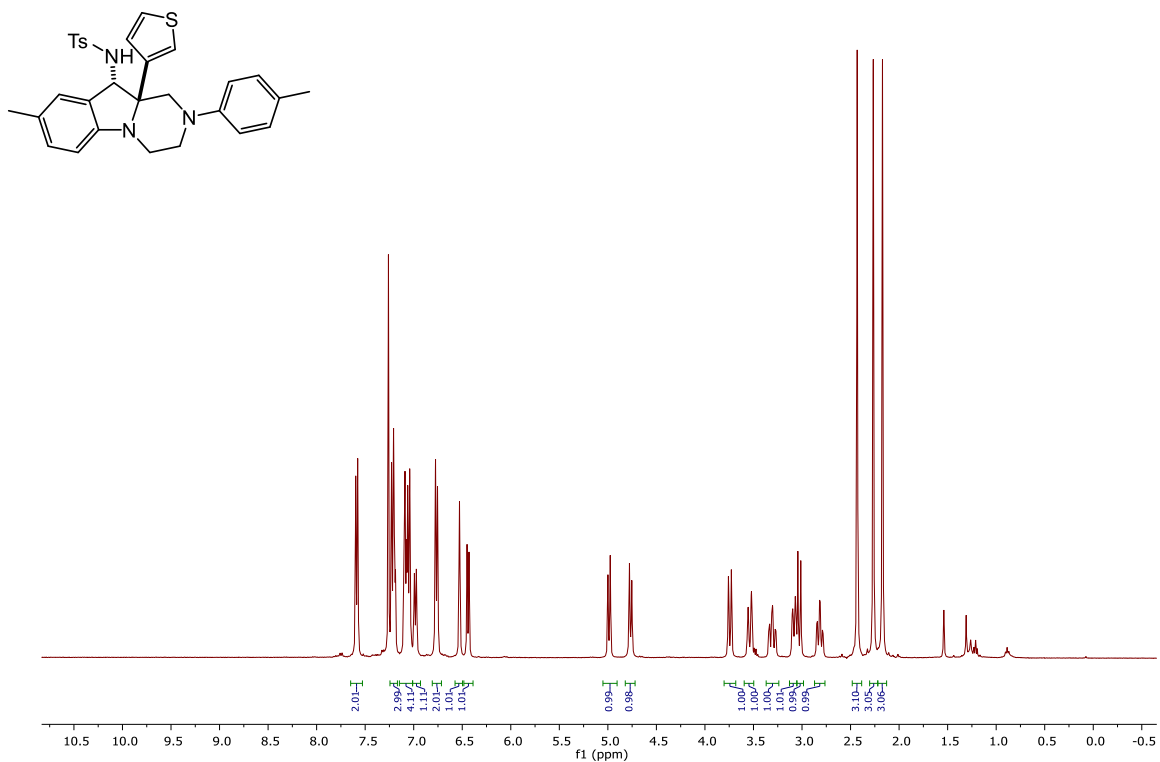

Compound 3gA'' <sup>13</sup>C NMR (CDCl<sub>3</sub>, 100 MHz)

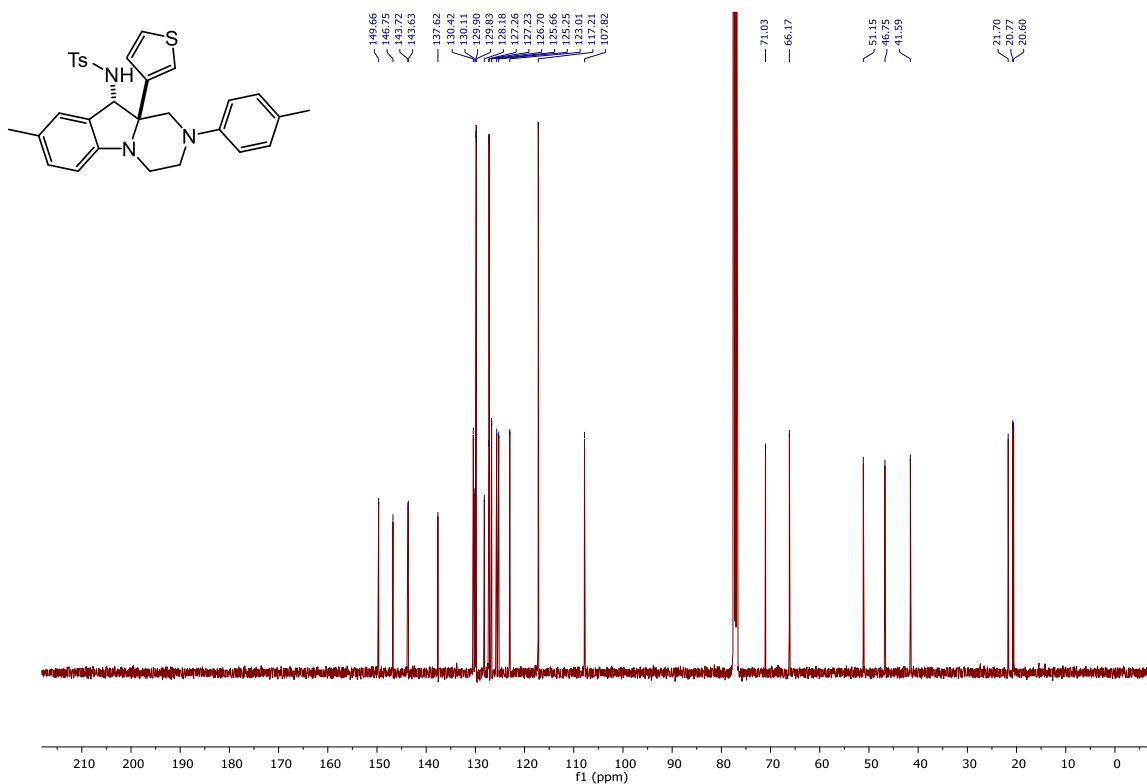

Compound 3gA' <sup>1</sup>H NMR (CDCl<sub>3</sub>, 400 MHz)

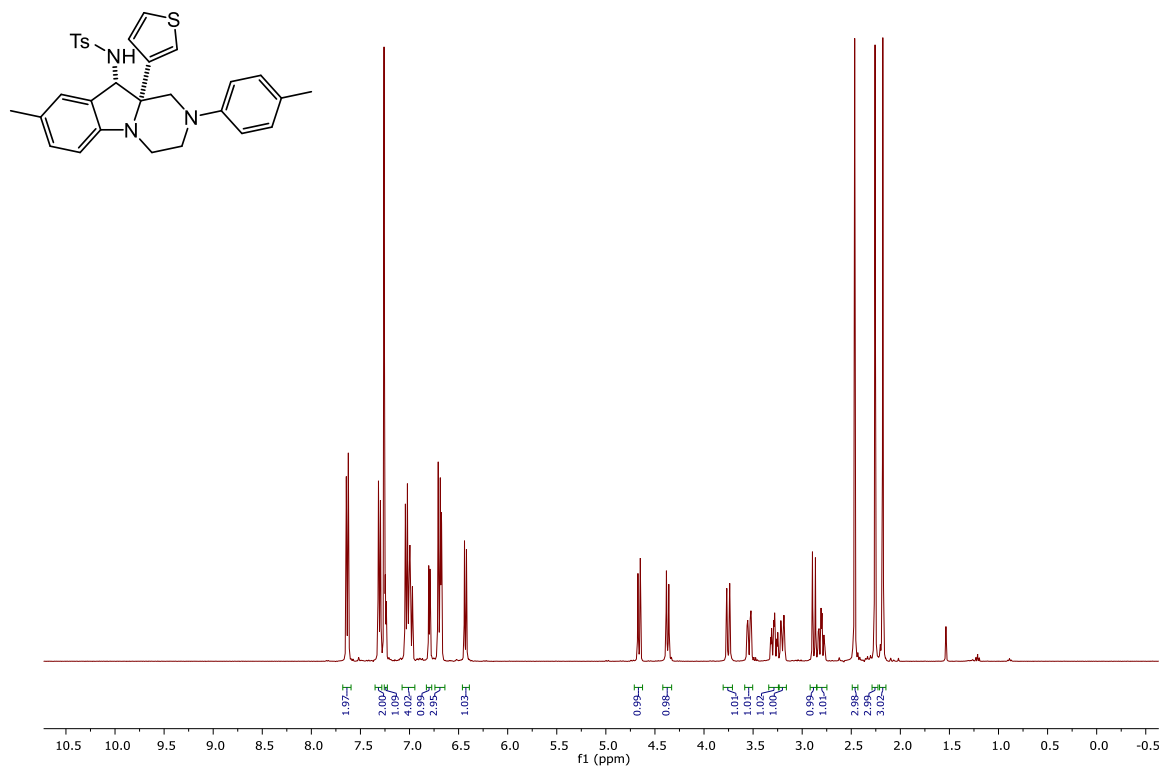

Compound 3gA' <sup>13</sup>C NMR (CDCl<sub>3</sub>, 100 MHz)

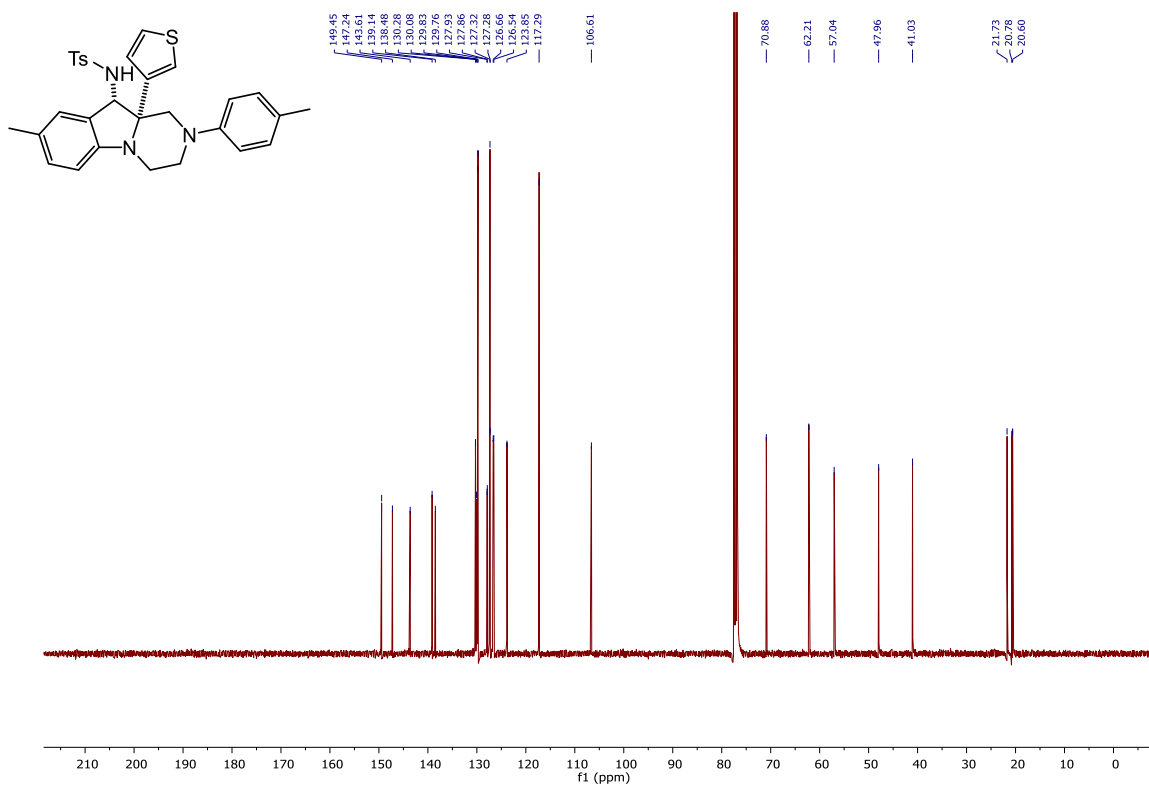

Compound 3hA'' <sup>1</sup>H NMR (CDCl<sub>3</sub>, 500 MHz)

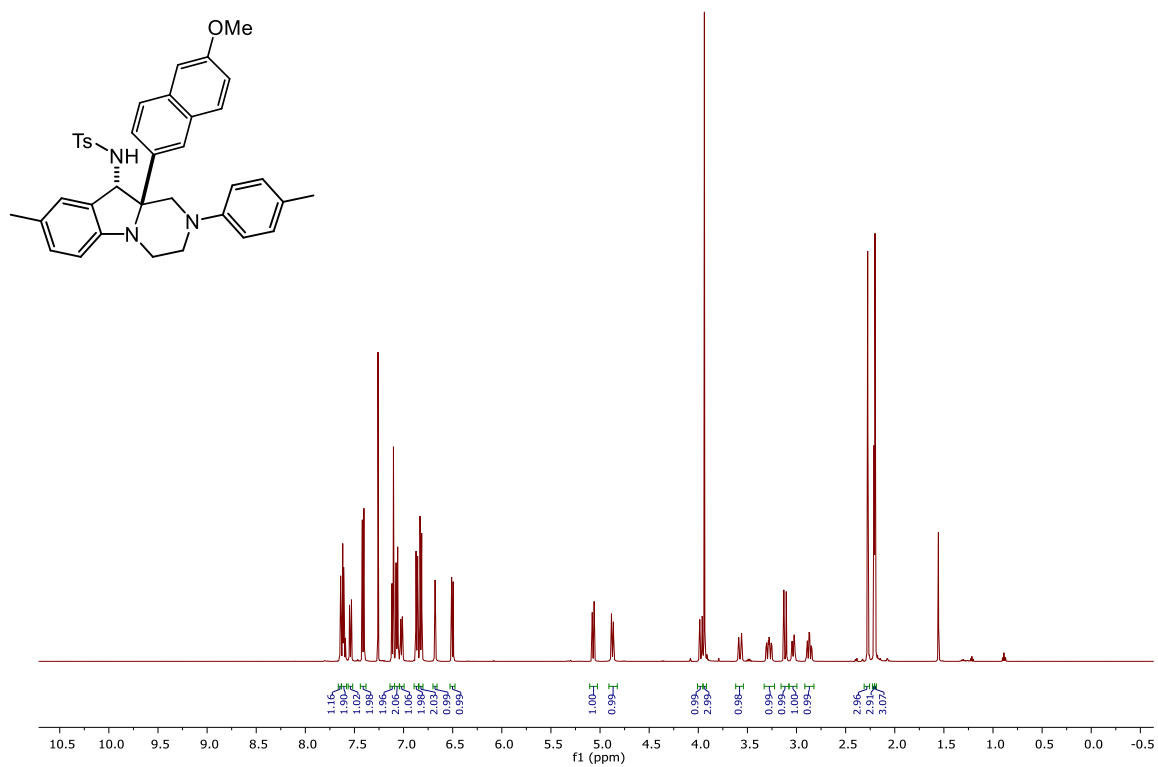

Compound 3hA'' <sup>13</sup>C NMR (CDCl<sub>3</sub>, 126 MHz)

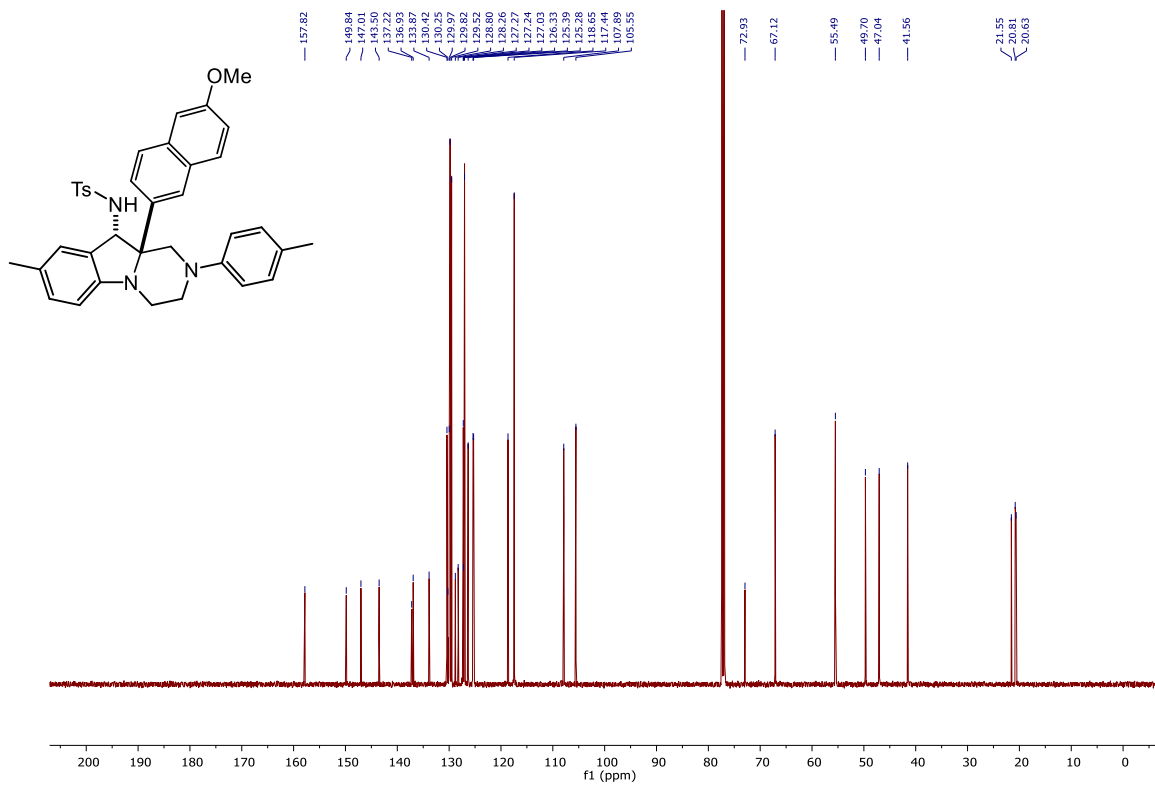

Compound 3hA' <sup>1</sup>H NMR (CDCl<sub>3</sub>, 400 MHz)

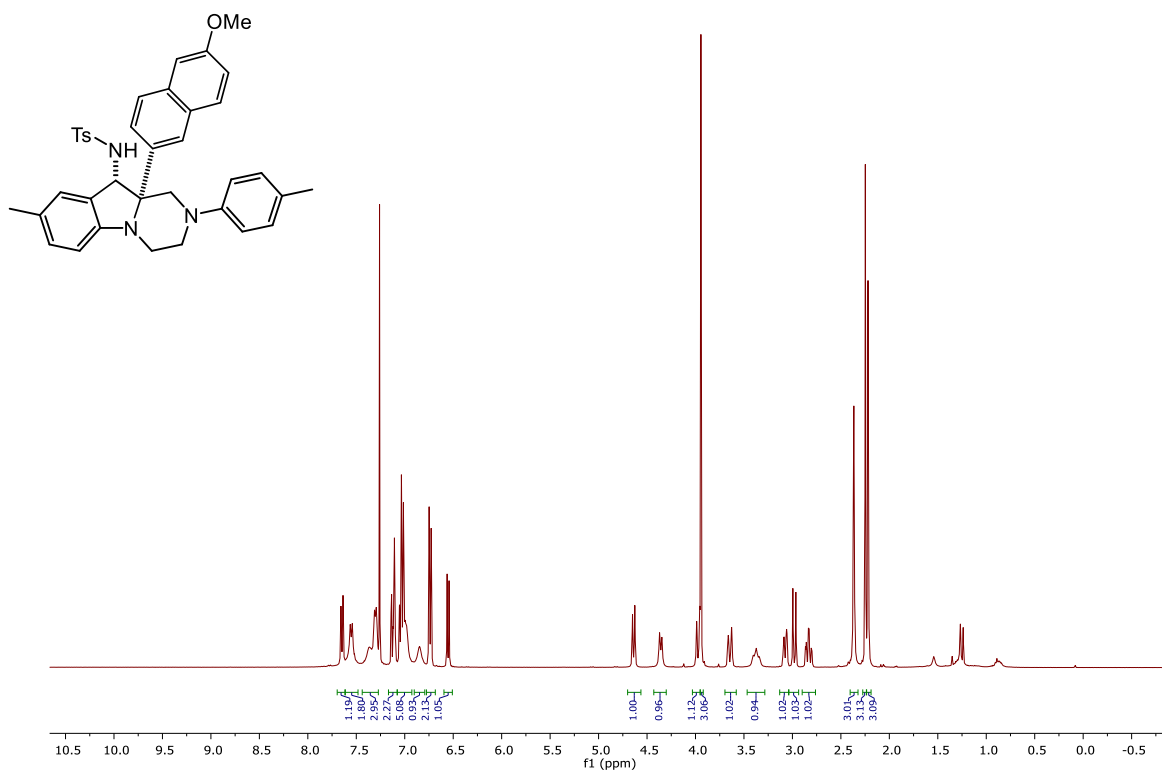

Compound 3hA' <sup>13</sup>C NMR (CDCl<sub>3</sub>, 100 MHz)

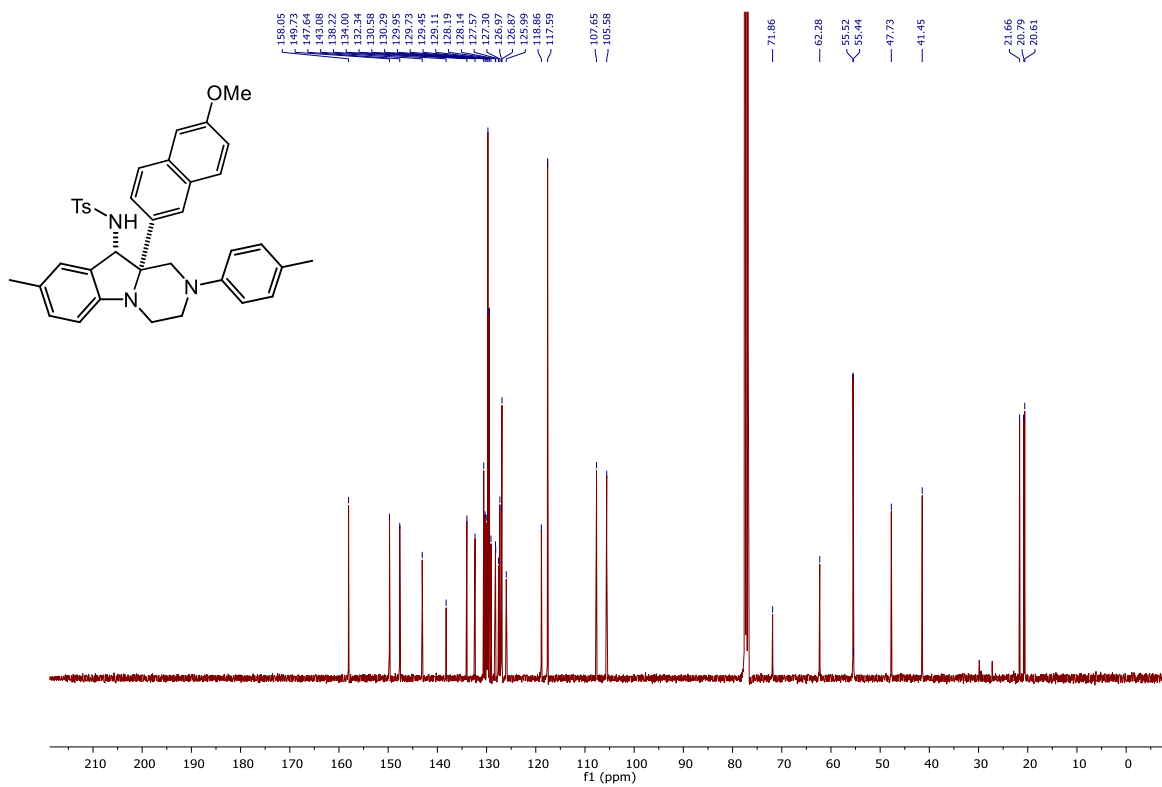

**Compound 3aB**  $^1\text{H}$  NMR ( $\text{CDCl}_3$ , 400 MHz)

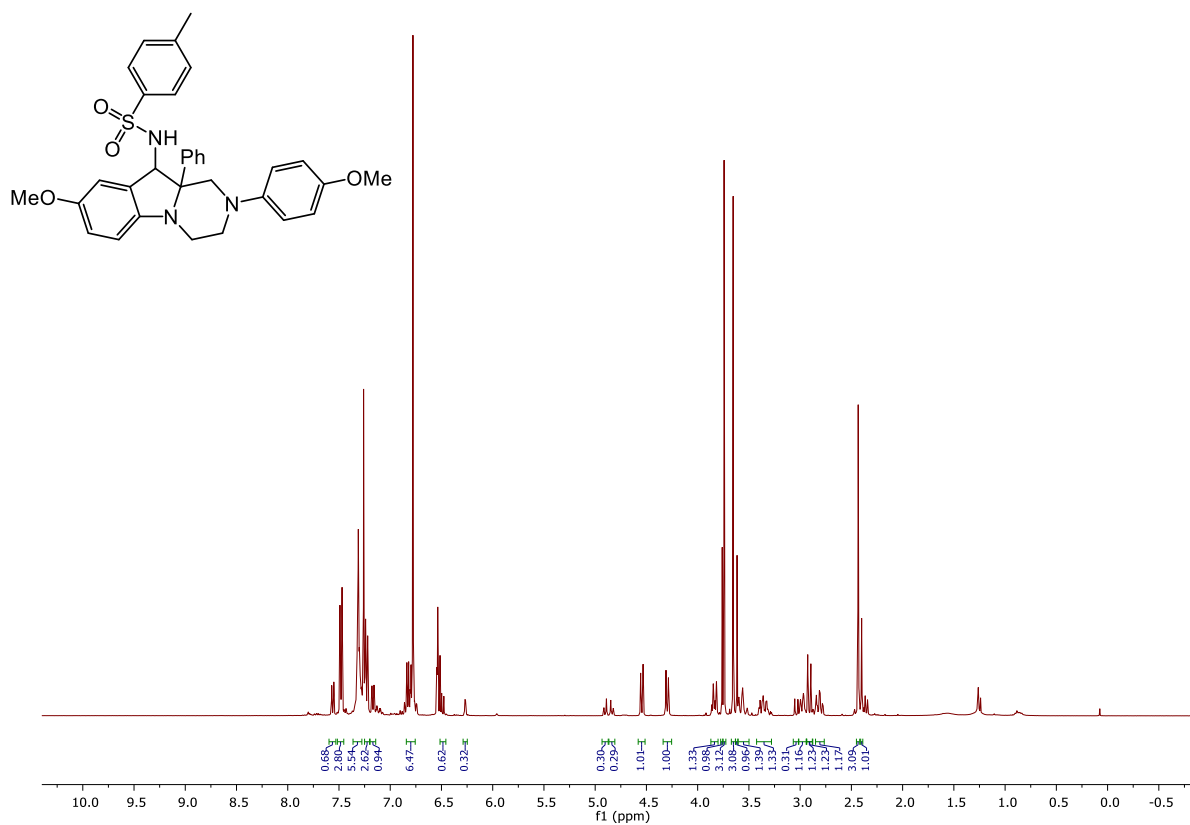

**Compound 3aB**  $^{13}\text{C}$  NMR ( $\text{CDCl}_3$ , 100 MHz)

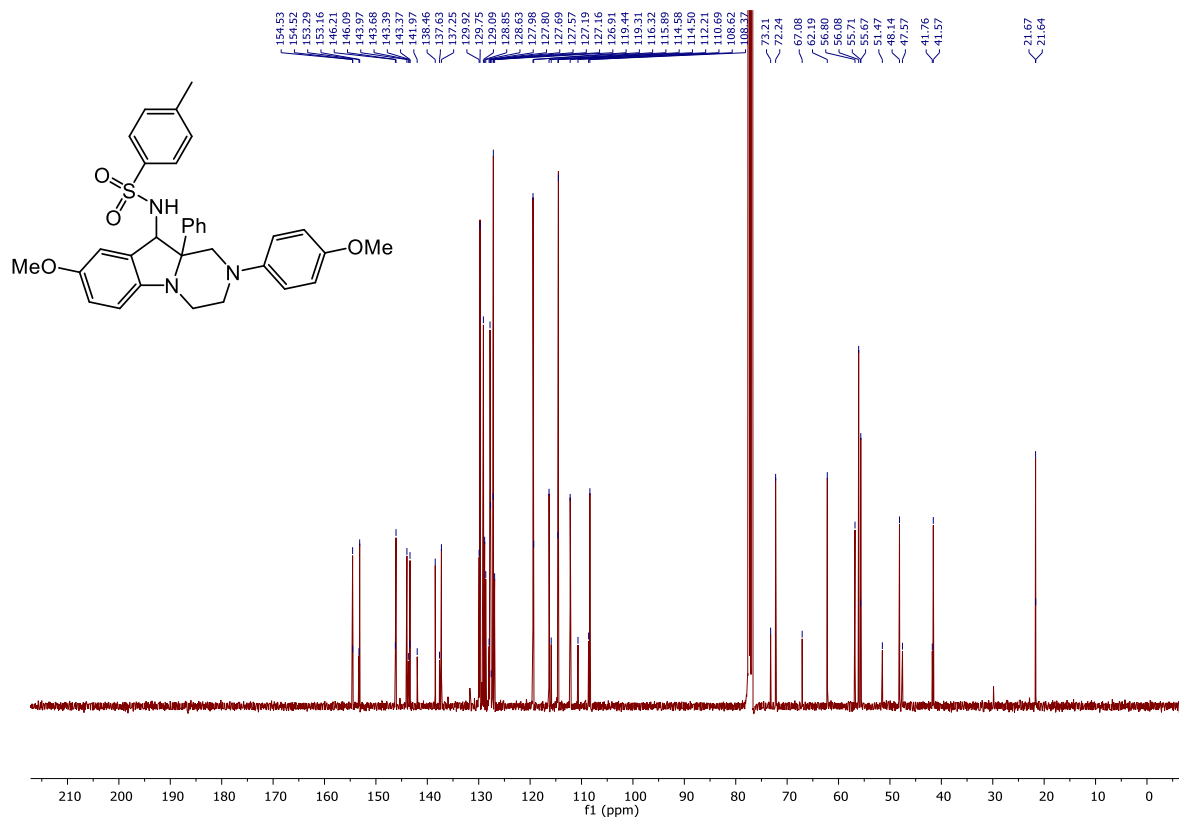





Compound 3aC' <sup>1</sup>H NMR (CDCl<sub>3</sub>, 400 MHz)

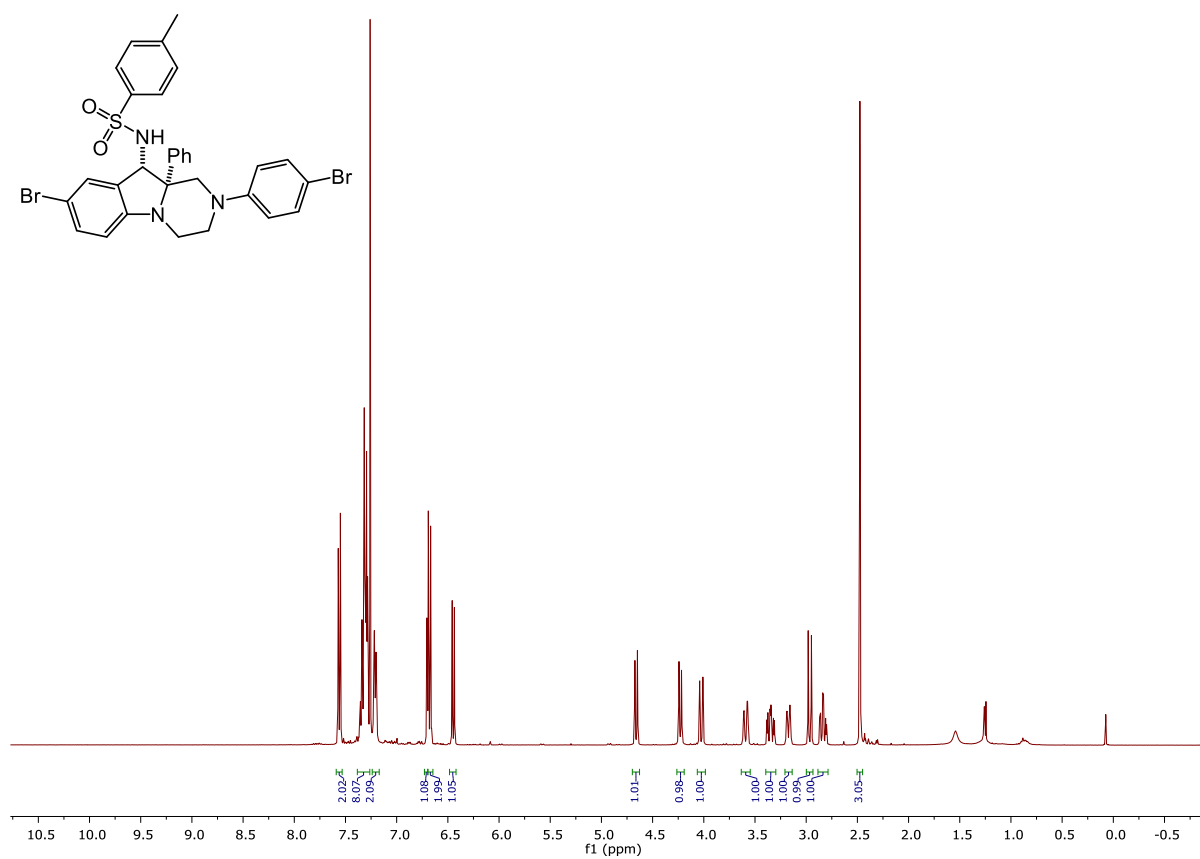

Compound 3aC' <sup>13</sup>C NMR (CDCl<sub>3</sub>, 100 MHz)

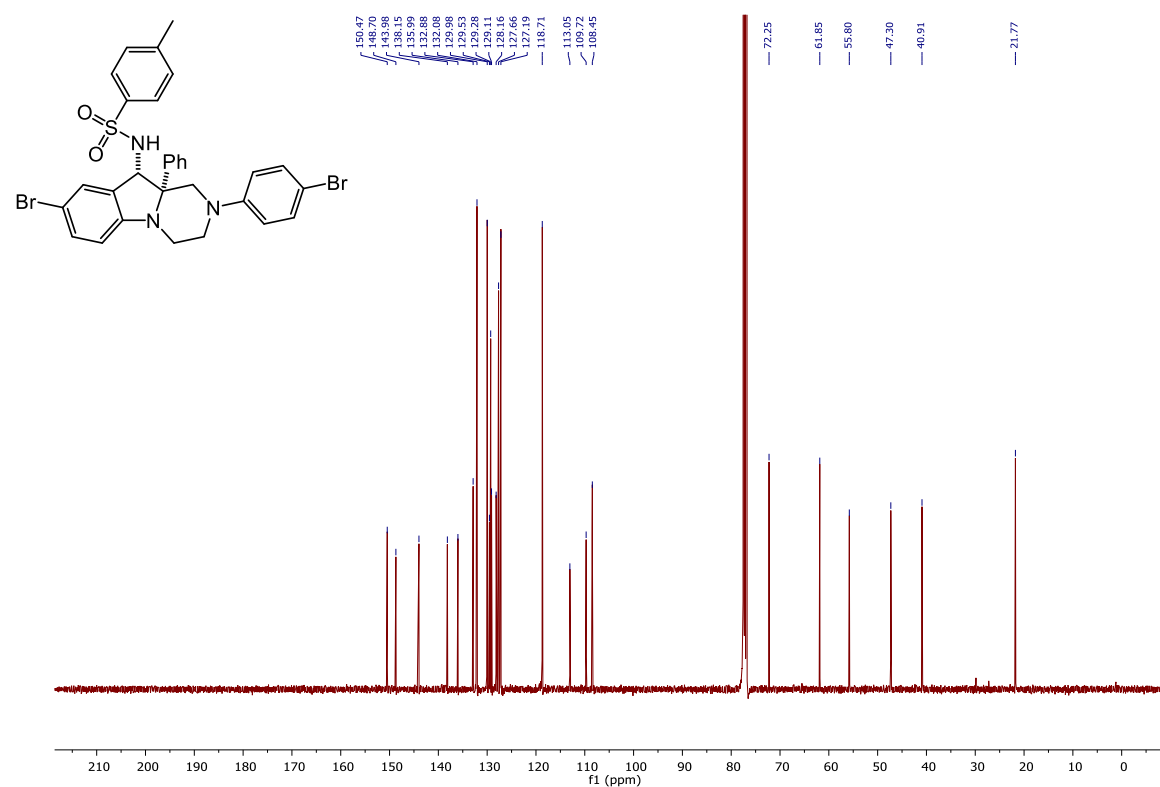

Compound 3aD'' <sup>1</sup>H NMR (CDCl<sub>3</sub>, 400 MHz)

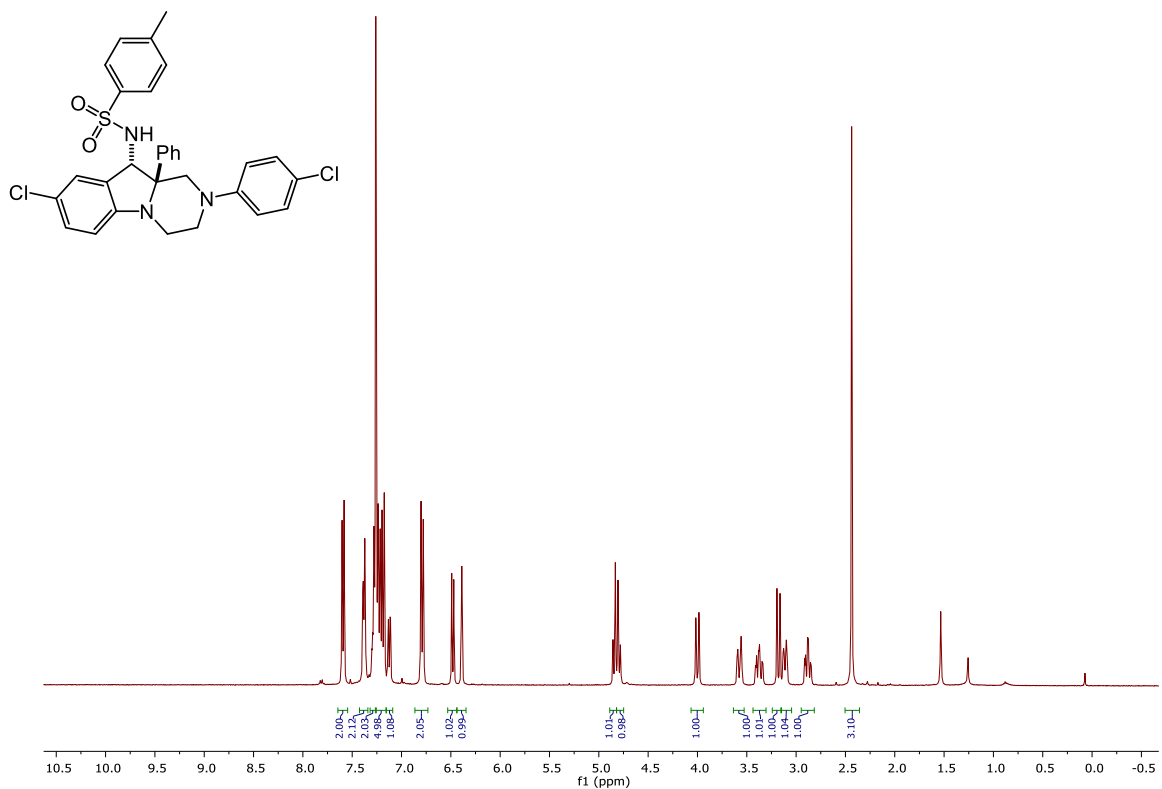

Compound 3aD'' <sup>13</sup>C NMR (CDCl<sub>3</sub>, 100 MHz)

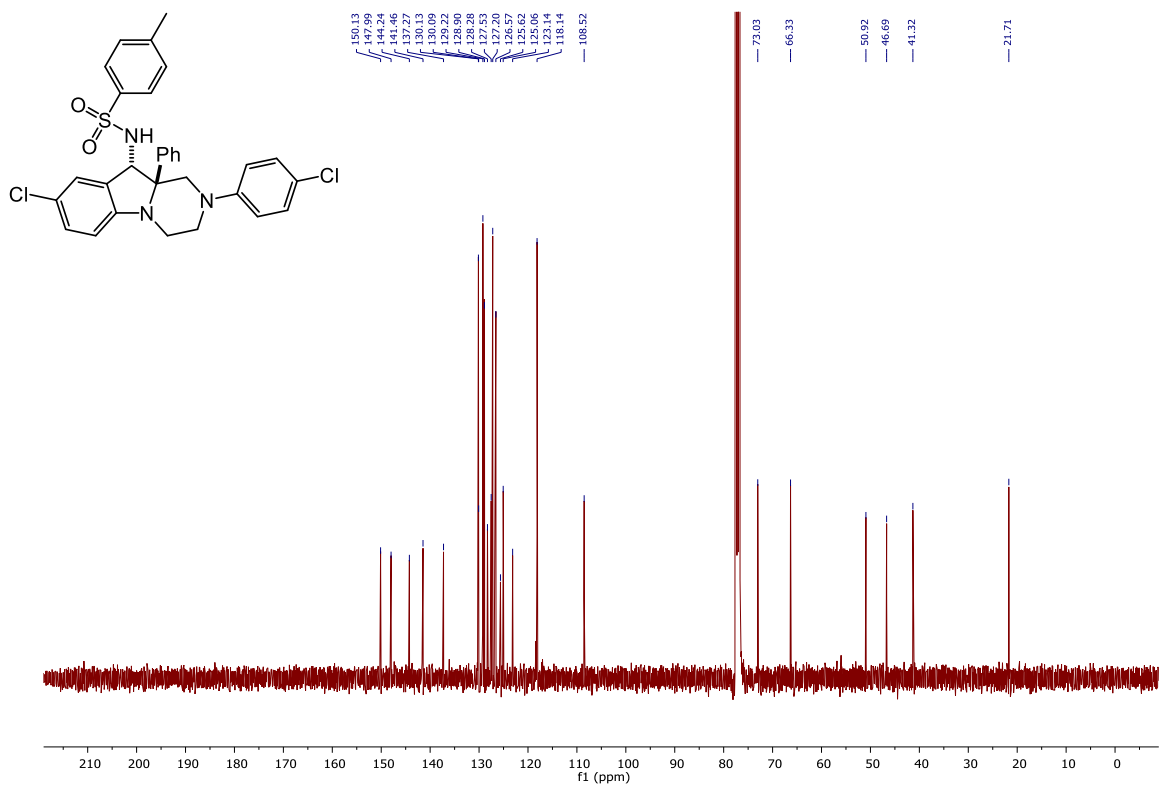

Compound 3aD' <sup>1</sup>H NMR (CDCl<sub>3</sub>, 400 MHz)

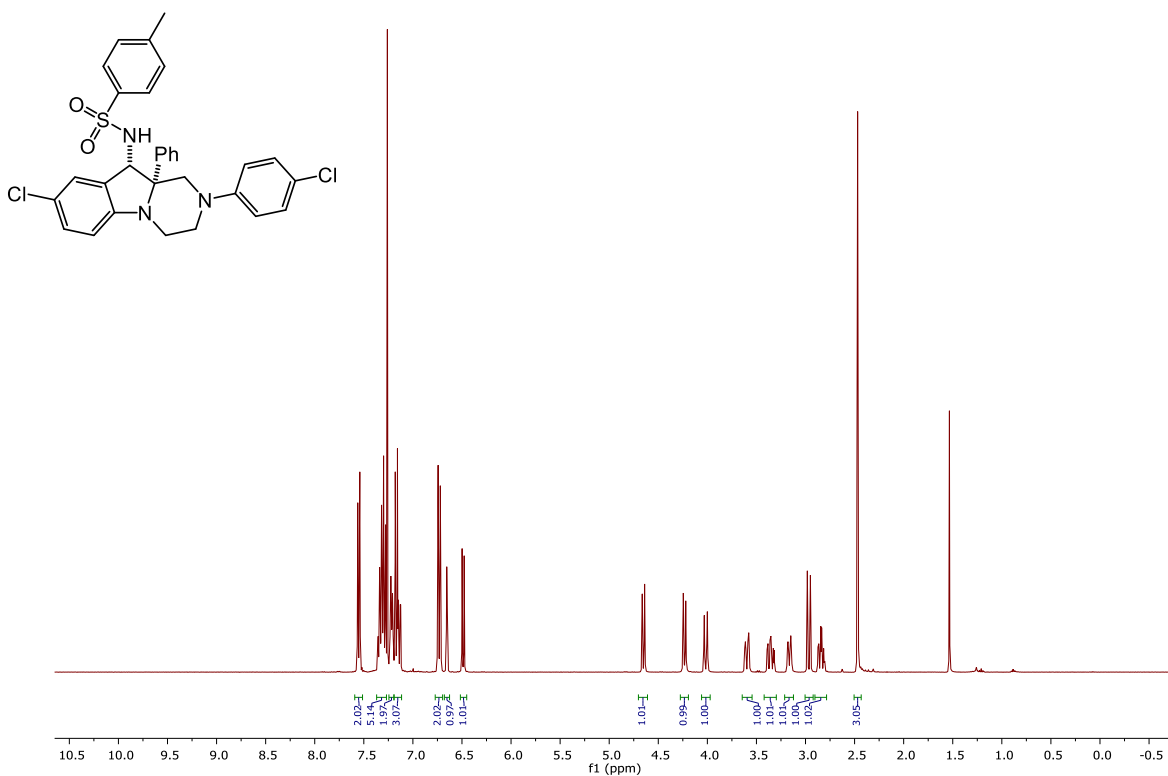

Compound 3aD' <sup>13</sup>C NMR (CDCl<sub>3</sub>, 100 MHz)

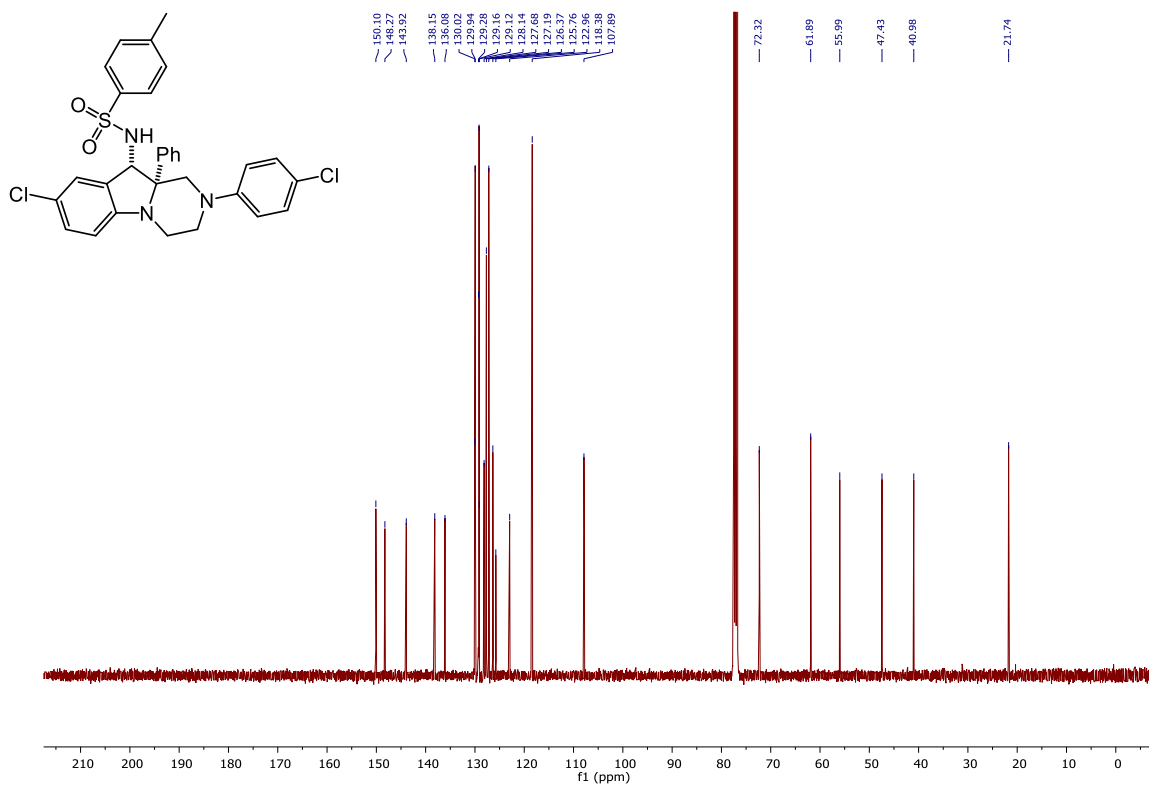

Compound 4aE <sup>1</sup>H NMR (CDCl<sub>3</sub>, 400 MHz)

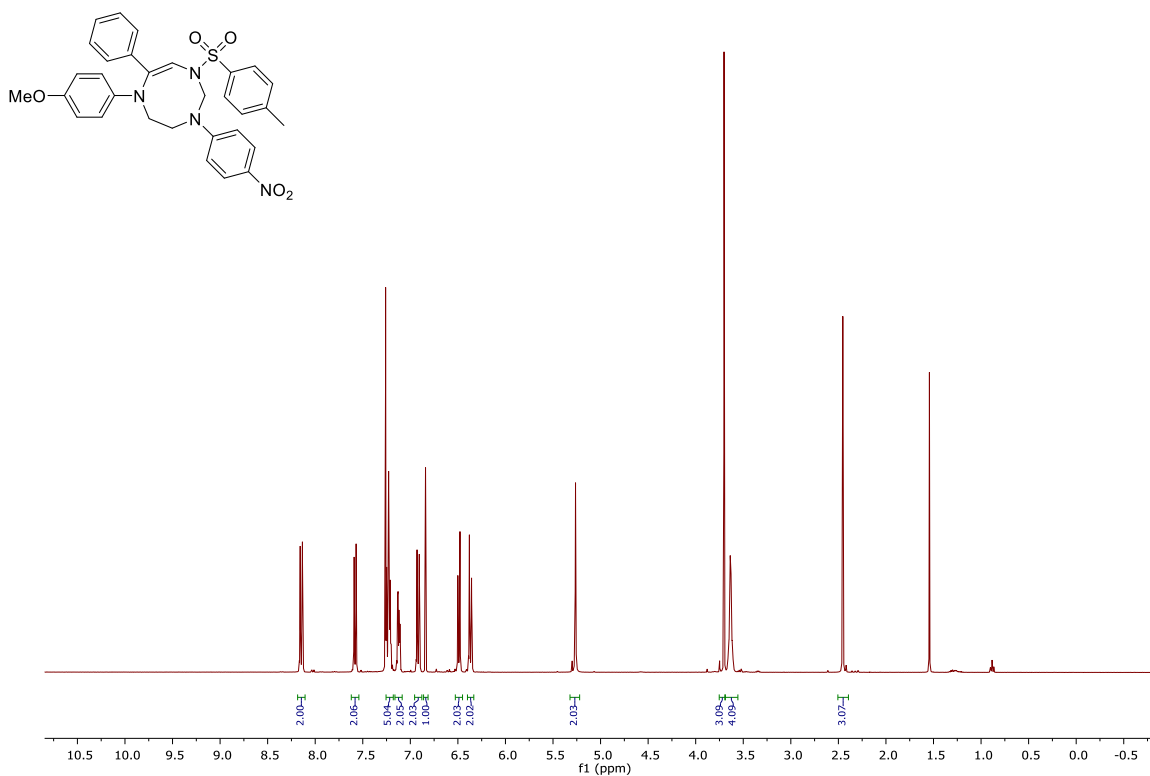

Compound 4aE <sup>13</sup>C NMR (CDCl<sub>3</sub>, 100 MHz)

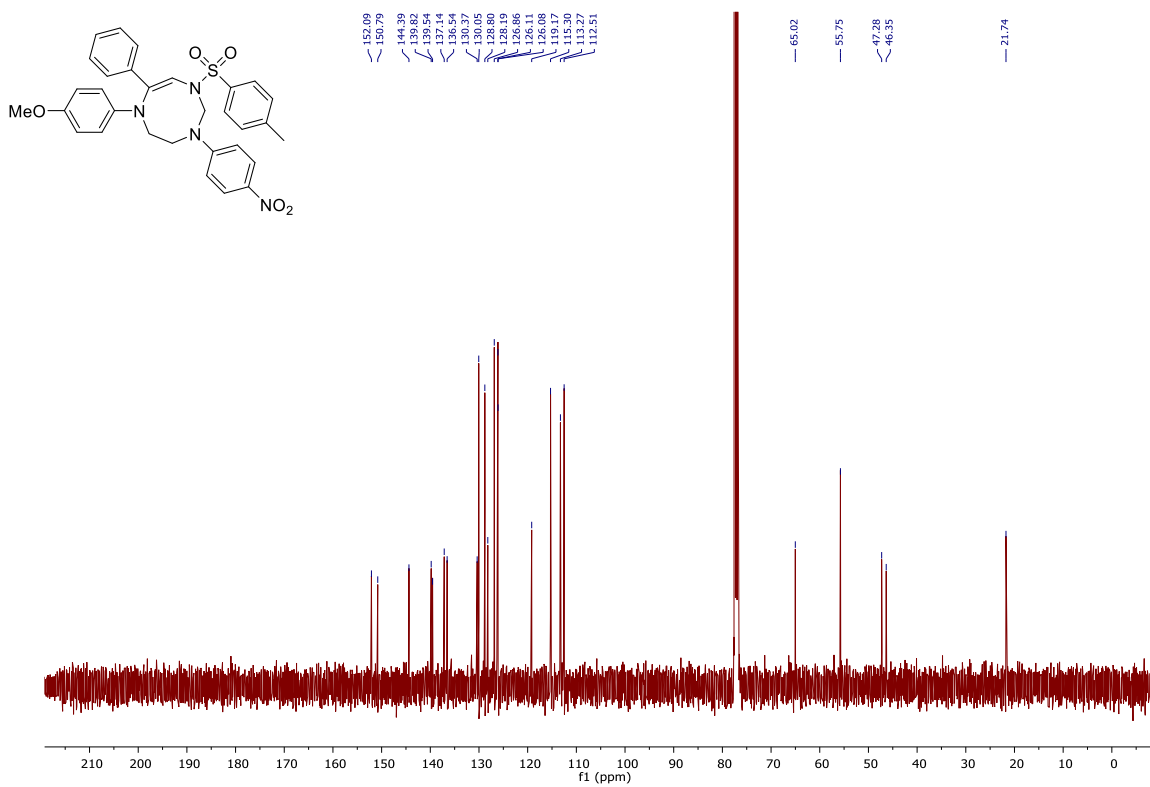

### Compound 4eE <sup>1</sup>H NMR (CD<sub>2</sub>Cl<sub>2</sub>, 400 MHz)

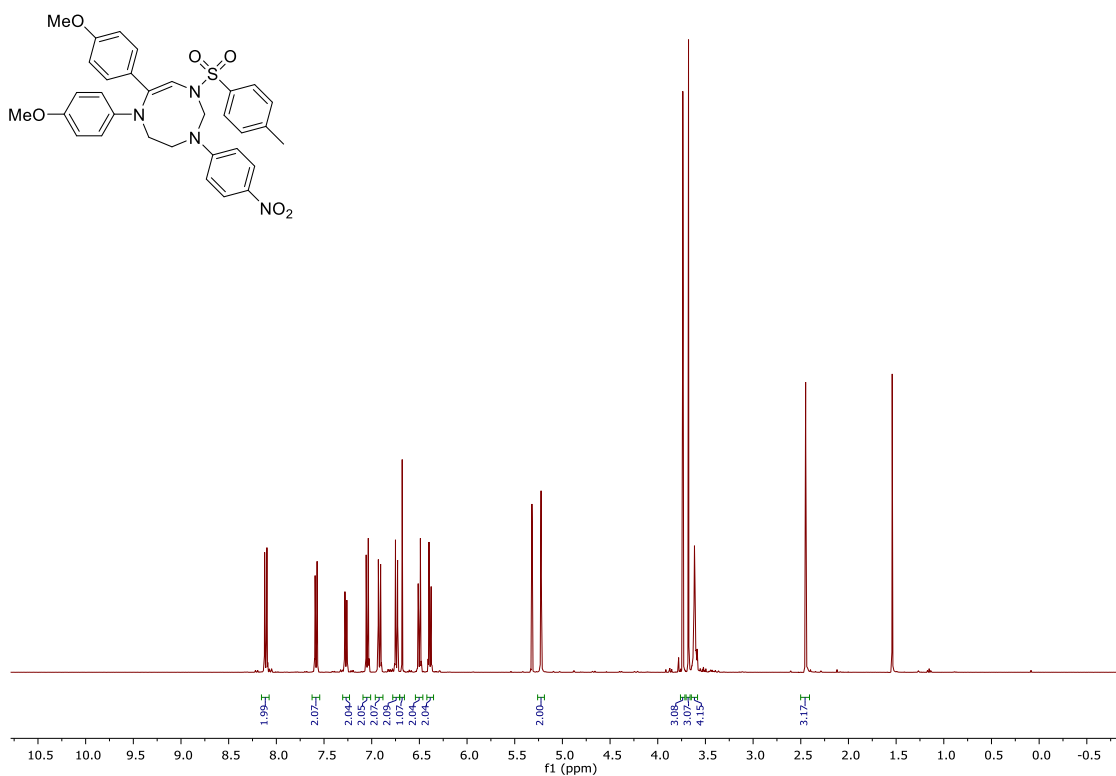

### Compound 4eE <sup>13</sup>C NMR (CD<sub>2</sub>Cl<sub>2</sub>, 100 MHz)

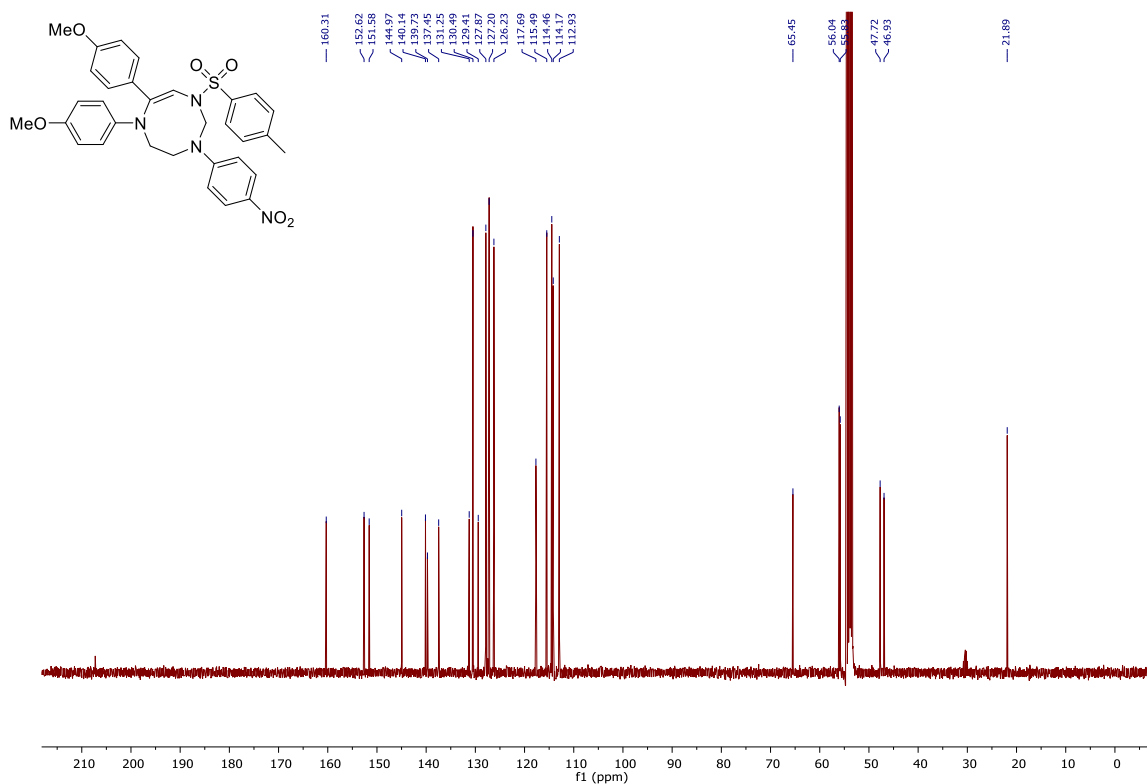

Compound 4iE <sup>1</sup>H NMR (CD<sub>2</sub>Cl<sub>2</sub>, 400 MHz)

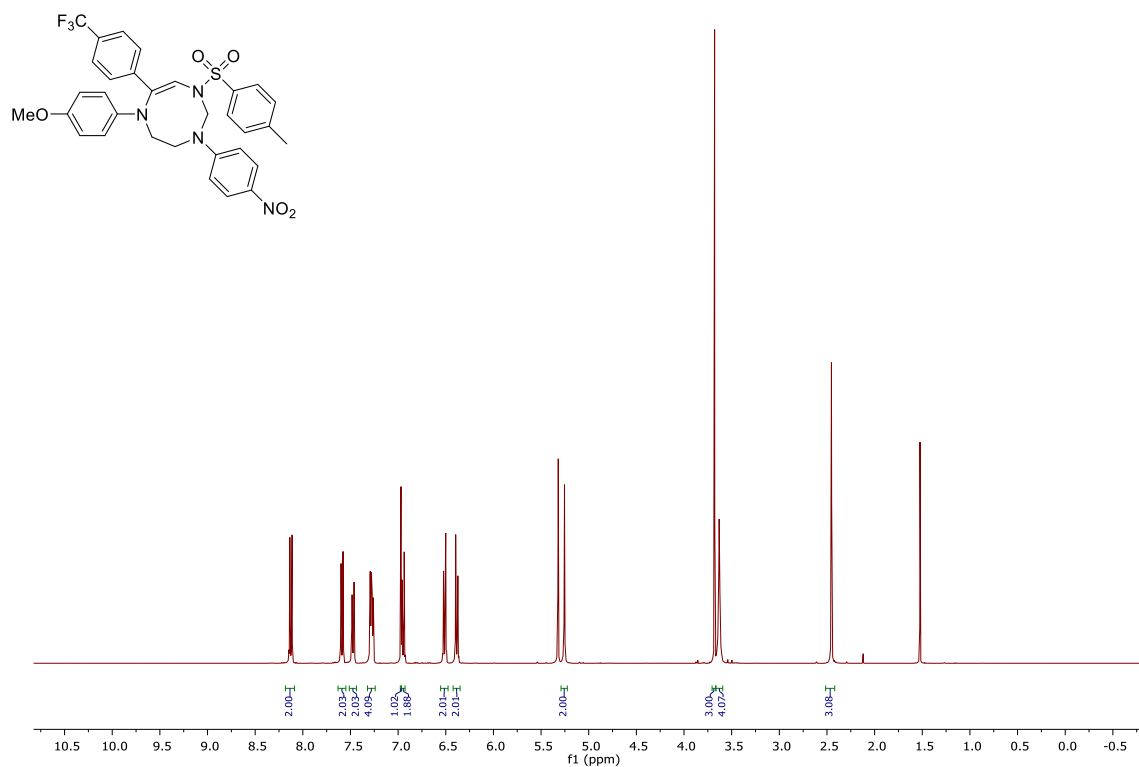

Compound 4iE <sup>13</sup>C NMR (CD<sub>2</sub>Cl<sub>2</sub>, 100 MHz)

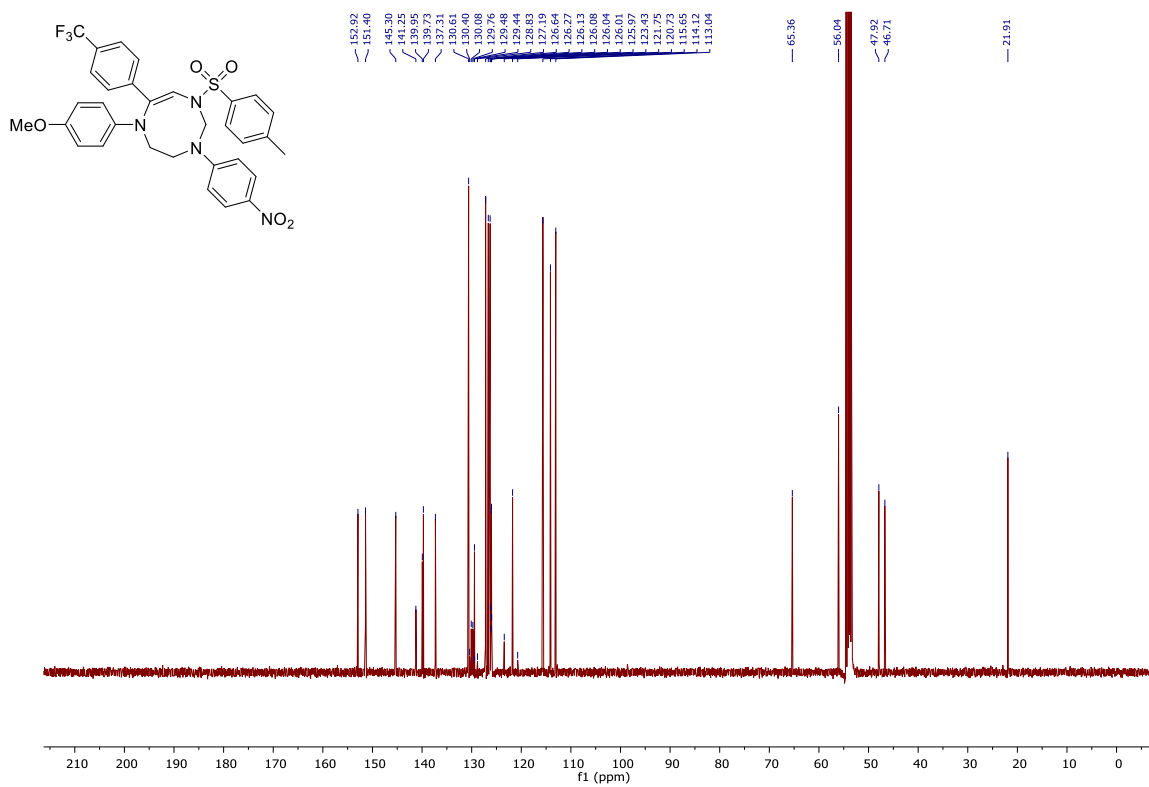

Compound 4iE  $^{19}\text{F}$  NMR ( $\text{CD}_2\text{Cl}_2$ , 282 MHz)

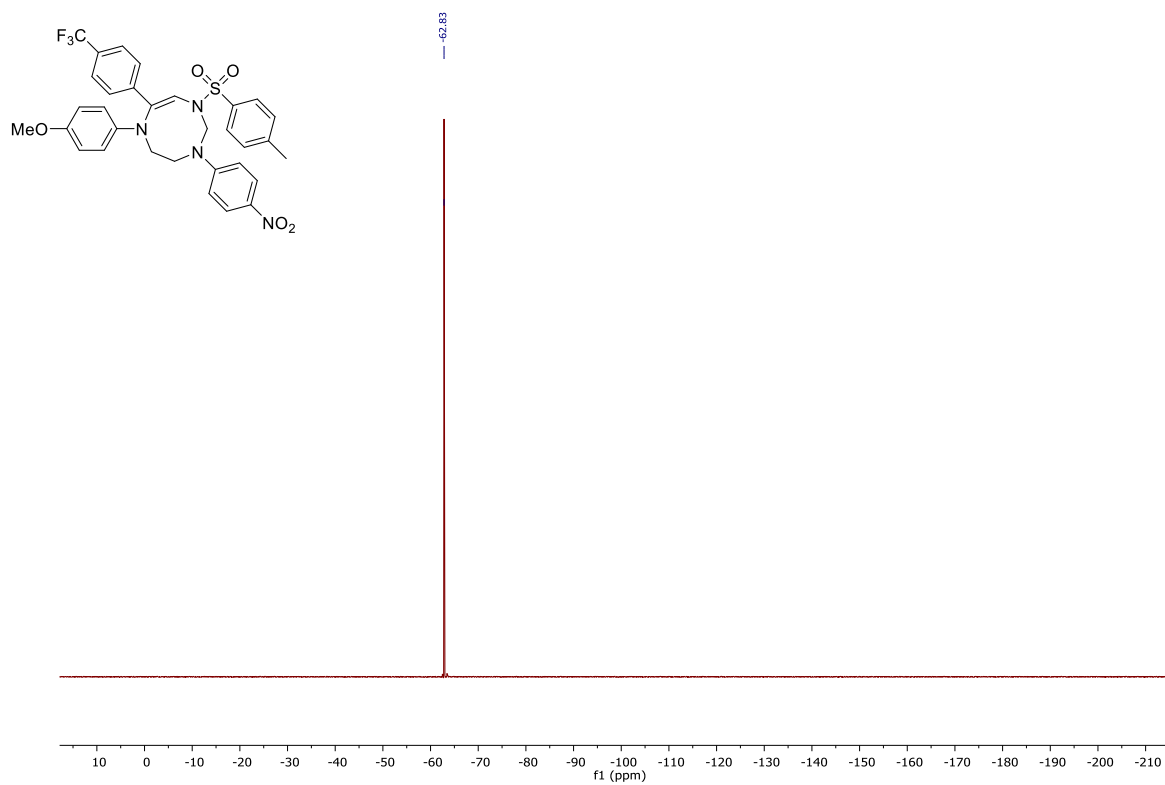

Compound 3A <sup>1</sup>H NMR (CDCl<sub>3</sub>, 400 MHz)

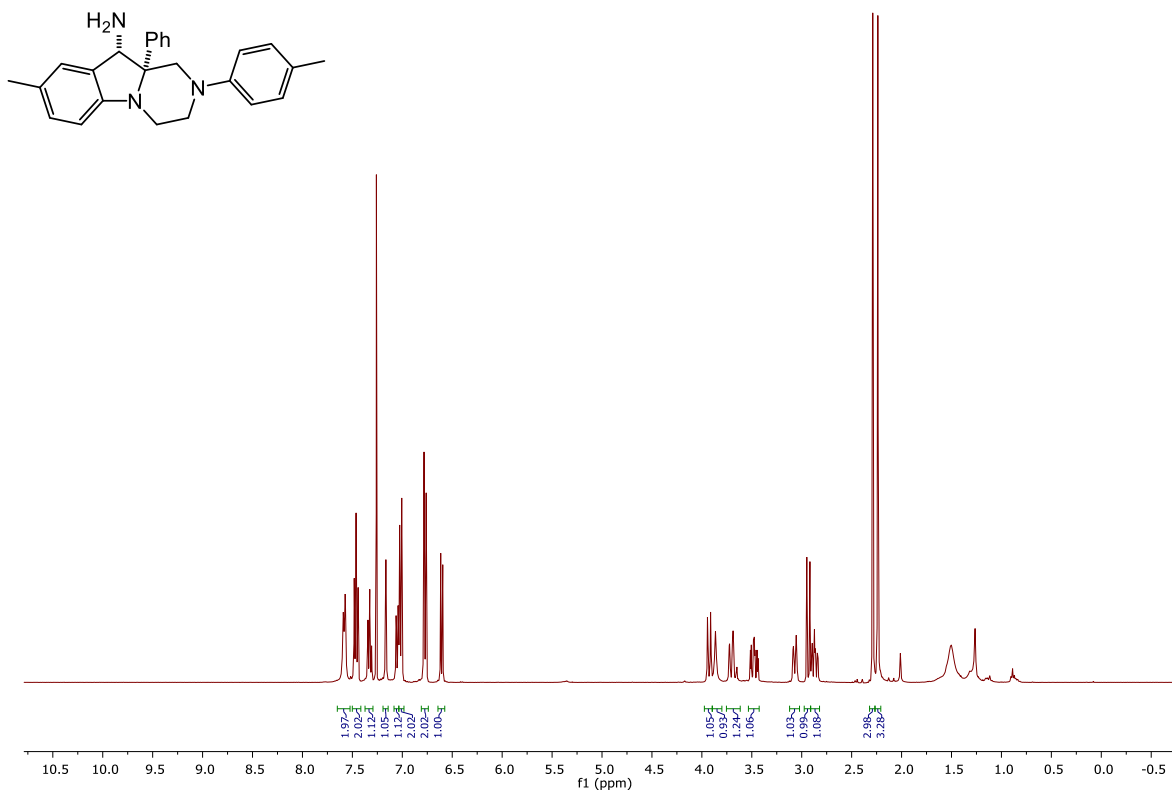

Compound 3A <sup>13</sup>C NMR (CDCl<sub>3</sub>, 100 MHz)

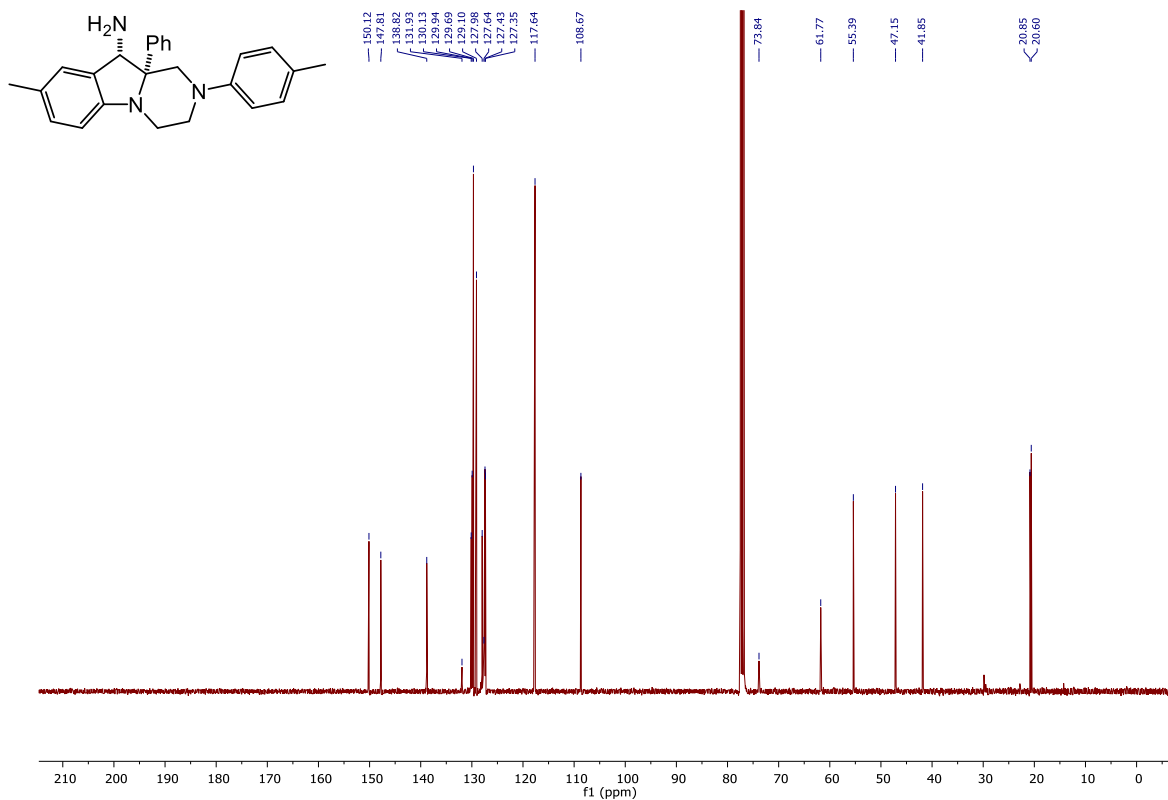



Compound 5aA <sup>1</sup>H NMR (CDCl<sub>3</sub>, 400 MHz)

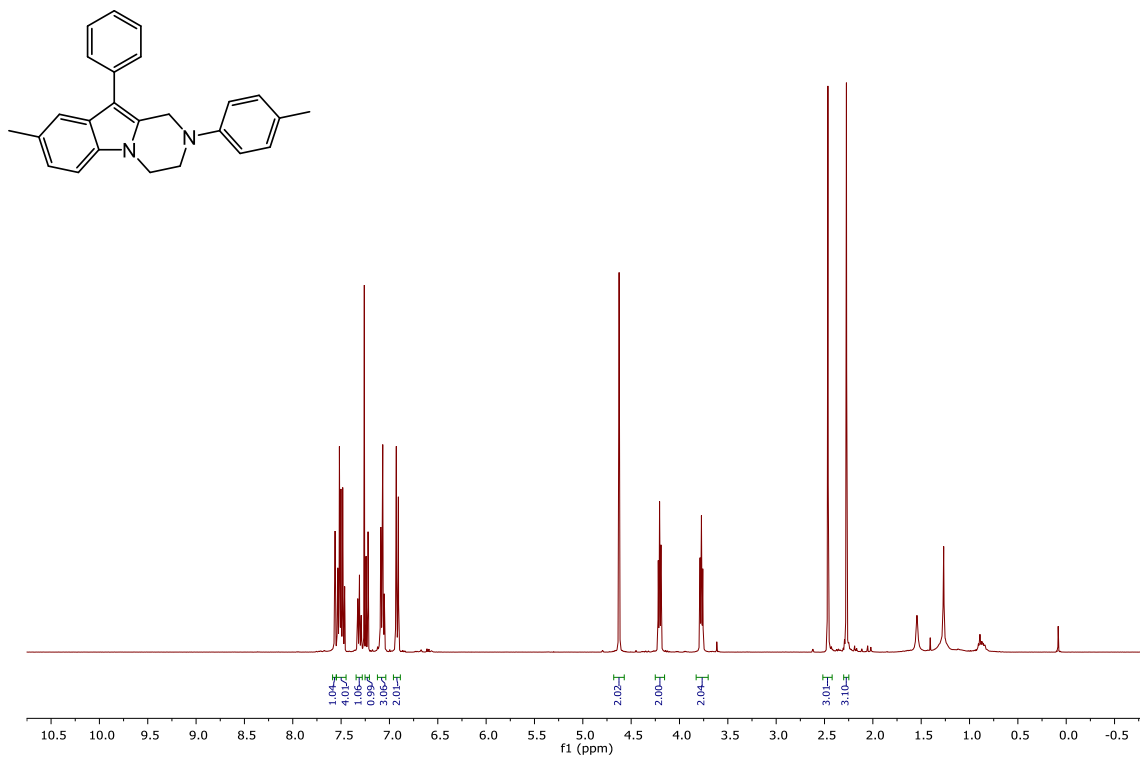

Compound 5aA <sup>13</sup>C NMR (CDCl<sub>3</sub>, 100 MHz)

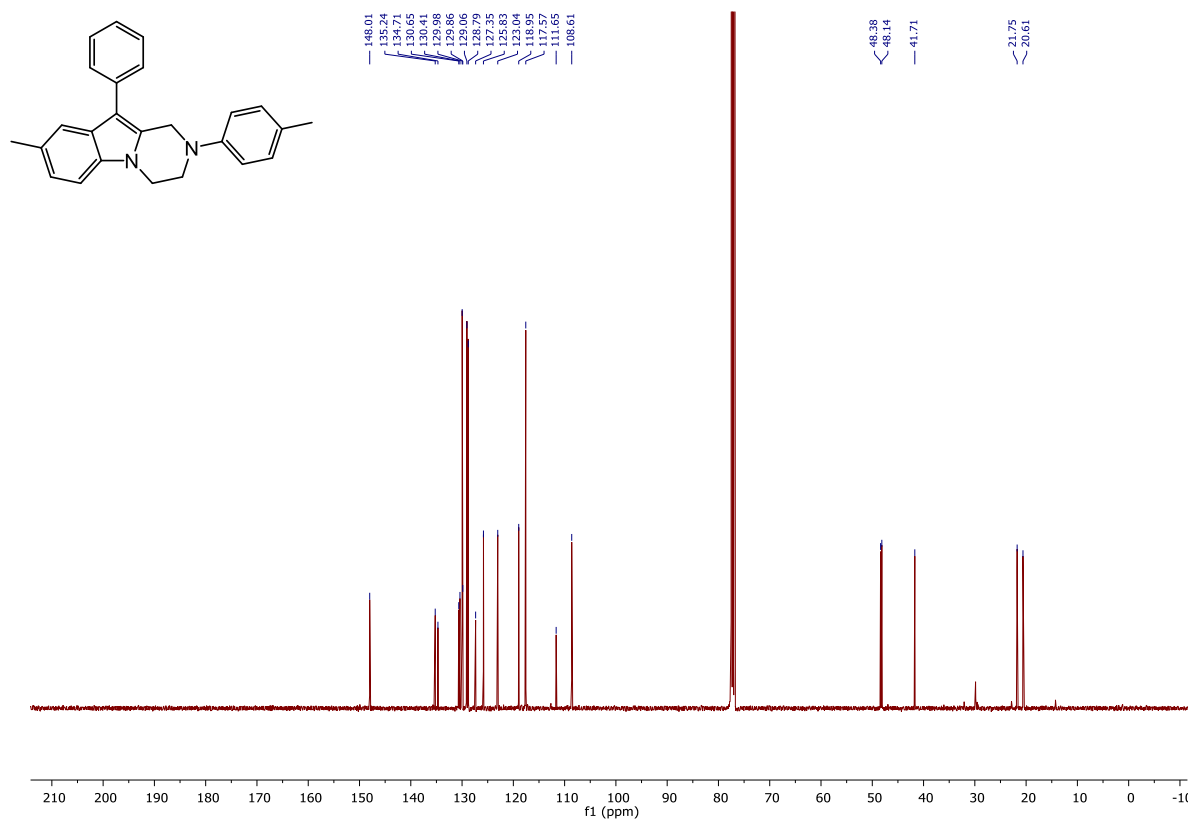

Compound 5dA <sup>1</sup>H NMR (CDCl<sub>3</sub>, 500 MHz)

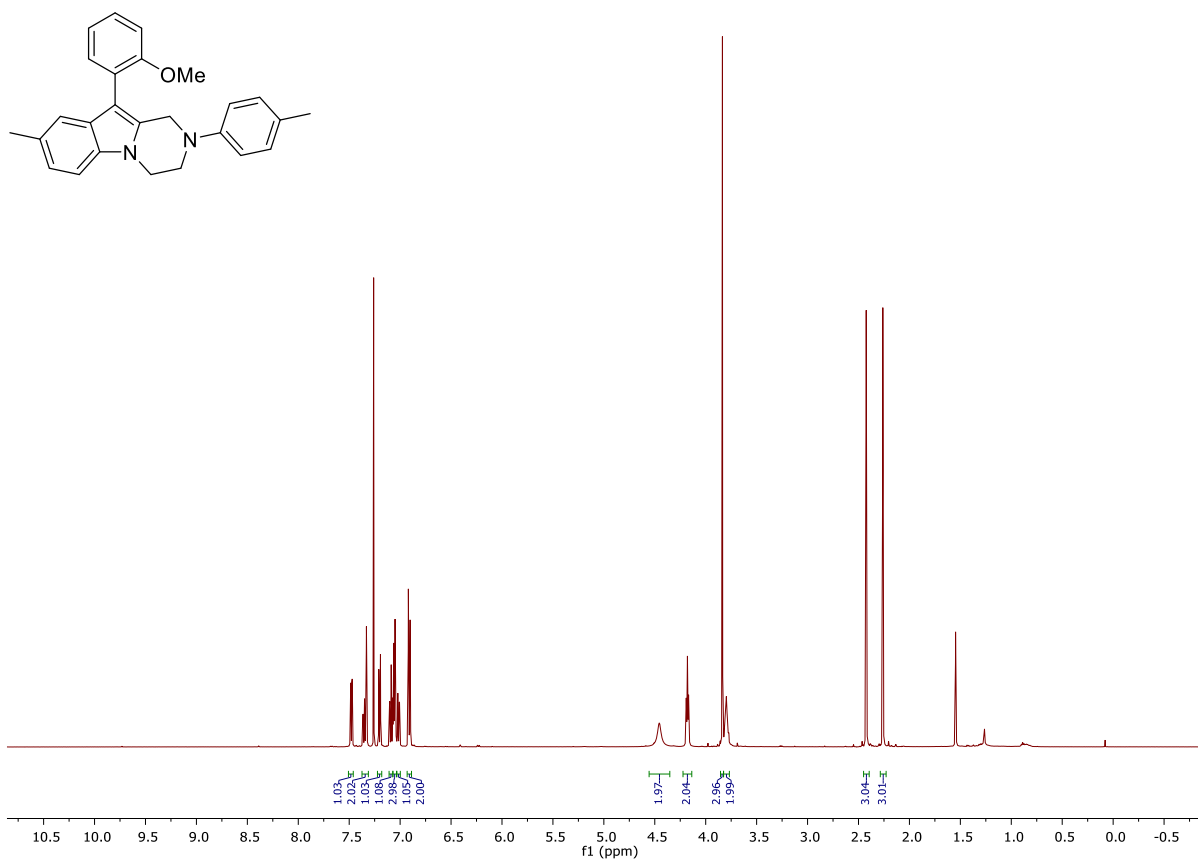

Compound 5dA <sup>13</sup>C NMR (CDCl<sub>3</sub>, 126 MHz)

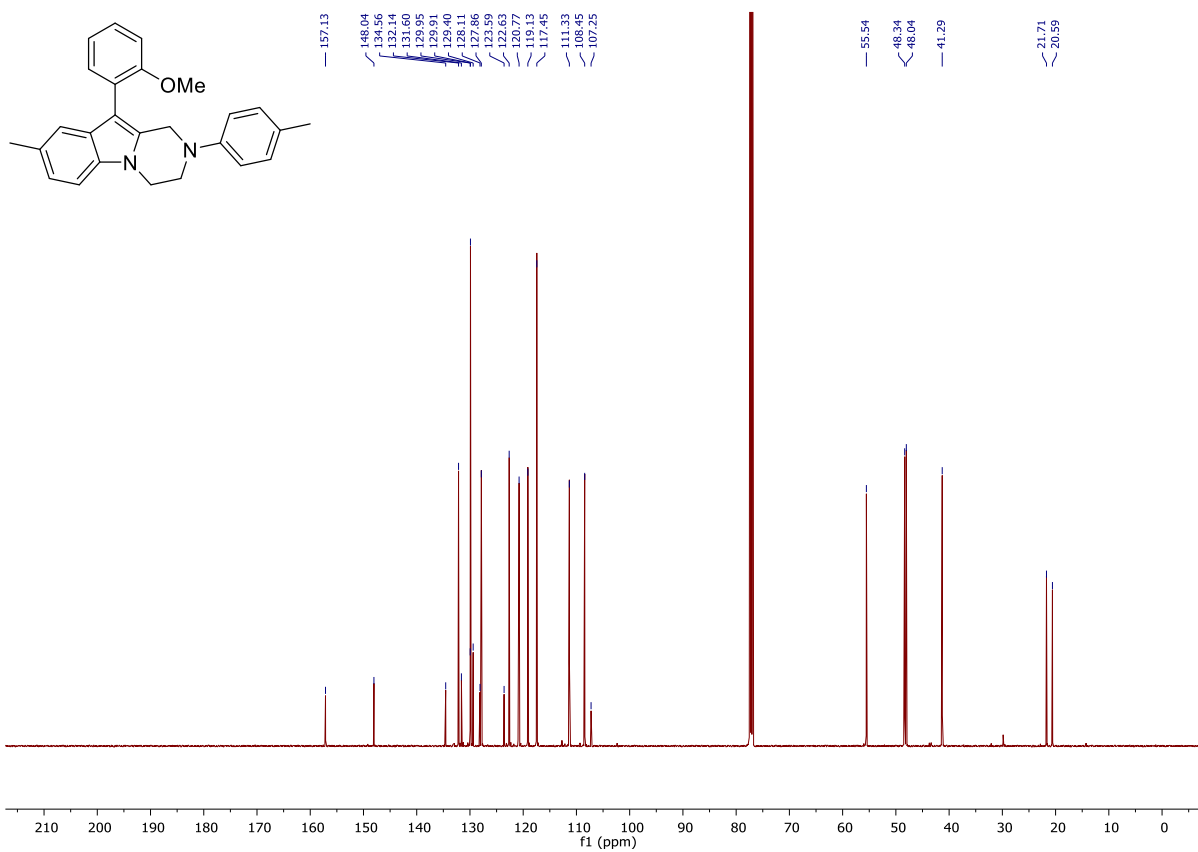

Compound 5fA <sup>1</sup>H NMR (CDCl<sub>3</sub>, 500 MHz)

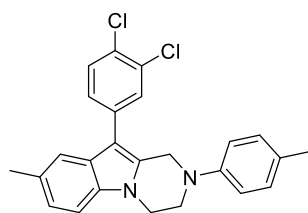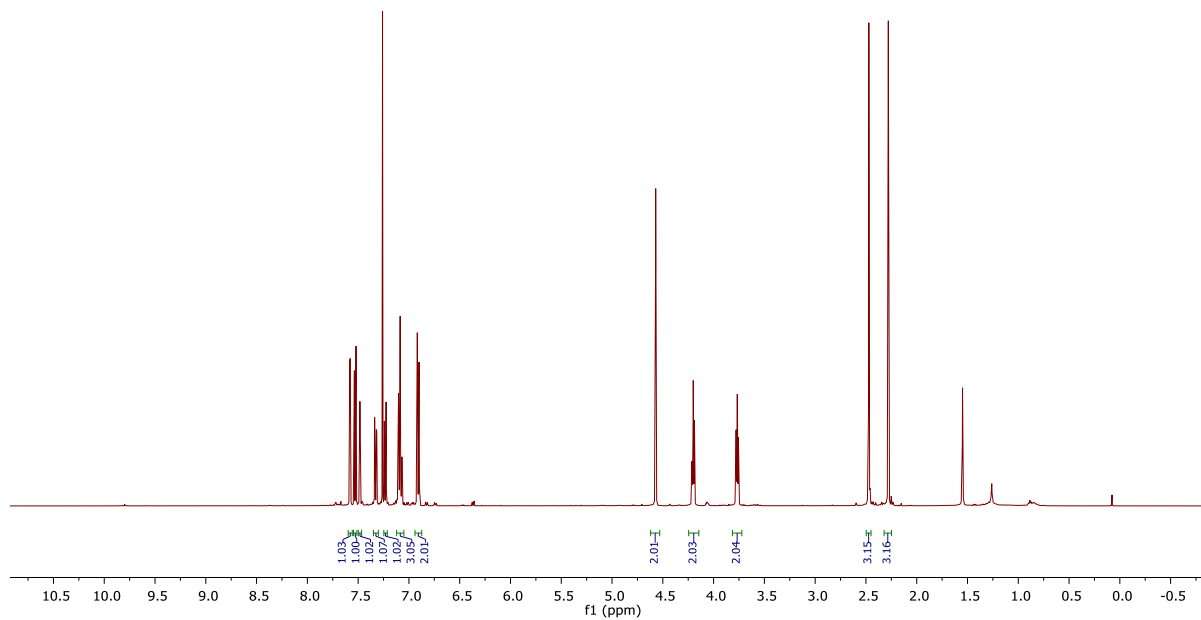

Compound 5fA <sup>13</sup>C NMR (CDCl<sub>3</sub>, 126 MHz)

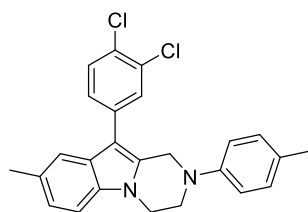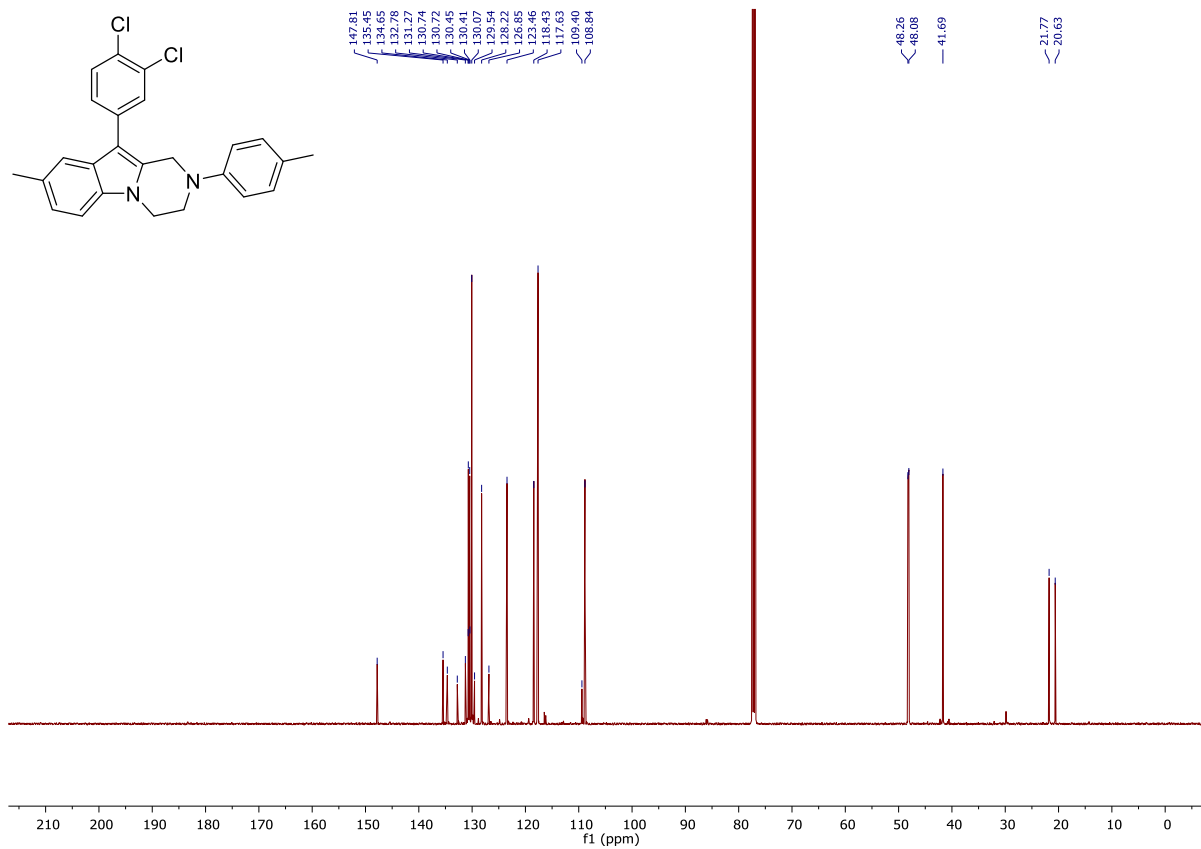

**Compound 5gA**  $^1\text{H}$  NMR ( $\text{CDCl}_3$ , 400 MHz)

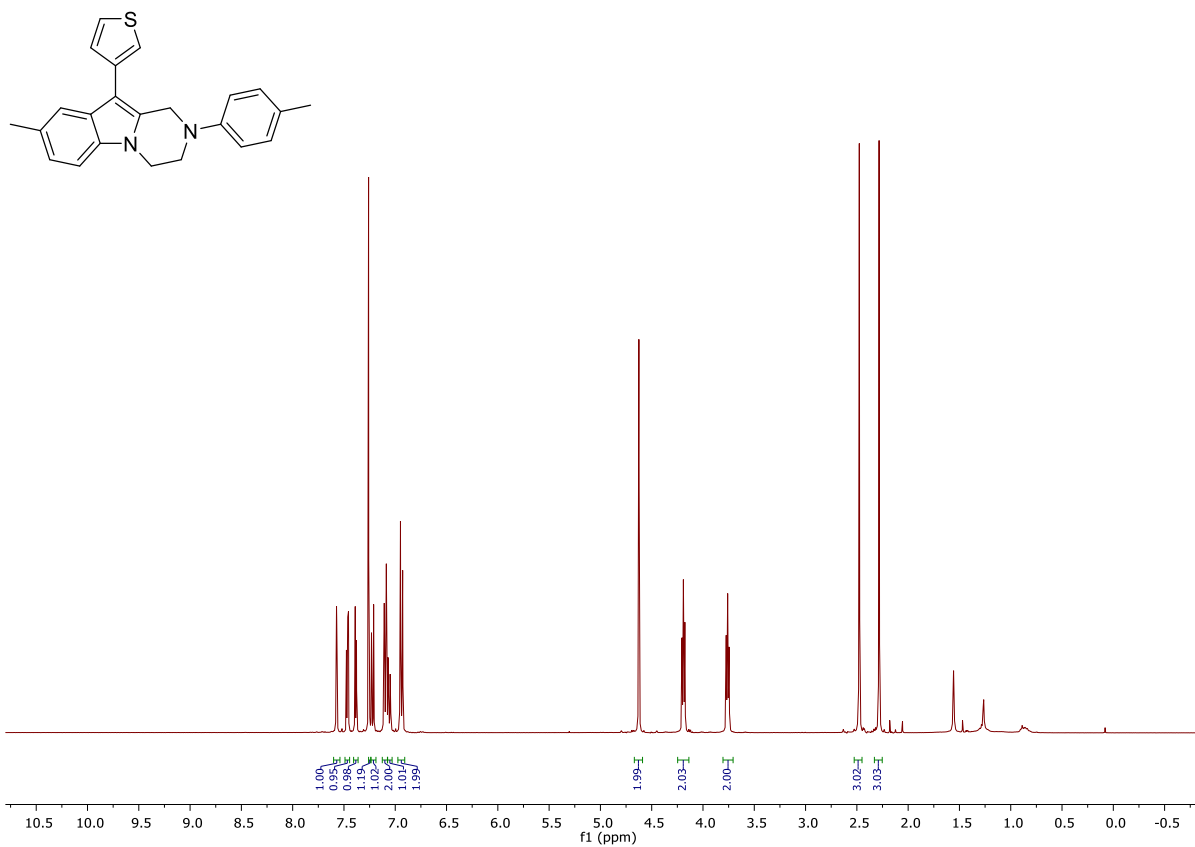

**Compound 5gA**  $^{13}\text{C}$  NMR ( $\text{CDCl}_3$ , 126 MHz)

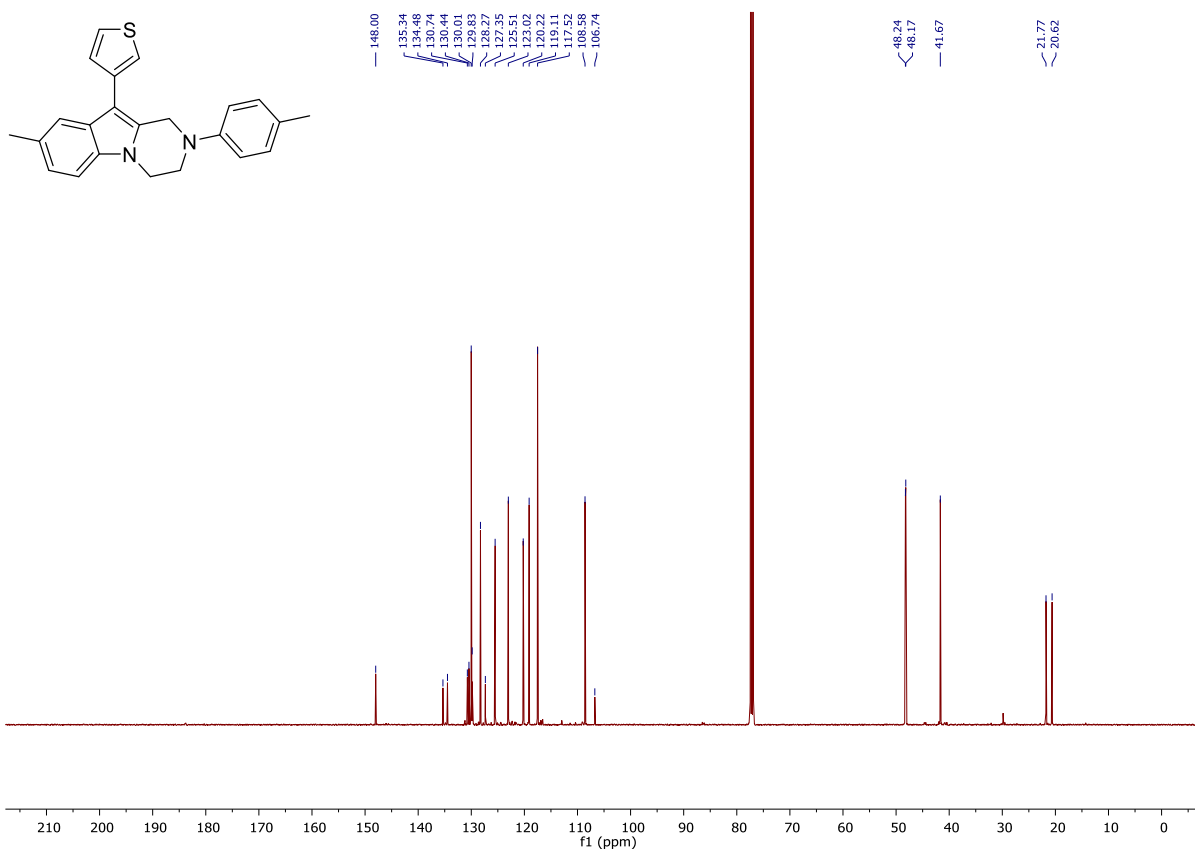

Compound 5hA <sup>1</sup>H NMR (CDCl<sub>3</sub>, 500 MHz)

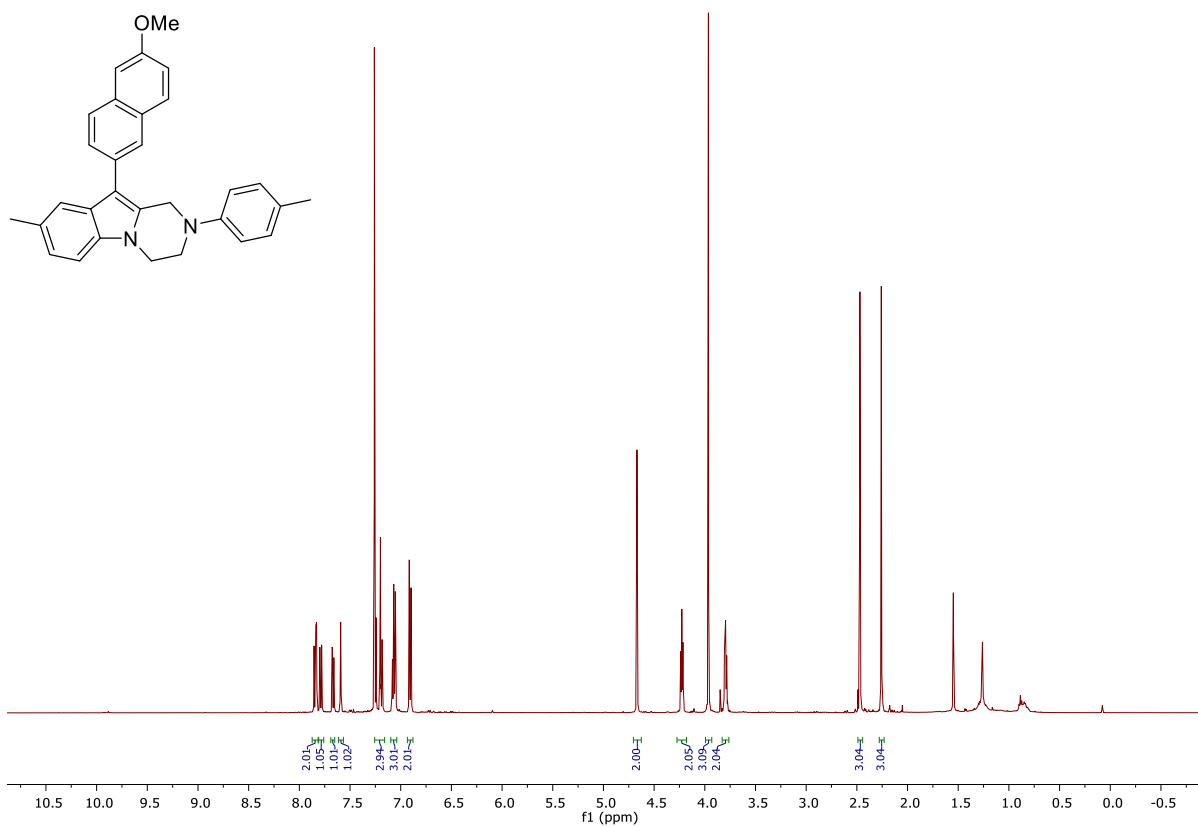

Compound 5hA <sup>13</sup>C NMR (CDCl<sub>3</sub>, 126 MHz)

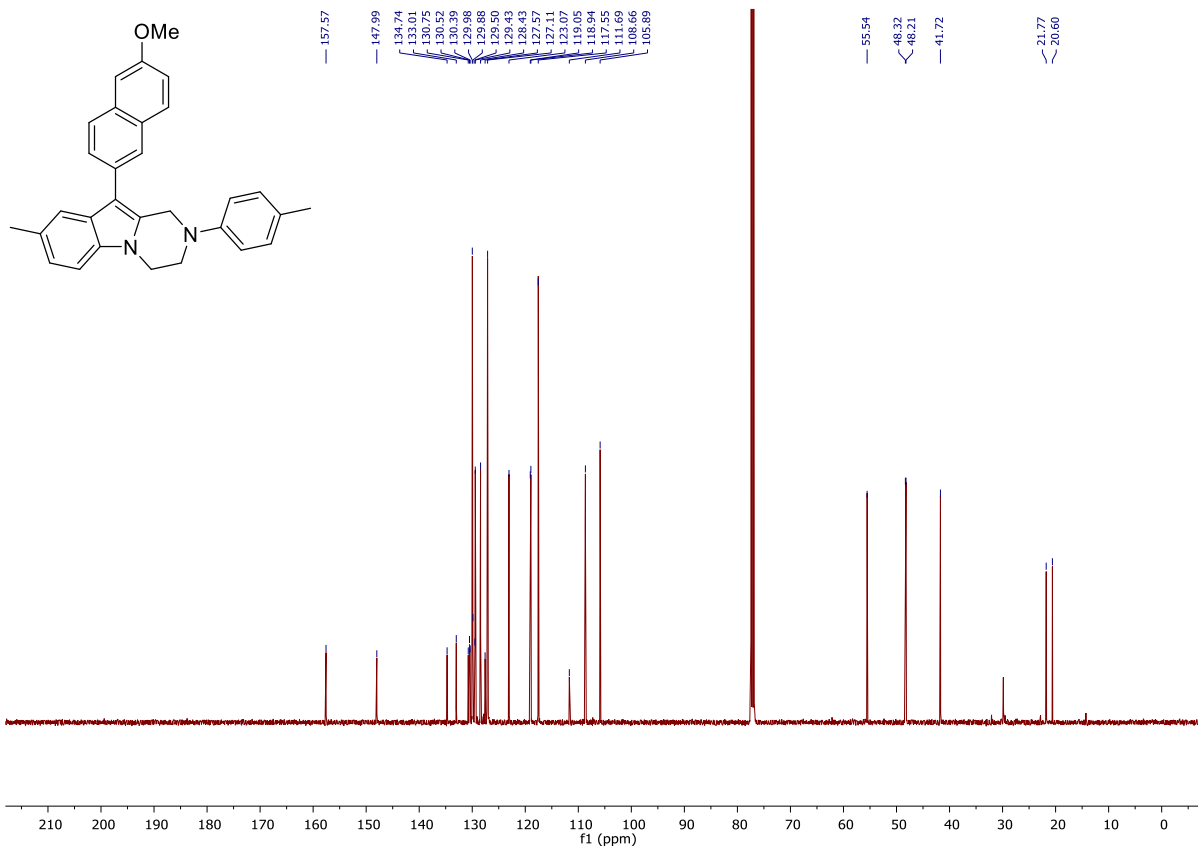

Compound 5aB <sup>1</sup>H NMR (CDCl<sub>3</sub>, 400 MHz)

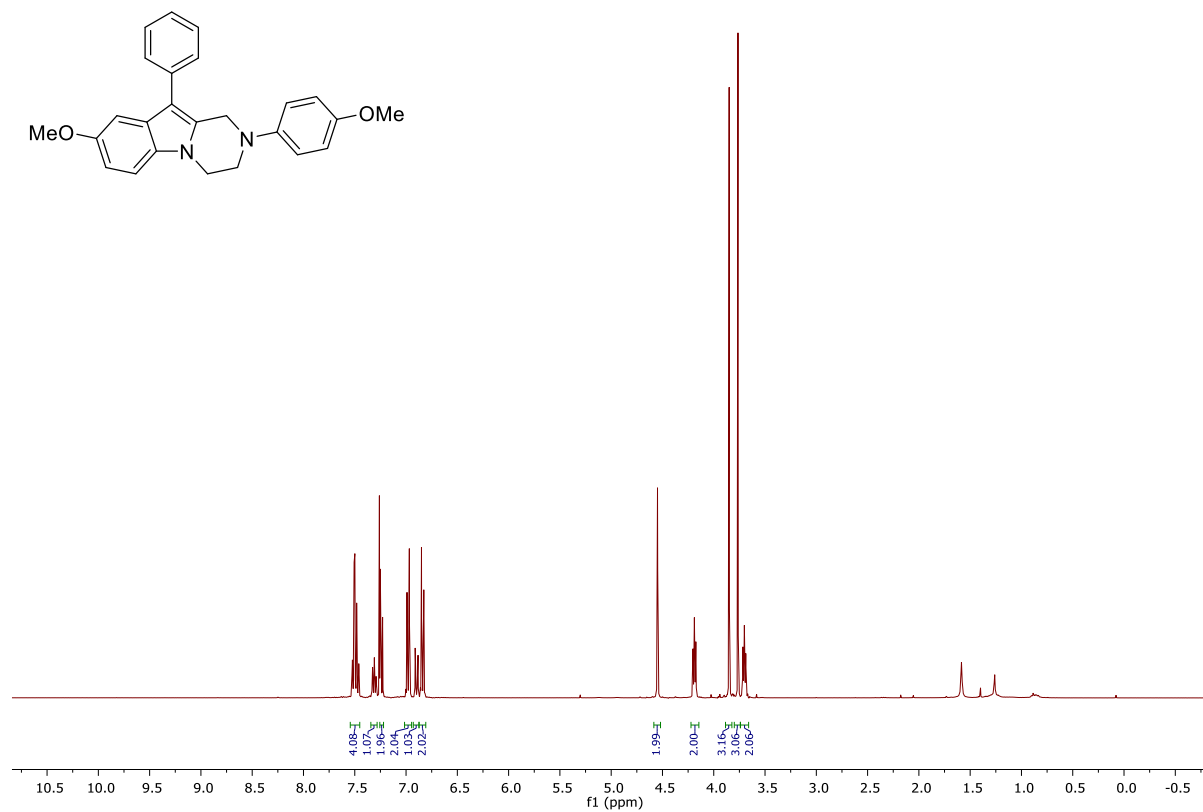

Compound 5aB <sup>13</sup>C NMR (CDCl<sub>3</sub>, 100 MHz)

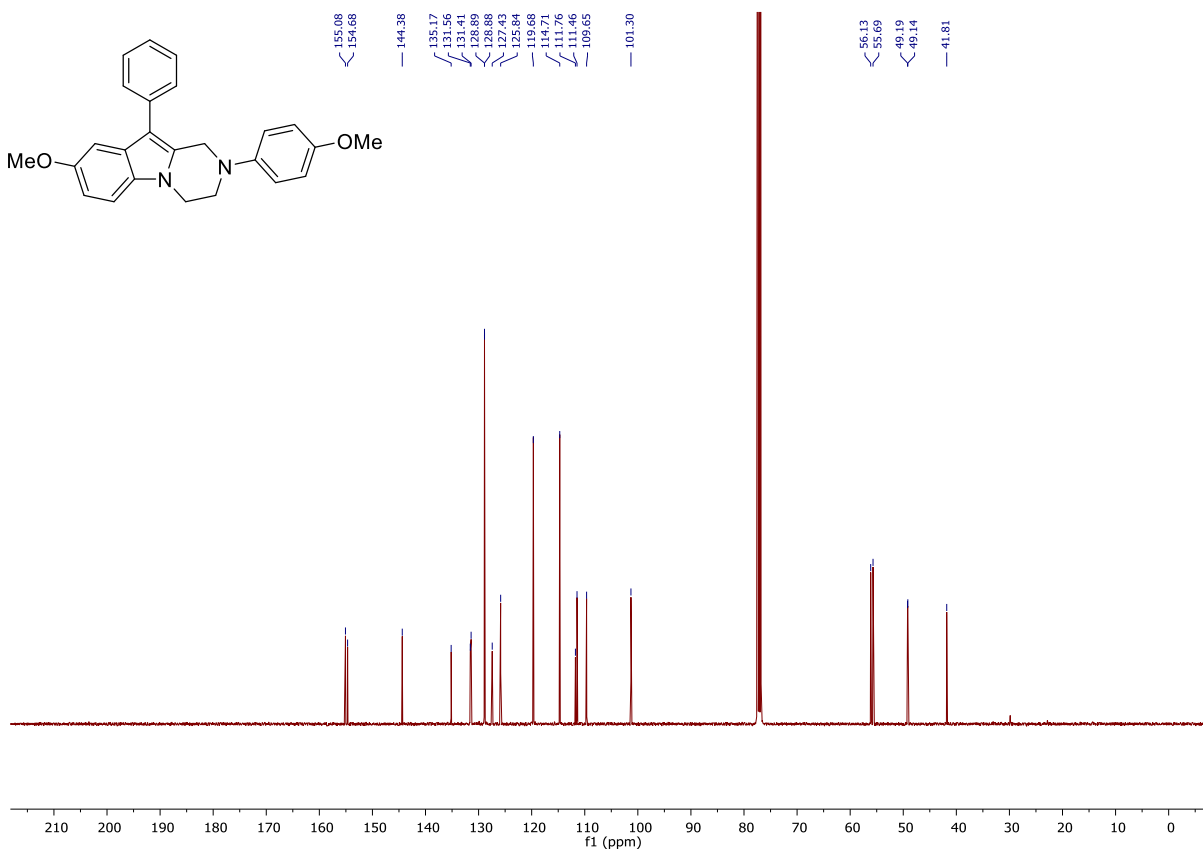

Compound 5aC <sup>1</sup>H NMR (CDCl<sub>3</sub>, 400 MHz)

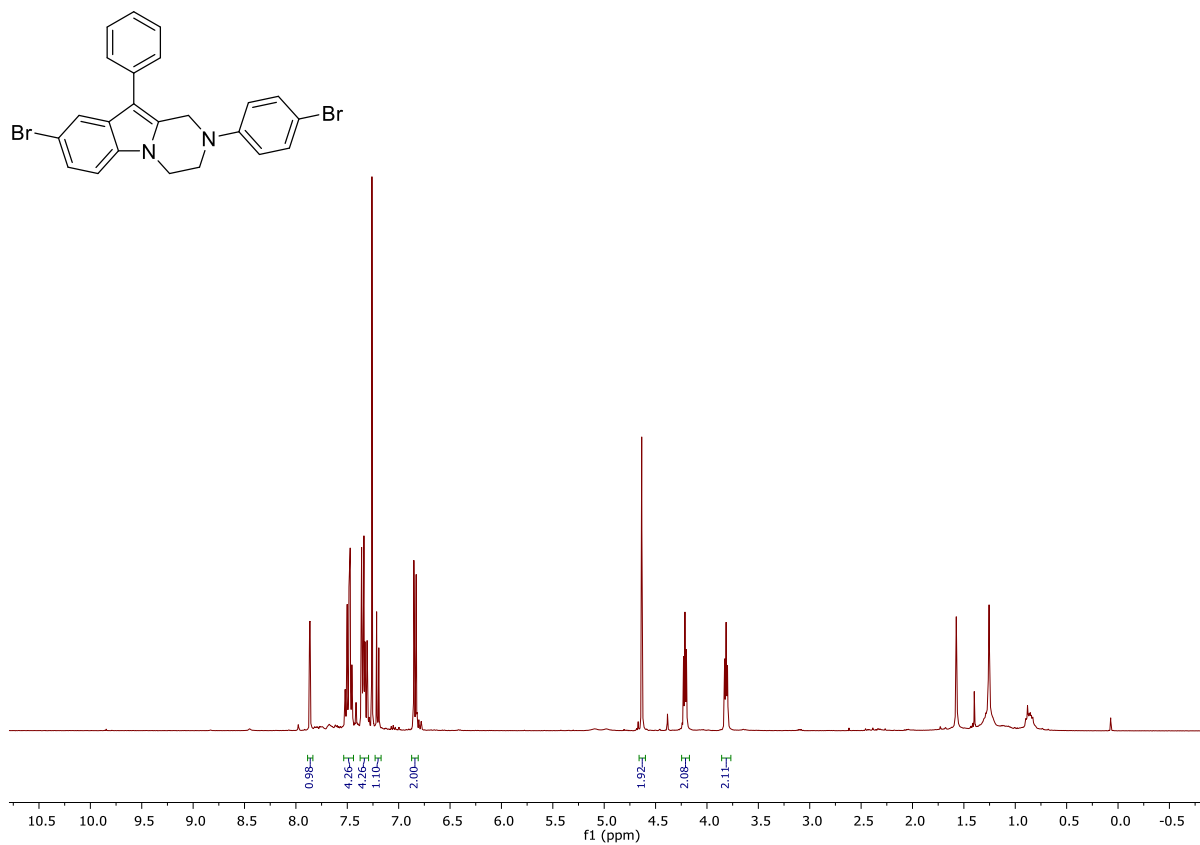

Compound 5aC <sup>13</sup>C NMR (CDCl<sub>3</sub>, 100 MHz)

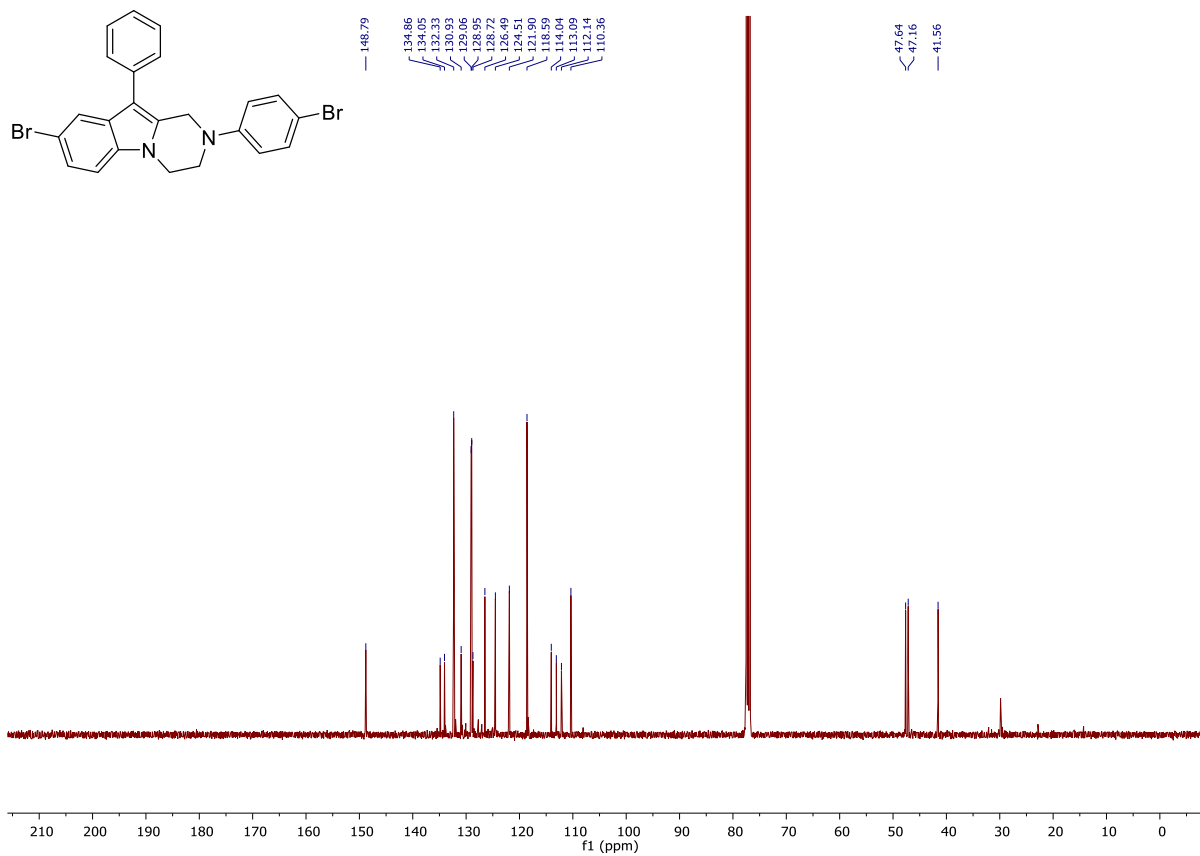

Compound 6 <sup>1</sup>H NMR (CDCl<sub>3</sub>, 500 MHz)

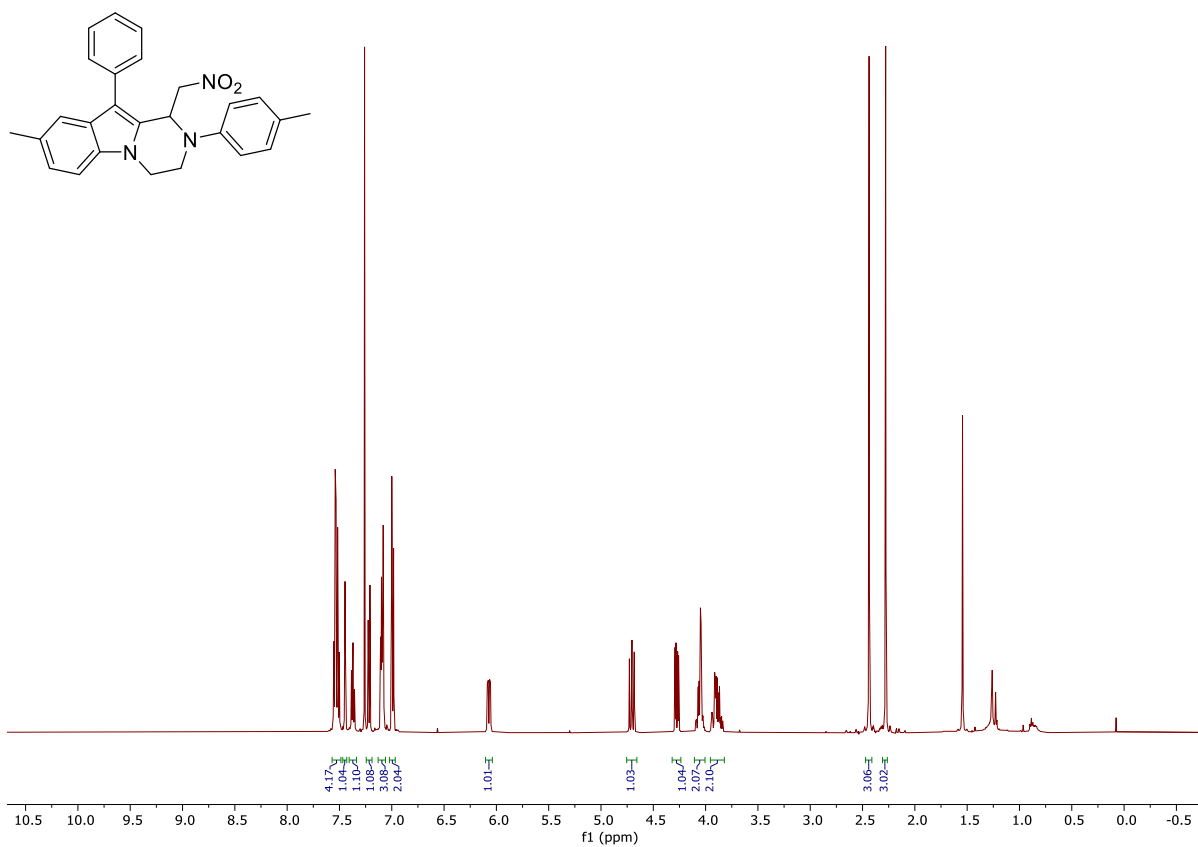

Compound 6 <sup>13</sup>C NMR (CDCl<sub>3</sub>, 126 MHz)

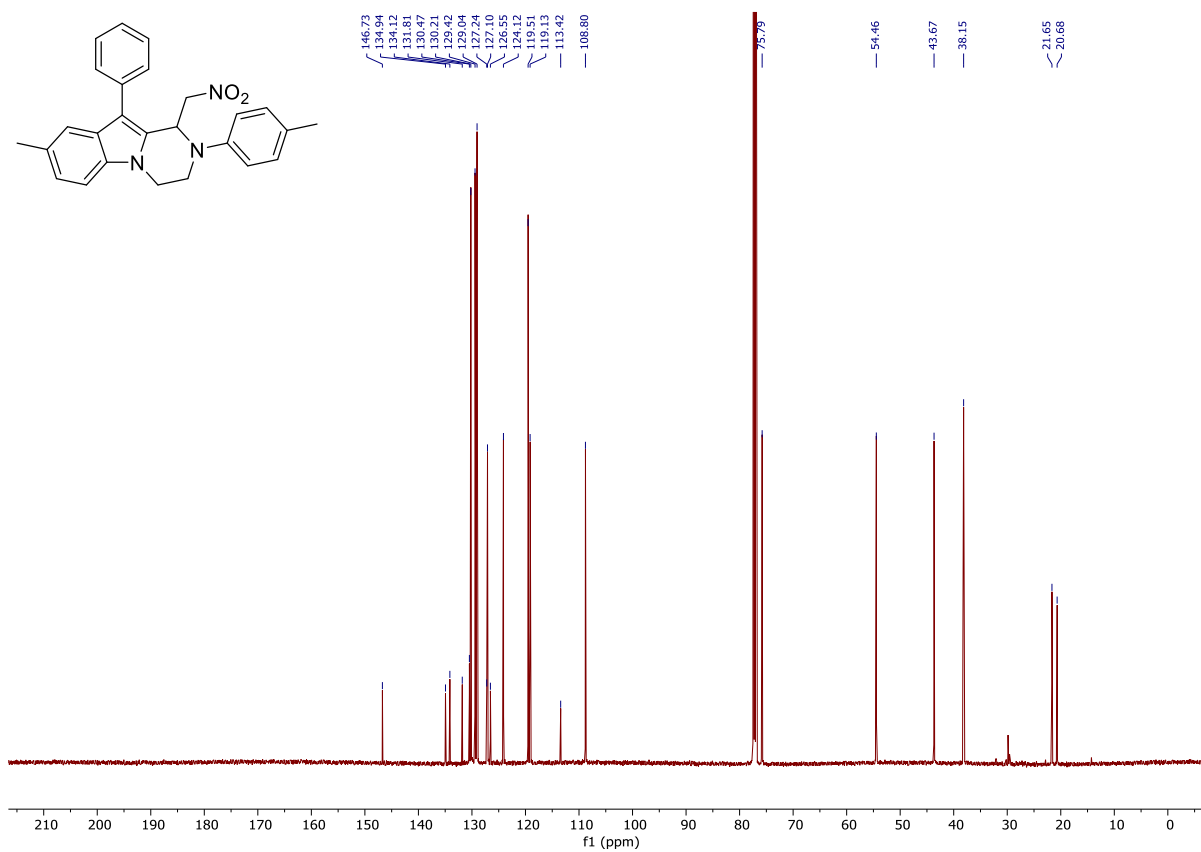



**Compound 7**  $^1\text{H}$  NMR ( $\text{CDCl}_3$ , 500 MHz)

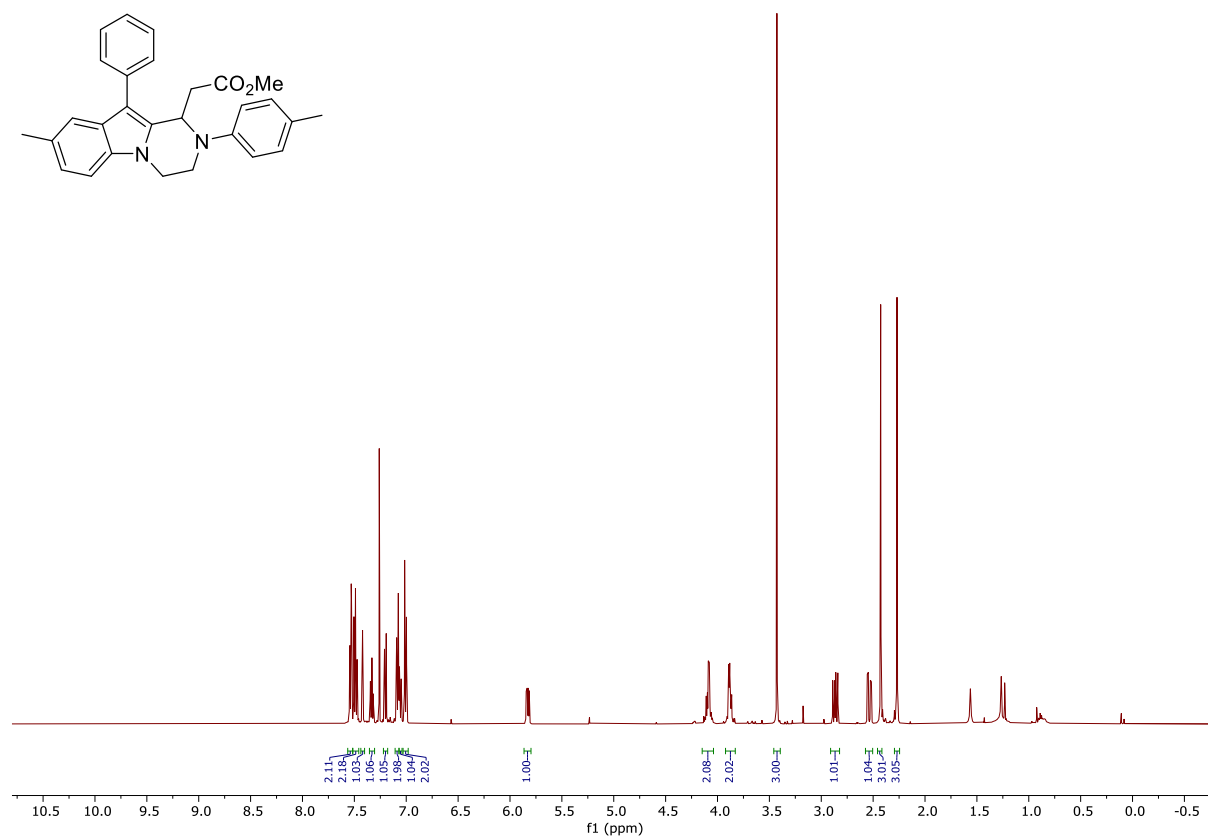

**Compound 7**  $^{13}\text{C}$  NMR ( $\text{CDCl}_3$ , 126 MHz)

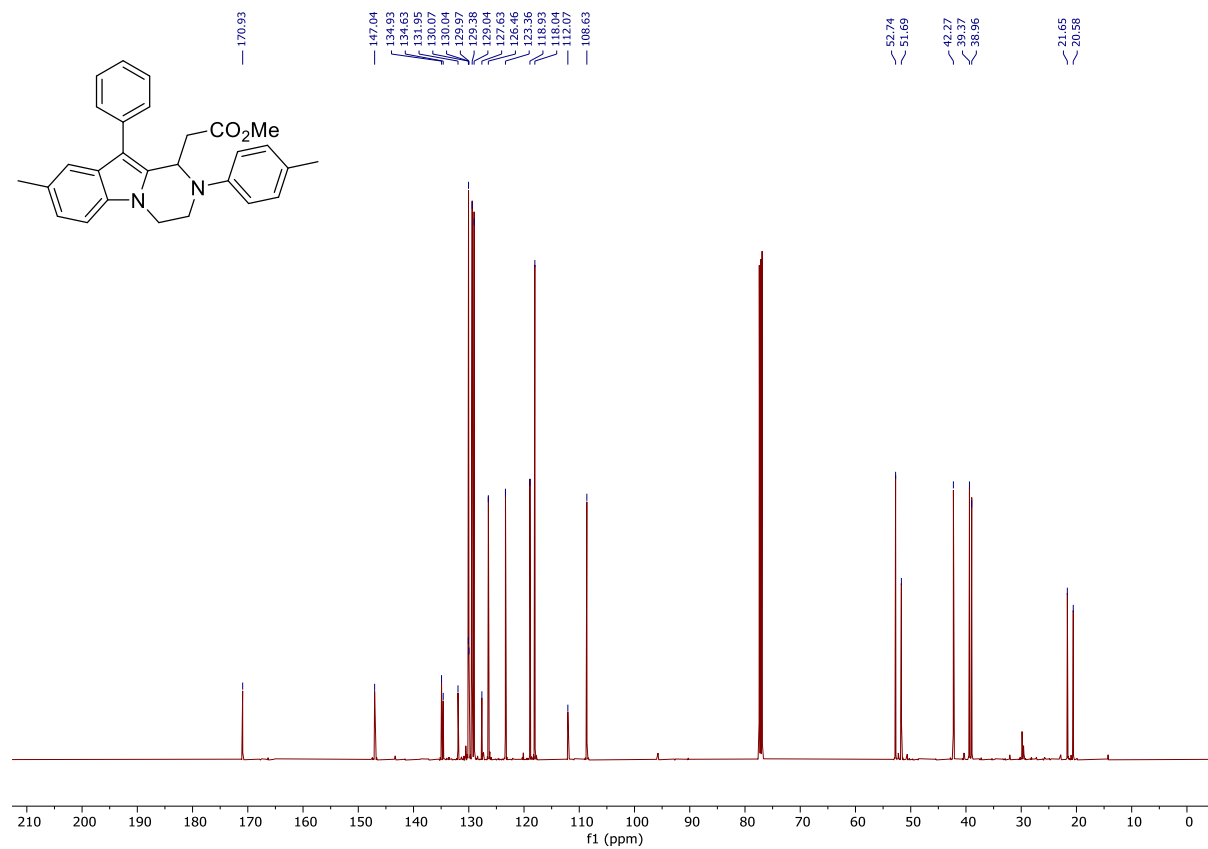

**Compound 8**  $^1\text{H}$  NMR ( $\text{CDCl}_3$ , 500 MHz)

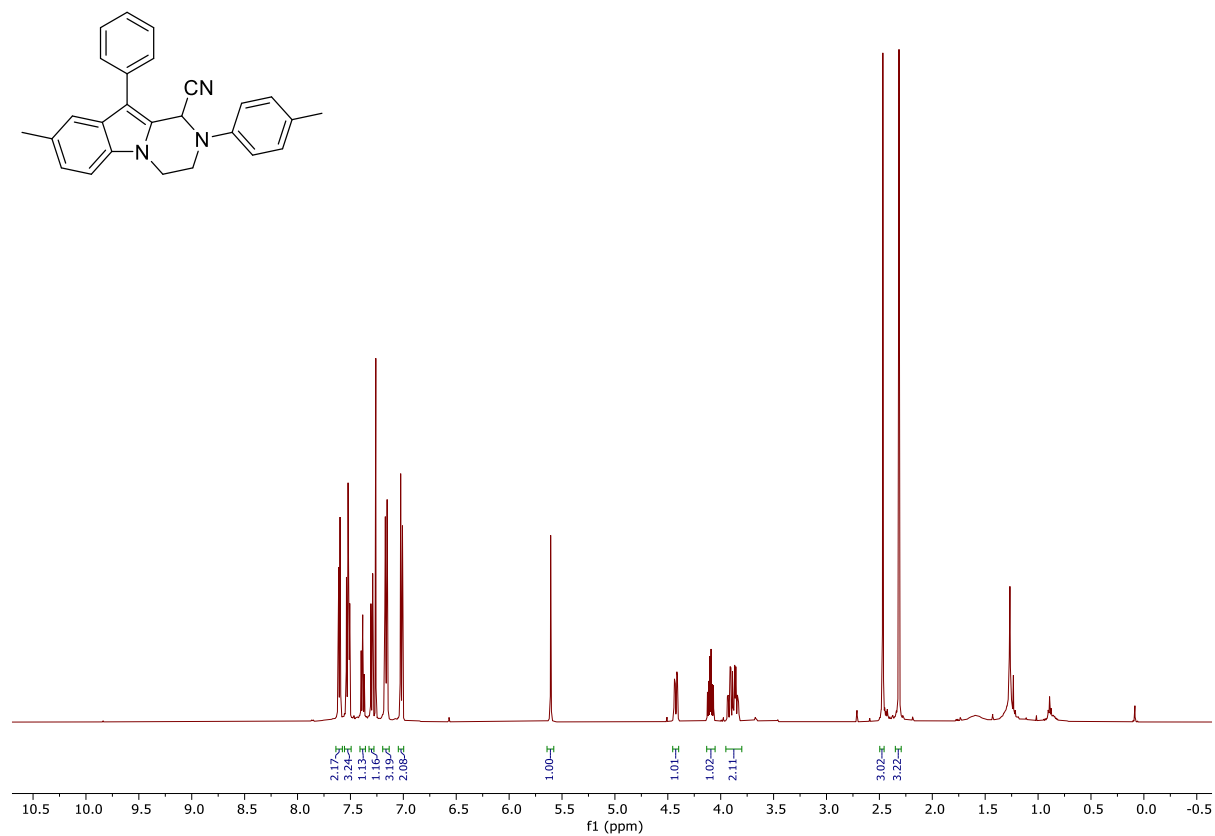

**Compound 8**  $^{13}\text{C}$  NMR ( $\text{CDCl}_3$ , 126 MHz)

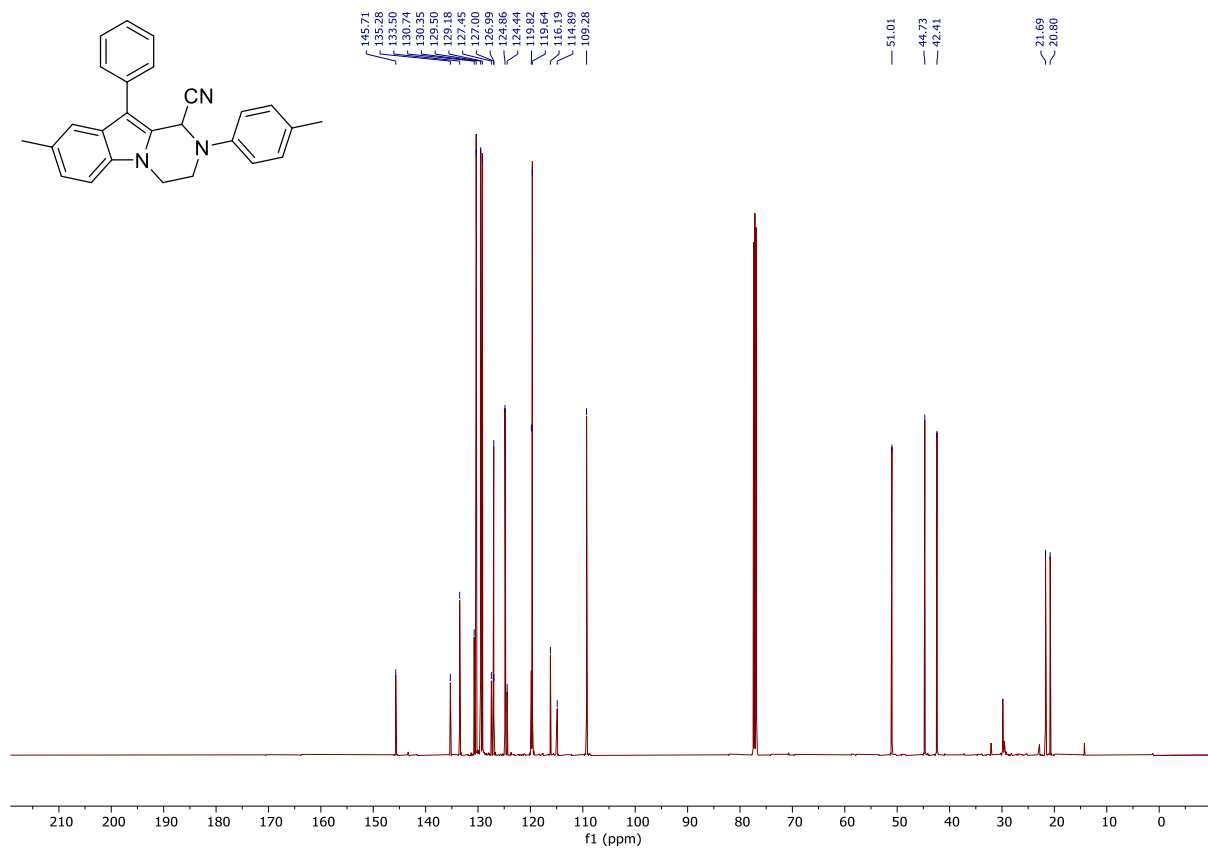

## 11. Crystallographic data

All data were collected on an Agilent supernova dual source diffractometer equipped with an Atlas detector, using Cu K $\alpha$  radiation. Data reduction was carried out in the crystalis Pro Software.<sup>4</sup> Structure solution was made using direct methods (Shelxs<sup>5</sup> or sir2004<sup>6</sup>). Refinements were carried out in Shexl<sup>5</sup> within the Olex2<sup>7</sup> software.

Details for the refinement for each structure are detailed below. For each structure, a representation of the asymmetric units shown as displacement ellipsoids, drawn as 50 percent probability is depicted (without showing disorder if present).

## Compound 3a''

|                                             |                                                                 |
|---------------------------------------------|-----------------------------------------------------------------|
| Empirical formula                           | C <sub>32</sub> H <sub>33</sub> N <sub>3</sub> O <sub>2</sub> S |
| <b>CCDC</b>                                 | <b>2015201</b>                                                  |
| Formula weight                              | 523.67                                                          |
| Temperature/K                               | 180.00(10)                                                      |
| Crystal system                              | monoclinic                                                      |
| Space group                                 | I2/a                                                            |
| a/Å                                         | 18.90952(14)                                                    |
| b/Å                                         | 10.14583(6)                                                     |
| c/Å                                         | 28.4275(2)                                                      |
| α/°                                         | 90                                                              |
| β/°                                         | 93.3559(7)                                                      |
| γ/°                                         | 90                                                              |
| Volume/Å <sup>3</sup>                       | 5444.54(7)                                                      |
| Z                                           | 8                                                               |
| ρ <sub>calc</sub> /g/cm <sup>3</sup>        | 1.278                                                           |
| μ/mm <sup>-1</sup>                          | 1.322                                                           |
| F(000)                                      | 2224.0                                                          |
| Crystal size/mm <sup>3</sup>                | 0.332 × 0.169 × 0.104                                           |
| Radiation                                   | CuKα (λ = 1.54184)                                              |
| 2θ range for data collection/°              | 6.228 to 147.27                                                 |
| Index ranges                                | -23 ≤ h ≤ 16, -12 ≤ k ≤ 12, -34 ≤ l ≤ 35                        |
| Reflections collected                       | 23114                                                           |
| Independent reflections                     | 5449 [R <sub>int</sub> = 0.0202, R <sub>sigma</sub> = 0.0136]   |
| Data/restraints/parameters                  | 5449/180/420                                                    |
| Goodness-of-fit on F <sup>2</sup>           | 1.071                                                           |
| Final R indexes [I ≥ 2σ (I)]                | R <sub>1</sub> = 0.0348, wR <sub>2</sub> = 0.0905               |
| Final R indexes [all data]                  | R <sub>1</sub> = 0.0372, wR <sub>2</sub> = 0.0926               |
| Largest diff. peak/hole / e Å <sup>-3</sup> | 0.22/-0.43                                                      |

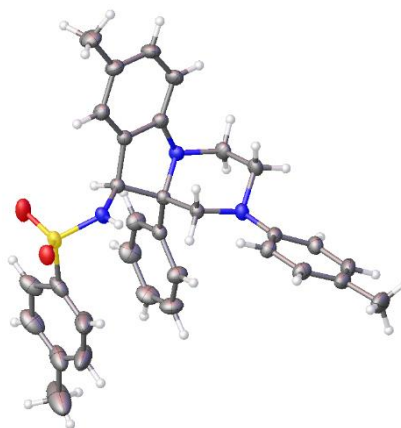

The methylphenyl group is disordered and was refined using two components. Restraints were applied on distances (same distances restraints), planarity of the ring and anisotropic displacement parameters.

The hydrogens bound to the carbon C9 are also disordered. 6 hydrogen atoms were used with half occupancies. Restraints were applied on the C-H distances.

## Compound 3aA'

|                                             |                                                                 |
|---------------------------------------------|-----------------------------------------------------------------|
| Empirical formula                           | C <sub>32</sub> H <sub>33</sub> N <sub>3</sub> O <sub>2</sub> S |
| <b>CCDC</b>                                 | <b>2015202</b>                                                  |
| Formula weight                              | 523.67                                                          |
| Temperature/K                               | 180.01(10)                                                      |
| Crystal system                              | triclinic                                                       |
| Space group                                 | P-1                                                             |
| a/Å                                         | 10.9678(3)                                                      |
| b/Å                                         | 15.3212(4)                                                      |
| c/Å                                         | 17.9064(5)                                                      |
| α/°                                         | 111.225(3)                                                      |
| β/°                                         | 98.183(3)                                                       |
| γ/°                                         | 98.485(3)                                                       |
| Volume/Å <sup>3</sup>                       | 2710.90(15)                                                     |
| Z                                           | 4                                                               |
| ρ <sub>calc</sub> /cm <sup>3</sup>          | 1.283                                                           |
| μ/mm <sup>-1</sup>                          | 1.327                                                           |
| F(000)                                      | 1112.0                                                          |
| Crystal size/mm <sup>3</sup>                | 0.411 × 0.182 × 0.046                                           |
| Radiation                                   | CuKα (λ = 1.54184)                                              |
| 2θ range for data collection/°              | 6.338 to 147.41                                                 |
| Index ranges                                | -13 ≤ h ≤ 13, -19 ≤ k ≤ 19, -22 ≤ l ≤ 22                        |
| Reflections collected                       | 42868                                                           |
| Independent reflections                     | 10776 [R <sub>int</sub> = 0.0370, R <sub>sigma</sub> = 0.0292]  |
| Data/restraints/parameters                  | 10776/0/698                                                     |
| Goodness-of-fit on F <sup>2</sup>           | 1.035                                                           |
| Final R indexes [I ≥ 2σ (I)]                | R <sub>1</sub> = 0.0381, wR <sub>2</sub> = 0.0989               |
| Final R indexes [all data]                  | R <sub>1</sub> = 0.0480, wR <sub>2</sub> = 0.1064               |
| Largest diff. peak/hole / e Å <sup>-3</sup> | 0.24/-0.42                                                      |

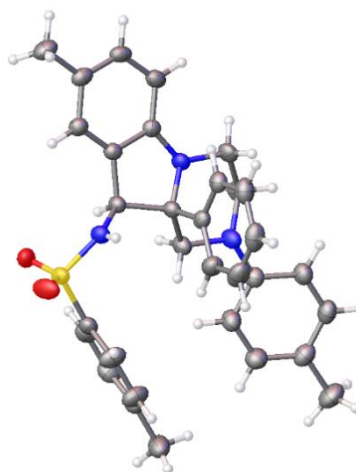

There are two molecules per asymmetric unit. They can be overlaid. (root mean square deviations between the equivalent atoms in the two different molecules is 0.282Å)

## Compound 4aE

|                                             |                                                                 |
|---------------------------------------------|-----------------------------------------------------------------|
| Empirical formula                           | C <sub>31</sub> H <sub>30</sub> N <sub>4</sub> O <sub>5</sub> S |
| <b>CCDC</b>                                 | <b>2015200</b>                                                  |
| Formula weight                              | 570.65                                                          |
| Temperature/K                               | 180.01(10)                                                      |
| Crystal system                              | monoclinic                                                      |
| Space group                                 | P2 <sub>1</sub> /n                                              |
| a/Å                                         | 10.14023(8)                                                     |
| b/Å                                         | 15.89219(10)                                                    |
| c/Å                                         | 18.23835(15)                                                    |
| α/°                                         | 90                                                              |
| β/°                                         | 105.5221(8)                                                     |
| γ/°                                         | 90                                                              |
| Volume/Å <sup>3</sup>                       | 2831.92(4)                                                      |
| Z                                           | 4                                                               |
| ρ <sub>calc</sub> /cm <sup>3</sup>          | 1.338                                                           |
| μ/mm <sup>-1</sup>                          | 1.411                                                           |
| F(000)                                      | 1200.0                                                          |
| Crystal size/mm <sup>3</sup>                | 0.426 × 0.303 × 0.19                                            |
| Radiation                                   | CuKα (λ = 1.54184)                                              |
| 2θ range for data collection/°              | 7.5 to 147.26                                                   |
| Index ranges                                | -12 ≤ h ≤ 7, -19 ≤ k ≤ 19, -22 ≤ l ≤ 22                         |
| Reflections collected                       | 19567                                                           |
| Independent reflections                     | 5648 [R <sub>int</sub> = 0.0234, R <sub>sigma</sub> = 0.0189]   |
| Data/restraints/parameters                  | 5648/3/380                                                      |
| Goodness-of-fit on F <sup>2</sup>           | 1.066                                                           |
| Final R indexes [I > 2σ (I)]                | R <sub>1</sub> = 0.0409, wR <sub>2</sub> = 0.1055               |
| Final R indexes [all data]                  | R <sub>1</sub> = 0.0438, wR <sub>2</sub> = 0.1083               |
| Largest diff. peak/hole / e Å <sup>-3</sup> | 0.26/-0.53                                                      |

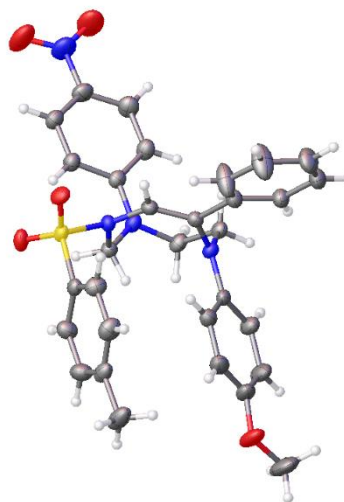

The O-methyl group is disordered and was refined using two components. Same distances restraints were applied, and anisotropic displacement parameters of identical atoms were constrained to be identical

## Compound 5aA

|                                             |                                                               |
|---------------------------------------------|---------------------------------------------------------------|
| Empirical formula                           | C <sub>25</sub> H <sub>24</sub> N <sub>2</sub>                |
| <b>CCDC</b>                                 | <b>2015203</b>                                                |
| Formula weight                              | 352.46                                                        |
| Temperature/K                               | 180.01(10)                                                    |
| Crystal system                              | orthorhombic                                                  |
| Space group                                 | Pbca                                                          |
| a/Å                                         | 21.3021(10)                                                   |
| b/Å                                         | 7.7181(4)                                                     |
| c/Å                                         | 23.5444(12)                                                   |
| α/°                                         | 90                                                            |
| β/°                                         | 90                                                            |
| γ/°                                         | 90                                                            |
| Volume/Å <sup>3</sup>                       | 3871.0(3)                                                     |
| Z                                           | 8                                                             |
| ρ <sub>calc</sub> /cm <sup>3</sup>          | 1.210                                                         |
| μ/mm <sup>-1</sup>                          | 0.539                                                         |
| F(000)                                      | 1504.0                                                        |
| Crystal size/mm <sup>3</sup>                | 0.466 × 0.067 × 0.02                                          |
| Radiation                                   | CuKα (λ = 1.54184)                                            |
| 2θ range for data collection/°              | 7.51 to 140.92                                                |
| Index ranges                                | -17 ≤ h ≤ 25, -6 ≤ k ≤ 9, -28 ≤ l ≤ 19                        |
| Reflections collected                       | 8929                                                          |
| Independent reflections                     | 3621 [R <sub>int</sub> = 0.0444, R <sub>sigma</sub> = 0.0524] |
| Data/restraints/parameters                  | 3621/0/247                                                    |
| Goodness-of-fit on F <sup>2</sup>           | 1.027                                                         |
| Final R indexes [I >= 2σ (I)]               | R <sub>1</sub> = 0.0549, wR <sub>2</sub> = 0.1293             |
| Final R indexes [all data]                  | R <sub>1</sub> = 0.0881, wR <sub>2</sub> = 0.1547             |
| Largest diff. peak/hole / e Å <sup>-3</sup> | 0.19/-0.21                                                    |

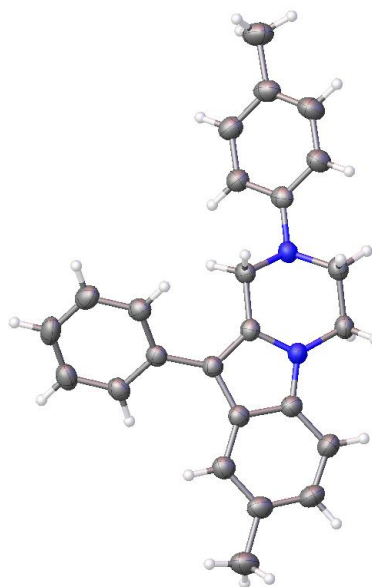

## Compound 6

|                                             |                                                               |
|---------------------------------------------|---------------------------------------------------------------|
| <b>CCDC</b>                                 | <b>2015204</b>                                                |
| Empirical formula                           | C <sub>26</sub> H <sub>25</sub> N <sub>3</sub> O <sub>2</sub> |
| Formula weight                              | 411.49                                                        |
| Temperature/K                               | 149.99(10)                                                    |
| Crystal system                              | orthorhombic                                                  |
| Space group                                 | Iba2                                                          |
| a/Å                                         | 18.50216(12)                                                  |
| b/Å                                         | 21.27952(14)                                                  |
| c/Å                                         | 10.92519(7)                                                   |
| α/°                                         | 90                                                            |
| β/°                                         | 90                                                            |
| γ/°                                         | 90                                                            |
| Volume/Å <sup>3</sup>                       | 4301.43(5)                                                    |
| Z                                           | 8                                                             |
| ρ <sub>calc</sub> /cm <sup>3</sup>          | 1.271                                                         |
| μ/mm <sup>-1</sup>                          | 0.647                                                         |
| F(000)                                      | 1744.0                                                        |
| Crystal size/mm <sup>3</sup>                | 0.652 × 0.112 × 0.049                                         |
| Radiation                                   | Cu Kα (λ = 1.54184)                                           |
| 2θ range for data collection/°              | 6.33 to 149.794                                               |
| Index ranges                                | -23 ≤ h ≤ 23, -26 ≤ k ≤ 26, -13 ≤ l ≤ 12                      |
| Reflections collected                       | 89610                                                         |
| Independent reflections                     | 4355 [R <sub>int</sub> = 0.0318, R <sub>sigma</sub> = 0.0090] |
| Data/restraints/parameters                  | 4355/44/311                                                   |
| Goodness-of-fit on F <sup>2</sup>           | 1.048                                                         |
| Final R indexes [I >= 2σ (I)]               | R <sub>1</sub> = 0.0280, wR <sub>2</sub> = 0.0713             |
| Final R indexes [all data]                  | R <sub>1</sub> = 0.0289, wR <sub>2</sub> = 0.0720             |
| Largest diff. peak/hole / e Å <sup>-3</sup> | 0.11/-0.18                                                    |
| Flack parameter                             | -0.1(3)                                                       |

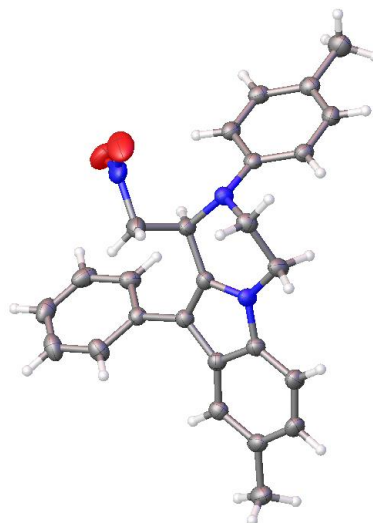

The space group contains symmetry elements of the second kind.

The NO<sub>2</sub> group is disordered and was refined using two components with the same distance restraints on N-O distances and on C-N distances and rigid-bond restraints on displacement parameters.



## 12. Computational data

### Rh<sub>2</sub>(Piv)<sub>4</sub> with Me-Me imidazolidine – A to C

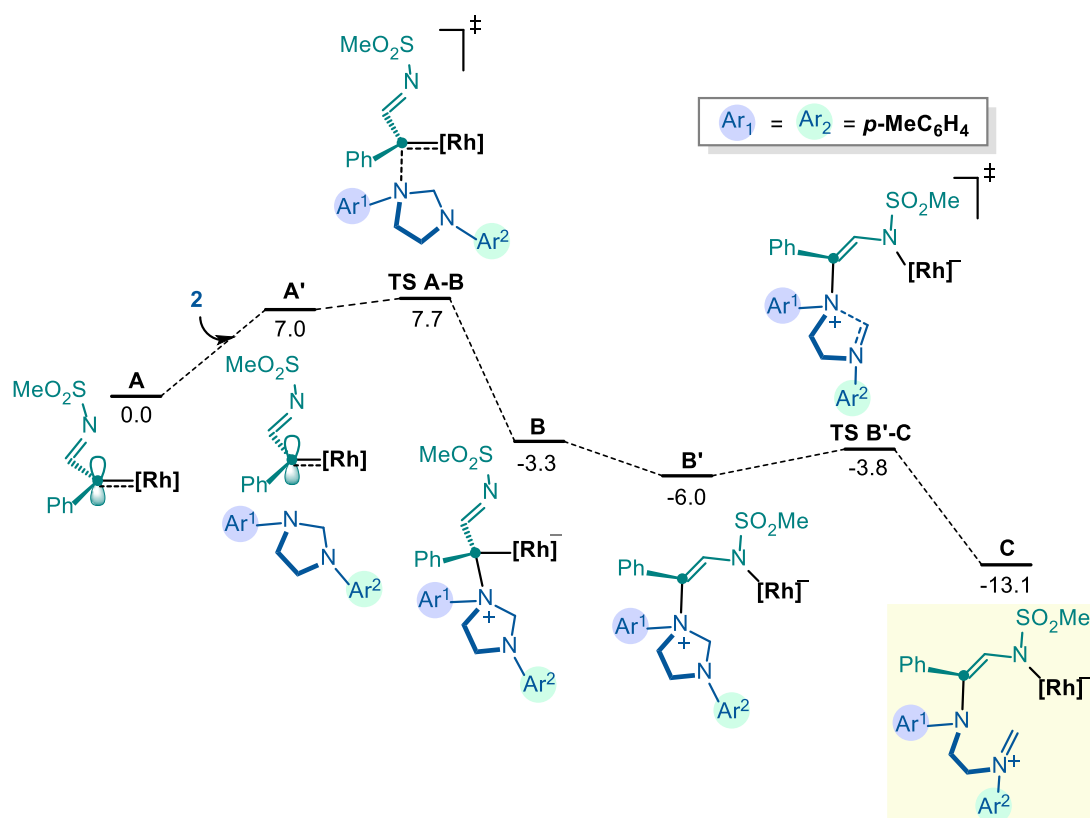

**Fig. S1.** Full Gibbs-energy profile for the Me-Me (Ar<sup>1</sup>, Ar<sup>2</sup> EDGs) imidazolidine ring opening by Rh<sub>2</sub>(Piv)<sub>4</sub> system. Energies in kcal·mol<sup>-1</sup>.

The full mechanism from **A** to **C** with the Me-Me (Ar<sup>1</sup>, Ar<sup>2</sup> EDGs) imidazolidine and the Rh<sub>2</sub>(Piv)<sub>4</sub> system is depicted in Fig. S1. The mechanism starts with the interaction of the imidazolidine **2** in **A'** found at 7.0 kcal·mol<sup>-1</sup>. Then, **TS A-B** takes place with an overall barrier of 7.7 kcal·mol<sup>-1</sup>, to form intermediate **B** placed at -3.3 kcal·mol<sup>-1</sup> from the initial reactants. At this point, the next step would consist in the imidazolidine ring opening. Nevertheless, we were not able to find the transition state for this step while the Rh catalyst is attached to the C atom. Instead, the Rh catalyst switches from the C to the N atom in an exergonic step. At this point, the imidazolidine opening runs with a barrier of only 2.2 kcal·mol<sup>-1</sup>, **TS B'-C**, to form intermediate **C** found at 13.1 kcal·mol<sup>-1</sup> from the initial reactants.

## Rh<sub>2</sub>(Piv)<sub>4</sub> with Me-Me imidazolidine – C to 4

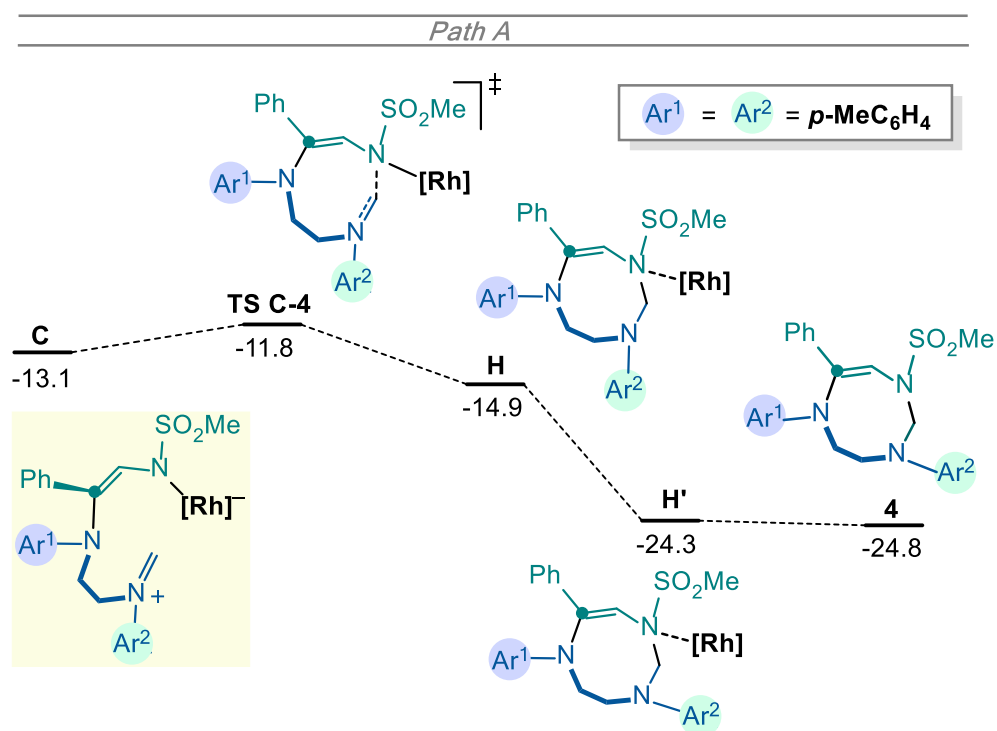

**Fig. S2.** Full Gibbs-energy profile for the formation of product **4** from intermediate **C** with the Me-Me (Ar<sup>1</sup>, Ar<sup>2</sup> EDGs) imidazolidine catalyzed by Rh<sub>2</sub>(Piv)<sub>4</sub>. Energies in kcal·mol<sup>-1</sup>.

From intermediate **C**, product **4** is formed after a quasi-barrierless step, **TS C-4**, and subsequent rearrangement. The hexahydro-1,3,6-triazocines product **4** is found at 11.7 kcal·mol<sup>-1</sup> below intermediate **C** and 24.8 kcal·mol<sup>-1</sup> below **A** (Fig. S1).

## Rh<sub>2</sub>(Piv)<sub>4</sub> with Me-Me imidazolidine – C to 3 via Friedel-Crafts

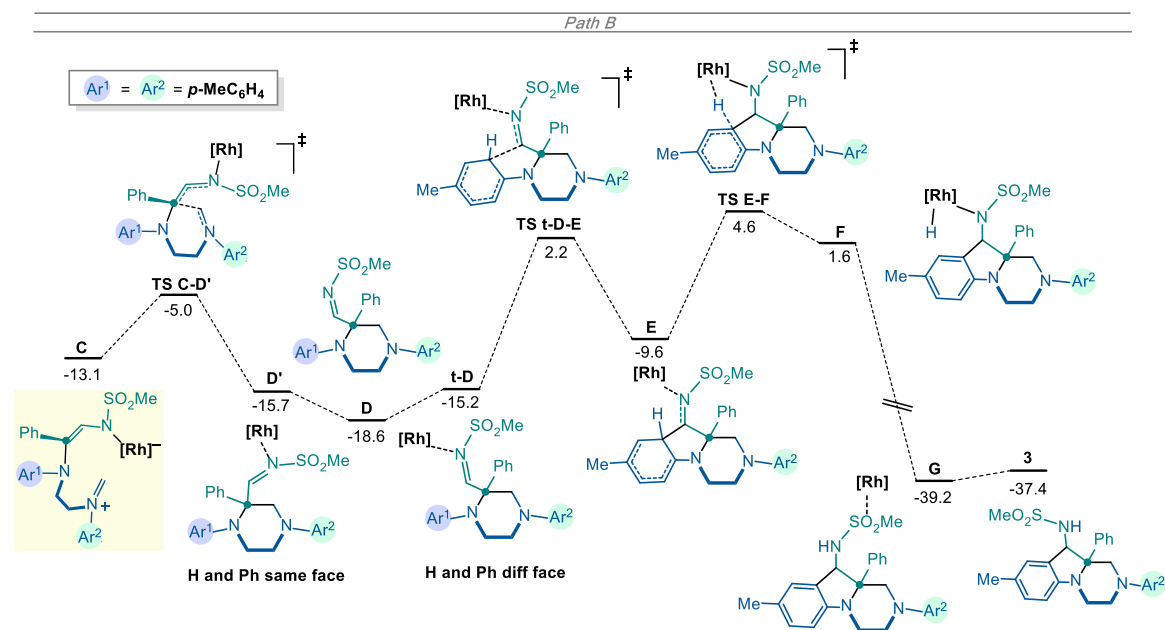

**Fig. S3.** Full Gibbs-energy profile for the formation of product **3** from intermediate **C** with the Me-Me (Ar<sup>1</sup>, Ar<sup>2</sup> EDGs) imidazolidine catalyzed by Rh<sub>2</sub>(Piv)<sub>4</sub>. Energies in kcal·mol<sup>-1</sup>.

The full mechanism for the formation of the pyrazino-indoline **3** with the Me-Me imidazolidine catalyzed by Rh<sub>2</sub>(Piv)<sub>4</sub> is depicted in Fig. S3. Starting from intermediate **C**, the first step consists in the C-C cyclization process with a related barrier of 8.1 kcal·mol<sup>-1</sup>, to form intermediate **D'** found at 2.6 kcal·mol<sup>-1</sup> below **C**. Intermediate **D'** presents the H (on the imine) and the Ph group on the same face. **D'** is able to rearrange to place the H and the Ph in opposite faces, in **t-D**. This process is almost isoenergetic and can take place upon the decoordination/coordination of the Rh catalyst. Intermediate **D** after the release of the Rh catalyst is found 5.5 kcal·mol<sup>-1</sup> below intermediate **C**. From **t-D**, the reaction proceeds via a Friedel-Crafts process. The final product **3** is thus found at 37.4 kcal·mol<sup>-1</sup> below the initial reactants **A** (Fig. S1). The highest point of this process is related with the catalyst assisted proton transfer (**TS E-F**), with a barrier of 23.2 kcal·mol<sup>-1</sup> from intermediate **D**. We were not able to obtain the transition state connecting intermediate **F** and **G**. We assume that this step is barrierless considering the energy difference between the intermediates.

**Rh<sub>2</sub>(Piv)<sub>4</sub> with MeO-NO<sub>2</sub> imidazolidine – A to C**

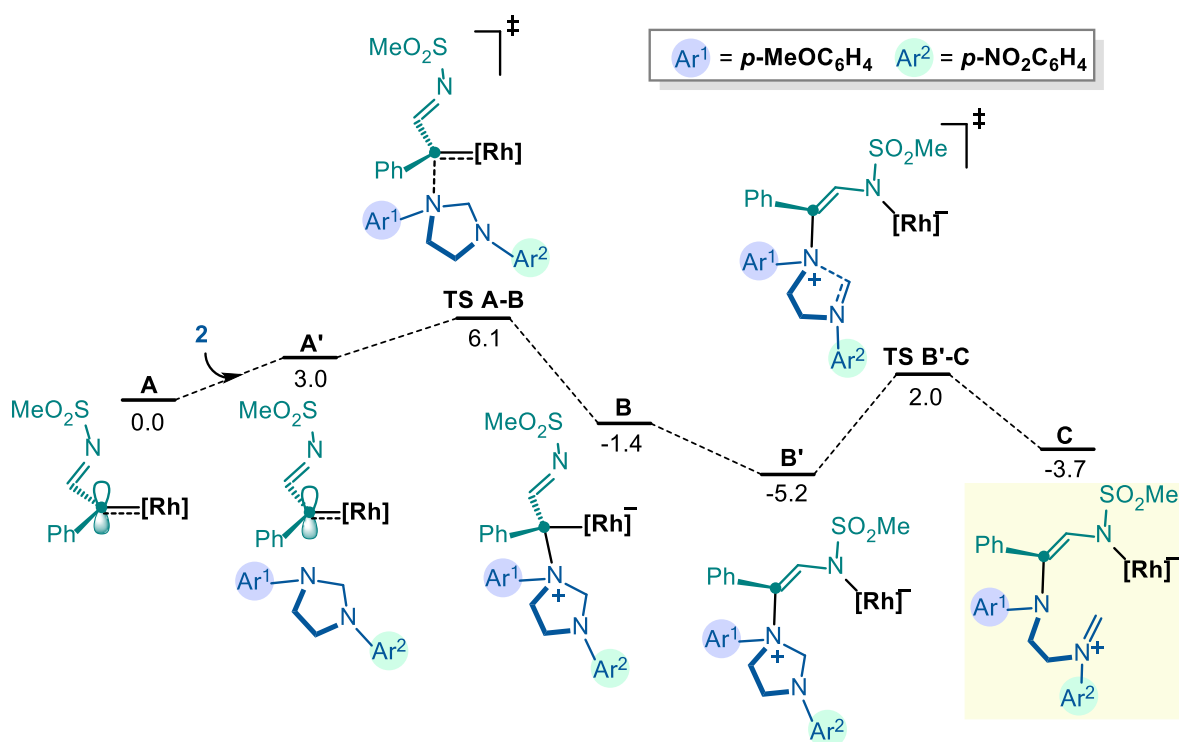

**Fig. S4.** Full Gibbs-energy profile for the MeO-NO<sub>2</sub> (Ar<sup>1</sup> EDG, Ar<sup>2</sup> EWG) imidazolidine ring opening by Rh<sub>2</sub>(Piv)<sub>4</sub> system. Energies in kcal·mol<sup>-1</sup>.

The results for the iminium intermediate **C** formation from **A** with the MeO-NO<sub>2</sub> imidazolidine, catalyzed by Rh<sub>2</sub>(Piv)<sub>4</sub> is depicted in Fig. S4. The mechanism is the same as explained in Fig. S1. The main difference between the two systems is the relative energy of **C**.

## Rh<sub>2</sub>(Piv)<sub>4</sub> with MeO-NO<sub>2</sub> imidazolidine – C to 4 and C to E

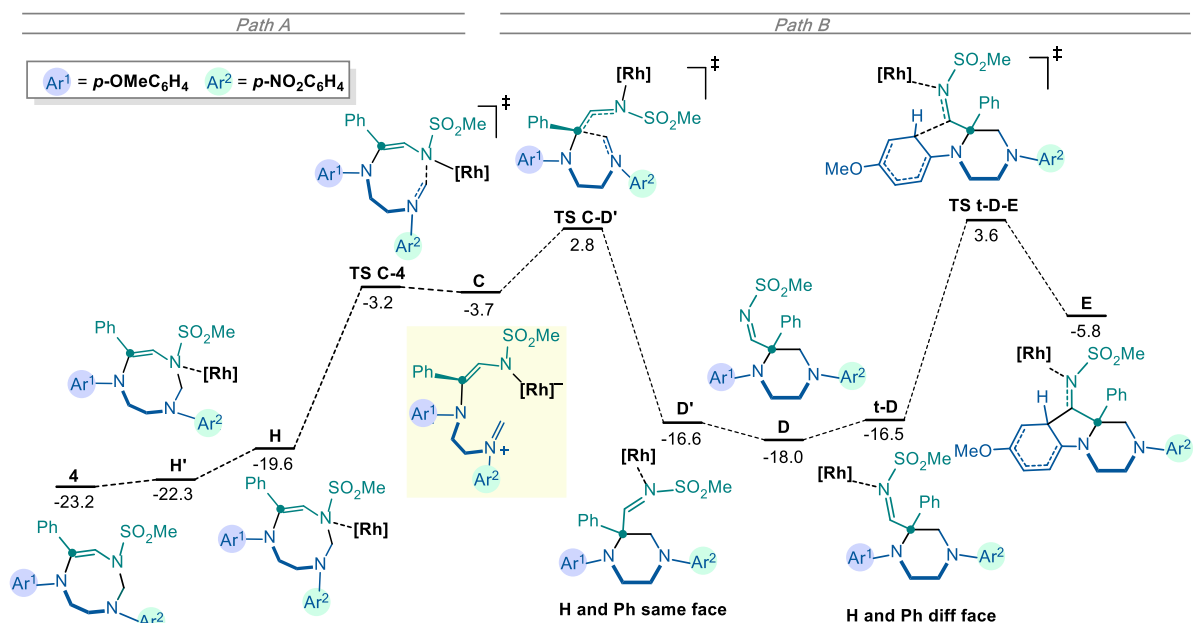

**Fig. S5.** Gibbs-energy profile for the 8-membered (left) or 6-membered (right) ring formation from the iminium intermediate **C**(MeO-NO<sub>2</sub>). Energies in kcal·mol<sup>-1</sup>.

The formation of hexahydro-1,3,6-triazocines product **4** with the MeO-NO<sub>2</sub> runs almost barrierless (Fig. S5, Path A). The activation barrier is only 0.5 kcal·mol<sup>-1</sup> to form the C–N bond. After rearrangement and catalyst liberation the final product **4** is found at 23.2 kcal·mol<sup>-1</sup> below the initial reactants. The process to achieve product **3** (Fig. S5, Path B) would be exactly the same than the one explained in Fig. S3. Nevertheless, we did not calculate the full mechanism since experimentally product **3** while using the MeO-NO<sub>2</sub> imidazolidine is not observed. This can be rationalized due to the energy found for **TS C-D'** which will make the reaction irreversible once product **4** is formed.

## Rh<sub>2</sub>(OAc)<sub>4</sub> with Me-Me imidazolidine – A to C

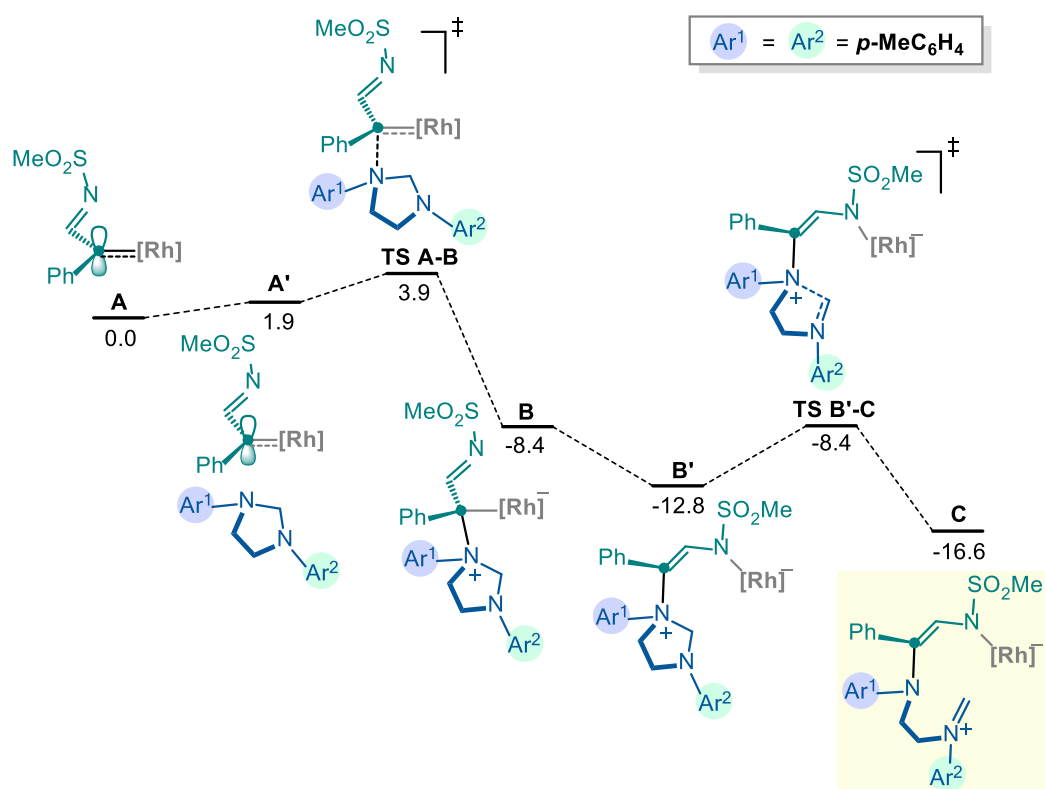

**Fig. S6.** Full Gibbs-energy profile for the Me-Me (Ar<sup>1</sup>, Ar<sup>2</sup> EDGs) imidazolidine ring opening by Rh<sub>2</sub>(OAc)<sub>4</sub> system. Energies in kcal·mol<sup>-1</sup>.

We have also calculated the formation of the iminium ion intermediate **C** with the Me-Me imidazolidine with the Rh<sub>2</sub>(OAc)<sub>4</sub> catalyst (Fig. S6). The results are very similar to that obtained with the Rh<sub>2</sub>(Piv)<sub>4</sub> catalyst and will not be further explained.

## Rh<sub>2</sub>(OAc)<sub>4</sub> with Me-Me imidazolidine – A to t-C

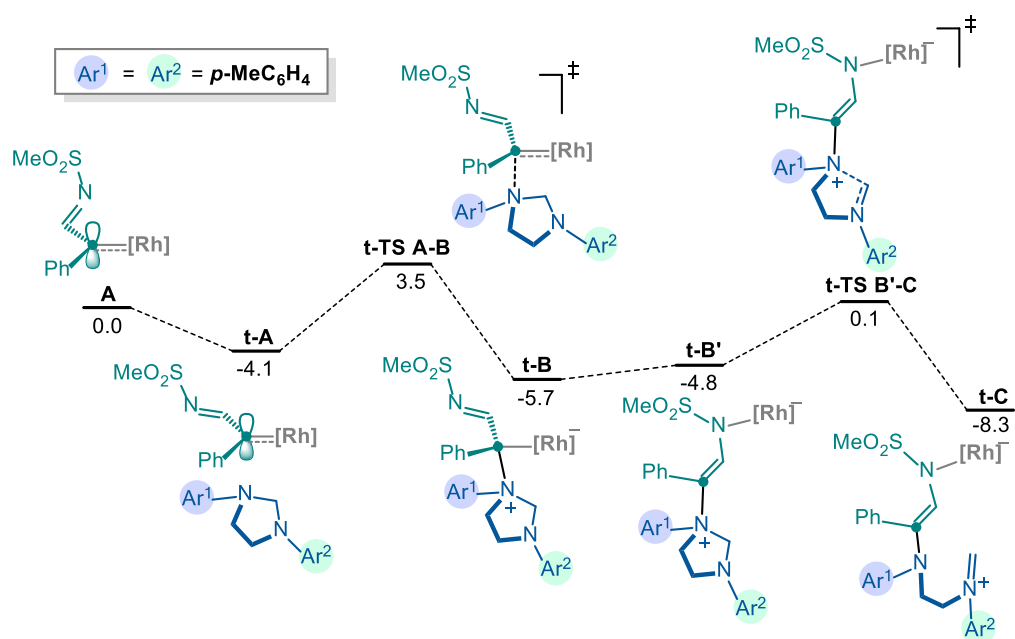

**Fig. S7.** Full Gibbs-energy profile for the Me-Me (Ar<sup>1</sup>, Ar<sup>2</sup> EDGs) imidazolidine ring opening by Rh<sub>2</sub>(OAc)<sub>4</sub> system with a “*trans*” disposition of the carbene moiety. Energies in kcal·mol<sup>-1</sup>.

We have also calculated the formation of the intermediate **t-C** with a *trans* disposition of the carbene moiety (Fig. S7); that is, with the N of the carbene and the N of the imidazolidine in a *trans* conformation. Although the adduct **t-A** is more stable than **A** in Fig. S6, the activation barrier for **t-TS A-B** is 3.7 kcal·mol<sup>-1</sup> higher than that of **TS A-B**, favouring the mechanism with the *cis* conformation.

### Rh<sub>2</sub>(OAc)<sub>4</sub> with Me-Me imidazolidine – A to B'2

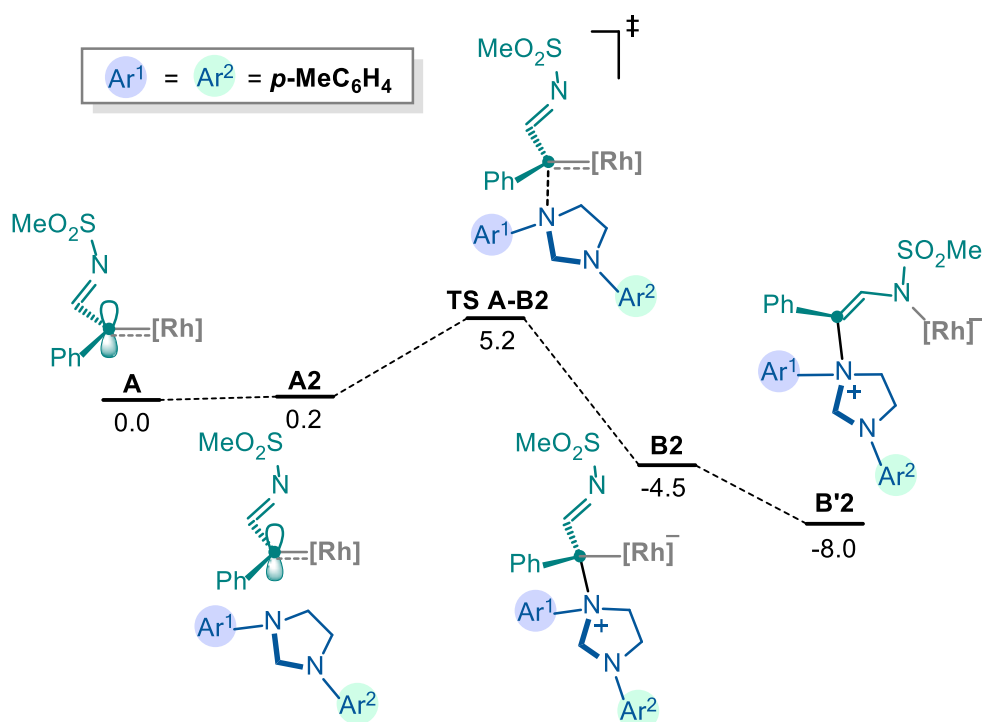

**Fig. S8.** Gibbs-energy profile for the Me-Me ( $Ar^1$ ,  $Ar^2$  EDGs) imidazolidine interaction with the Rh<sub>2</sub>(OAc)<sub>4</sub> carbene complex. Energies in kcal·mol<sup>-1</sup>.

We investigated the C—N formation step between the imidazolidine **2** and the carbene complex **A** with a different disposition of the imidazolidine. As shown in Fig. S8, the activation barrier for **TS A-B2** is only 5.2 kcal·mol<sup>-1</sup>. Nevertheless, the one with the normal disposition is lower by 1.3 kcal·mol<sup>-1</sup>, suggesting that the “normal” disposition will be the preferred one.



$\text{Rh}_2(\text{OAc})_4$  with Me-Me imidazolidine – C to 4 and C to D'

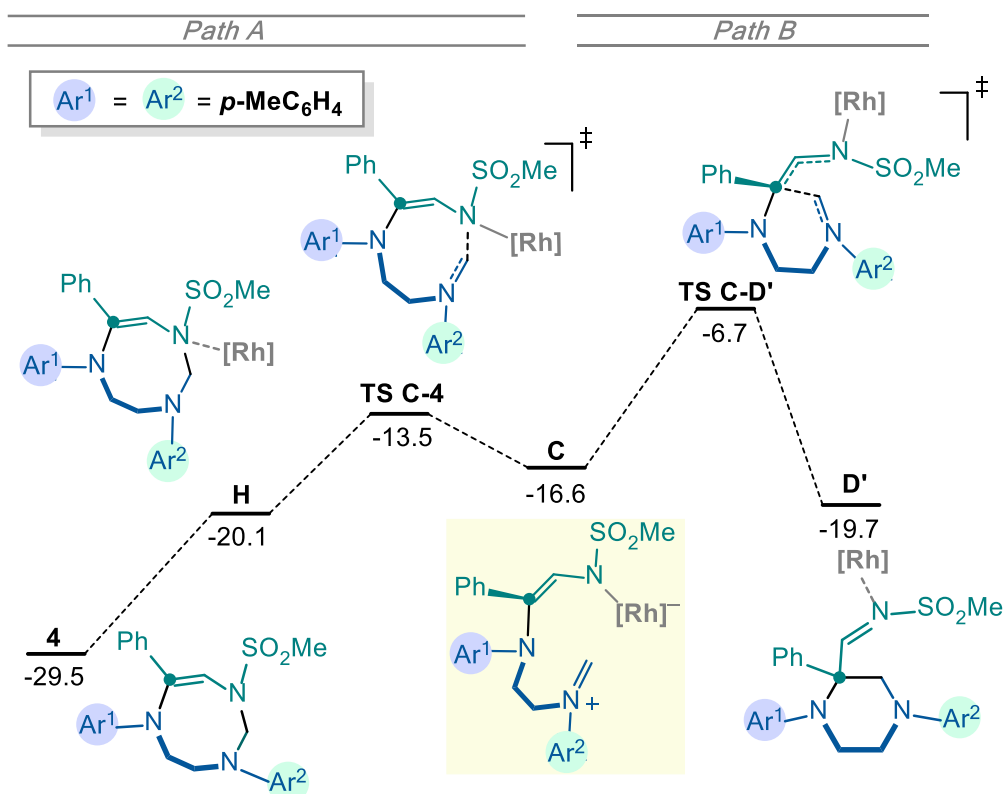

**Fig. S9** Gibbs-energy profile for the 8-membered (left) or 6-membered (right) ring formation from the iminium intermediate **C** catalyzed by  $\text{Rh}_2(\text{OAc})_4$  with the Me-Me imidazolidine. Energies in kcal·mol<sup>-1</sup>.

We have investigated the formation of product **4** and intermediate **D'** from intermediate **C** catalyzed with the  $\text{Rh}_2(\text{OAc})_4$  catalyst. The computed results show that product **4** can evolve backwards to form intermediate **D'** with a barrier of 22.8 kcal·mol<sup>-1</sup>, thus permitted at the reactions conditions. From **D'**, the system would advance towards the formation of product **3** following the same mechanism shown in Fig. S3.

## Rh<sub>2</sub>(OAc)<sub>4</sub> with MeO-NO<sub>2</sub> imidazolidine – A to C

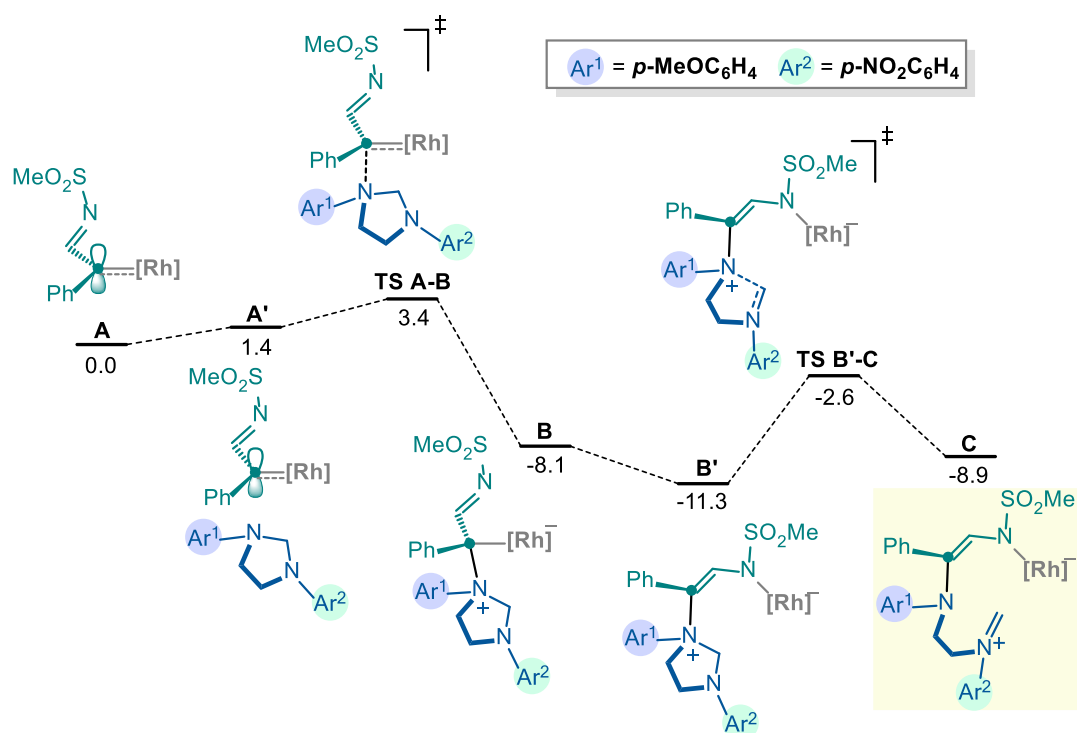

**Fig. S10.** Full Gibbs-energy profile for the MeO-NO<sub>2</sub> (Ar<sup>1</sup> EDG, Ar<sup>2</sup> EWG) imidazolidine ring opening by Rh<sub>2</sub>(OAc)<sub>4</sub> system. Energies in kcal·mol<sup>-1</sup>.

The computed results for the formation of the iminium ion intermediate **C** with the MeO-NO<sub>2</sub> imidazolidine with the Rh<sub>2</sub>(OAc)<sub>4</sub> catalyst do not show any remarkable difference with that obtained with the Rh<sub>2</sub>(Piv)<sub>4</sub> system. Interestingly, the energies of intermediate **C** with the different imidazolidines with the Rh<sub>2</sub>(OAc)<sub>4</sub> (-16.6 and -8.9 kcal·mol<sup>-1</sup> for the Me-Me and MeO-NO<sub>2</sub> imidazolidine, respectively) follow the same trends than that obtained with the real catalyst (-13.1 and -3.7 kcal·mol<sup>-1</sup> for the Me-Me and MeO-NO<sub>2</sub> imidazolidine, respectively). This clearly suggests that the selectivity of the reactions is triggered by the nature of the substituents on the imidazolidine.

$\text{Rh}_2(\text{OAc})_4$  with MeO-NO<sub>2</sub> imidazolidine – C to 4 and C to D'

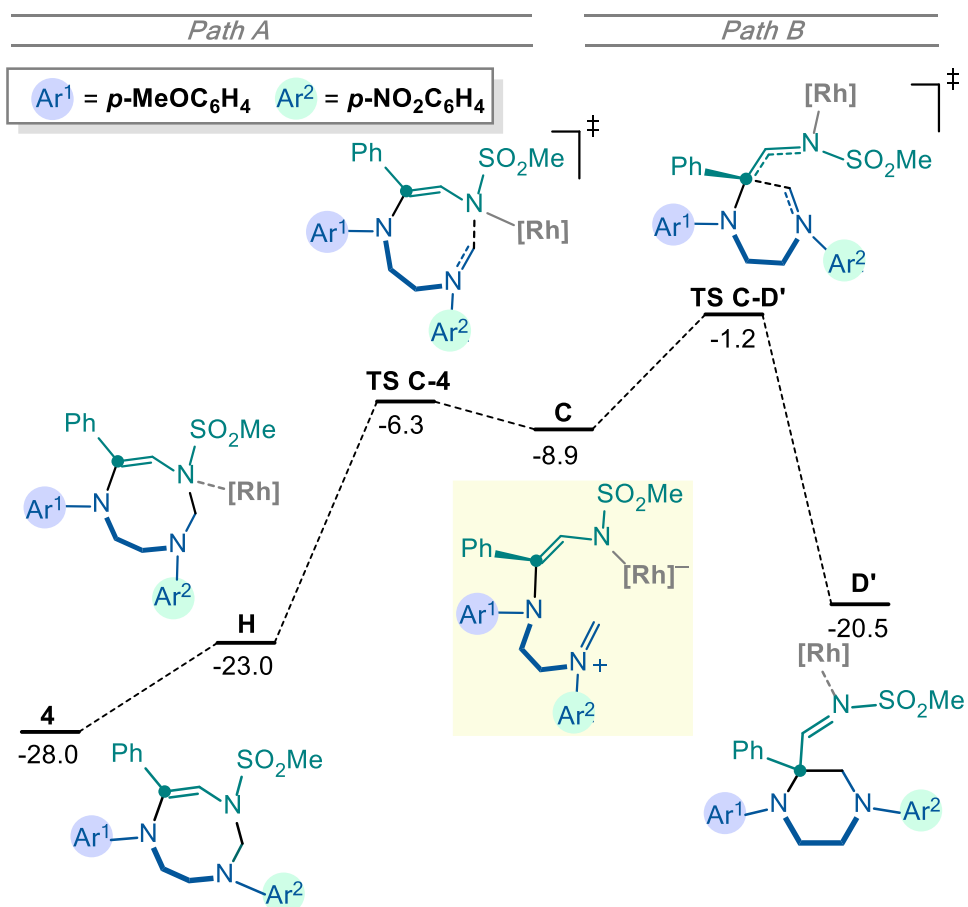

**Fig. S11** Gibbs-energy profile for the 8-membered (left) or 6-membered (right) ring formation from the iminium intermediate **C** catalyzed by  $\text{Rh}_2(\text{OAc})_4$  with the MeO-NO<sub>2</sub> imidazolidine. Energies in kcal·mol<sup>-1</sup>.

We have investigated the formation of product **4** and intermediate **D'** from intermediate **C** catalyzed with the  $\text{Rh}_2(\text{OAc})_4$  catalyst with the MeO-NO<sub>2</sub> imidazolidine. In this case, the computed results show that product **4** is formed preferentially and it cannot evolve backwards to form intermediate **D'**. The activation barrier to form **D'** is 26.8 kcal·mol<sup>-1</sup> from product **4** to TS C-D', thus not permitted at the reaction conditions.

### Rh<sub>2</sub>(OAc)<sub>4</sub> with MeO-NO<sub>2</sub> imidazolidine – A to t-B (N-selectivity)

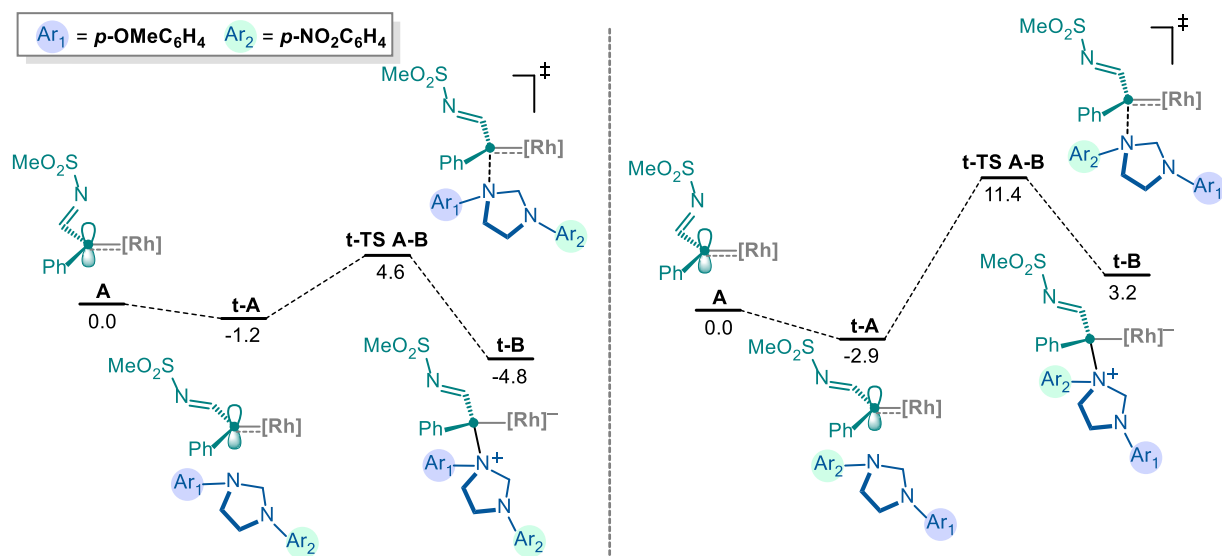

**Fig. S12** Gibbs-energy profile for the formation of **t-B** from **A** with the MeO-NO<sub>2</sub> imidazolidine catalyzed by Rh<sub>2</sub>(OAc)<sub>4</sub>. Left: Carbene attack on the N bearing the *p*-MeOC<sub>6</sub>H<sub>4</sub>. Right: carbene attack on the N bearing the *p*-NO<sub>2</sub>C<sub>6</sub>H<sub>4</sub>. Energies in kcal·mol<sup>-1</sup>.

In order to check the N attack selectivity, we decided to compute the first step of the reaction with the MeO-NO<sub>2</sub> imidazolidine catalyzed by Rh<sub>2</sub>(OAc)<sub>4</sub>. The results are shown in Fig. S12. We can clearly see that while the attack on the N bearing the *p*-MeOC<sub>6</sub>H<sub>4</sub> has a barrier of 5.8 kcal·mol<sup>-1</sup> (Fig. S12, left), the attack on the N bearing the *p*-NO<sub>2</sub>C<sub>6</sub>H<sub>4</sub> has a barrier of 14.3 kcal·mol<sup>-1</sup> (Fig. S12, right). This demonstrates the selectivity of the carbene attack towards the electron rich N of the imidazolidine.

**Rh<sub>2</sub>(Piv)<sub>4</sub> with Me-Me imidazolidine –diastereomeric product formation, Major vs Minor**

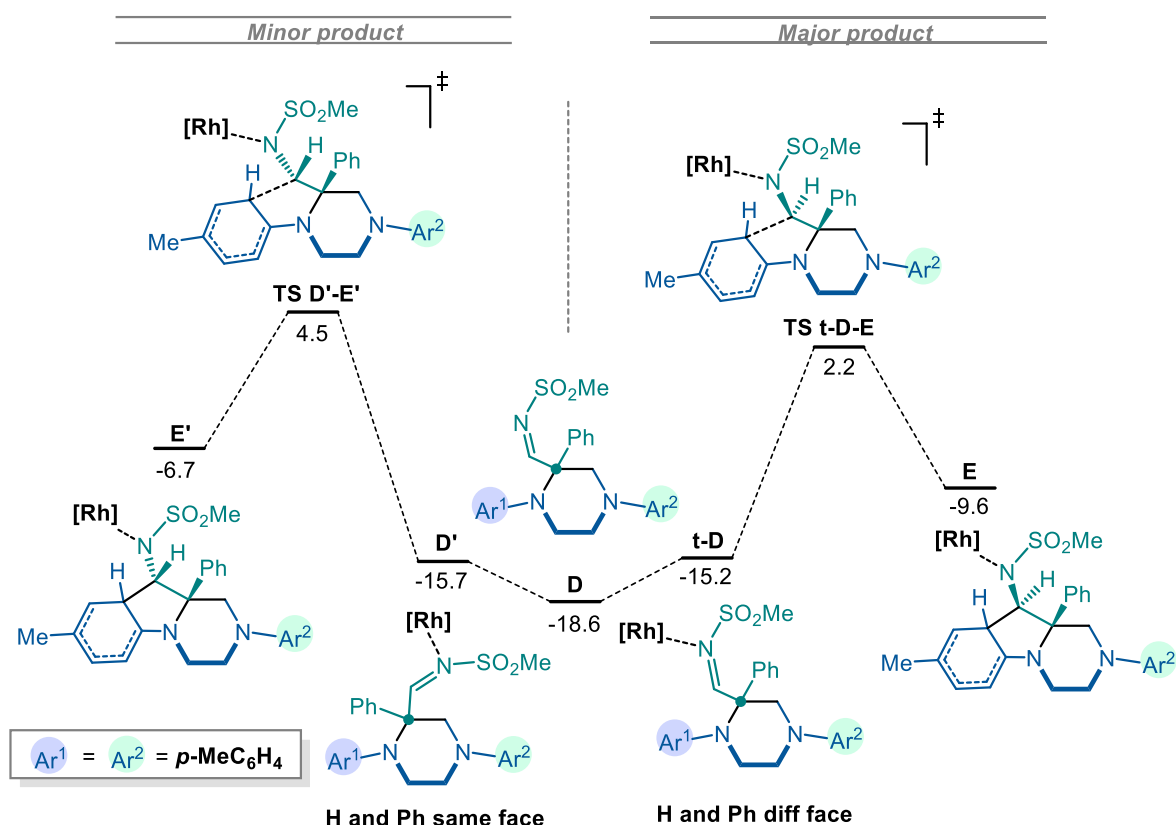

**Fig. S13** Gibbs-energy profile for the formation of **E** and **E'** from **D** with the Me-Me imidazolidine catalyzed by Rh<sub>2</sub>(Piv)<sub>4</sub>. Left: formation pathway for the minor product. Right: formation pathway for the major product. Energies in kcal·mol<sup>-1</sup>.

The final Friedel-Crafts reaction leads to the formation of a diastereomeric mixture of products with, somewhat surprisingly, a predominance for the *cis*-adduct over the *trans*. We investigated the initial step for the formation of (i, left) the minor product from intermediate **D'** to compare it to (ii, right) the formation of the major product. As shown in Fig. S13, **TS D'-E'** is 2.3 kcal·mol<sup>-1</sup> higher than **TS t-D-E**, in agreement with the experimental results. However, the rationale for the preferred *cis* selectivity is not trivial. We theorize that the steric clash between the organic moiety, that is, the skeleton of the imidazolidine; and the ligands in the Rh<sub>2</sub>(Piv)<sub>4</sub> catalyst is larger in the **D'** disposition than in the **t-D** disposition.

### 13. Computational details

All calculations were carried out using Gaussian09 (Rev. D01) package<sup>8</sup> at the B3LYP-D3 level of theory.<sup>9</sup> Optimizations and frequency calculations were ran using the basis set 6-31G\*<sup>10</sup> for light atoms and LANL2DZ<sup>11</sup> and its corresponding pseudopotential for the Rh atom; in dichloromethane solution ( $\epsilon = 8.93$ ), using the SMD model.<sup>12</sup> The potential energies for the Rh<sub>2</sub>(Piv)<sub>4</sub> system were further refined with larger basis set: 6-311++G\*\*<sup>13</sup> for light atoms and LANL2TZ(f)<sup>14</sup> for the Rh. All stationary points were assigned to a minima (zero imaginary frequencies) or transition state (one imaginary frequency) by frequency analysis. All the reports energies are Gibbs free energies in solution calculated at 298 K and 1 atm in kcal·mol<sup>-1</sup>.

## 14. XYZ Coordinates

### A-OAc-Me-Me

Energy (POTENTIAL) = -2084.85010457 Eh

| Atom | X       | Y       | Z       |
|------|---------|---------|---------|
| S    | -7.6917 | 3.4652  | 0.2331  |
| O    | -9.1054 | 3.4975  | 0.6432  |
| O    | -7.1935 | 2.2799  | -0.4932 |
| N    | -6.7487 | 3.7972  | 1.6288  |
| C    | -5.2842 | 2.8822  | 3.2539  |
| C    | -5.9180 | 2.8620  | 1.9556  |
| H    | -5.7776 | 1.9567  | 1.3515  |
| C    | -4.2749 | 3.8061  | 3.6202  |
| C    | -2.7127 | 5.5831  | 3.0152  |
| H    | -2.2754 | 6.2446  | 2.2738  |
| C    | -3.7014 | 4.6846  | 2.6514  |
| H    | -4.0440 | 4.6398  | 1.6230  |
| C    | -3.8120 | 3.8791  | 4.9673  |
| H    | -4.2476 | 3.2246  | 5.7091  |
| C    | -2.8298 | 4.7913  | 5.3201  |
| H    | -2.4865 | 4.8498  | 6.3484  |
| C    | -2.2781 | 5.6373  | 4.3483  |
| H    | -1.5033 | 6.3449  | 4.6306  |
| C    | -7.3310 | 4.9388  | -0.7252 |
| H    | -7.5957 | 5.8152  | -0.1298 |
| H    | -6.2677 | 4.9432  | -0.9764 |
| H    | -7.9391 | 4.8927  | -1.6328 |
| Rh   | -6.1091 | 1.3803  | 4.3459  |
| Rh   | -7.0846 | -0.4742 | 5.6415  |
| O    | -8.0004 | 1.7176  | 3.5879  |
| O    | -8.9073 | -0.0063 | 4.7534  |
| O    | -5.1894 | -0.8100 | 6.4250  |
| O    | -4.2857 | 0.8801  | 5.2057  |
| O    | -5.7773 | 0.0048  | 2.8275  |
| O    | -6.6528 | -1.7114 | 4.0281  |
| O    | -6.5315 | 2.6066  | 5.9607  |
| O    | -7.4525 | 0.9062  | 7.1505  |
| C    | -8.9713 | 0.9616  | 3.9357  |
| C    | -7.1063 | 2.1140  | 6.9939  |
| C    | -4.2232 | -0.0831 | 6.0463  |
| C    | -6.1311 | -1.2156 | 2.9860  |

|   |          |         |        |
|---|----------|---------|--------|
| C | -7.4048  | 3.0905  | 8.1045 |
| C | -2.8541  | -0.3663 | 6.6152 |
| C | -5.9070  | -2.1203 | 1.7997 |
| C | -10.3110 | 1.2927  | 3.3265 |
| H | -6.5091  | 3.6757  | 8.3349 |
| H | -8.1797  | 3.7879  | 7.7654 |
| H | -7.7530  | 2.5678  | 8.9973 |
| H | -10.8825 | 1.8930  | 4.0453 |
| H | -10.1770 | 1.8729  | 2.4108 |
| H | -10.8724 | 0.3755  | 3.1290 |
| H | -4.8715  | -2.0322 | 1.4558 |
| H | -6.5581  | -1.7967 | 0.9794 |
| H | -6.1306  | -3.1577 | 2.0549 |
| H | -2.4265  | 0.5561  | 7.0210 |
| H | -2.1958  | -0.7110 | 5.8097 |
| H | -2.9066  | -1.1295 | 7.3939 |

### A\_-OAc-Me-Me

Energy (POTENTIAL) = -2854.27317456 Eh

| Atom | X        | Y       | Z       |
|------|----------|---------|---------|
| S    | -5.5911  | 1.9112  | -0.3511 |
| O    | -6.9455  | 1.6181  | -0.8558 |
| O    | -4.6681  | 0.7823  | -0.1142 |
| N    | -10.1559 | 4.0857  | 1.7969  |
| N    | -5.7918  | 2.8869  | 1.0350  |
| C    | -13.2926 | 1.2541  | 1.3968  |
| C    | -13.5418 | 2.5662  | 1.8216  |
| H    | -14.5634 | 2.8702  | 2.0427  |
| C    | -12.5197 | 3.5040  | 1.9632  |
| H    | -12.7662 | 4.5156  | 2.2702  |
| C    | -11.1777 | 3.1597  | 1.6831  |
| C    | -10.9209 | 1.8368  | 1.2517  |
| H    | -9.9092  | 1.5247  | 1.0190  |
| C    | -11.9607 | 0.9196  | 1.1133  |
| H    | -11.7253 | -0.0871 | 0.7725  |
| C    | -10.2551 | 5.2608  | 2.6709  |
| H    | -10.9497 | 5.0914  | 3.5018  |
| H    | -10.5965 | 6.1417  | 2.1115  |
| C    | -8.8071  | 5.4362  | 3.1750  |
| H    | -8.5390  | 6.4789  | 3.3441  |
| H    | -8.6588  | 4.8705  | 4.0978  |

|    |          |         |         |    |          |         |        |
|----|----------|---------|---------|----|----------|---------|--------|
| C  | -5.6987  | 2.9719  | 3.4052  | Rh | -7.6812  | -0.3952 | 5.6516 |
| C  | -5.3036  | 2.4100  | 2.1302  | O  | -8.4063  | 2.5391  | 4.8133 |
| H  | -4.7110  | 1.4876  | 2.1621  | O  | -9.4059  | 0.7536  | 5.7969 |
| C  | -8.7466  | 3.6572  | 1.7163  | O  | -5.8873  | -1.4144 | 5.3984 |
| H  | -8.4749  | 3.3050  | 0.7232  | O  | -4.9977  | 0.2694  | 4.1650 |
| H  | -8.5524  | 2.8468  | 2.4250  | O  | -7.4812  | 0.6763  | 2.7054 |
| C  | -5.2903  | 4.2493  | 3.8636  | O  | -8.3283  | -1.1167 | 3.8079 |
| C  | -5.4758  | 6.0713  | 5.4707  | O  | -5.8884  | 2.1238  | 6.2409 |
| H  | -5.9472  | 6.5189  | 6.3405  | O  | -6.9351  | 0.4703  | 7.3939 |
| C  | -5.8912  | 4.8294  | 5.0176  | C  | -9.4010  | 1.9410  | 5.3561 |
| H  | -6.6867  | 4.2939  | 5.5184  | C  | -6.1973  | 1.4971  | 7.3126 |
| C  | -7.4308  | 5.6875  | 1.1418  | C  | -4.9647  | -0.8893 | 4.7093 |
| C  | -7.6032  | 5.5238  | -0.2440 | C  | -8.0874  | -0.4486 | 2.7572 |
| H  | -8.2413  | 4.7381  | -0.6317 | C  | -5.5854  | 2.0281  | 8.5862 |
| C  | -6.9677  | 6.3792  | -1.1462 | C  | -3.6899  | -1.6706 | 4.5073 |
| H  | -7.1291  | 6.2283  | -2.2119 | C  | -8.5581  | -1.0161 | 1.4411 |
| C  | -6.1468  | 7.4314  | -0.7179 | C  | -10.6849 | 2.7274  | 5.4358 |
| C  | -5.9914  | 7.5989  | 0.6654  | H  | -5.5583  | 3.1210  | 8.5683 |
| C  | -6.6112  | 6.7472  | 1.5768  | H  | -6.1405  | 1.6743  | 9.4575 |
| H  | -6.4436  | 6.8853  | 2.6397  | H  | -4.5524  | 1.6652  | 8.6544 |
| C  | -4.2607  | 4.9700  | 3.1925  | H  | -10.4769 | 3.7864  | 5.6065 |
| H  | -3.8085  | 4.5465  | 2.3022  | H  | -11.2080 | 2.6330  | 4.4763 |
| C  | -3.8260  | 6.1942  | 3.6794  | H  | -11.3280 | 2.3330  | 6.2254 |
| H  | -3.0296  | 6.7300  | 3.1723  | H  | -8.2140  | -0.3997 | 0.6083 |
| C  | -4.4347  | 6.7462  | 4.8138  | H  | -9.6522  | -1.0634 | 1.4434 |
| H  | -5.3599  | 8.4021  | 1.0406  | H  | -8.1803  | -2.0381 | 1.3326 |
| N  | -7.9847  | 4.8261  | 2.1148  | H  | -2.8734  | -1.1663 | 5.0368 |
| H  | -4.1004  | 7.7105  | 5.1866  | H  | -3.4347  | -1.6897 | 3.4431 |
| C  | -4.8060  | 3.0982  | -1.4428 | H  | -3.7950  | -2.6888 | 4.8862 |
| H  | -5.4312  | 3.9926  | -1.4889 |    |          |         |        |
| H  | -3.8165  | 3.3360  | -1.0449 |    |          |         |        |
| H  | -4.7223  | 2.6293  | -2.4270 |    |          |         |        |
| C  | -14.4041 | 0.2385  | 1.2690  |    |          |         |        |
| H  | -14.2230 | -0.4525 | 0.4371  |    |          |         |        |
| H  | -14.5041 | -0.3721 | 2.1777  |    |          |         |        |
| H  | -15.3724 | 0.7232  | 1.0982  |    |          |         |        |
| C  | -5.4348  | 8.3272  | -1.7041 |    |          |         |        |
| H  | -5.9682  | 8.3747  | -2.6603 |    |          |         |        |
| H  | -5.3360  | 9.3496  | -1.3208 |    |          |         |        |
| H  | -4.4194  | 7.9640  | -1.9177 |    |          |         |        |
| Rh | -6.6627  | 1.4876  | 4.4252  |    |          |         |        |

  

| <b>A-B-ts-OAc-Me-Me</b>                       |          |        |         |
|-----------------------------------------------|----------|--------|---------|
| <b>Energy (POTENTIAL) = -2854.27217595 Eh</b> |          |        |         |
| Atom                                          | X        | Y      | Z       |
| S                                             | -5.3347  | 1.7176 | -0.3162 |
| O                                             | -6.4929  | 1.0387 | -0.9259 |
| O                                             | -4.2100  | 0.8900 | 0.1692  |
| N                                             | -10.1092 | 4.0565 | 1.8032  |
| N                                             | -5.9497  | 2.7514 | 0.8885  |
| C                                             | -13.3966 | 1.3778 | 1.5594  |
| C                                             | -13.5650 | 2.7077 | 1.9702  |
| H                                             | -14.5605 | 3.0631 | 2.2297  |



|   |          |         |         |    |          |         |         |
|---|----------|---------|---------|----|----------|---------|---------|
| C | -12.4942 | 3.5968  | 2.0521  | C  | -4.7114  | 2.9373  | -1.4759 |
| H | -12.6775 | 4.6234  | 2.3536  | H  | -5.5198  | 3.6297  | -1.7194 |
| C | -11.1837 | 3.1819  | 1.7271  | H  | -3.8775  | 3.4694  | -1.0121 |
| C | -11.0100 | 1.8455  | 1.2989  | H  | -4.3773  | 2.4008  | -2.3680 |
| H | -10.0268 | 1.4786  | 1.0276  | C  | -14.5587 | 0.4141  | 1.5060  |
| C | -12.0971 | 0.9766  | 1.2205  | H  | -14.4400 | -0.3164 | 0.6970  |
| H | -11.9245 | -0.0452 | 0.8871  | H  | -14.6562 | -0.1559 | 2.4410  |
| C | -10.1003 | 5.2024  | 2.7209  | H  | -15.5082 | 0.9389  | 1.3486  |
| H | -10.8061 | 5.0659  | 3.5474  | C  | -5.4531  | 8.3051  | -1.6095 |
| H | -10.3564 | 6.1318  | 2.1964  | H  | -6.0168  | 8.3884  | -2.5456 |
| C | -8.6492  | 5.2224  | 3.2341  | H  | -5.3508  | 9.3097  | -1.1835 |
| H | -8.2954  | 6.2223  | 3.4766  | H  | -4.4427  | 7.9597  | -1.8696 |
| H | -8.5525  | 4.5781  | 4.1053  | Rh | -6.8145  | 1.5844  | 4.3303  |
| C | -5.9502  | 3.1973  | 3.2782  | Rh | -7.6401  | -0.4064 | 5.5334  |
| C | -5.4401  | 2.6032  | 2.0624  | O  | -8.6780  | 2.4236  | 4.6880  |
| H | -4.6232  | 1.8895  | 2.2465  | O  | -9.4571  | 0.5759  | 5.7475  |
| C | -8.7430  | 3.5285  | 1.6713  | O  | -5.7816  | -1.2767 | 5.2246  |
| H | -8.5145  | 3.2190  | 0.6557  | O  | -5.0200  | 0.5532  | 4.1188  |
| H | -8.5934  | 2.6704  | 2.3252  | O  | -7.5029  | 0.6823  | 2.5965  |
| C | -5.3700  | 4.3806  | 3.8311  | O  | -8.2666  | -1.1508 | 3.6932  |
| C | -5.3425  | 6.1216  | 5.5357  | O  | -6.1442  | 2.2821  | 6.1691  |
| H | -5.7559  | 6.5620  | 6.4385  | O  | -6.9434  | 0.4719  | 7.2838  |
| C | -5.8876  | 4.9534  | 5.0231  | C  | -9.5870  | 1.7466  | 5.2815  |
| H | -6.7176  | 4.4703  | 5.5197  | C  | -6.3466  | 1.5893  | 7.2231  |
| C | -7.3386  | 5.5271  | 1.1744  | C  | -4.8980  | -0.6320 | 4.5847  |
| C | -7.5051  | 5.3883  | -0.2149 | C  | -8.0549  | -0.4690 | 2.6442  |
| H | -8.1097  | 4.5888  | -0.6241 | C  | -5.7799  | 2.1482  | 8.5062  |
| C | -6.9094  | 6.2891  | -1.0957 | C  | -3.5651  | -1.2960 | 4.3406  |
| H | -7.0704  | 6.1596  | -2.1639 | C  | -8.5080  | -1.0469 | 1.3262  |
| C | -6.1235  | 7.3589  | -0.6428 | C  | -10.9369 | 2.4090  | 5.3972  |
| C | -5.9687  | 7.4977  | 0.7416  | H  | -5.7772  | 3.2407  | 8.4819  |
| C | -6.5600  | 6.6056  | 1.6353  | H  | -6.3474  | 1.7858  | 9.3663  |
| H | -6.4063  | 6.7478  | 2.6982  | H  | -4.7426  | 1.8049  | 8.6057  |
| C | -4.2783  | 5.0256  | 3.1884  | H  | -10.8204 | 3.4739  | 5.6160  |
| H | -3.8825  | 4.6121  | 2.2659  | H  | -11.4535 | 2.3178  | 4.4346  |
| C | -3.7103  | 6.1714  | 3.7330  | H  | -11.5376 | 1.9260  | 6.1707  |
| H | -2.8669  | 6.6463  | 3.2408  | H  | -8.0561  | -0.5033 | 0.4937  |
| C | -4.2477  | 6.7258  | 4.8997  | H  | -9.6000  | -0.9688 | 1.2651  |
| H | -5.3697  | 8.3155  | 1.1366  | H  | -8.2455  | -2.1078 | 1.2775  |
| N | -7.8732  | 4.6128  | 2.1263  | H  | -2.7803  | -0.7336 | 4.8590  |
| H | -3.8147  | 7.6311  | 5.3165  | H  | -3.3384  | -1.2724 | 3.2696  |

H -3.5734 -2.3273 4.6978

**B-OAc-Me-Me**

**Energy (POTENTIAL) = -2854.29465230 Eh**

| Atom | X        | Y      | Z       |
|------|----------|--------|---------|
| S    | -5.1379  | 1.4538 | 0.0308  |
| O    | -5.9361  | 0.2674 | -0.3410 |
| O    | -3.8282  | 1.2199 | 0.6819  |
| N    | -9.9360  | 4.0608 | 1.8298  |
| N    | -6.1162  | 2.5170 | 0.8733  |
| C    | -13.5211 | 1.9495 | 0.9861  |
| C    | -13.5312 | 3.3166 | 1.3049  |
| H    | -14.4783 | 3.8521 | 1.3282  |
| C    | -12.3596 | 4.0141 | 1.5864  |
| H    | -12.4082 | 5.0758 | 1.8090  |
| C    | -11.1122 | 3.3570 | 1.5643  |
| C    | -11.0904 | 1.9844 | 1.2457  |
| H    | -10.1549 | 1.4354 | 1.2238  |
| C    | -12.2778 | 1.3073 | 0.9606  |
| H    | -12.2287 | 0.2479 | 0.7176  |
| C    | -9.9152  | 5.1974 | 2.7607  |
| H    | -10.7297 | 5.1459 | 3.4914  |
| H    | -9.9858  | 6.1486 | 2.2223  |
| C    | -8.5743  | 5.0397 | 3.4717  |
| H    | -8.1287  | 5.9724 | 3.7998  |
| H    | -8.6527  | 4.3399 | 4.3004  |
| C    | -6.4129  | 3.6839 | 3.0015  |
| C    | -5.6942  | 2.8926 | 2.0550  |
| H    | -4.7211  | 2.5562 | 2.4151  |
| C    | -8.7057  | 3.3080 | 1.9616  |
| H    | -8.3733  | 2.8371 | 1.0448  |
| H    | -8.7473  | 2.5588 | 2.7465  |
| C    | -5.5861  | 4.6116 | 3.8450  |
| C    | -5.2176  | 5.9349 | 5.8617  |
| H    | -5.5602  | 6.2516 | 6.8436  |
| C    | -5.9919  | 5.0422 | 5.1215  |
| H    | -6.9022  | 4.6517 | 5.5549  |
| C    | -7.3444  | 5.3321 | 1.3353  |
| C    | -7.5796  | 5.0501 | -0.0108 |
| H    | -8.0585  | 4.1347 | -0.3241 |
| C    | -7.1988  | 5.9719 | -0.9862 |

|    |          |         |         |
|----|----------|---------|---------|
| H  | -7.3941  | 5.7371  | -2.0293 |
| C  | -6.5814  | 7.1834  | -0.6525 |
| C  | -6.3698  | 7.4522  | 0.7056  |
| C  | -6.7464  | 6.5438  | 1.6940  |
| H  | -6.5572  | 6.7930  | 2.7290  |
| C  | -4.3568  | 5.0968  | 3.3543  |
| H  | -4.0293  | 4.8157  | 2.3576  |
| C  | -3.5635  | 5.9635  | 4.1078  |
| H  | -2.6195  | 6.3172  | 3.7013  |
| C  | -3.9964  | 6.3965  | 5.3627  |
| H  | -5.9047  | 8.3880  | 1.0045  |
| N  | -7.7014  | 4.3461  | 2.4239  |
| H  | -3.3891  | 7.0831  | 5.9467  |
| C  | -4.8574  | 2.4108  | -1.4666 |
| H  | -5.8230  | 2.6440  | -1.9200 |
| H  | -4.3254  | 3.3286  | -1.2055 |
| H  | -4.2560  | 1.7974  | -2.1431 |
| C  | -14.8053 | 1.2052  | 0.7047  |
| H  | -14.6110 | 0.2356  | 0.2332  |
| H  | -15.3709 | 1.0143  | 1.6273  |
| H  | -15.4640 | 1.7772  | 0.0398  |
| C  | -6.1427  | 8.1578  | -1.7173 |
| H  | -6.7317  | 8.0428  | -2.6333 |
| H  | -6.2354  | 9.1941  | -1.3744 |
| H  | -5.0890  | 7.9966  | -1.9826 |
| Rh | -6.8094  | 1.6074  | 4.3542  |
| Rh | -7.2501  | -0.4592 | 5.5918  |
| O  | -8.7258  | 2.2195  | 4.9083  |
| O  | -9.1552  | 0.2741  | 5.9891  |
| O  | -5.3403  | -1.0911 | 5.0684  |
| O  | -4.9342  | 0.8396  | 3.9492  |
| O  | -7.5770  | 0.6344  | 2.6933  |
| O  | -7.9610  | -1.2890 | 3.8282  |
| O  | -6.0457  | 2.3750  | 6.1249  |
| O  | -6.4979  | 0.4757  | 7.2845  |
| C  | -9.4855  | 1.4172  | 5.5519  |
| C  | -6.0446  | 1.6597  | 7.1788  |
| C  | -4.6183  | -0.3274 | 4.3527  |
| C  | -7.9587  | -0.5790 | 2.7736  |
| C  | -5.4082  | 2.2685  | 8.4052  |
| C  | -3.2505  | -0.8136 | 3.9431  |

|   |          |         |        |   |         |         |        |
|---|----------|---------|--------|---|---------|---------|--------|
| C | -8.4668  | -1.2002 | 1.4970 | H | -4.6440 | 3.7592  | 3.1944 |
| C | -10.9052 | 1.8796  | 5.7688 | C | -8.4401 | 4.9726  | 3.9602 |
| H | -5.5365  | 3.3537  | 8.4047 | H | -8.5972 | 4.8214  | 2.8995 |
| H | -5.8288  | 1.8336  | 9.3148 | H | -8.2443 | 4.0223  | 4.4509 |
| H | -4.3330  | 2.0515  | 8.3812 | C | -4.7303 | 5.8257  | 4.7165 |
| H | -10.9166 | 2.9294  | 6.0765 | C | -3.3057 | 7.7057  | 5.3142 |
| H | -11.4427 | 1.8041  | 4.8155 | H | -3.0657 | 8.7619  | 5.2251 |
| H | -11.4090 | 1.2613  | 6.5141 | C | -4.4014 | 7.1906  | 4.6206 |
| H | -7.8416  | -0.8696 | 0.6634 | H | -4.9890 | 7.8496  | 3.9922 |
| H | -9.4929  | -0.8559 | 1.3183 | C | -7.3233 | 7.0383  | 3.2282 |
| H | -8.4706  | -2.2899 | 1.5716 | C | -7.6736 | 8.3131  | 3.6610 |
| H | -2.4930  | -0.2898 | 4.5386 | H | -7.8674 | 8.5371  | 4.7019 |
| H | -3.0819  | -0.5646 | 2.8912 | C | -7.7678 | 9.3474  | 2.7253 |
| H | -3.1526  | -1.8889 | 4.1050 | H | -8.0371 | 10.3419 | 3.0710 |

**B\_-OAc-Me-Me**

**Energy (POTENTIAL) = -2854.30170042 Eh**

| Atom | X        | Y      | Z      |    |          |         |         |
|------|----------|--------|--------|----|----------|---------|---------|
| S    | -6.4765  | 2.7594 | 1.2415 | H  | -6.8008  | 5.7946  | 1.5340  |
| O    | -5.9937  | 3.9336 | 0.4664 | C  | -3.9257  | 4.9964  | 5.5228  |
| O    | -7.7225  | 2.1124 | 0.7935 | H  | -4.1928  | 3.9493  | 5.6242  |
| N    | -9.4756  | 5.7500 | 4.5940 | C  | -2.8203  | 5.5126  | 6.2009  |
| N    | -6.6767  | 3.2049 | 2.8169 | H  | -2.2128  | 4.8545  | 6.8166  |
| C    | -13.5651 | 4.6504 | 4.2265 | C  | -2.5098  | 6.8711  | 6.1047  |
| C    | -13.1196 | 5.4780 | 5.2624 | H  | -6.9879  | 7.6247  | -0.0888 |
| H    | -13.8348 | 5.8581 | 5.9886 | N  | -7.2129  | 5.8656  | 4.1749  |
| C    | -11.7751 | 5.8329 | 5.3972 | H  | -1.6563  | 7.2776  | 6.6406  |
| H    | -11.4814 | 6.4824 | 6.2151 | C  | -5.1534  | 1.5342  | 1.1525  |
| C    | -10.8158 | 5.3656 | 4.4799 | H  | -4.2479  | 1.9554  | 1.5951  |
| C    | -11.2548 | 4.5229 | 3.4359 | H  | -5.4706  | 0.6445  | 1.6950  |
| H    | -10.5517 | 4.1188 | 2.7164 | H  | -4.9849  | 1.3120  | 0.0950  |
| C    | -12.5994 | 4.1843 | 3.3205 | C  | -15.0176 | 4.2628  | 4.0801  |
| H    | -12.9033 | 3.5317 | 2.5045 | H  | -15.4237 | 4.5860  | 3.1125  |
| C    | -8.9482  | 6.3068 | 5.8376 | H  | -15.1510 | 3.1743  | 4.1324  |
| H    | -9.2480  | 5.7210 | 6.7183 | H  | -15.6336 | 4.7124  | 4.8664  |
| H    | -9.2958  | 7.3348 | 5.9759 | C  | -7.6576  | 10.2389 | 0.3531  |
| C    | -7.4266  | 6.2194 | 5.6505 | H  | -7.6608  | 11.2228 | 0.8328  |
| H    | -6.8727  | 7.1187 | 5.9046 | H  | -6.8385  | 10.2125 | -0.3748 |
| H    | -7.0116  | 5.3728 | 6.1912 | H  | -8.5939  | 10.1409 | -0.2121 |
| C    | -5.8689  | 5.1968 | 4.0016 | Rh | -6.9087  | 1.5821  | 4.4127  |
| C    | -5.6901  | 4.0555 | 3.3031 | Rh | -7.0661  | -0.1066 | 6.1661  |
|      |          |        |        | O  | -8.9603  | 1.8314  | 4.6047  |

|   |          |         |        |   |          |        |        |
|---|----------|---------|--------|---|----------|--------|--------|
| O | -9.0746  | 0.3910  | 6.3562 | C | -10.5283 | 6.1869 | 3.5889 |
| O | -5.0378  | -0.4672 | 5.8536 | C | -10.4619 | 6.2772 | 2.1922 |
| O | -4.8684  | 1.2313  | 4.3560 | H | -9.6075  | 5.8867 | 1.6516 |
| O | -7.2076  | 0.0525  | 3.0568 | C | -11.4789 | 6.9195 | 1.4924 |
| O | -7.5469  | -1.4823 | 4.6915 | H | -11.4038 | 6.9936 | 0.4100 |
| O | -6.6285  | 2.9785  | 5.9531 | C | -8.9912  | 6.1156 | 5.5977 |
| O | -6.5819  | 1.3664  | 7.5464 | H | -9.2416  | 5.4952 | 6.4628 |
| C | -9.5791  | 1.2325  | 5.5461 | H | -9.4324  | 7.1020 | 5.7344 |
| C | -6.4995  | 2.5708  | 7.1566 | C | -7.4329  | 6.1799 | 5.4429 |
| C | -4.3875  | 0.2792  | 5.0570 | H | -7.0526  | 7.1582 | 5.7383 |
| C | -7.4909  | -1.1178 | 3.4757 | H | -6.9729  | 5.4289 | 6.0781 |
| C | -6.2439  | 3.6274  | 8.2050 | C | -5.7123  | 5.1628 | 4.0124 |
| C | -2.9051  | 0.0345  | 4.9100 | C | -5.4822  | 4.0147 | 3.3371 |
| C | -7.8011  | -2.1449 | 2.4145 | H | -4.4407  | 3.6871 | 3.3261 |
| C | -11.0360 | 1.5877  | 5.7205 | C | -8.6571  | 4.6280 | 3.8651 |
| H | -5.4899  | 4.3358  | 7.8504 | H | -8.7499  | 4.2873 | 2.8442 |
| H | -7.1731  | 4.1818  | 8.3846 | H | -8.2019  | 3.9455 | 4.5646 |
| H | -5.9204  | 3.1710  | 9.1425 | C | -4.6233  | 5.7791 | 4.8095 |
| H | -11.1048 | 2.5785  | 6.1854 | C | -3.3336  | 7.7034 | 5.5588 |
| H | -11.5270 | 1.6498  | 4.7464 | H | -3.1523  | 8.7749 | 5.5344 |
| H | -11.5405 | 0.8577  | 6.3567 | C | -4.3751  | 7.1646 | 4.8034 |
| H | -7.0047  | -2.1506 | 1.6634 | H | -4.9895  | 7.8194 | 4.1935 |
| H | -8.7309  | -1.8633 | 1.9071 | C | -7.2046  | 6.8724 | 3.0517 |
| H | -7.9103  | -3.1392 | 2.8518 | C | -7.7923  | 8.1010 | 3.3623 |
| H | -2.3602  | 0.9494  | 5.1671 | H | -8.0642  | 8.3584 | 4.3779 |
| H | -2.6789  | -0.2022 | 3.8646 | C | -8.0537  | 9.0293 | 2.3489 |
| H | -2.5767  | -0.7842 | 5.5530 | H | -8.5216  | 9.9745 | 2.6125 |

**B-C-ts-OAc-Me-Me**

**Energy (POTENTIAL) = -2854.29327416 Eh**

| Atom | X        | Y      | Z      |   |         |        |         |
|------|----------|--------|--------|---|---------|--------|---------|
| S    | -6.0514  | 2.7217 | 1.2071 | C | -7.1272 | 7.5293 | 0.7268  |
| O    | -5.5073  | 3.8878 | 0.4607 | C | -6.8615 | 6.5945 | 1.7205  |
| O    | -7.2236  | 2.0377 | 0.6317 | H | -6.4063 | 5.6480 | 1.4545  |
| N    | -9.5214  | 5.5193 | 4.3606 | C | -3.8082 | 4.9556 | 5.6109  |
| N    | -6.4374  | 3.1866 | 2.7461 | H | -4.0225 | 3.8918 | 5.6584  |
| C    | -12.5791 | 7.4929 | 2.1500 | C | -2.7590 | 5.4968 | 6.3560  |
| C    | -12.6293 | 7.3891 | 3.5445 | H | -2.1407 | 4.8436 | 6.9665  |
| H    | -13.4709 | 7.8151 | 4.0850 | C | -2.5176 | 6.8729 | 6.3341  |
| C    | -11.6237 | 6.7369 | 4.2612 | H | -6.8623 | 7.2901 | -0.3007 |
| H    | -11.7008 | 6.6485 | 5.3407 | N | -7.0233 | 5.8297 | 4.0543  |
|      |          |        |        | H | -1.7064 | 7.2966 | 6.9203  |
|      |          |        |        | C | -4.6912 | 1.5338 | 1.2796  |
|      |          |        |        | H | -3.8454 | 1.9917 | 1.7980  |

|    |          |         |         |
|----|----------|---------|---------|
| H  | -5.0305  | 0.6419  | 1.8035  |
| H  | -4.4136  | 1.3015  | 0.2477  |
| C  | -13.6613 | 8.1973  | 1.3680  |
| H  | -13.2474 | 9.0190  | 0.7701  |
| H  | -14.1569 | 7.5119  | 0.6687  |
| H  | -14.4276 | 8.6148  | 2.0293  |
| C  | -8.0559  | 9.7408  | -0.0878 |
| H  | -8.4231  | 10.6920 | 0.3112  |
| H  | -7.1728  | 9.9478  | -0.7046 |
| H  | -8.8270  | 9.3391  | -0.7584 |
| Rh | -6.8292  | 1.5232  | 4.2703  |
| Rh | -7.2175  | -0.1666 | 5.9924  |
| O  | -8.8916  | 1.7135  | 4.1282  |
| O  | -9.2535  | 0.1642  | 5.7481  |
| O  | -5.1496  | -0.3672 | 6.1142  |
| O  | -4.7968  | 1.2259  | 4.5351  |
| O  | -6.8845  | -0.0244 | 2.8975  |
| O  | -7.2687  | -1.5928 | 4.4916  |
| O  | -6.7963  | 2.9241  | 5.8303  |
| O  | -7.1316  | 1.3385  | 7.4162  |
| C  | -9.6419  | 1.0169  | 4.8884  |
| C  | -6.9311  | 2.5328  | 7.0394  |
| C  | -4.4039  | 0.3591  | 5.3855  |
| C  | -7.0920  | -1.2195 | 3.2895  |
| C  | -6.8484  | 3.5993  | 8.1057  |
| C  | -2.9090  | 0.2106  | 5.5363  |
| C  | -7.1557  | -2.2736 | 2.2111  |
| C  | -11.1280 | 1.2285  | 4.7261  |
| H  | -5.9603  | 4.2172  | 7.9399  |
| H  | -7.7289  | 4.2492  | 8.0399  |
| H  | -6.8104  | 3.1509  | 9.1002  |
| H  | -11.3483 | 2.3005  | 4.7067  |
| H  | -11.4429 | 0.8075  | 3.7640  |
| H  | -11.6837 | 0.7431  | 5.5307  |
| H  | -6.3467  | -2.1227 | 1.4905  |
| H  | -8.1051  | -2.1691 | 1.6725  |
| H  | -7.0967  | -3.2751 | 2.6417  |
| H  | -2.5043  | 1.1224  | 5.9909  |
| H  | -2.4475  | 0.0997  | 4.5501  |
| H  | -2.6618  | -0.6471 | 6.1649  |

**C-OAc-Me-Me**

**Energy (POTENTIAL) = -2854.30755981 Eh**

| Atom | X        | Y       | Z       |
|------|----------|---------|---------|
| S    | -7.4398  | 2.9418  | 1.5555  |
| O    | -7.3493  | 4.1776  | 0.7344  |
| O    | -8.7034  | 2.1790  | 1.4765  |
| N    | -9.7806  | 5.2342  | 4.2182  |
| N    | -7.1916  | 3.2961  | 3.1508  |
| C    | -11.7072 | 7.4243  | 1.1313  |
| C    | -12.1852 | 7.4655  | 2.4499  |
| H    | -13.0550 | 8.0726  | 2.6869  |
| C    | -11.5625 | 6.7426  | 3.4660  |
| H    | -11.9449 | 6.7806  | 4.4816  |
| C    | -10.4485 | 5.9583  | 3.1593  |
| C    | -9.9583  | 5.8868  | 1.8558  |
| H    | -9.0690  | 5.3101  | 1.6301  |
| C    | -10.5937 | 6.6189  | 0.8545  |
| H    | -10.1972 | 6.5772  | -0.1567 |
| C    | -9.3131  | 5.9973  | 5.4083  |
| H    | -9.7313  | 5.5332  | 6.3050  |
| H    | -9.7223  | 6.9995  | 5.3168  |
| C    | -7.7674  | 6.0104  | 5.5052  |
| H    | -7.4925  | 6.8344  | 6.1822  |
| H    | -7.4372  | 5.0805  | 5.9665  |
| C    | -5.9516  | 5.2346  | 4.0410  |
| C    | -6.0214  | 4.0310  | 3.4284  |
| H    | -5.0791  | 3.5149  | 3.2525  |
| C    | -9.4680  | 3.9848  | 4.1000  |
| H    | -9.8067  | 3.4114  | 3.2473  |
| H    | -8.9779  | 3.4917  | 4.9243  |
| C    | -4.6692  | 5.6997  | 4.6339  |
| C    | -3.1699  | 7.4866  | 5.3485  |
| H    | -2.9602  | 8.5498  | 5.4359  |
| C    | -4.3710  | 7.0691  | 4.7740  |
| H    | -5.0761  | 7.8129  | 4.4199  |
| C    | -7.2633  | 7.1898  | 3.3693  |
| C    | -7.8830  | 8.3765  | 3.8028  |
| H    | -8.1936  | 8.4933  | 4.8347  |
| C    | -8.0930  | 9.4374  | 2.9170  |
| H    | -8.5861  | 10.3350 | 3.2849  |
| C    | -7.6801  | 9.3772  | 1.5833  |

|    |          |         |         |   |          |         |        |
|----|----------|---------|---------|---|----------|---------|--------|
| C  | -7.0255  | 8.2044  | 1.1702  | H | -5.9220  | 4.2437  | 8.0967 |
| C  | -6.8179  | 7.1344  | 2.0317  | H | -7.6630  | 4.0924  | 8.3690 |
| H  | -6.3566  | 6.2264  | 1.6636  | H | -6.5300  | 3.1208  | 9.3514 |
| C  | -3.7331  | 4.7668  | 5.1302  | H | -11.4594 | 1.1804  | 5.7100 |
| H  | -3.9694  | 3.7080  | 5.0972  | H | -11.3132 | -0.4280 | 4.9846 |
| C  | -2.5296  | 5.1873  | 5.6964  | H | -11.2517 | -0.2636 | 6.7558 |
| H  | -1.8267  | 4.4476  | 6.0720  | H | -6.3088  | -2.0834 | 1.6666 |
| C  | -2.2384  | 6.5501  | 5.8062  | H | -7.9836  | -2.4260 | 2.1179 |
| H  | -6.6854  | 8.1190  | 0.1397  | H | -6.6620  | -3.3395 | 2.8947 |
| N  | -7.1039  | 6.0757  | 4.2130  | H | -2.3100  | 1.3322  | 5.9266 |
| H  | -1.3045  | 6.8785  | 6.2548  | H | -2.4498  | 1.5089  | 4.1559 |
| C  | -6.0967  | 1.8835  | 0.9742  | H | -2.2661  | -0.1091 | 4.9035 |
| H  | -5.1478  | 2.4058  | 1.1181  |   |          |         |        |
| H  | -6.1225  | 0.9461  | 1.5284  |   |          |         |        |
| H  | -6.2669  | 1.7129  | -0.0925 |   |          |         |        |
| C  | -12.3442 | 8.2562  | 0.0460  |   |          |         |        |
| H  | -11.7981 | 9.2001  | -0.0875 |   |          |         |        |
| H  | -12.3306 | 7.7346  | -0.9174 |   |          |         |        |
| H  | -13.3823 | 8.5083  | 0.2873  |   |          |         |        |
| C  | -7.9460  | 10.5052 | 0.6146  |   |          |         |        |
| H  | -8.2453  | 11.4208 | 1.1370  |   |          |         |        |
| H  | -7.0604  | 10.7364 | 0.0095  |   |          |         |        |
| H  | -8.7528  | 10.2488 | -0.0864 |   |          |         |        |
| Rh | -7.0012  | 1.4426  | 4.5779  |   |          |         |        |
| Rh | -6.6878  | -0.2777 | 6.2841  |   |          |         |        |
| O  | -9.0482  | 1.2096  | 4.8591  |   |          |         |        |
| O  | -8.7539  | -0.3805 | 6.4507  |   |          |         |        |
| O  | -4.6415  | -0.0690 | 6.0139  |   |          |         |        |
| O  | -4.9303  | 1.4990  | 4.4033  |   |          |         |        |
| O  | -7.0371  | -0.1013 | 3.1912  |   |          |         |        |
| O  | -6.7393  | -1.6966 | 4.7773  |   |          |         |        |
| O  | -6.9691  | 2.8373  | 6.1146  |   |          |         |        |
| O  | -6.6351  | 1.2481  | 7.6975  |   |          |         |        |
| C  | -9.4732  | 0.3599  | 5.7097  |   |          |         |        |
| C  | -6.7787  | 2.4501  | 7.3174  |   |          |         |        |
| C  | -4.2108  | 0.7565  | 5.1497  |   |          |         |        |
| C  | -6.9003  | -1.3091 | 3.5773  |   |          |         |        |
| C  | -6.7176  | 3.5389  | 8.3609  |   |          |         |        |
| C  | -2.7133  | 0.8840  | 5.0111  |   |          |         |        |
| C  | -6.9581  | -2.3654 | 2.5010  |   |          |         |        |
| C  | -10.9713 | 0.2071  | 5.8112  |   |          |         |        |

  

| <b>C-4-ts-OAc-Me-Me</b>                       |          |        |         |
|-----------------------------------------------|----------|--------|---------|
| <b>Energy (POTENTIAL) = -2854.30239020 Eh</b> |          |        |         |
| Atom                                          | X        | Y      | Z       |
| S                                             | -7.4314  | 3.1914 | 1.5245  |
| O                                             | -7.0885  | 4.4121 | 0.7626  |
| O                                             | -8.7353  | 2.5528 | 1.2689  |
| N                                             | -9.5782  | 5.2118 | 4.0251  |
| N                                             | -7.3654  | 3.5143 | 3.2016  |
| C                                             | -11.8301 | 7.1367 | 0.9707  |
| C                                             | -12.3526 | 6.9603 | 2.2613  |
| H                                             | -13.3507 | 7.3262 | 2.4908  |
| C                                             | -11.6183 | 6.3143 | 3.2542  |
| H                                             | -12.0404 | 6.1756 | 4.2458  |
| C                                             | -10.3326 | 5.8358 | 2.9732  |
| C                                             | -9.7954  | 6.0015 | 1.6963  |
| H                                             | -8.7897  | 5.6690 | 1.4784  |
| C                                             | -10.5474 | 6.6392 | 0.7081  |
| H                                             | -10.1140 | 6.7673 | -0.2811 |
| C                                             | -9.3305  | 5.9890 | 5.2550  |
| H                                             | -9.8149  | 5.4987 | 6.1075  |
| H                                             | -9.8064  | 6.9574 | 5.1143  |
| C                                             | -7.8254  | 6.1510 | 5.5573  |
| H                                             | -7.6998  | 6.9885 | 6.2595  |
| H                                             | -7.4589  | 5.2519 | 6.0544  |
| C                                             | -5.9732  | 5.3600 | 4.1601  |
| C                                             | -6.1567  | 4.1652 | 3.5640  |
| H                                             | -5.2718  | 3.5531 | 3.4210  |
| C                                             | -9.1117  | 3.9579 | 3.9356  |

|    |          |         |         |   |          |         |        |
|----|----------|---------|---------|---|----------|---------|--------|
| H  | -9.6081  | 3.3044  | 3.2322  | O | -5.0445  | 1.5025  | 4.3022 |
| H  | -8.8337  | 3.5281  | 4.8855  | O | -7.2622  | -0.0630 | 3.2014 |
| C  | -4.6440  | 5.7046  | 4.7356  | O | -6.8317  | -1.6836 | 4.7276 |
| C  | -2.9957  | 7.3670  | 5.4164  | O | -6.9282  | 2.8268  | 6.1446 |
| H  | -2.7036  | 8.4105  | 5.5033  | O | -6.5280  | 1.2112  | 7.6822 |
| C  | -4.2408  | 7.0460  | 4.8751  | C | -9.4912  | 0.3592  | 5.8789 |
| H  | -4.8997  | 7.8426  | 4.5473  | C | -6.6595  | 2.4232  | 7.3263 |
| C  | -7.1903  | 7.3814  | 3.4787  | C | -4.2765  | 0.7569  | 4.9965 |
| C  | -7.9304  | 8.5238  | 3.8430  | C | -7.0937  | -1.2793 | 3.5511 |
| H  | -8.3578  | 8.6097  | 4.8356  | C | -6.4704  | 3.4984  | 8.3660 |
| C  | -8.1210  | 9.5683  | 2.9359  | C | -2.7921  | 0.8926  | 4.7705 |
| H  | -8.7088  | 10.4294 | 3.2480  | C | -7.2346  | -2.3135 | 2.4634 |
| C  | -7.5763  | 9.5393  | 1.6478  | C | -10.9778 | 0.2287  | 6.0948 |
| C  | -6.8107  | 8.4134  | 1.3055  | H | -5.6217  | 4.1269  | 8.0735 |
| C  | -6.6167  | 7.3573  | 2.1892  | H | -7.3596  | 4.1364  | 8.4012 |
| H  | -6.0547  | 6.4877  | 1.8715  | H | -6.2867  | 3.0639  | 9.3502 |
| C  | -3.7703  | 4.6991  | 5.2000  | H | -11.4264 | 1.2215  | 6.1963 |
| H  | -4.0840  | 3.6610  | 5.1666  | H | -11.4218 | -0.2492 | 5.2136 |
| C  | -2.5244  | 5.0232  | 5.7373  | H | -11.1924 | -0.3754 | 6.9783 |
| H  | -1.8711  | 4.2292  | 6.0908  | H | -6.5993  | -2.0435 | 1.6138 |
| C  | -2.1269  | 6.3589  | 5.8443  | H | -8.2727  | -2.3211 | 2.1122 |
| H  | -6.3643  | 8.3528  | 0.3148  | H | -6.9664  | -3.3056 | 2.8308 |
| N  | -7.0272  | 6.3024  | 4.3528  | H | -2.3281  | 1.2857  | 5.6822 |
| H  | -1.1589  | 6.6119  | 6.2684  | H | -2.5833  | 1.5646  | 3.9364 |
| C  | -6.1263  | 2.0034  | 1.1650  | H | -2.3577  | -0.0934 | 4.5770 |
| H  | -5.1650  | 2.4064  | 1.4871  |   |          |         |        |
| H  | -6.3524  | 1.0590  | 1.6577  |   |          |         |        |
| H  | -6.1346  | 1.8896  | 0.0770  |   |          |         |        |
| C  | -12.6141 | 7.8735  | -0.0887 |   |          |         |        |
| H  | -12.3189 | 7.5611  | -1.0963 |   |          |         |        |
| H  | -13.6918 | 7.7068  | 0.0195  |   |          |         |        |
| H  | -12.4444 | 8.9569  | -0.0209 |   |          |         |        |
| C  | -7.8241  | 10.6499 | 0.6544  |   |          |         |        |
| H  | -8.6262  | 10.3873 | -0.0499 |   |          |         |        |
| H  | -8.1233  | 11.5779 | 1.1551  |   |          |         |        |
| H  | -6.9303  | 10.8631 | 0.0554  |   |          |         |        |
| Rh | -7.0967  | 1.4479  | 4.6103  |   |          |         |        |
| Rh | -6.6797  | -0.2910 | 6.2501  |   |          |         |        |
| O  | -9.1180  | 1.2216  | 5.0158  |   |          |         |        |
| O  | -8.7250  | -0.4005 | 6.5516  |   |          |         |        |
| O  | -4.6550  | -0.0815 | 5.8741  |   |          |         |        |

  

| <b>H-OAc-Me-Me</b>                            |          |        |        |
|-----------------------------------------------|----------|--------|--------|
| <b>Energy (POTENTIAL) = -2854.31360594 Eh</b> |          |        |        |
| Atom                                          | X        | Y      | Z      |
| S                                             | -7.7355  | 3.4953 | 1.6933 |
| O                                             | -7.5282  | 4.7891 | 1.0280 |
| O                                             | -8.9991  | 2.7732 | 1.5024 |
| N                                             | -9.3300  | 5.4445 | 3.8688 |
| N                                             | -7.5537  | 3.7005 | 3.4441 |
| C                                             | -12.0636 | 6.3813 | 0.7308 |
| C                                             | -12.1655 | 5.1726 | 1.4286 |
| H                                             | -12.9547 | 4.4702 | 1.1687 |
| C                                             | -11.2869 | 4.8503 | 2.4665 |
| H                                             | -11.4151 | 3.9097 | 2.9925 |
| C                                             | -10.2541 | 5.7277 | 2.8235 |
| C                                             | -10.1351 | 6.9364 | 2.1151 |

|   |          |         |        |    |          |         |         |
|---|----------|---------|--------|----|----------|---------|---------|
| H | -9.3224  | 7.6125  | 2.3552 | C  | -13.0221 | 6.7408  | -0.3799 |
| C | -11.0308 | 7.2581  | 1.1004 | H  | -13.6256 | 7.6211  | -0.1203 |
| H | -10.9105 | 8.1998  | 0.5680 | H  | -12.4869 | 6.9848  | -1.3066 |
| C | -9.2803  | 6.3532  | 5.0139 | H  | -13.7116 | 5.9181  | -0.5981 |
| H | -9.9517  | 6.0243  | 5.8253 | C  | -7.2567  | 10.8861 | 0.6743  |
| H | -9.6383  | 7.3273  | 4.6794 | H  | -7.4263  | 11.8594 | 1.1487  |
| C | -7.8556  | 6.4872  | 5.5804 | H  | -6.3632  | 10.9692 | 0.0439  |
| H | -7.8238  | 7.3390  | 6.2727 | H  | -8.1064  | 10.6976 | 0.0030  |
| H | -7.5849  | 5.6049  | 6.1645 | Rh | -7.2178  | 1.5341  | 4.7063  |
| C | -5.9767  | 5.5174  | 4.3033 | Rh | -6.7559  | -0.2949 | 6.2201  |
| C | -6.3021  | 4.3187  | 3.7769 | O  | -9.2104  | 1.3673  | 5.2320  |
| H | -5.4840  | 3.6229  | 3.6491 | O  | -8.7846  | -0.3716 | 6.6237  |
| C | -8.8698  | 4.1164  | 4.0981 | O  | -4.7475  | -0.1020 | 5.7455  |
| H | -9.5697  | 3.3562  | 3.7614 | O  | -5.1915  | 1.5490  | 4.2607  |
| H | -8.6905  | 3.9541  | 5.1585 | O  | -7.5087  | 0.1237  | 3.2214  |
| C | -4.5751  | 5.6928  | 4.7940 | O  | -7.0287  | -1.5896 | 4.6290  |
| C | -2.6229  | 7.0904  | 5.2030 | O  | -6.8948  | 2.8282  | 6.2863  |
| H | -2.1380  | 8.0607  | 5.1332 | O  | -6.4899  | 1.1205  | 7.7186  |
| C | -3.9280  | 6.9407  | 4.7337 | C  | -9.5634  | 0.4563  | 6.0520  |
| H | -4.4399  | 7.7952  | 4.3053 | C  | -6.5903  | 2.3542  | 7.4328  |
| C | -6.9264  | 7.6615  | 3.5967 | C  | -4.4000  | 0.7634  | 4.8817  |
| C | -7.5259  | 8.8911  | 3.9359 | C  | -7.3498  | -1.1142 | 3.4939  |
| H | -7.9244  | 9.0483  | 4.9323 | C  | -6.3294  | 3.3634  | 8.5214  |
| C | -7.6202  | 9.9206  | 2.9985 | C  | -2.9326  | 0.8606  | 4.5513  |
| H | -8.1000  | 10.8522 | 3.2920 | C  | -7.5888  | -2.0841 | 2.3654  |
| C | -7.1117  | 9.7872  | 1.7005 | C  | -11.0380 | 0.3323  | 6.3390  |
| C | -6.4906  | 8.5702  | 1.3812 | H  | -5.5689  | 4.0731  | 8.1792  |
| C | -6.3991  | 7.5258  | 2.2967 | H  | -7.2474  | 3.9283  | 8.7181  |
| H | -5.9540  | 6.5858  | 1.9954 | H  | -5.9982  | 2.8731  | 9.4385  |
| C | -3.8855  | 4.6138  | 5.3828 | H  | -11.5354 | 1.2972  | 6.2162  |
| H | -4.3879  | 3.6595  | 5.4995 | H  | -11.4731 | -0.3750 | 5.6220  |
| C | -2.5803  | 4.7674  | 5.8535 | H  | -11.2002 | -0.0565 | 7.3471  |
| H | -2.0729  | 3.9207  | 6.3093 | H  | -7.0571  | -1.7490 | 1.4697  |
| C | -1.9397  | 6.0051  | 5.7606 | H  | -8.6599  | -2.0957 | 2.1316  |
| H | -6.0846  | 8.4252  | 0.3819 | H  | -7.2681  | -3.0905 | 2.6406  |
| N | -6.8569  | 6.6145  | 4.5248 | H  | -2.3446  | 0.8543  | 5.4737  |
| H | -0.9249  | 6.1274  | 6.1296 | H  | -2.7221  | 1.7637  | 3.9757  |
| C | -6.3696  | 2.4143  | 1.2554 | H  | -2.6419  | -0.0185 | 3.9640  |
| H | -5.4224  | 2.8798  | 1.5292 |    |          |         |         |
| H | -6.5075  | 1.4476  | 1.7387 |    |          |         |         |
| H | -6.4315  | 2.3158  | 0.1675 |    |          |         |         |

4

Energy (POTENTIAL) = -1721.12711114 Eh



| Atom | X        | Y       | Z       | Atom | X        | Y       | Z       |
|------|----------|---------|---------|------|----------|---------|---------|
| S    | -6.5330  | 1.5136  | -0.5323 | H    | -5.1522  | 4.6439  | 1.4935  |
| O    | -7.4602  | 1.0268  | -1.5648 | C    | -7.0265  | 2.3524  | 4.7940  |
| O    | -5.7975  | 0.5481  | 0.2948  | H    | -7.3792  | 1.4688  | 4.2699  |
| N    | -9.7164  | 3.2414  | 0.9636  | C    | -6.7269  | 2.2752  | 6.1544  |
| N    | -7.4071  | 2.5400  | 0.4941  | H    | -6.8185  | 1.3226  | 6.6701  |
| C    | -11.0165 | -0.3088 | 2.9335  | C    | -6.3409  | 3.4194  | 6.8588  |
| C    | -11.2507 | 0.9581  | 3.4828  | H    | -3.9040  | 6.0328  | -0.0861 |
| H    | -11.7690 | 1.0408  | 4.4362  | N    | -7.7228  | 4.9169  | 2.1867  |
| C    | -10.8260 | 2.1267  | 2.8515  | H    | -6.1196  | 3.3601  | 7.9212  |
| H    | -11.0162 | 3.0759  | 3.3386  | C    | -5.3410  | 2.6058  | -1.3136 |
| C    | -10.1499 | 2.0772  | 1.6155  | H    | -5.8792  | 3.3828  | -1.8607 |
| C    | -9.9174  | 0.8035  | 1.0539  | H    | -4.7141  | 3.0464  | -0.5363 |
| H    | -9.4069  | 0.7024  | 0.1034  | H    | -4.7389  | 2.0003  | -1.9973 |
| C    | -10.3446 | -0.3524 | 1.7051  | C    | -11.4328 | -1.5696 | 3.6537  |
| H    | -10.1463 | -1.3148 | 1.2374  | H    | -11.6071 | -2.3942 | 2.9530  |
| C    | -10.0784 | 4.5767  | 1.4371  | H    | -10.6591 | -1.9031 | 4.3597  |
| H    | -11.1034 | 4.5595  | 1.8181  | H    | -12.3517 | -1.4173 | 4.2320  |
| H    | -10.0851 | 5.2363  | 0.5647  | C    | -4.7868  | 8.1701  | -1.5722 |
| C    | -9.1292  | 5.1485  | 2.5108  | H    | -4.8794  | 7.7669  | -2.5908 |
| H    | -9.3241  | 6.2175  | 2.6499  | H    | -5.1546  | 9.2024  | -1.6007 |
| H    | -9.3139  | 4.6628  | 3.4721  | H    | -3.7171  | 8.1998  | -1.3345 |
| C    | -7.1975  | 3.6754  | 2.6518  |      |          |         |         |
| C    | -6.9893  | 2.6246  | 1.8271  |      |          |         |         |
| H    | -6.4797  | 1.7430  | 2.1963  |      |          |         |         |
| C    | -8.6772  | 3.1644  | -0.0238 |      |          |         |         |
| H    | -8.4636  | 4.1736  | -0.3748 |      |          |         |         |
| H    | -8.9675  | 2.5516  | -0.8781 |      |          |         |         |
| C    | -6.9176  | 3.5739  | 4.1021  |      |          |         |         |
| C    | -6.2593  | 4.6445  | 6.1889  |      |          |         |         |
| H    | -5.9681  | 5.5419  | 6.7290  |      |          |         |         |
| C    | -6.5469  | 4.7222  | 4.8267  |      |          |         |         |
| H    | -6.4763  | 5.6738  | 4.3082  |      |          |         |         |
| C    | -7.0219  | 5.7073  | 1.2689  |      |          |         |         |
| C    | -7.6272  | 6.7968  | 0.6072  |      |          |         |         |
| H    | -8.6676  | 7.0436  | 0.7838  |      |          |         |         |
| C    | -6.8988  | 7.5866  | -0.2842 |      |          |         |         |
| H    | -7.4037  | 8.4187  | -0.7712 |      |          |         |         |
| C    | -5.5520  | 7.3368  | -0.5713 |      |          |         |         |
| C    | -4.9535  | 6.2573  | 0.0953  |      |          |         |         |
| C    | -5.6592  | 5.4605  | 0.9923  |      |          |         |         |

**C-D-ts-OAc-Me-Me**

**Energy (POTENTIAL) = -2854.29278710 Eh**

| Atom | X        | Y      | Z      |
|------|----------|--------|--------|
| S    | -8.3054  | 4.6399 | 2.0177 |
| O    | -8.6895  | 6.0611 | 2.1123 |
| O    | -9.3872  | 3.6737 | 1.7806 |
| N    | -9.1898  | 6.6188 | 5.1385 |
| N    | -7.4508  | 4.0818 | 3.3473 |
| C    | -12.8029 | 4.5444 | 4.2718 |
| C    | -12.7544 | 5.9424 | 4.3018 |
| H    | -13.6580 | 6.5168 | 4.1136 |
| C    | -11.5643 | 6.6217 | 4.5713 |
| H    | -11.5643 | 7.7058 | 4.6031 |
| C    | -10.3934 | 5.8986 | 4.8161 |
| C    | -10.4182 | 4.4998 | 4.7838 |
| H    | -9.5132  | 3.9182 | 4.9067 |
| C    | -11.6131 | 3.8430 | 4.5192 |
| H    | -11.5992 | 2.7603 | 4.4637 |
| C    | -8.9466  | 7.9384 | 4.4852 |

|   |          |        |         |    |          |         |         |
|---|----------|--------|---------|----|----------|---------|---------|
| H | -9.4456  | 8.7243 | 5.0635  | C  | -4.1406  | 7.9971  | -1.4203 |
| H | -9.3979  | 7.8697 | 3.4978  | H  | -4.1284  | 9.0542  | -1.7138 |
| C | -7.4493  | 8.2511 | 4.3511  | H  | -3.1066  | 7.6347  | -1.4262 |
| H | -7.3702  | 9.1742 | 3.7739  | H  | -4.6829  | 7.4541  | -2.2070 |
| H | -7.0201  | 8.4808 | 5.3355  | Rh | -7.3971  | 1.8821  | 3.8212  |
| C | -6.3076  | 6.0753 | 4.5070  | Rh | -7.0863  | -0.4227 | 4.5561  |
| C | -6.6524  | 4.7592 | 4.1938  | O  | -9.4345  | 1.4578  | 3.7400  |
| H | -6.1464  | 4.0525 | 4.8388  | O  | -9.1219  | -0.6989 | 4.3777  |
| C | -8.2737  | 6.1328 | 5.9399  | O  | -5.0477  | -0.0195 | 4.7011  |
| H | -8.4057  | 5.1445 | 6.3628  | O  | -5.3432  | 2.1140  | 3.9943  |
| H | -7.5725  | 6.7980 | 6.4194  | O  | -7.1243  | 1.2174  | 1.8809  |
| C | -5.2768  | 6.2802 | 5.5655  | O  | -6.8461  | -0.9327 | 2.5597  |
| C | -3.4635  | 7.6189 | 6.5086  | O  | -7.6230  | 2.4176  | 5.8184  |
| H | -2.8173  | 8.4905 | 6.4407  | O  | -7.3463  | 0.2725  | 6.5040  |
| C | -4.4303  | 7.4049 | 5.5240  | C  | -9.8441  | 0.2869  | 4.0174  |
| H | -4.5171  | 8.1053 | 4.6997  | C  | -7.5354  | 1.5102  | 6.7130  |
| C | -6.0470  | 7.4089 | 2.4634  | C  | -4.6266  | 1.1404  | 4.4031  |
| C | -6.6153  | 8.2536 | 1.4891  | C  | -6.9165  | -0.0236 | 1.6727  |
| H | -7.5706  | 8.7314 | 1.6767  | C  | -7.6249  | 1.9627  | 8.1506  |
| C | -5.9885  | 8.4469 | 0.2611  | C  | -3.1467  | 1.4134  | 4.5245  |
| H | -6.4596  | 9.1012 | -0.4702 | C  | -6.7636  | -0.4394 | 0.2295  |
| C | -4.7854  | 7.8035 | -0.0681 | C  | -11.3340 | 0.0442  | 3.9400  |
| C | -4.2307  | 6.9574 | 0.8996  | H  | -6.6076  | 2.1289  | 8.5269  |
| C | -4.8381  | 6.7622 | 2.1414  | H  | -8.1821  | 2.8989  | 8.2302  |
| H | -4.3680  | 6.1073 | 2.8673  | H  | -8.0918  | 1.1896  | 8.7657  |
| C | -5.1428  | 5.4030 | 6.6652  | H  | -11.7827 | 0.2788  | 4.9131  |
| H | -5.8131  | 4.5531 | 6.7648  | H  | -11.7885 | 0.6898  | 3.1850  |
| C | -4.1702  | 5.6131 | 7.6409  | H  | -11.5378 | -1.0054 | 3.7142  |
| H | -4.0876  | 4.9147 | 8.4701  | H  | -6.0717  | 0.2375  | -0.2810 |
| C | -3.3202  | 6.7218 | 7.5694  | H  | -7.7376  | -0.3572 | -0.2674 |
| H | -3.2960  | 6.4419 | 0.6879  | H  | -6.4068  | -1.4684 | 0.1550  |
| N | -6.6594  | 7.2057 | 3.7100  | H  | -2.9904  | 2.3428  | 5.0814  |
| H | -2.5668  | 6.8875 | 8.3346  | H  | -2.7248  | 1.5515  | 3.5221  |
| C | -7.1175  | 4.4355 | 0.6812  | H  | -2.6355  | 0.5866  | 5.0214  |
| H | -6.2488  | 5.0695 | 0.8609  |    |          |         |         |
| H | -6.8394  | 3.3794 | 0.6594  |    |          |         |         |
| H | -7.6182  | 4.7261 | -0.2469 |    |          |         |         |
| C | -14.0789 | 3.7998 | 3.9634  |    |          |         |         |
| H | -14.9175 | 4.4849 | 3.8021  |    |          |         |         |
| H | -13.9667 | 3.1857 | 3.0607  |    |          |         |         |
| H | -14.3496 | 3.1191 | 4.7806  |    |          |         |         |

  

|                                               |         |        |        |
|-----------------------------------------------|---------|--------|--------|
| <b>D_-OAc-Me-Me</b>                           |         |        |        |
| <b>Energy (POTENTIAL) = -2854.31634308 Eh</b> |         |        |        |
| Atom                                          | X       | Y      | Z      |
| S                                             | -8.4893 | 4.9018 | 1.9348 |

|   |          |        |         |    |          |         |         |
|---|----------|--------|---------|----|----------|---------|---------|
| O | -8.7808  | 6.3369 | 1.9646  | H  | -5.9662  | 4.5999  | 6.7716  |
| O | -9.6121  | 3.9685 | 1.8345  | C  | -4.2510  | 5.5986  | 7.5728  |
| N | -9.2240  | 6.7998 | 4.9746  | H  | -4.0903  | 4.8354  | 8.3296  |
| N | -7.5367  | 4.3006 | 3.2850  | C  | -3.4066  | 6.7089  | 7.5015  |
| C | -12.6702 | 4.3097 | 4.7807  | H  | -3.2962  | 5.7639  | 1.3227  |
| C | -12.7073 | 5.6522 | 4.3856  | N  | -6.8423  | 7.3858  | 3.7466  |
| H | -13.6390 | 6.0735 | 4.0121  | H  | -2.5793  | 6.8135  | 8.1981  |
| C | -11.5838 | 6.4770 | 4.4601  | C  | -7.3086  | 4.5574  | 0.6300  |
| H | -11.6743 | 7.5147 | 4.1580  | H  | -6.4133  | 5.1592  | 0.7882  |
| C | -10.3503 | 5.9780 | 4.9288  | H  | -7.0853  | 3.4890  | 0.6481  |
| C | -10.3109 | 4.6267 | 5.3362  | H  | -7.8022  | 4.8404  | -0.3045 |
| H | -9.3847  | 4.1650 | 5.6571  | C  | -13.8758 | 3.4088  | 4.6502  |
| C | -11.4466 | 3.8264 | 5.2649  | H  | -14.8124 | 3.9709  | 4.7457  |
| H | -11.3624 | 2.7847 | 5.5665  | H  | -13.8996 | 2.9069  | 3.6724  |
| C | -9.1770  | 8.0862 | 4.2839  | H  | -13.8747 | 2.6230  | 5.4149  |
| H | -9.7038  | 8.8727 | 4.8485  | C  | -3.6455  | 7.1130  | -1.0560 |
| H | -9.6557  | 7.9785 | 3.3104  | H  | -3.2955  | 8.1020  | -1.3788 |
| C | -7.7075  | 8.5114 | 4.0931  | H  | -2.7660  | 6.4734  | -0.9241 |
| H | -7.6550  | 9.2727 | 3.3175  | H  | -4.2356  | 6.6986  | -1.8847 |
| H | -7.3295  | 8.9824 | 5.0110  | Rh | -7.4122  | 2.0208  | 3.6212  |
| C | -6.7723  | 6.3360 | 4.7452  | Rh | -7.0498  | -0.2981 | 4.2381  |
| C | -6.8765  | 4.9191 | 4.1990  | O  | -9.4234  | 1.5622  | 3.4910  |
| H | -6.3243  | 4.2202 | 4.8201  | O  | -9.0891  | -0.5956 | 4.1060  |
| C | -8.0369  | 6.4828 | 5.7029  | O  | -5.0182  | 0.1493  | 4.3644  |
| H | -8.1498  | 5.5733 | 6.2890  | O  | -5.3740  | 2.3232  | 3.8302  |
| H | -7.7875  | 7.2786 | 6.4158  | O  | -7.1277  | 1.4709  | 1.6481  |
| C | -5.5436  | 6.4314 | 5.6842  | O  | -6.8357  | -0.7060 | 2.2141  |
| C | -3.6395  | 7.6850 | 6.5305  | O  | -7.6477  | 2.4284  | 5.6424  |
| H | -2.9938  | 8.5568 | 6.4665  | O  | -7.2865  | 0.2667  | 6.2230  |
| C | -4.7014  | 7.5487 | 5.6331  | C  | -9.8262  | 0.3928  | 3.7788  |
| H | -4.8693  | 8.3111 | 4.8803  | C  | -7.5227  | 1.4848  | 6.4946  |
| C | -6.0457  | 7.3439 | 2.5965  | C  | -4.6282  | 1.3403  | 4.1596  |
| C | -6.3581  | 8.1128 | 1.4531  | C  | -6.9147  | 0.2424  | 1.3723  |
| H | -7.2431  | 8.7376 | 1.4438  | C  | -7.6299  | 1.8644  | 7.9504  |
| C | -5.5791  | 8.0406 | 0.3040  | C  | -3.1552  | 1.6383  | 4.2913  |
| H | -5.8641  | 8.6424 | -0.5570 | C  | -6.7661  | -0.0976 | -0.0895 |
| C | -4.4593  | 7.1974 | 0.2133  | C  | -11.3146 | 0.1444  | 3.7354  |
| C | -4.1548  | 6.4319 | 1.3419  | H  | -6.6185  | 2.0222  | 8.3453  |
| C | -4.9200  | 6.4989 | 2.5099  | H  | -8.2006  | 2.7881  | 8.0688  |
| H | -4.6139  | 5.8925 | 3.3537  | H  | -8.0933  | 1.0555  | 8.5208  |
| C | -5.3140  | 5.4641 | 6.6775  | H  | -11.6592 | -0.1574 | 4.7308  |

|   |          |         |         |
|---|----------|---------|---------|
| H | -11.8489 | 1.0413  | 3.4181  |
| H | -11.5276 | -0.6806 | 3.0474  |
| H | -6.0736  | 0.6039  | -0.5648 |
| H | -7.7411  | 0.0121  | -0.5791 |
| H | -6.4112  | -1.1219 | -0.2177 |
| H | -3.0156  | 2.5724  | 4.8439  |
| H | -2.7301  | 1.7750  | 3.2898  |
| H | -2.6348  | 0.8201  | 4.7928  |

**Rh-OAc**

**Energy (POTENTIAL) = -1133.17573809 Eh**

| Atom | X        | Y       | Z        |
|------|----------|---------|----------|
| Rh   | -11.4398 | 0.6512  | -9.3564  |
| Rh   | -9.9388  | 1.3889  | -11.0788 |
| O    | -9.8450  | -0.3342 | -8.4832  |
| O    | -8.4294  | 0.3543  | -10.1142 |
| O    | -11.5330 | 2.3782  | -11.9501 |
| O    | -12.9486 | 1.6857  | -10.3208 |
| O    | -11.8382 | -1.0107 | -10.5203 |
| O    | -10.4189 | -0.3159 | -12.1465 |
| O    | -10.9611 | 2.3575  | -8.2892  |
| O    | -9.5390  | 3.0503  | -9.9137  |
| C    | -8.6991  | -0.2714 | -9.0373  |
| C    | -10.1170 | 3.1743  | -8.7845  |
| C    | -12.6754 | 2.3267  | -11.3880 |
| C    | -11.2617 | -1.1335 | -11.6503 |
| C    | -9.7403  | 4.3740  | -7.9538  |
| C    | -13.7944 | 3.1187  | -12.0146 |
| C    | -11.6390 | -2.3327 | -12.4814 |
| C    | -7.5585  | -0.9661 | -8.3389  |
| H    | -10.5412 | 4.6278  | -7.2562  |
| H    | -8.8392  | 4.1297  | -7.3776  |
| H    | -9.5111  | 5.2254  | -8.5995  |
| H    | -6.7843  | -1.2479 | -9.0561  |
| H    | -7.1216  | -0.2707 | -7.6114  |
| H    | -7.9195  | -1.8451 | -7.7998  |
| H    | -11.8697 | -3.1838 | -11.8361 |
| H    | -10.8376 | -2.5874 | -13.1782 |
| H    | -12.5391 | -2.0871 | -13.0587 |
| H    | -13.5953 | 3.2992  | -13.0731 |
| H    | -13.8653 | 4.0855  | -11.5007 |

|   |          |        |          |
|---|----------|--------|----------|
| H | -14.7460 | 2.5964 | -11.8877 |
|---|----------|--------|----------|

**2\_Me-Me**

**Energy (POTENTIAL) = -769.399133853 Eh**

| Atom | X        | Y      | Z       |
|------|----------|--------|---------|
| N    | -10.1346 | 3.9657 | 2.0620  |
| C    | -13.2012 | 2.8871 | -0.6696 |
| C    | -13.4306 | 3.8103 | 0.3587  |
| H    | -14.4168 | 4.2587 | 0.4626  |
| C    | -12.4291 | 4.1846 | 1.2544  |
| H    | -12.6581 | 4.9120 | 2.0259  |
| C    | -11.1343 | 3.6328 | 1.1570  |
| C    | -10.8941 | 2.7056 | 0.1182  |
| H    | -9.9138  | 2.2537 | 0.0051  |
| C    | -11.9096 | 2.3493 | -0.7666 |
| H    | -11.6876 | 1.6333 | -1.5558 |
| C    | -10.2696 | 5.0853 | 2.9884  |
| H    | -11.1026 | 4.9286 | 3.6799  |
| H    | -10.4324 | 6.0373 | 2.4580  |
| C    | -8.9260  | 5.0769 | 3.7106  |
| H    | -8.6452  | 6.0762 | 4.0562  |
| H    | -8.9428  | 4.4009 | 4.5806  |
| C    | -8.7316  | 3.7628 | 1.7206  |
| H    | -8.5129  | 4.0687 | 0.6842  |
| H    | -8.4534  | 2.7004 | 1.8177  |
| C    | -6.6616  | 4.4086 | 2.9098  |
| C    | -6.0409  | 4.9054 | 4.0748  |
| H    | -6.6246  | 5.4255 | 4.8268  |
| C    | -4.6705  | 4.7389 | 4.2767  |
| H    | -4.2254  | 5.1372 | 5.1864  |
| C    | -3.8587  | 4.0731 | 3.3503  |
| C    | -4.4830  | 3.5770 | 2.1960  |
| C    | -5.8483  | 3.7341 | 1.9707  |
| H    | -6.2796  | 3.3452 | 1.0538  |
| H    | -3.8867  | 3.0546 | 1.4499  |
| N    | -8.0159  | 4.6023 | 2.6732  |
| C    | -14.2995 | 2.4677 | -1.6188 |
| H    | -13.9178 | 2.3204 | -2.6363 |
| H    | -14.7612 | 1.5195 | -1.3091 |
| H    | -15.0980 | 3.2171 | -1.6642 |
| C    | -2.3793  | 3.8755 | 3.5840  |

|   |         |        |        |
|---|---------|--------|--------|
| H | -2.0213 | 4.4855 | 4.4208 |
| H | -2.1432 | 2.8278 | 3.8165 |
| H | -1.7910 | 4.1444 | 2.6975 |

**t-A-OAc-Me-Me**

**Energy (POTENTIAL) = -2854.28472268 Eh**

| Atom | X        | Y      | Z       |
|------|----------|--------|---------|
| S    | -3.0664  | 2.3140 | 0.7262  |
| O    | -2.1885  | 3.3908 | 0.2369  |
| O    | -4.0115  | 1.6888 | -0.2224 |
| N    | -10.4782 | 4.4696 | 2.2909  |
| N    | -3.8591  | 2.9313 | 2.1152  |
| C    | -13.2396 | 1.3439 | 3.0521  |
| C    | -13.6110 | 2.6882 | 3.1866  |
| H    | -14.6208 | 2.9314 | 3.5115  |
| C    | -12.7255 | 3.7340 | 2.9160  |
| H    | -13.0613 | 4.7582 | 3.0408  |
| C    | -11.4082 | 3.4616 | 2.4983  |
| C    | -11.0337 | 2.1093 | 2.3451  |
| H    | -10.0201 | 1.8697 | 2.0563  |
| C    | -11.9287 | 1.0829 | 2.6235  |
| H    | -11.5876 | 0.0549 | 2.5219  |
| C    | -10.8480 | 5.8790 | 2.2328  |
| H    | -11.2719 | 6.2155 | 3.1838  |
| H    | -11.5820 | 6.0774 | 1.4355  |
| C    | -9.5121  | 6.5540 | 1.9320  |
| H    | -9.6460  | 7.4925 | 1.3868  |
| H    | -8.9510  | 6.7641 | 2.8568  |
| C    | -5.9001  | 3.1181 | 3.3052  |
| C    | -5.1481  | 2.8209 | 2.1062  |
| H    | -5.6958  | 2.3686 | 1.2752  |
| C    | -9.2974  | 4.2196 | 1.4735  |
| H    | -9.5404  | 3.6303 | 0.5738  |
| H    | -8.5373  | 3.6592 | 2.0407  |
| C    | -5.9415  | 4.4102 | 3.8864  |
| C    | -6.5610  | 5.8828 | 5.7298  |
| H    | -7.0103  | 6.0349 | 6.7065  |
| C    | -6.5378  | 4.6174 | 5.1667  |
| H    | -6.9583  | 3.7737 | 5.6944  |
| C    | -7.5778  | 5.7440 | 0.5735  |
| C    | -6.8630  | 4.6663 | 0.0045  |

|    |          |         |         |
|----|----------|---------|---------|
| H  | -7.2957  | 3.6715  | -0.0127 |
| C  | -5.5952  | 4.8597  | -0.5416 |
| H  | -5.0729  | 4.0018  | -0.9585 |
| C  | -4.9769  | 6.1187  | -0.5508 |
| C  | -5.6951  | 7.1845  | 0.0092  |
| C  | -6.9645  | 7.0141  | 0.5606  |
| H  | -7.4679  | 7.8683  | 1.0003  |
| C  | -5.3830  | 5.5328  | 3.2028  |
| H  | -4.9469  | 5.4000  | 2.2201  |
| C  | -5.4122  | 6.7917  | 3.7795  |
| H  | -4.9920  | 7.6401  | 3.2491  |
| C  | -6.0002  | 6.9681  | 5.0397  |
| H  | -5.2480  | 8.1766  | 0.0265  |
| N  | -8.8425  | 5.5538  | 1.1080  |
| H  | -6.0234  | 7.9582  | 5.4869  |
| C  | -2.0700  | 1.0328  | 1.4855  |
| H  | -1.4130  | 1.4949  | 2.2250  |
| H  | -2.7434  | 0.3161  | 1.9581  |
| H  | -1.4866  | 0.5577  | 0.6920  |
| C  | -14.1988 | 0.2150  | 3.3482  |
| H  | -14.4301 | -0.3668 | 2.4456  |
| H  | -13.7786 | -0.4882 | 4.0792  |
| H  | -15.1463 | 0.5892  | 3.7516  |
| C  | -3.6044  | 6.3097  | -1.1519 |
| H  | -3.6458  | 6.3466  | -2.2498 |
| H  | -3.1476  | 7.2461  | -0.8118 |
| H  | -2.9375  | 5.4840  | -0.8798 |
| Rh | -6.8017  | 1.4029  | 3.9170  |
| Rh | -7.9878  | -0.6415 | 4.6250  |
| O  | -8.4900  | 2.4423  | 4.5117  |
| O  | -9.5610  | 0.5718  | 5.2222  |
| O  | -6.3124  | -1.7043 | 4.0134  |
| O  | -5.1981  | 0.1753  | 3.3952  |
| O  | -7.5898  | 1.0754  | 2.0206  |
| O  | -8.7172  | -0.7818 | 2.6789  |
| O  | -6.0832  | 1.5402  | 5.8516  |
| O  | -7.1455  | -0.3598 | 6.5023  |
| C  | -9.4589  | 1.8267  | 5.0785  |
| C  | -6.4029  | 0.6456  | 6.7104  |
| C  | -5.3117  | -1.0922 | 3.5360  |
| C  | -8.3293  | 0.0504  | 1.8074  |

|   |          |         |         |
|---|----------|---------|---------|
| C | -5.8008  | 0.7970  | 8.0854  |
| C | -4.1344  | -1.9174 | 3.0753  |
| C | -8.7476  | -0.1742 | 0.3755  |
| C | -10.5566 | 2.6834  | 5.6567  |
| H | -5.5917  | 1.8470  | 8.3029  |
| H | -6.4687  | 0.3749  | 8.8401  |
| H | -4.8545  | 0.2425  | 8.1136  |
| H | -10.4506 | 3.7200  | 5.3351  |
| H | -11.5294 | 2.2931  | 5.3476  |
| H | -10.4982 | 2.6320  | 6.7507  |
| H | -8.8801  | 0.7792  | -0.1415 |
| H | -9.6658  | -0.7634 | 0.3302  |
| H | -7.9493  | -0.7290 | -0.1332 |
| H | -3.2172  | -1.5483 | 3.5450  |
| H | -4.0239  | -1.8109 | 1.9903  |
| H | -4.2808  | -2.9703 | 3.3229  |

**t-A-B-ts-OAc-Me-Me**

**Energy (POTENTIAL) = -2854.27387087 Eh**

| Atom | X        | Y      | Z       |
|------|----------|--------|---------|
| S    | -3.8305  | 2.0775 | 0.3436  |
| O    | -2.8518  | 2.9748 | -0.2933 |
| O    | -5.0087  | 1.6533 | -0.4432 |
| N    | -10.1512 | 4.0908 | 1.8424  |
| N    | -4.2671  | 2.8242 | 1.8210  |
| C    | -13.7862 | 1.8972 | 1.6852  |
| C    | -13.7707 | 3.2742 | 1.9470  |
| H    | -14.7112 | 3.7969 | 2.1099  |
| C    | -12.5831 | 4.0021 | 1.9974  |
| H    | -12.6219 | 5.0716 | 2.1797  |
| C    | -11.3396 | 3.3680 | 1.7929  |
| C    | -11.3478 | 1.9819 | 1.5176  |
| H    | -10.4197 | 1.4465 | 1.3479  |
| C    | -12.5493 | 1.2758 | 1.4653  |
| H    | -12.5183 | 0.2089 | 1.2521  |
| C    | -10.0103 | 5.2900 | 2.6816  |
| H    | -10.7645 | 5.3239 | 3.4745  |
| H    | -10.0898 | 6.2059 | 2.0837  |
| C    | -8.6101  | 5.1137 | 3.2757  |
| H    | -8.1223  | 6.0390 | 3.5620  |
| H    | -8.6510  | 4.4534 | 4.1398  |

|    |          |        |         |
|----|----------|--------|---------|
| C  | -6.1122  | 3.3527 | 3.2753  |
| C  | -5.5436  | 2.8999 | 2.0242  |
| H  | -6.2450  | 2.4825 | 1.3031  |
| C  | -8.8793  | 3.3621 | 1.8267  |
| H  | -8.6728  | 2.9292 | 0.8514  |
| H  | -8.8604  | 2.5705 | 2.5713  |
| C  | -5.6499  | 4.5285 | 3.9804  |
| C  | -5.7514  | 5.9741 | 5.9432  |
| H  | -6.1557  | 6.1946 | 6.9271  |
| C  | -6.1612  | 4.8317 | 5.2669  |
| H  | -6.8811  | 4.1611 | 5.7162  |
| C  | -7.2930  | 5.1568 | 1.1572  |
| C  | -7.0244  | 4.5873 | -0.1039 |
| H  | -7.3103  | 3.5695 | -0.3347 |
| C  | -6.3591  | 5.3126 | -1.0856 |
| H  | -6.1607  | 4.8349 | -2.0419 |
| C  | -5.9328  | 6.6313 | -0.8675 |
| C  | -6.2022  | 7.1917 | 0.3838  |
| C  | -6.8610  | 6.4738 | 1.3841  |
| H  | -7.0201  | 6.9595 | 2.3370  |
| C  | -4.7218  | 5.4283 | 3.3967  |
| H  | -4.3279  | 5.2257 | 2.4092  |
| C  | -4.2985  | 6.5587 | 4.0907  |
| H  | -3.5778  | 7.2315 | 3.6348  |
| C  | -4.8137  | 6.8364 | 5.3602  |
| H  | -5.8847  | 8.2095 | 0.5965  |
| N  | -7.8700  | 4.3691 | 2.2187  |
| H  | -4.4880  | 7.7244 | 5.8955  |
| C  | -2.9973  | 0.6100 | 0.9464  |
| H  | -2.1892  | 0.9135 | 1.6142  |
| H  | -3.7313  | 0.0020 | 1.4757  |
| H  | -2.6009  | 0.0779 | 0.0770  |
| C  | -15.0750 | 1.1094 | 1.6625  |
| H  | -15.0653 | 0.3451 | 0.8762  |
| H  | -15.2455 | 0.5869 | 2.6144  |
| H  | -15.9398 | 1.7599 | 1.4897  |
| C  | -5.2174  | 7.4013 | -1.9497 |
| H  | -5.8743  | 7.5757 | -2.8119 |
| H  | -4.8720  | 8.3755 | -1.5886 |
| H  | -4.3457  | 6.8470 | -2.3189 |
| Rh | -6.7478  | 1.5248 | 4.2090  |

|    |          |         |        |   |          |        |         |
|----|----------|---------|--------|---|----------|--------|---------|
| Rh | -7.4513  | -0.5991 | 5.2618 | C | -12.3575 | 4.1079 | 2.3771  |
| O  | -8.6095  | 2.2664  | 4.7829 | H | -12.3139 | 5.0077 | 2.9822  |
| O  | -9.3113  | 0.2695  | 5.5989 | C | -11.1720 | 3.5353 | 1.8742  |
| O  | -5.5463  | -1.3136 | 4.8682 | C | -11.2835 | 2.3827 | 1.0688  |
| O  | -4.9305  | 0.5950  | 3.7997 | H | -10.4000 | 1.9064 | 0.6567  |
| O  | -7.5180  | 0.7620  | 2.4293 | C | -12.5352 | 1.8350 | 0.7888  |
| O  | -8.0972  | -1.2146 | 3.3778 | H | -12.5872 | 0.9458 | 0.1640  |
| O  | -5.9723  | 2.0413  | 6.0644 | C | -9.7266  | 4.9404 | 3.3467  |
| O  | -6.7498  | 0.1544  | 7.0611 | H | -10.3706 | 4.6355 | 4.1792  |
| C  | -9.4896  | 1.4831  | 5.2849 | H | -9.9251  | 5.9939 | 3.1224  |
| C  | -6.1468  | 1.2707  | 7.0673 | C | -8.2714  | 4.6779 | 3.7085  |
| C  | -4.7119  | -0.5776 | 4.2586 | H | -7.7361  | 5.5157 | 4.1420  |
| C  | -7.9961  | -0.4222 | 2.3944 | H | -8.1870  | 3.8253 | 4.3740  |
| C  | -5.5388  | 1.7335  | 8.3698 | C | -6.3073  | 3.4499 | 2.7032  |
| C  | -3.3328  | -1.1527 | 4.0347 | C | -5.9571  | 2.5520 | 1.6496  |
| C  | -8.4924  | -0.9145 | 1.0559 | H | -6.7637  | 2.1189 | 1.0586  |
| C  | -10.8692 | 2.0657  | 5.4672 | C | -8.7278  | 3.3858 | 1.8110  |
| H  | -5.6386  | 2.8176  | 8.4714 | H | -8.6054  | 3.3067 | 0.7326  |
| H  | -6.0053  | 1.2257  | 9.2167 | H | -8.6695  | 2.3987 | 2.2707  |
| H  | -4.4686  | 1.4928  | 8.3598 | C | -5.2525  | 4.3759 | 3.2573  |
| H  | -10.8091 | 3.1264  | 5.7238 | C | -4.2438  | 5.6199 | 5.0957  |
| H  | -11.4062 | 1.9768  | 4.5142 | H | -4.2218  | 5.8626 | 6.1554  |
| H  | -11.4220 | 1.5192  | 6.2343 | C | -5.1982  | 4.7177 | 4.6175  |
| H  | -8.2769  | -0.1928 | 0.2660 | H | -5.8882  | 4.2563 | 5.3104  |
| H  | -9.5729  | -1.0874 | 1.1136 | C | -7.3318  | 5.4006 | 1.4715  |
| H  | -8.0170  | -1.8727 | 0.8221 | C | -6.9138  | 5.1119 | 0.1675  |
| H  | -2.6142  | -0.3658 | 3.8002 | H | -6.8266  | 4.0923 | -0.1879 |
| H  | -3.3709  | -1.8619 | 3.1991 | C | -6.5706  | 6.1454 | -0.6970 |
| H  | -3.0152  | -1.7022 | 4.9252 | H | -6.2441  | 5.9004 | -1.7043 |

**t-B-OAc-Me-Me**

**Energy (POTENTIAL) = -2854.29263340 Eh**

| Atom | X        | Y      | Z       |
|------|----------|--------|---------|
| S    | -4.5215  | 0.9585 | 0.2847  |
| O    | -3.3990  | 1.3661 | -0.5836 |
| O    | -5.7836  | 0.5625 | -0.3872 |
| N    | -9.9326  | 4.1059 | 2.1608  |
| N    | -4.7251  | 2.1665 | 1.4231  |
| C    | -13.7184 | 2.3913 | 1.2936  |
| C    | -13.5967 | 3.5387 | 2.0890  |
| H    | -14.4928 | 4.0057 | 2.4924  |
| C    | -12.3575 | 4.1079 | 2.3771  |
| H    | -12.3139 | 5.0077 | 2.9822  |
| C    | -11.1720 | 3.5353 | 1.8742  |
| C    | -11.2835 | 2.3827 | 1.0688  |
| H    | -10.4000 | 1.9064 | 0.6567  |
| C    | -12.5352 | 1.8350 | 0.7888  |
| H    | -12.5872 | 0.9458 | 0.1640  |
| C    | -9.7266  | 4.9404 | 3.3467  |
| H    | -10.3706 | 4.6355 | 4.1792  |
| H    | -9.9251  | 5.9939 | 3.1224  |
| C    | -8.2714  | 4.6779 | 3.7085  |
| H    | -7.7361  | 5.5157 | 4.1420  |
| H    | -8.1870  | 3.8253 | 4.3740  |
| C    | -6.3073  | 3.4499 | 2.7032  |
| C    | -5.9571  | 2.5520 | 1.6496  |
| H    | -6.7637  | 2.1189 | 1.0586  |
| C    | -8.7278  | 3.3858 | 1.8110  |
| H    | -8.6054  | 3.3067 | 0.7326  |
| H    | -8.6695  | 2.3987 | 2.2707  |
| C    | -5.2525  | 4.3759 | 3.2573  |
| C    | -4.2438  | 5.6199 | 5.0957  |
| H    | -4.2218  | 5.8626 | 6.1554  |
| C    | -5.1982  | 4.7177 | 4.6175  |
| H    | -5.8882  | 4.2563 | 5.3104  |
| C    | -7.3318  | 5.4006 | 1.4715  |
| C    | -6.9138  | 5.1119 | 0.1675  |
| H    | -6.8266  | 4.0923 | -0.1879 |
| C    | -6.5706  | 6.1454 | -0.6970 |
| H    | -6.2441  | 5.9004 | -1.7043 |
| C    | -6.6241  | 7.4877 | -0.2902 |
| C    | -7.0471  | 7.7524 | 1.0142  |
| C    | -7.3968  | 6.7245 | 1.8957  |
| H    | -7.7060  | 6.9954 | 2.8957  |
| C    | -4.3139  | 4.9699 | 2.3905  |
| H    | -4.3346  | 4.7308 | 1.3343  |
| C    | -3.3589  | 5.8669 | 2.8669  |
| H    | -2.6481  | 6.3106 | 2.1744  |
| C    | -3.3200  | 6.1987 | 4.2242  |
| H    | -7.1025  | 8.7794 | 1.3647  |
| N    | -7.6176  | 4.2414 | 2.4022  |
| H    | -2.5758  | 6.8979 | 4.5967  |

|    |          |         |         |                                               |          |         |        |
|----|----------|---------|---------|-----------------------------------------------|----------|---------|--------|
| C  | -3.9645  | -0.4133 | 1.3023  | H                                             | -2.5606  | -0.3339 | 5.8873 |
| H  | -3.0395  | -0.1190 | 1.8003  | <b>t-B_-OAc-Me-Me</b>                         |          |         |        |
| H  | -4.7401  | -0.6384 | 2.0324  | <b>Energy (POTENTIAL) = -2854.28923420 Eh</b> |          |         |        |
| H  | -3.7902  | -1.2656 | 0.6396  | Atom                                          | X        | Y       | Z      |
| C  | -15.0631 | 1.7633  | 1.0125  | S                                             | -6.4544  | 2.7273  | 1.1136 |
| H  | -15.1090 | 1.3495  | -0.0018 | O                                             | -7.6852  | 2.3775  | 0.3585 |
| H  | -15.2749 | 0.9378  | 1.7065  | O                                             | -5.3370  | 1.7688  | 1.0972 |
| H  | -15.8750 | 2.4919  | 1.1170  | N                                             | -11.2641 | 5.5668  | 4.6310 |
| C  | -6.2172  | 8.5923  | -1.2325 | N                                             | -6.7494  | 3.1717  | 2.6811 |
| H  | -6.7432  | 8.5096  | -2.1911 | C                                             | -15.2138 | 4.0776  | 5.1021 |
| H  | -6.4281  | 9.5798  | -0.8103 | C                                             | -14.7249 | 5.1255  | 5.8919 |
| H  | -5.1426  | 8.5422  | -1.4508 | H                                             | -15.3710 | 5.5753  | 6.6426 |
| Rh | -6.8586  | 1.4428  | 4.1928  | C                                             | -13.4255 | 5.6132  | 5.7484 |
| Rh | -7.1808  | -0.5530 | 5.5757  | H                                             | -13.0935 | 6.4301  | 6.3806 |
| O  | -8.9378  | 1.6699  | 4.2629  | C                                             | -12.5570 | 5.0598  | 4.7894 |
| O  | -9.2223  | -0.1722 | 5.5538  | C                                             | -13.0359 | 3.9981  | 3.9950 |
| O  | -5.1260  | -0.8242 | 5.4840  | H                                             | -12.3972 | 3.5238  | 3.2582 |
| O  | -4.8363  | 1.0705  | 4.2686  | C                                             | -14.3378 | 3.5282  | 4.1550 |
| O  | -7.0905  | 0.1874  | 2.5550  | H                                             | -14.6747 | 2.7043  | 3.5292 |
| O  | -7.4012  | -1.6564 | 3.8357  | C                                             | -10.5970 | 6.3082  | 5.7024 |
| O  | -6.7754  | 2.5094  | 5.9805  | H                                             | -10.7402 | 5.8394  | 6.6848 |
| O  | -6.9519  | 0.6417  | 7.2534  | H                                             | -10.9772 | 7.3323  | 5.7538 |
| C  | -9.6551  | 0.8242  | 4.8976  | C                                             | -9.1197  | 6.2451  | 5.3078 |
| C  | -6.8117  | 1.8938  | 7.0980  | H                                             | -8.5547  | 7.1616  | 5.4494 |
| C  | -4.4106  | 0.0352  | 4.8760  | H                                             | -8.6076  | 5.4291  | 5.8125 |
| C  | -7.3238  | -1.0562 | 2.7186  | C                                             | -7.7981  | 5.1663  | 3.5074 |
| C  | -6.6380  | 2.7411  | 8.3343  | C                                             | -7.8479  | 4.0155  | 2.8054 |
| C  | -2.9207  | -0.2049 | 4.8615  | H                                             | -8.7854  | 3.6816  | 2.3622 |
| C  | -7.5358  | -1.8666 | 1.4643  | C                                             | -10.2875 | 4.8532  | 3.8541 |
| C  | -11.1463 | 1.0472  | 4.8398  | H                                             | -10.6222 | 4.6621  | 2.8370 |
| H  | -7.1786  | 3.6853  | 8.2243  | H                                             | -9.9187  | 3.9294  | 4.3164 |
| H  | -6.9810  | 2.2088  | 9.2238  | C                                             | -6.5742  | 5.8148  | 4.0388 |
| H  | -5.5724  | 2.9752  | 8.4486  | C                                             | -5.1092  | 7.7511  | 4.2342 |
| H  | -11.3837 | 2.0432  | 5.2280  | H                                             | -4.8988  | 8.7913  | 3.9996 |
| H  | -11.4722 | 1.0185  | 3.7946  | C                                             | -6.2782  | 7.1605  | 3.7511 |
| H  | -11.6783 | 0.2885  | 5.4166  | H                                             | -6.9517  | 7.7465  | 3.1356 |
| H  | -7.0585  | -1.3720 | 0.6154  | C                                             | -9.4197  | 6.9625  | 2.8754 |
| H  | -8.6138  | -1.9383 | 1.2719  | C                                             | -9.6847  | 8.2572  | 3.3114 |
| H  | -7.1470  | -2.8797 | 1.5958  | H                                             | -9.6877  | 8.5241  | 4.3598 |
| H  | -2.3965  | 0.6244  | 4.3838  | C                                             | -9.9416  | 9.2554  | 2.3672 |
| H  | -2.7128  | -1.1333 | 4.3179  |                                               |          |         |        |





|    |          |         |         |   |          |         |        |
|----|----------|---------|---------|---|----------|---------|--------|
| H  | -8.7844  | 3.4562  | 2.5963  | O | -9.2242  | -0.2709 | 5.7179 |
| C  | -10.5003 | 4.0033  | 4.2858  | O | -5.1086  | -0.1672 | 6.3092 |
| H  | -10.8311 | 3.6439  | 3.3184  | O | -4.9344  | 1.4637  | 4.7382 |
| H  | -9.7400  | 3.4138  | 4.7883  | O | -6.6351  | -0.2084 | 3.0041 |
| C  | -6.6290  | 5.6948  | 4.1843  | O | -6.9331  | -1.7616 | 4.6329 |
| C  | -5.5198  | 7.8160  | 4.6730  | O | -7.3373  | 2.8094  | 5.7841 |
| H  | -5.5592  | 8.9017  | 4.7122  | O | -7.3835  | 1.2542  | 7.4350 |
| C  | -6.6437  | 7.1031  | 4.2552  | C | -9.6853  | 0.4514  | 4.7806 |
| H  | -7.5351  | 7.6508  | 3.9667  | C | -7.4200  | 2.4481  | 7.0041 |
| C  | -9.7237  | 6.4850  | 3.1795  | C | -4.4552  | 0.6818  | 5.6227 |
| C  | -10.4674 | 7.5692  | 3.6542  | C | -6.7005  | -1.4031 | 3.4330 |
| H  | -10.5703 | 7.7644  | 4.7140  | C | -7.6080  | 3.5434  | 8.0286 |
| C  | -11.1074 | 8.4292  | 2.7574  | C | -2.9639  | 0.7619  | 5.8470 |
| H  | -11.6844 | 9.2615  | 3.1522  | C | -6.4346  | -2.4980 | 2.4276 |
| C  | -11.0298 | 8.2361  | 1.3759  | C | -11.1843 | 0.4801  | 4.5918 |
| C  | -10.2645 | 7.1521  | 0.9146  | H | -7.0105  | 4.4190  | 7.7609 |
| C  | -9.6208  | 6.2879  | 1.7932  | H | -8.6644  | 3.8385  | 8.0477 |
| H  | -9.0469  | 5.4575  | 1.4004  | H | -7.3308  | 3.1888  | 9.0237 |
| C  | -5.4438  | 5.0254  | 4.5534  | H | -11.6491 | -0.4064 | 5.0284 |
| H  | -5.4091  | 3.9465  | 4.5251  | H | -11.5841 | 1.3697  | 5.0958 |
| C  | -4.3216  | 5.7451  | 4.9658  | H | -11.4319 | 0.5539  | 3.5296 |
| H  | -3.4207  | 5.2047  | 5.2471  | H | -6.9656  | -3.4117 | 2.7059 |
| C  | -4.3496  | 7.1409  | 5.0298  | H | -5.3584  | -2.7118 | 2.4225 |
| H  | -10.1736 | 6.9771  | -0.1547 | H | -6.7251  | -2.1764 | 1.4248 |
| N  | -9.1412  | 5.5059  | 4.0825  | H | -2.6411  | 1.8070  | 5.8435 |
| H  | -3.4728  | 7.6952  | 5.3545  | H | -2.4552  | 0.2517  | 5.0202 |
| C  | -6.0648  | 4.1801  | 0.3849  | H | -2.6843  | 0.2816  | 6.7870 |
| H  | -6.8444  | 4.9294  | 0.5440  |   |          |         |        |
| H  | -5.1301  | 4.5045  | 0.8470  |   |          |         |        |
| H  | -5.9241  | 4.0038  | -0.6852 |   |          |         |        |
| C  | -16.5904 | 6.4023  | 3.3071  |   |          |         |        |
| H  | -17.1382 | 5.5626  | 2.8590  |   |          |         |        |
| H  | -17.1873 | 6.7777  | 4.1447  |   |          |         |        |
| H  | -16.5347 | 7.1902  | 2.5465  |   |          |         |        |
| C  | -11.7594 | 9.1359  | 0.4092  |   |          |         |        |
| H  | -11.1257 | 9.4063  | -0.4435 |   |          |         |        |
| H  | -12.6479 | 8.6333  | 0.0036  |   |          |         |        |
| H  | -12.0938 | 10.0588 | 0.8940  |   |          |         |        |
| Rh | -6.9540  | 1.3717  | 4.2969  |   |          |         |        |
| Rh | -7.1695  | -0.2947 | 6.0729  |   |          |         |        |
| O  | -9.0043  | 1.1929  | 3.9969  |   |          |         |        |

  

| <b>t-C-OAc-Me-Me</b>                          |          |        |        |
|-----------------------------------------------|----------|--------|--------|
| <b>Energy (POTENTIAL) = -2854.29577078 Eh</b> |          |        |        |
| Atom                                          | X        | Y      | Z      |
| S                                             | -8.3932  | 2.5567 | 1.3883 |
| O                                             | -9.8009  | 2.0732 | 1.4495 |
| O                                             | -7.3899  | 1.6394 | 0.8208 |
| N                                             | -11.8383 | 4.5659 | 4.7474 |
| N                                             | -7.8293  | 3.1381 | 2.8368 |
| C                                             | -12.9067 | 6.0890 | 0.9140 |
| C                                             | -13.2178 | 6.7980 | 2.0829 |
| H                                             | -13.7170 | 7.7603 | 2.0115 |
| C                                             | -12.8849 | 6.3062 | 3.3417 |
| H                                             | -13.1500 | 6.8856 | 4.2167 |

|   |          |         |        |    |          |         |         |
|---|----------|---------|--------|----|----------|---------|---------|
| C | -12.2354 | 5.0713  | 3.4491 | H  | -7.4364  | 4.4786  | 0.3123  |
| C | -11.9453 | 4.3277  | 2.2979 | H  | -8.7083  | 3.6867  | -0.6761 |
| H | -11.4169 | 3.3812  | 2.3426 | C  | -13.1983 | 6.6746  | -0.4431 |
| C | -12.2796 | 4.8420  | 1.0485 | H  | -12.4198 | 7.3984  | -0.7200 |
| H | -12.0214 | 4.2666  | 0.1639 | H  | -13.2227 | 5.9020  | -1.2182 |
| C | -11.3941 | 5.5259  | 5.8069 | H  | -14.1547 | 7.2092  | -0.4522 |
| H | -11.7073 | 5.1163  | 6.7682 | C  | -10.6625 | 11.0006 | 1.8232  |
| H | -11.9211 | 6.4606  | 5.6489 | H  | -10.8876 | 11.8169 | 2.5189  |
| C | -9.8677  | 5.7216  | 5.8032 | H  | -9.8655  | 11.3414 | 1.1513  |
| H | -9.6504  | 6.4582  | 6.5924 | H  | -11.5572 | 10.8441 | 1.2040  |
| H | -9.3910  | 4.7843  | 6.0963 | Rh | -7.5879  | 1.5835  | 4.5151  |
| C | -8.2151  | 5.2657  | 4.0337 | Rh | -7.1344  | 0.0158  | 6.3385  |
| C | -8.6098  | 4.1898  | 3.3028 | O  | -9.6313  | 1.2713  | 4.8820  |
| H | -9.6739  | 4.1594  | 3.0885 | O  | -9.1854  | -0.2674 | 6.4942  |
| C | -11.7739 | 3.3054  | 5.0031 | O  | -5.1153  | 0.3742  | 6.0562  |
| H | -12.0922 | 2.5744  | 4.2724 | O  | -5.5377  | 1.7538  | 4.3038  |
| H | -11.3992 | 2.9889  | 5.9672 | O  | -7.5862  | -0.0534 | 3.2495  |
| C | -6.8530  | 5.6514  | 4.4400 | O  | -7.0734  | -1.4963 | 4.9244  |
| C | -5.3714  | 7.1622  | 5.6699 | O  | -7.5823  | 3.0769  | 5.9648  |
| H | -5.2517  | 8.0378  | 6.3037 | O  | -7.1996  | 1.6186  | 7.6603  |
| C | -6.6510  | 6.7811  | 5.2617 | C  | -9.9689  | 0.3825  | 5.7338  |
| H | -7.5023  | 7.3722  | 5.5822 | C  | -7.3813  | 2.7854  | 7.1870  |
| C | -9.5960  | 7.3090  | 3.9000 | C  | -4.7619  | 1.1602  | 5.1189  |
| C | -10.2765 | 8.3477  | 4.5659 | C  | -7.3227  | -1.2082 | 3.7094  |
| H | -10.5420 | 8.2531  | 5.6135 | C  | -7.3963  | 3.9382  | 8.1645  |
| C | -10.6041 | 9.5301  | 3.8971 | C  | -3.2867  | 1.4518  | 4.9801  |
| H | -11.1318 | 10.3093 | 4.4437 | C  | -7.3189  | -2.3381 | 2.7067  |
| C | -10.2684 | 9.7396  | 2.5556 | C  | -11.4458 | 0.0855  | 5.8775  |
| C | -9.5656  | 8.7111  | 1.9065 | H  | -7.0510  | 4.8522  | 7.6753  |
| C | -9.2339  | 7.5256  | 2.5526 | H  | -8.4246  | 4.0984  | 8.5119  |
| H | -8.6950  | 6.7511  | 2.0177 | H  | -6.7732  | 3.7121  | 9.0332  |
| C | -5.7112  | 4.9212  | 4.0417 | H  | -11.8757 | 0.7374  | 6.6483  |
| H | -5.8378  | 4.0340  | 3.4378 | H  | -11.9709 | 0.2630  | 4.9359  |
| C | -4.4366  | 5.3068  | 4.4518 | H  | -11.5905 | -0.9495 | 6.1958  |
| H | -3.5786  | 4.7187  | 4.1339 | H  | -6.6585  | -2.0843 | 1.8715  |
| C | -4.2531  | 6.4267  | 5.2704 | H  | -8.3298  | -2.4615 | 2.3018  |
| H | -9.2749  | 8.8386  | 0.8653 | H  | -6.9947  | -3.2724 | 3.1694  |
| N | -9.3018  | 6.0870  | 4.5160 | H  | -3.0496  | 2.3329  | 5.5892  |
| H | -3.2566  | 6.7194  | 5.5914 | H  | -3.0373  | 1.6769  | 3.9405  |
| C | -8.4299  | 4.0251  | 0.3259 | H  | -2.6910  | 0.6103  | 5.3420  |
| H | -9.1703  | 4.7357  | 0.6995 |    |          |         |         |

**A2-OAc-Me-Me****Energy (POTENTIAL) = -2854.27559853 Eh**

| Atom | X        | Y       | Z       |
|------|----------|---------|---------|
| S    | -3.9616  | 1.6164  | 0.5168  |
| O    | -4.6664  | 0.4389  | -0.0200 |
| O    | -2.7217  | 1.3988  | 1.2911  |
| N    | -9.9681  | 4.5127  | 2.1759  |
| N    | -5.1143  | 2.5327  | 1.3916  |
| C    | -13.3769 | 4.7418  | 4.6947  |
| C    | -13.1224 | 3.6099  | 3.9059  |
| H    | -13.8138 | 2.7698  | 3.9400  |
| C    | -12.0011 | 3.5180  | 3.0857  |
| H    | -11.8421 | 2.6131  | 2.5095  |
| C    | -11.0708 | 4.5791  | 3.0144  |
| C    | -11.3180 | 5.7194  | 3.8086  |
| H    | -10.6312 | 6.5594  | 3.7883  |
| C    | -12.4477 | 5.7871  | 4.6253  |
| H    | -12.6050 | 6.6811  | 5.2257  |
| C    | -9.5436  | 3.2534  | 1.5719  |
| H    | -10.3148 | 2.8591  | 0.9035  |
| H    | -9.3144  | 2.5028  | 2.3357  |
| C    | -8.2974  | 3.6602  | 0.7958  |
| H    | -7.5776  | 2.8450  | 0.7247  |
| H    | -8.5628  | 4.0063  | -0.2146 |
| C    | -5.7751  | 3.1418  | 3.6467  |
| C    | -4.8529  | 2.6460  | 2.6486  |
| H    | -3.9274  | 2.2376  | 3.0803  |
| C    | -8.8035  | 5.3509  | 2.4237  |
| H    | -8.5094  | 5.3438  | 3.4866  |
| H    | -9.0066  | 6.3924  | 2.1367  |
| C    | -5.6571  | 4.4379  | 4.2073  |
| C    | -6.3406  | 6.0968  | 5.8609  |
| H    | -7.0019  | 6.4129  | 6.6621  |
| C    | -6.5195  | 4.8589  | 5.2629  |
| H    | -7.3125  | 4.1974  | 5.5845  |
| C    | -6.7686  | 5.6010  | 1.0648  |
| C    | -6.4401  | 6.8234  | 1.6857  |
| H    | -6.9373  | 7.1206  | 2.6023  |
| C    | -5.4500  | 7.6519  | 1.1542  |
| H    | -5.2239  | 8.5866  | 1.6631  |
| C    | -4.7363  | 7.3036  | 0.0030  |
| C    | -5.0560  | 6.0761  | -0.6008 |
| C    | -6.0455  | 5.2407  | -0.0931 |
| H    | -6.2482  | 4.2992  | -0.5866 |
| C    | -4.6342  | 5.3305  | 3.7703  |
| H    | -3.9906  | 5.0399  | 2.9462  |
| C    | -4.4432  | 6.5508  | 4.4020  |
| H    | -3.6494  | 7.2137  | 4.0723  |
| C    | -5.2940  | 6.9344  | 5.4455  |
| H    | -4.5180  | 5.7665  | -1.4947 |
| N    | -7.7491  | 4.7664  | 1.5946  |
| H    | -5.1467  | 7.8936  | 5.9345  |
| C    | -3.6021  | 2.7396  | -0.8327 |
| H    | -4.5209  | 2.9260  | -1.3903 |
| H    | -3.1965  | 3.6670  | -0.4241 |
| H    | -2.8636  | 2.2427  | -1.4679 |
| C    | -14.6063 | 4.8252  | 5.5688  |
| H    | -14.5295 | 5.6463  | 6.2904  |
| H    | -15.5154 | 4.9942  | 4.9751  |
| H    | -14.7623 | 3.8971  | 6.1327  |
| C    | -3.6779  | 8.2076  | -0.5829 |
| H    | -3.3684  | 8.9783  | 0.1315  |
| H    | -2.7844  | 7.6434  | -0.8780 |
| H    | -4.0410  | 8.7223  | -1.4833 |
| Rh   | -6.7979  | 1.5146  | 4.3682  |
| Rh   | -7.9210  | -0.4953 | 5.2554  |
| O    | -8.5433  | 2.5547  | 4.8209  |
| O    | -9.5014  | 0.7390  | 5.7888  |
| O    | -6.2462  | -1.5862 | 4.6886  |
| O    | -5.1431  | 0.2922  | 4.0589  |
| O    | -7.5038  | 0.9365  | 2.5140  |
| O    | -8.6890  | -0.8106 | 3.3509  |
| O    | -6.1659  | 1.8953  | 6.3089  |
| O    | -7.0454  | -0.0497 | 7.0897  |
| C    | -9.4372  | 1.9793  | 5.5362  |
| C    | -6.3934  | 1.0292  | 7.2236  |
| C    | -5.2469  | -0.9741 | 4.2082  |
| C    | -8.2852  | -0.0688 | 2.4047  |
| C    | -5.7998  | 1.3347  | 8.5776  |
| C    | -4.0564  | -1.7812 | 3.7537  |
| C    | -8.7810  | -0.3580 | 1.0092  |
| C    | -10.4709 | 2.8697  | 6.1766  |

|   |          |         |        |
|---|----------|---------|--------|
| H | -5.9647  | 2.3863  | 8.8298 |
| H | -6.2320  | 0.6895  | 9.3450 |
| H | -4.7169  | 1.1667  | 8.5346 |
| H | -10.5700 | 3.8125  | 5.6392 |
| H | -11.4342 | 2.3590  | 6.2315 |
| H | -10.1366 | 3.0790  | 7.2014 |
| H | -7.9578  | -0.2583 | 0.2961 |
| H | -9.5467  | 0.3813  | 0.7461 |
| H | -9.2153  | -1.3581 | 0.9512 |
| H | -3.1501  | -1.4061 | 4.2402 |
| H | -3.9303  | -1.6456 | 2.6737 |
| H | -4.1923  | -2.8399 | 3.9814 |

### B\_2-OAc-Me-Me

Energy (POTENTIAL) = -2854.29653367 Eh

| Atom | X        | Y      | Z      |
|------|----------|--------|--------|
| S    | -7.7137  | 2.0595 | 4.5955 |
| O    | -6.9687  | 1.5220 | 5.7567 |
| O    | -6.8739  | 2.3214 | 3.3877 |
| N    | -10.4387 | 6.1684 | 3.1923 |
| N    | -8.6424  | 3.3812 | 4.8997 |
| C    | -13.9856 | 8.0337 | 4.5631 |
| C    | -13.8252 | 6.6379 | 4.5843 |
| H    | -14.6204 | 6.0150 | 4.9899 |
| C    | -12.6699 | 6.0238 | 4.1155 |
| H    | -12.5661 | 4.9482 | 4.1845 |
| C    | -11.6039 | 6.7963 | 3.6084 |
| C    | -11.7614 | 8.1941 | 3.5597 |
| H    | -10.9812 | 8.8256 | 3.1460 |
| C    | -12.9319 | 8.7893 | 4.0392 |
| H    | -13.0214 | 9.8727 | 3.9948 |
| C    | -10.3831 | 4.7621 | 2.7909 |
| H    | -11.1080 | 4.5344 | 1.9969 |
| H    | -10.5594 | 4.1080 | 3.6428 |
| C    | -8.9584  | 4.6147 | 2.2611 |
| H    | -8.4651  | 3.6837 | 2.5112 |
| H    | -8.9061  | 4.7908 | 1.1858 |
| C    | -7.7573  | 5.6473 | 4.3260 |
| C    | -7.9155  | 4.5632 | 5.1091 |
| H    | -7.4737  | 4.6914 | 6.1003 |
| C    | -9.2801  | 6.8666 | 2.7434 |

|    |          |         |         |
|----|----------|---------|---------|
| H  | -9.0341  | 7.7300  | 3.3590  |
| H  | -9.3019  | 7.1478  | 1.6827  |
| C  | -7.1615  | 6.8833  | 4.9211  |
| C  | -7.4383  | 8.7619  | 6.4452  |
| H  | -8.0575  | 9.3173  | 7.1448  |
| C  | -7.9447  | 7.6157  | 5.8298  |
| H  | -8.9441  | 7.2594  | 6.0544  |
| C  | -6.9666  | 6.0817  | 2.0573  |
| C  | -6.7185  | 7.3465  | 1.5327  |
| H  | -7.4015  | 8.1738  | 1.6791  |
| C  | -5.5317  | 7.5666  | 0.8276  |
| H  | -5.3387  | 8.5569  | 0.4243  |
| C  | -4.5873  | 6.5499  | 0.6516  |
| C  | -4.8638  | 5.2895  | 1.2068  |
| C  | -6.0398  | 5.0475  | 1.9107  |
| H  | -6.2185  | 4.0779  | 2.3653  |
| C  | -5.8476  | 7.3075  | 4.6622  |
| H  | -5.2144  | 6.7344  | 3.9940  |
| C  | -5.3426  | 8.4532  | 5.2798  |
| H  | -4.3222  | 8.7660  | 5.0750  |
| C  | -6.1372  | 9.1872  | 6.1654  |
| H  | -4.1412  | 4.4848  | 1.0970  |
| N  | -8.1892  | 5.7967  | 2.8748  |
| H  | -5.7389  | 10.0785 | 6.6430  |
| C  | -8.9572  | 0.8651  | 4.0976  |
| H  | -9.6234  | 0.6661  | 4.9354  |
| H  | -9.5035  | 1.2660  | 3.2418  |
| H  | -8.4162  | -0.0410 | 3.8112  |
| C  | -15.2403 | 8.6783  | 5.1032  |
| H  | -15.3382 | 8.5182  | 6.1855  |
| H  | -15.2433 | 9.7595  | 4.9268  |
| H  | -16.1422 | 8.2603  | 4.6376  |
| C  | -3.3039  | 6.7885  | -0.1041 |
| H  | -3.1671  | 7.8480  | -0.3423 |
| H  | -2.4367  | 6.4534  | 0.4773  |
| H  | -3.2935  | 6.2272  | -1.0474 |
| Rh | -10.1461 | 3.2776  | 6.6100  |
| Rh | -11.8311 | 3.2551  | 8.3787  |
| O  | -10.5175 | 5.3234  | 6.4293  |
| O  | -12.1343 | 5.2680  | 8.0215  |
| O  | -11.4270 | 1.2427  | 8.6731  |

|   |          |         |         |   |          |        |        |
|---|----------|---------|---------|---|----------|--------|--------|
| O | -9.8947  | 1.2511  | 7.0007  | H | -9.6028  | 6.4459 | 4.9457 |
| O | -11.6682 | 2.8060  | 5.2719  | C | -11.5663 | 6.0251 | 5.6805 |
| O | -13.2297 | 2.7527  | 6.9188  | H | -11.5373 | 6.8707 | 6.3647 |
| O | -8.7425  | 3.7454  | 8.0559  | C | -9.3679  | 3.3523 | 2.1751 |
| O | -10.3076 | 3.7598  | 9.7011  | H | -10.2230 | 3.4443 | 1.4900 |
| C | -11.3761 | 5.8705  | 7.1960  | H | -9.4078  | 2.3794 | 2.6616 |
| C | -9.1196  | 3.8887  | 9.2651  | C | -8.0670  | 3.5594 | 1.3910 |
| C | -10.5687 | 0.6834  | 7.9220  | H | -7.4938  | 2.6540 | 1.2251 |
| C | -12.8568 | 2.6531  | 5.7085  | H | -8.2739  | 4.0564 | 0.4448 |
| C | -8.0441  | 4.2095  | 10.2749 | C | -6.3367  | 3.8070 | 3.2674 |
| C | -10.3135 | -0.7920 | 8.1169  | C | -5.2735  | 3.0709 | 2.7067 |
| C | -13.9272 | 2.3585  | 4.6842  | H | -4.5070  | 2.7802 | 3.4266 |
| C | -11.4716 | 7.3762  | 7.1733  | C | -8.3605  | 5.3798 | 2.8264 |
| H | -7.2370  | 4.7789  | 9.8076  | H | -7.9964  | 5.9476 | 3.6757 |
| H | -8.4631  | 4.7624  | 11.1190 | H | -8.6659  | 6.0658 | 2.0238 |
| H | -7.6257  | 3.2677  | 10.6514 | C | -6.0883  | 4.5469 | 4.5425 |
| H | -10.7265 | 7.7739  | 7.8742  | C | -6.8147  | 5.3565 | 6.7240 |
| H | -11.2613 | 7.7698  | 6.1788  | H | -7.5988  | 5.4445 | 7.4721 |
| H | -12.4604 | 7.6998  | 7.5043  | C | -7.0773  | 4.6779 | 5.5350 |
| H | -13.4854 | 2.0212  | 3.7444  | H | -8.0402  | 4.2092 | 5.3803 |
| H | -14.4973 | 3.2769  | 4.4980  | C | -6.3657  | 5.4587 | 1.4079 |
| H | -14.6222 | 1.6066  | 5.0688  | C | -5.8753  | 6.6169 | 2.0162 |
| H | -9.2415  | -0.9622 | 8.2600  | H | -6.1208  | 6.8569 | 3.0424 |
| H | -10.6166 | -1.3314 | 7.2122  | C | -5.0364  | 7.4715 | 1.3020 |
| H | -10.8702 | -1.1757 | 8.9741  | H | -4.6607  | 8.3670 | 1.7898 |

**B2-OAc-Me-Me**

**Energy (POTENTIAL) = -2854.29089146 Eh**

| Atom | X        | Y      | Z       |
|------|----------|--------|---------|
| S    | -3.8165  | 1.8107 | 1.0341  |
| O    | -4.2469  | 0.5303 | 0.4285  |
| O    | -2.7816  | 1.7615 | 2.0943  |
| N    | -9.3469  | 4.4097 | 3.1755  |
| N    | -5.1520  | 2.7081 | 1.4412  |
| C    | -12.7089 | 5.2126 | 5.6394  |
| C    | -12.6911 | 4.1348 | 4.7464  |
| H    | -13.5542 | 3.4746 | 4.6890  |
| C    | -11.5935 | 3.8729 | 3.9269  |
| H    | -11.6232 | 3.0135 | 3.2667  |
| C    | -10.4513 | 4.6963 | 3.9713  |
| C    | -10.4604 | 5.7863 | 4.8676  |
| H    | -9.6028  | 6.4459 | 4.9457  |
| C    | -11.5663 | 6.0251 | 5.6805  |
| H    | -11.5373 | 6.8707 | 6.3647  |
| C    | -9.3679  | 3.3523 | 2.1751  |
| H    | -10.2230 | 3.4443 | 1.4900  |
| H    | -9.4078  | 2.3794 | 2.6616  |
| C    | -8.0670  | 3.5594 | 1.3910  |
| H    | -7.4938  | 2.6540 | 1.2251  |
| H    | -8.2739  | 4.0564 | 0.4448  |
| C    | -6.3367  | 3.8070 | 3.2674  |
| C    | -5.2735  | 3.0709 | 2.7067  |
| H    | -4.5070  | 2.7802 | 3.4266  |
| C    | -8.3605  | 5.3798 | 2.8264  |
| H    | -7.9964  | 5.9476 | 3.6757  |
| H    | -8.6659  | 6.0658 | 2.0238  |
| C    | -6.0883  | 4.5469 | 4.5425  |
| C    | -6.8147  | 5.3565 | 6.7240  |
| H    | -7.5988  | 5.4445 | 7.4721  |
| C    | -7.0773  | 4.6779 | 5.5350  |
| H    | -8.0402  | 4.2092 | 5.3803  |
| C    | -6.3657  | 5.4587 | 1.4079  |
| C    | -5.8753  | 6.6169 | 2.0162  |
| H    | -6.1208  | 6.8569 | 3.0424  |
| C    | -5.0364  | 7.4715 | 1.3020  |
| H    | -4.6607  | 8.3670 | 1.7898  |
| C    | -4.6714  | 7.1958 | -0.0219 |
| C    | -5.1767  | 6.0283 | -0.6085 |
| C    | -6.0128  | 5.1585 | 0.0925  |
| H    | -6.3471  | 4.2496 | -0.3854 |
| C    | -4.8209  | 5.1054 | 4.7961  |
| H    | -4.0467  | 5.0390 | 4.0372  |
| C    | -4.5479  | 5.7592 | 5.9997  |
| H    | -3.5586  | 6.1754 | 6.1720  |
| C    | -5.5469  | 5.8953 | 6.9664  |
| H    | -4.9045  | 5.7809 | -1.6314 |
| N    | -7.2357  | 4.5426 | 2.2258  |
| H    | -5.3400  | 6.4144 | 7.8988  |
| C    | -3.1497  | 2.8143 | -0.3045 |
| H    | -3.9087  | 2.9258 | -1.0814 |
| H    | -2.8590  | 3.7897 | 0.0918  |
| H    | -2.2768  | 2.2879 | -0.7011 |

|    |          |         |         |      |          |        |         |
|----|----------|---------|---------|------|----------|--------|---------|
| C  | -13.9146 | 5.5117  | 6.4988  | Atom | X        | Y      | Z       |
| H  | -13.6211 | 5.9037  | 7.4798  | S    | -3.8643  | 1.6657 | 0.6714  |
| H  | -14.5643 | 6.2657  | 6.0325  | O    | -4.3020  | 0.3009 | 0.3210  |
| H  | -14.5232 | 4.6152  | 6.6618  | O    | -2.6790  | 1.8178 | 1.5413  |
| C  | -3.7819  | 8.1322  | -0.8012 | N    | -9.8318  | 4.4401 | 2.2944  |
| H  | -3.1748  | 8.7556  | -0.1366 | N    | -5.2209  | 2.5067 | 1.2610  |
| H  | -3.1083  | 7.5802  | -1.4662 | C    | -13.3265 | 4.9524 | 4.6434  |
| H  | -4.3788  | 8.8057  | -1.4310 | C    | -13.1829 | 3.8665 | 3.7686  |
| Rh | -6.9531  | 1.3475  | 4.2233  | H    | -13.9875 | 3.1382 | 3.6874  |
| Rh | -7.4912  | -0.7888 | 5.2685  | C    | -12.0321 | 3.6788 | 3.0057  |
| O  | -8.7215  | 2.0676  | 5.0633  | H    | -11.9644 | 2.8133 | 2.3556  |
| O  | -9.1793  | 0.0914  | 6.0755  | C    | -10.9614 | 4.5956 | 3.0816  |
| O  | -5.7625  | -1.5783 | 4.4534  | C    | -11.0966 | 5.6908 | 3.9636  |
| O  | -5.2312  | 0.4273  | 3.5453  | H    | -10.3000 | 6.4218 | 4.0579  |
| O  | -7.9390  | 0.6505  | 2.5323  | C    | -12.2552 | 5.8527 | 4.7226  |
| O  | -8.5078  | -1.3030 | 3.5324  | H    | -12.3234 | 6.7053 | 5.3958  |
| O  | -5.9569  | 1.8466  | 5.9623  | C    | -9.5099  | 3.1830 | 1.6364  |
| O  | -6.4349  | -0.1482 | 6.9317  | H    | -10.2718 | 2.9177 | 0.8964  |
| C  | -9.3929  | 1.3268  | 5.8516  | H    | -9.4129  | 2.3683 | 2.3564  |
| C  | -5.9029  | 1.0082  | 6.9190  | C    | -8.1956  | 3.5016 | 0.9439  |
| C  | -5.0133  | -0.8056 | 3.7714  | H    | -7.5545  | 2.6348 | 0.8251  |
| C  | -8.4896  | -0.4992 | 2.5485  | H    | -8.3898  | 3.9684 | -0.0280 |
| C  | -5.1088  | 1.4250  | 8.1324  | C    | -6.1724  | 3.4135 | 3.3418  |
| C  | -3.7662  | -1.3823 | 3.1546  | C    | -5.1258  | 2.9010 | 2.4872  |
| C  | -9.1539  | -0.9431 | 1.2682  | H    | -4.2000  | 2.7221 | 3.0502  |
| C  | -10.5548 | 1.9558  | 6.5817  | C    | -8.6238  | 5.1839 | 2.5906  |
| H  | -5.1995  | 2.5025  | 8.2905  | H    | -8.3828  | 5.1824 | 3.6581  |
| H  | -5.4391  | 0.8781  | 9.0184  | H    | -8.7249  | 6.2248 | 2.2657  |
| H  | -4.0511  | 1.1949  | 7.9532  | C    | -5.8797  | 4.5449 | 4.1992  |
| H  | -10.4957 | 3.0441  | 6.5468  | C    | -6.4460  | 5.9583 | 6.1062  |
| H  | -11.4914 | 1.6405  | 6.1098  | H    | -7.1091  | 6.1981 | 6.9326  |
| H  | -10.5651 | 1.6056  | 7.6181  | C    | -6.7282  | 4.8700 | 5.2870  |
| H  | -8.3764  | -1.2620 | 0.5636  | H    | -7.5926  | 4.2478 | 5.4817  |
| H  | -9.6949  | -0.1080 | 0.8141  | C    | -6.6261  | 5.4177 | 1.1867  |
| H  | -9.8311  | -1.7799 | 1.4510  | C    | -6.2970  | 6.6424 | 1.7922  |
| H  | -2.9187  | -0.7261 | 3.3703  | H    | -6.7374  | 6.9263 | 2.7403  |
| H  | -3.8915  | -1.3822 | 2.0668  | C    | -5.3818  | 7.5078 | 1.1912  |
| H  | -3.5798  | -2.3945 | 3.5188  | H    | -5.1449  | 8.4453 | 1.6883  |
|    |          |         |         | C    | -4.7597  | 7.1887 | -0.0200 |
|    |          |         |         | C    | -5.0922  | 5.9613 | -0.6143 |
|    |          |         |         | C    | -6.0038  | 5.0872 | -0.0295 |

**A-B-ts2-OAc-Me-Me**

**Energy (POTENTIAL) = -2854.27226276 Eh**

|    |          |         |         |   |          |         |        |
|----|----------|---------|---------|---|----------|---------|--------|
| H  | -6.2130  | 4.1440  | -0.5137 | H | -4.5384  | 1.5082  | 8.2332 |
| C  | -4.7340  | 5.3507  | 3.9820  | H | -10.8127 | 3.5429  | 5.7062 |
| H  | -4.0734  | 5.1279  | 3.1504  | H | -11.6786 | 1.9890  | 5.8804 |
| C  | -4.4366  | 6.4159  | 4.8266  | H | -10.6268 | 2.5538  | 7.1838 |
| H  | -3.5456  | 7.0119  | 4.6510  | H | -8.2420  | -0.5486 | 0.3029 |
| C  | -5.2979  | 6.7285  | 5.8830  | H | -9.8478  | -0.0738 | 0.8773 |
| H  | -4.6275  | 5.6797  | -1.5564 | H | -9.2903  | -1.7481 | 1.1259 |
| N  | -7.5331  | 4.5137  | 1.8289  | H | -3.0072  | -0.8512 | 3.8494 |
| H  | -5.0723  | 7.5679  | 6.5354  | H | -3.8927  | -1.2816 | 2.3854 |
| C  | -3.5738  | 2.5705  | -0.8495 | H | -3.8658  | -2.4225 | 3.7713 |
| H  | -4.4769  | 2.5299  | -1.4616 |   |          |         |        |
| H  | -3.3169  | 3.6026  | -0.6039 |   |          |         |        |
| H  | -2.7435  | 2.0777  | -1.3626 |   |          |         |        |
| C  | -14.5909 | 5.1613  | 5.4431  |   |          |         |        |
| H  | -14.3795 | 5.6107  | 6.4206  |   |          |         |        |
| H  | -15.2900 | 5.8331  | 4.9249  |   |          |         |        |
| H  | -15.1182 | 4.2156  | 5.6131  |   |          |         |        |
| C  | -3.7867  | 8.1330  | -0.6825 |   |          |         |        |
| H  | -3.3778  | 8.8551  | 0.0323  |   |          |         |        |
| H  | -2.9498  | 7.5905  | -1.1372 |   |          |         |        |
| H  | -4.2741  | 8.7039  | -1.4847 |   |          |         |        |
| Rh | -6.9742  | 1.5930  | 4.1861  |   |          |         |        |
| Rh | -7.7550  | -0.4922 | 5.2506  |   |          |         |        |
| O  | -8.7829  | 2.4514  | 4.7566  |   |          |         |        |
| O  | -9.4623  | 0.5580  | 5.8111  |   |          |         |        |
| O  | -6.0010  | -1.3999 | 4.6097  |   |          |         |        |
| O  | -5.2170  | 0.5584  | 3.7789  |   |          |         |        |
| O  | -7.7464  | 0.8201  | 2.4211  |   |          |         |        |
| O  | -8.6135  | -1.0162 | 3.4344  |   |          |         |        |
| O  | -6.1945  | 2.1181  | 6.0384  |   |          |         |        |
| O  | -6.8351  | 0.1618  | 6.9953  |   |          |         |        |
| C  | -9.5788  | 1.7836  | 5.5030  |   |          |         |        |
| C  | -6.2753  | 1.3000  | 7.0146  |   |          |         |        |
| C  | -5.1365  | -0.6954 | 4.0041  |   |          |         |        |
| C  | -8.3950  | -0.2789 | 2.4254  |   |          |         |        |
| C  | -5.6098  | 1.7347  | 8.2987  |   |          |         |        |
| C  | -3.8957  | -1.3716 | 3.4774  |   |          |         |        |
| C  | -8.9769  | -0.7026 | 1.0984  |   |          |         |        |
| C  | -10.7508 | 2.5269  | 6.0947  |   |          |         |        |
| H  | -5.7187  | 2.8140  | 8.4345  |   |          |         |        |
| H  | -6.0293  | 1.1982  | 9.1527  |   |          |         |        |

  

| <b>A_-OAc-MeO-NO2</b>                         |          |         |         |  |  |  |  |
|-----------------------------------------------|----------|---------|---------|--|--|--|--|
| <b>Energy (POTENTIAL) = -3094.67101473 Eh</b> |          |         |         |  |  |  |  |
| Atom                                          | X        | Y       | Z       |  |  |  |  |
| S                                             | -5.6817  | 1.7613  | -0.3396 |  |  |  |  |
| O                                             | -7.0690  | 1.5209  | -0.7798 |  |  |  |  |
| O                                             | -4.7972  | 0.5973  | -0.1311 |  |  |  |  |
| N                                             | -10.0883 | 3.9732  | 1.9129  |  |  |  |  |
| N                                             | -5.7800  | 2.7574  | 1.0439  |  |  |  |  |
| C                                             | -13.2281 | 1.3267  | 1.2027  |  |  |  |  |
| C                                             | -13.5013 | 2.6156  | 1.6853  |  |  |  |  |
| H                                             | -14.5278 | 2.9118  | 1.8658  |  |  |  |  |
| C                                             | -12.4660 | 3.4992  | 1.9209  |  |  |  |  |
| H                                             | -12.6932 | 4.4975  | 2.2766  |  |  |  |  |
| C                                             | -11.1138 | 3.1187  | 1.6827  |  |  |  |  |
| C                                             | -10.8649 | 1.8044  | 1.1885  |  |  |  |  |
| H                                             | -9.8501  | 1.4784  | 0.9981  |  |  |  |  |
| C                                             | -11.9056 | 0.9280  | 0.9547  |  |  |  |  |
| H                                             | -11.7074 | -0.0703 | 0.5833  |  |  |  |  |
| C                                             | -10.1904 | 5.2296  | 2.6588  |  |  |  |  |
| H                                             | -10.9074 | 5.1471  | 3.4814  |  |  |  |  |
| H                                             | -10.5001 | 6.0516  | 2.0009  |  |  |  |  |
| C                                             | -8.7470  | 5.4184  | 3.1645  |  |  |  |  |
| H                                             | -8.4769  | 6.4670  | 3.2869  |  |  |  |  |
| H                                             | -8.6088  | 4.8941  | 4.1132  |  |  |  |  |
| C                                             | -5.6395  | 2.8536  | 3.4048  |  |  |  |  |
| C                                             | -5.2999  | 2.2541  | 2.1315  |  |  |  |  |
| H                                             | -4.7662  | 1.2966  | 2.1572  |  |  |  |  |
| C                                             | -8.6686  | 3.5821  | 1.7617  |  |  |  |  |
| H                                             | -8.4403  | 3.2434  | 0.7533  |  |  |  |  |
| H                                             | -8.4457  | 2.7674  | 2.4533  |  |  |  |  |



|    |         |         |         |   |          |         |         |
|----|---------|---------|---------|---|----------|---------|---------|
| C  | -5.1767 | 4.1266  | 3.8211  | C | -3.7717  | -1.8103 | 4.6035  |
| C  | -5.2880 | 6.0063  | 5.3670  | C | -8.6705  | -1.1153 | 1.6249  |
| H  | -5.7406 | 6.5005  | 6.2213  | C | -10.6224 | 2.8177  | 5.4735  |
| C  | -5.7524 | 4.7678  | 4.9551  | H | -4.5387  | 2.3594  | 8.5137  |
| H  | -6.5696 | 4.2820  | 5.4714  | H | -6.0942  | 3.1654  | 8.7548  |
| C  | -7.3559 | 5.5995  | 1.1351  | H | -5.8120  | 1.5642  | 9.4926  |
| C  | -7.5793 | 5.4461  | -0.2455 | H | -10.3939 | 3.8825  | 5.5583  |
| H  | -8.2584 | 4.6868  | -0.6166 | H | -11.1700 | 2.6576  | 4.5365  |
| C  | -6.9372 | 6.2676  | -1.1682 | H | -11.2544 | 2.4962  | 6.3041  |
| H  | -7.1171 | 6.1445  | -2.2325 | H | -8.3042  | -0.5577 | 0.7608  |
| C  | -6.0616 | 7.2787  | -0.7459 | H | -9.7660  | -1.1022 | 1.6385  |
| C  | -5.8417 | 7.4533  | 0.6258  | H | -8.3508  | -2.1603 | 1.5605  |
| C  | -6.4775 | 6.6149  | 1.5439  | H | -2.9294  | -1.3241 | 5.1092  |
| H  | -6.2703 | 6.7385  | 2.6017  | H | -3.5347  | -1.8621 | 3.5363  |
| C  | -4.1212 | 4.7831  | 3.1248  | H | -3.9069  | -2.8154 | 5.0074  |
| H  | -3.6882 | 4.3120  | 2.2486  | N | -14.3100 | 0.4124  | 0.9552  |
| C  | -3.6372 | 6.0044  | 3.5717  | O | -15.4702 | 0.7869  | 1.1909  |
| H  | -2.8205 | 6.4915  | 3.0481  | O | -14.0447 | -0.7174 | 0.5143  |
| C  | -4.2214 | 6.6166  | 4.6881  | O | -5.4841  | 8.0258  | -1.7346 |
| H  | -5.1670 | 8.2181  | 0.9934  | C | -4.5889  | 9.0640  | -1.3502 |
| N  | -7.9204 | 4.7649  | 2.1345  | H | -4.2545  | 9.5322  | -2.2788 |
| H  | -3.8485 | 7.5783  | 5.0298  | H | -5.0864  | 9.8185  | -0.7261 |
| C  | -4.8997 | 2.9065  | -1.4761 | H | -3.7166  | 8.6685  | -0.8125 |
| H  | -5.4967 | 3.8205  | -1.5124 |   |          |         |         |
| H  | -3.8884 | 3.1165  | -1.1198 |   |          |         |         |
| H  | -4.8688 | 2.4215  | -2.4554 |   |          |         |         |
| Rh | -6.6407 | 1.4370  | 4.4824  |   |          |         |         |
| Rh | -7.6951 | -0.3696 | 5.7902  |   |          |         |         |
| O  | -8.3496 | 2.5537  | 4.8524  |   |          |         |         |
| O  | -9.3817 | 0.8383  | 5.9229  |   |          |         |         |
| O  | -5.9381 | -1.4501 | 5.5331  |   |          |         |         |
| O  | -5.0196 | 0.1633  | 4.2299  |   |          |         |         |
| O  | -7.5164 | 0.5893  | 2.8053  |   |          |         |         |
| O  | -8.3982 | -1.1347 | 3.9883  |   |          |         |         |
| O  | -5.8267 | 2.1112  | 6.2663  |   |          |         |         |
| O  | -6.9042 | 0.5310  | 7.4918  |   |          |         |         |
| C  | -9.3540 | 2.0029  | 5.4269  |   |          |         |         |
| C  | -6.1590 | 1.5477  | 7.3663  |   |          |         |         |
| C  | -5.0140 | -0.9795 | 4.8082  |   |          |         |         |
| C  | -8.1559 | -0.5142 | 2.9093  |   |          |         |         |
| C  | -5.6145 | 2.1889  | 8.6196  |   |          |         |         |

  

| <b>A-B-ts-OAc-MeO-NO2</b>                     |          |        |         |  |  |  |  |
|-----------------------------------------------|----------|--------|---------|--|--|--|--|
| <b>Energy (POTENTIAL) = -3094.67007103 Eh</b> |          |        |         |  |  |  |  |
| Atom                                          | X        | Y      | Z       |  |  |  |  |
| S                                             | -5.4347  | 1.5099 | -0.2951 |  |  |  |  |
| O                                             | -6.6427  | 0.8800 | -0.8593 |  |  |  |  |
| O                                             | -4.3389  | 0.6364 | 0.1751  |  |  |  |  |
| N                                             | -10.0518 | 3.9575 | 1.9018  |  |  |  |  |
| N                                             | -5.9634  | 2.5935 | 0.9063  |  |  |  |  |
| C                                             | -13.3847 | 1.5076 | 1.3825  |  |  |  |  |
| C                                             | -13.5507 | 2.8138 | 1.8664  |  |  |  |  |
| H                                             | -14.5446 | 3.1737 | 2.1039  |  |  |  |  |
| C                                             | -12.4508 | 3.6331 | 2.0327  |  |  |  |  |
| H                                             | -12.5939 | 4.6460 | 2.3909  |  |  |  |  |
| C                                             | -11.1413 | 3.1676 | 1.7234  |  |  |  |  |
| C                                             | -11.0027 | 1.8421 | 1.2182  |  |  |  |  |
| H                                             | -10.0240 | 1.4498 | 0.9709  |  |  |  |  |
| C                                             | -12.1073 | 1.0286 | 1.0566  |  |  |  |  |

|    |          |         |         |   |          |         |         |
|----|----------|---------|---------|---|----------|---------|---------|
| H  | -11.9933 | 0.0173  | 0.6847  | O | -8.6516  | 2.4384  | 4.7078  |
| C  | -10.0193 | 5.1738  | 2.7168  | O | -9.4714  | 0.6602  | 5.8531  |
| H  | -10.7218 | 5.1132  | 3.5530  | O | -5.8430  | -1.2993 | 5.3989  |
| H  | -10.2590 | 6.0591  | 2.1148  | O | -5.0371  | 0.4608  | 4.2143  |
| C  | -8.5615  | 5.1927  | 3.2036  | O | -7.5362  | 0.5989  | 2.6946  |
| H  | -8.2001  | 6.1968  | 3.4127  | O | -8.3389  | -1.1697 | 3.8665  |
| H  | -8.4577  | 4.5715  | 4.0908  | O | -6.1064  | 2.2903  | 6.1974  |
| C  | -5.8936  | 3.0878  | 3.2802  | O | -6.9535  | 0.5510  | 7.3867  |
| C  | -5.4328  | 2.4415  | 2.0708  | C | -9.5740  | 1.8111  | 5.3346  |
| H  | -4.6469  | 1.6931  | 2.2508  | C | -6.3232  | 1.6462  | 7.2792  |
| C  | -8.6838  | 3.4610  | 1.6694  | C | -4.9431  | -0.7046 | 4.7342  |
| H  | -8.5233  | 3.1823  | 0.6326  | C | -8.1247  | -0.5320 | 2.7912  |
| H  | -8.4969  | 2.5856  | 2.2885  | C | -5.7354  | 2.2351  | 8.5389  |
| C  | -5.2827  | 4.2807  | 3.7719  | C | -3.6236  | -1.4073 | 4.5302  |
| C  | -5.1826  | 6.0837  | 5.4091  | C | -8.6233  | -1.1375 | 1.5024  |
| H  | -5.5648  | 6.5638  | 6.3052  | C | -10.9069 | 2.5118  | 5.4262  |
| C  | -5.7608  | 4.9082  | 4.9538  | H | -5.5844  | 3.3115  | 8.4311  |
| H  | -6.5863  | 4.4596  | 5.4885  | H | -6.3812  | 2.0225  | 9.3946  |
| C  | -7.2515  | 5.4342  | 1.1291  | H | -4.7619  | 1.7629  | 8.7209  |
| C  | -7.3850  | 5.2576  | -0.2625 | H | -10.7630 | 3.5780  | 5.6210  |
| H  | -7.9770  | 4.4475  | -0.6691 | H | -11.4233 | 2.4103  | 4.4645  |
| C  | -6.7652  | 6.1219  | -1.1555 | H | -11.5239 | 2.0644  | 6.2079  |
| H  | -6.8831  | 5.9815  | -2.2260 | H | -8.1530  | -0.6532 | 0.6440  |
| C  | -5.9836  | 7.1950  | -0.6982 | H | -9.7103  | -1.0017 | 1.4483  |
| C  | -5.8415  | 7.3854  | 0.6797  | H | -8.4201  | -2.2123 | 1.4944  |
| C  | -6.4663  | 6.5114  | 1.5728  | H | -2.8369  | -0.8569 | 5.0588  |
| H  | -6.3232  | 6.6759  | 2.6338  | H | -3.3710  | -1.4080 | 3.4651  |
| C  | -4.1991  | 4.8850  | 3.0761  | H | -3.6674  | -2.4314 | 4.9054  |
| H  | -3.8356  | 4.4311  | 2.1596  | N | -14.5329 | 0.6558  | 1.2152  |
| C  | -3.5988  | 6.0405  | 3.5630  | O | -15.6513 | 1.1010  | 1.5176  |
| H  | -2.7624  | 6.4838  | 3.0310  | O | -14.3615 | -0.4918 | 0.7752  |
| C  | -4.0944  | 6.6448  | 4.7232  | O | -5.4188  | 7.9780  | -1.6611 |
| H  | -5.2432  | 8.1972  | 1.0769  | C | -4.6135  | 9.0772  | -1.2434 |
| N  | -7.8110  | 4.5508  | 2.0977  | H | -4.2725  | 9.5644  | -2.1595 |
| H  | -3.6352  | 7.5563  | 5.0961  | H | -5.1897  | 9.7957  | -0.6457 |
| C  | -4.7851  | 2.6765  | -1.4941 | H | -3.7416  | 8.7416  | -0.6665 |
| H  | -5.5632  | 3.4063  | -1.7265 |   |          |         |         |
| H  | -3.9104  | 3.1719  | -1.0665 |   |          |         |         |
| H  | -4.5063  | 2.1081  | -2.3856 |   |          |         |         |
| Rh | -6.8039  | 1.5433  | 4.3901  |   |          |         |         |
| Rh | -7.6802  | -0.3735 | 5.6725  |   |          |         |         |

  

|                                               |         |        |        |
|-----------------------------------------------|---------|--------|--------|
| <b>B-OAc-MeO-NO2</b>                          |         |        |        |
| <b>Energy (POTENTIAL) = -3094.69045527 Eh</b> |         |        |        |
| Atom                                          | X       | Y      | Z      |
| S                                             | -5.2379 | 1.4326 | 0.0496 |

|   |          |        |         |    |          |         |         |
|---|----------|--------|---------|----|----------|---------|---------|
| O | -6.0562  | 0.2518 | -0.2938 | H  | -4.0831  | 4.8080  | 2.3247  |
| O | -3.9114  | 1.1939 | 0.6629  | C  | -3.5719  | 5.9826  | 4.0445  |
| N | -9.9883  | 3.9602 | 2.0243  | H  | -2.6483  | 6.3452  | 3.6009  |
| N | -6.1859  | 2.5016 | 0.9230  | C  | -3.9659  | 6.4230  | 5.3097  |
| C | -13.4711 | 2.1745 | 0.5927  | H  | -6.0613  | 8.3911  | 1.1247  |
| C | -13.5244 | 3.4655 | 1.1350  | N  | -7.7420  | 4.2967  | 2.5252  |
| H | -14.4695 | 3.9936 | 1.1720  | H  | -3.3479  | 7.1238  | 5.8647  |
| C | -12.3702 | 4.0572 | 1.6140  | C  | -4.9979  | 2.3879  | -1.4554 |
| H | -12.4171 | 5.0619 | 2.0184  | H  | -5.9753  | 2.6317  | -1.8769 |
| C | -11.1306 | 3.3692 | 1.5616  | H  | -4.4477  | 3.2997  | -1.2114 |
| C | -11.1021 | 2.0594 | 1.0125  | H  | -4.4255  | 1.7691  | -2.1518 |
| H | -10.1761 | 1.4969 | 0.9782  | Rh | -6.7547  | 1.5888  | 4.4355  |
| C | -12.2598 | 1.4740 | 0.5322  | Rh | -7.1071  | -0.4867 | 5.6876  |
| H | -12.2372 | 0.4725 | 0.1199  | O  | -8.6869  | 2.1331  | 5.0025  |
| C | -9.9588  | 5.1104 | 2.9311  | O  | -9.0227  | 0.1960  | 6.1319  |
| H | -10.7563 | 5.0608 | 3.6794  | O  | -5.1985  | -1.0660 | 5.1139  |
| H | -10.0477 | 6.0502 | 2.3760  | O  | -4.8609  | 0.8840  | 4.0077  |
| C | -8.5988  | 4.9616 | 3.6047  | O  | -7.5286  | 0.5875  | 2.7949  |
| H | -8.1636  | 5.8992 | 3.9315  | O  | -7.8541  | -1.3356 | 3.9487  |
| H | -8.6467  | 4.2513 | 4.4271  | O  | -5.9970  | 2.3883  | 6.1941  |
| C | -6.4255  | 3.6504 | 3.0667  | O  | -6.3340  | 0.4684  | 7.3589  |
| C | -5.7288  | 2.8710 | 2.0922  | C  | -9.4022  | 1.3179  | 5.6814  |
| H | -4.7439  | 2.5373 | 2.4211  | C  | -5.9376  | 1.6718  | 7.2456  |
| C | -8.7319  | 3.2411 | 2.0726  | C  | -4.5099  | -0.2803 | 4.3898  |
| H | -8.4287  | 2.8134 | 1.1261  | C  | -7.9059  | -0.6263 | 2.8955  |
| H | -8.7277  | 2.4636 | 2.8294  | C  | -5.2999  | 2.3060  | 8.4582  |
| C | -5.5821  | 4.5990 | 3.8697  | C  | -3.1448  | -0.7345 | 3.9380  |
| C | -5.1618  | 5.9501 | 5.8571  | C  | -8.4842  | -1.2408 | 1.6463  |
| H | -5.4740  | 6.2729 | 6.8472  | C  | -10.8276 | 1.7456  | 5.9313  |
| C | -5.9493  | 5.0389 | 5.1544  | H  | -5.4508  | 3.3881  | 8.4497  |
| H | -6.8389  | 4.6418 | 5.6230  | H  | -5.7010  | 1.8705  | 9.3765  |
| C | -7.4373  | 5.3011 | 1.4373  | H  | -4.2209  | 2.1095  | 8.4246  |
| C | -7.6942  | 5.0277 | 0.0889  | H  | -10.8467 | 2.7714  | 6.3127  |
| H | -8.1514  | 4.1028 | -0.2290 | H  | -11.3687 | 1.7350  | 4.9773  |
| C | -7.3600  | 5.9596 | -0.8847 | H  | -11.3217 | 1.0739  | 6.6355  |
| H | -7.5593  | 5.7526 | -1.9312 | H  | -7.8802  | -0.9386 | 0.7866  |
| C | -6.7611  | 7.1802 | -0.5363 | H  | -9.5020  | -0.8557 | 1.5052  |
| C | -6.5156  | 7.4579 | 0.8145  | H  | -8.5263  | -2.3290 | 1.7295  |
| C | -6.8579  | 6.5207 | 1.7904  | H  | -2.3802  | -0.1728 | 4.4878  |
| H | -6.6484  | 6.7639 | 2.8231  | H  | -3.0279  | -0.5068 | 2.8741  |
| C | -4.3788  | 5.0963 | 3.3292  | H  | -3.0072  | -1.8022 | 4.1198  |

|   |          |        |         |   |         |         |        |
|---|----------|--------|---------|---|---------|---------|--------|
| N | -14.6807 | 1.5558 | 0.1008  | H | -2.6158 | 8.4657  | 5.4840 |
| O | -14.6080 | 0.4163 | -0.3800 | C | -4.0386 | 7.0497  | 4.7147 |
| O | -15.7422 | 2.1900 | 0.1807  | H | -4.4064 | 7.7332  | 3.9578 |
| O | -6.4701  | 8.0136 | -1.5651 | C | -6.7746 | 7.1700  | 2.9069 |
| C | -5.8415  | 9.2629 | -1.2722 | C | -6.9414 | 8.4996  | 3.2752 |
| H | -5.6969  | 9.7550 | -2.2360 | H | -7.1797 | 8.7922  | 4.2894 |
| H | -6.4769  | 9.8916 | -0.6357 | C | -6.7857 | 9.5138  | 2.3245 |
| H | -4.8675  | 9.1166 | -0.7887 | H | -6.9182 | 10.5426 | 2.6360 |

**B\_-OAc-MeO-NO2**

**Energy (POTENTIAL) = -3094.69798022 Eh**

| Atom | X        | Y      | Z      |    |         |         |         |
|------|----------|--------|--------|----|---------|---------|---------|
| S    | -5.9849  | 2.8164 | 1.0881 | C  | -6.4415 | 6.8365  | 1.5887  |
| O    | -5.3459  | 3.9555 | 0.3771 | H  | -6.2809 | 5.8045  | 1.2940  |
| O    | -7.1590  | 2.1918 | 0.4547 | C  | -4.0454 | 4.8760  | 5.7815  |
| N    | -9.2312  | 6.0877 | 4.0283 | H  | -4.4666 | 3.8792  | 5.8667  |
| N    | -6.4283  | 3.3121 | 2.6012 | C  | -3.0142 | 5.2861  | 6.6283  |
| C    | -13.2325 | 5.7563 | 2.8919 | H  | -2.6204 | 4.5955  | 7.3695  |
| C    | -12.8676 | 6.6427 | 3.9122 | C  | -2.5024 | 6.5824  | 6.5322  |
| H    | -13.6261 | 7.2428 | 4.4000 | H  | -6.0331 | 7.5946  | -0.3800 |
| C    | -11.5412 | 6.7440 | 4.2922 | N  | -6.9227 | 6.0292  | 3.8858  |
| H    | -11.2727 | 7.4332 | 5.0841 | H  | -1.7053 | 6.9066  | 7.1958  |
| C    | -10.5434 | 5.9635 | 3.6537 | C  | -4.7005 | 1.5580  | 1.2499  |
| C    | -10.9400 | 5.0618 | 2.6315 | H  | -3.8526 | 1.9801  | 1.7947  |
| H    | -10.2147 | 4.4193 | 2.1473 | H  | -5.1161 | 0.7035  | 1.7820  |
| C    | -12.2679 | 4.9659 | 2.2549 | H  | -4.3913 | 1.2787  | 0.2388  |
| H    | -12.5662 | 4.2737 | 1.4770 | Rh | -7.0180 | 1.7212  | 4.1486  |
| C    | -8.7989  | 6.7815 | 5.2398 | Rh | -7.5575 | 0.0692  | 5.8605  |
| H    | -9.3045  | 6.3974 | 6.1343 | O  | -9.0573 | 2.0462  | 3.9382  |
| H    | -9.0018  | 7.8531 | 5.1620 | O  | -9.5614 | 0.4944  | 5.5185  |
| C    | -7.3033  | 6.4641 | 5.3027 | O  | -5.5070 | -0.2232 | 6.0853  |
| H    | -6.6726  | 7.2833 | 5.6344 | O  | -5.0174 | 1.3166  | 4.4903  |
| H    | -7.1086  | 5.5865 | 5.9131 | O  | -7.1062 | 0.1746  | 2.7779  |
| C    | -5.6383  | 5.2300 | 3.9211 | O  | -7.5998 | -1.3660 | 4.3685  |
| C    | -5.4614  | 4.0735 | 3.2501 | O  | -6.9782 | 3.1334  | 5.7002  |
| H    | -4.4453  | 3.6788 | 3.3156 | O  | -7.4665 | 1.5783  | 7.2773  |
| C    | -8.1812  | 5.2308 | 3.5297 | C  | -9.8726 | 1.3709  | 4.6503  |
| H    | -8.2262  | 5.0712 | 2.4594 | C  | -7.1894 | 2.7582  | 6.9039  |
| H    | -8.1272  | 4.2802 | 4.0535 | C  | -4.6993 | 0.4497  | 5.3719  |
| C    | -4.5697  | 5.7509 | 4.8100 | C  | -7.3730 | -1.0091 | 3.1699  |
| C    | -3.0187  | 7.4604 | 5.5742 | C  | -7.1070 | 3.8260  | 7.9684  |
|      |          |        |        | C  | -3.2211 | 0.2051  | 5.5558  |
|      |          |        |        | C  | -7.4513 | -2.0677 | 2.0976  |

|   |          |         |         |   |         |        |        |
|---|----------|---------|---------|---|---------|--------|--------|
| C | -11.3411 | 1.6227  | 4.4083  | H | -9.1866 | 5.5002 | 6.4476 |
| H | -6.1936  | 4.4134  | 7.8321  | H | -9.2879 | 7.1303 | 5.7568 |
| H | -7.9640  | 4.5025  | 7.8702  | C | -7.3226 | 6.1366 | 5.4875 |
| H | -7.1201  | 3.3811  | 8.9650  | H | -6.9324 | 7.0960 | 5.8344 |
| H | -11.5158 | 2.6834  | 4.2105  | H | -6.9112 | 5.3561 | 6.1201 |
| H | -11.6490 | 1.0623  | 3.5168  | C | -5.6034 | 5.0984 | 4.0719 |
| H | -11.9386 | 1.2868  | 5.2584  | C | -5.4323 | 3.9466 | 3.3835 |
| H | -6.6521  | -1.9244 | 1.3652  | H | -4.4098 | 3.5658 | 3.3576 |
| H | -8.4086  | -1.9639 | 1.5725  | C | -8.6871 | 4.5788 | 3.8954 |
| H | -7.3923  | -3.0670 | 2.5338  | H | -8.8015 | 4.2076 | 2.8883 |
| H | -2.6996  | 1.1611  | 5.6655  | H | -8.2142 | 3.9354 | 4.6185 |
| H | -2.8280  | -0.2863 | 4.6581  | C | -4.4887 | 5.6539 | 4.8759 |
| H | -3.0340  | -0.4276 | 6.4254  | C | -3.1633 | 7.5233 | 5.7007 |
| O | -6.2944  | 10.0885 | 0.0020  | H | -2.9708 | 8.5928 | 5.7291 |
| C | -6.4491  | 11.4777 | 0.2991  | C | -4.2255 | 7.0356 | 4.9395 |
| H | -6.2773  | 12.0029 | -0.6424 | H | -4.8449 | 7.7279 | 4.3779 |
| H | -7.4621  | 11.6987 | 0.6582  | C | -7.0496 | 6.8586 | 3.1261 |
| H | -5.7143  | 11.8119 | 1.0421  | C | -7.6350 | 8.0887 | 3.4395 |
| N | -14.6199 | 5.6480  | 2.5010  | H | -7.8728 | 8.3563 | 4.4610 |
| O | -14.9184 | 4.8531  | 1.5995  | C | -7.9514 | 9.0150 | 2.4385 |
| O | -15.4537 | 6.3556  | 3.0834  | H | -8.4242 | 9.9481 | 2.7210 |

**B-C-ts-OAc-MeO-NO2**

**Energy (POTENTIAL) = -3094.68186316 Eh**

| Atom | X        | Y      | Z      |    |         |         |         |
|------|----------|--------|--------|----|---------|---------|---------|
| S    | -6.1123  | 2.7059 | 1.2495 | H  | -6.2772 | 5.6415  | 1.5067  |
| O    | -5.5666  | 3.8616 | 0.4883 | C  | -3.6689 | 4.7815  | 5.6198  |
| O    | -7.3198  | 2.0527 | 0.7118 | H  | -3.8963 | 3.7191  | 5.6215  |
| N    | -9.4327  | 5.5747 | 4.3509 | C  | -2.5996 | 5.2723  | 6.3707  |
| N    | -6.4370  | 3.1704 | 2.8025 | H  | -1.9787 | 4.5816  | 6.9356  |
| C    | -12.0602 | 7.8902 | 2.0386 | C  | -2.3415 | 6.6451  | 6.4148  |
| C    | -12.2057 | 7.8600 | 3.4254 | H  | -6.8138 | 7.2797  | -0.2482 |
| H    | -12.9818 | 8.4424 | 3.9059 | N  | -6.8750 | 5.8184  | 4.1161  |
| C    | -11.3401 | 7.0739 | 4.1757 | H  | -1.5143 | 7.0285  | 7.0061  |
| H    | -11.4543 | 7.0359 | 5.2533 | C  | -4.7767 | 1.4890  | 1.2686  |
| C    | -10.3323 | 6.3329 | 3.5400 | H  | -3.9050 | 1.9242  | 1.7633  |
| C    | -10.2257 | 6.3440 | 2.1412 | H  | -5.1188 | 0.5988  | 1.7934  |
| H    | -9.4380  | 5.7997 | 1.6366 | H  | -4.5361 | 1.2621  | 0.2262  |
| C    | -11.0851 | 7.1309 | 1.3883 | Rh | -6.8483 | 1.4952  | 4.3171  |
| H    | -10.9836 | 7.1784 | 0.3114 | Rh | -7.2392 | -0.2002 | 6.0338  |
| C    | -8.8883  | 6.1302 | 5.6062 | O  | -8.9122 | 1.6928  | 4.1802  |
|      |          |        |        | O  | -9.2747 | 0.1278  | 5.7848  |

|   |          |         |         |   |          |         |         |
|---|----------|---------|---------|---|----------|---------|---------|
| O | -5.1724  | -0.4011 | 6.1592  | N | -9.7542  | 5.2269  | 4.2102  |
| O | -4.8164  | 1.1896  | 4.5787  | N | -7.2002  | 3.3119  | 3.1803  |
| O | -6.9079  | -0.0511 | 2.9423  | C | -11.3886 | 7.7039  | 1.2543  |
| O | -7.2871  | -1.6246 | 4.5321  | C | -11.9228 | 7.7491  | 2.5433  |
| O | -6.8241  | 2.8938  | 5.8781  | H | -12.7171 | 8.4449  | 2.7820  |
| O | -7.1583  | 1.3028  | 7.4591  | C | -11.4069 | 6.8951  | 3.5100  |
| C | -9.6631  | 0.9859  | 4.9313  | H | -11.8083 | 6.9144  | 4.5174  |
| C | -6.9609  | 2.4985  | 7.0864  | C | -10.3618 | 6.0254  | 3.1737  |
| C | -4.4251  | 0.3155  | 5.4225  | C | -9.8636  | 5.9578  | 1.8719  |
| C | -7.1136  | -1.2478 | 3.3307  | H | -9.0288  | 5.3131  | 1.6249  |
| C | -6.8791  | 3.5604  | 8.1571  | C | -10.3811 | 6.8088  | 0.9010  |
| C | -2.9339  | 0.1007  | 5.5180  | H | -9.9735  | 6.8100  | -0.1015 |
| C | -7.1781  | -2.2984 | 2.2492  | C | -9.3143  | 5.9077  | 5.4589  |
| C | -11.1496 | 1.1891  | 4.7636  | H | -9.7129  | 5.3508  | 6.3099  |
| H | -5.9569  | 4.1368  | 8.0310  | H | -9.7645  | 6.8958  | 5.4593  |
| H | -7.7240  | 4.2508  | 8.0542  | C | -7.7659  | 5.9774  | 5.5644  |
| H | -6.9028  | 3.1106  | 9.1512  | H | -7.5277  | 6.8081  | 6.2467  |
| H | -11.3773 | 2.2595  | 4.7405  | H | -7.4102  | 5.0570  | 6.0248  |
| H | -11.4587 | 0.7627  | 3.8019  | C | -5.9429  | 5.2302  | 4.0974  |
| H | -11.7050 | 0.7024  | 5.5676  | C | -6.0242  | 4.0350  | 3.4715  |
| H | -6.3653  | -2.1494 | 1.5325  | H | -5.0884  | 3.5098  | 3.2904  |
| H | -8.1246  | -2.1876 | 1.7068  | C | -9.4504  | 3.9768  | 4.0305  |
| H | -7.1257  | -3.3014 | 2.6772  | H | -9.7845  | 3.4523  | 3.1450  |
| H | -2.4065  | 1.0540  | 5.4247  | H | -9.0289  | 3.4291  | 4.8578  |
| H | -2.6196  | -0.5407 | 4.6853  | C | -4.6555  | 5.6867  | 4.6834  |
| H | -2.6707  | -0.3895 | 6.4576  | C | -3.1548  | 7.4710  | 5.3986  |
| N | -12.9360 | 8.7527  | 1.2489  | H | -2.9469  | 8.5338  | 5.4948  |
| O | -12.7244 | 8.8409  | 0.0364  | C | -4.3616  | 7.0556  | 4.8348  |
| O | -13.8393 | 9.3568  | 1.8338  | H | -5.0750  | 7.7994  | 4.4963  |
| O | -7.9730  | 9.5192  | 0.0449  | C | -7.2912  | 7.1668  | 3.4244  |
| C | -8.7120  | 10.7141 | 0.2924  | C | -8.0142  | 8.3031  | 3.8228  |
| H | -8.8688  | 11.1758 | -0.6847 | H | -8.3401  | 8.4191  | 4.8499  |
| H | -9.6859  | 10.4936 | 0.7489  | C | -8.3542  | 9.3104  | 2.9104  |
| H | -8.1547  | 11.4088 | 0.9340  | H | -8.9465  | 10.1493 | 3.2581  |

**C-OAc-MeO-NO2**

**Energy (POTENTIAL) = -3094.69245375 Eh**

| Atom | X       | Y      | Z      |
|------|---------|--------|--------|
| S    | -7.4238 | 2.9661 | 1.5735 |
| O    | -7.3414 | 4.2122 | 0.7677 |
| O    | -8.6781 | 2.1906 | 1.4751 |

|   |          |         |         |
|---|----------|---------|---------|
| N | -9.7542  | 5.2269  | 4.2102  |
| N | -7.2002  | 3.3119  | 3.1803  |
| C | -11.3886 | 7.7039  | 1.2543  |
| C | -11.9228 | 7.7491  | 2.5433  |
| H | -12.7171 | 8.4449  | 2.7820  |
| C | -11.4069 | 6.8951  | 3.5100  |
| H | -11.8083 | 6.9144  | 4.5174  |
| C | -10.3618 | 6.0254  | 3.1737  |
| C | -9.8636  | 5.9578  | 1.8719  |
| H | -9.0288  | 5.3131  | 1.6249  |
| C | -10.3811 | 6.8088  | 0.9010  |
| H | -9.9735  | 6.8100  | -0.1015 |
| C | -9.3143  | 5.9077  | 5.4589  |
| H | -9.7129  | 5.3508  | 6.3099  |
| H | -9.7645  | 6.8958  | 5.4593  |
| C | -7.7659  | 5.9774  | 5.5644  |
| H | -7.5277  | 6.8081  | 6.2467  |
| H | -7.4102  | 5.0570  | 6.0248  |
| C | -5.9429  | 5.2302  | 4.0974  |
| C | -6.0242  | 4.0350  | 3.4715  |
| H | -5.0884  | 3.5098  | 3.2904  |
| C | -9.4504  | 3.9768  | 4.0305  |
| H | -9.7845  | 3.4523  | 3.1450  |
| H | -9.0289  | 3.4291  | 4.8578  |
| C | -4.6555  | 5.6867  | 4.6834  |
| C | -3.1548  | 7.4710  | 5.3986  |
| H | -2.9469  | 8.5338  | 5.4948  |
| C | -4.3616  | 7.0556  | 4.8348  |
| H | -5.0750  | 7.7994  | 4.4963  |
| C | -7.2912  | 7.1668  | 3.4244  |
| C | -8.0142  | 8.3031  | 3.8228  |
| H | -8.3401  | 8.4191  | 4.8499  |
| C | -8.3542  | 9.3104  | 2.9104  |
| H | -8.9465  | 10.1493 | 3.2581  |
| C | -7.9426  | 9.2190  | 1.5792  |
| C | -7.1371  | 8.1338  | 1.1956  |
| C | -6.8166  | 7.1288  | 2.0945  |
| H | -6.2546  | 6.2689  | 1.7528  |
| C | -3.7117  | 4.7509  | 5.1577  |
| H | -3.9448  | 3.6916  | 5.1149  |
| C | -2.5032  | 5.1696  | 5.7145  |

|    |          |         |         |
|----|----------|---------|---------|
| H  | -1.7934  | 4.4286  | 6.0742  |
| C  | -2.2154  | 6.5322  | 5.8353  |
| H  | -6.8010  | 8.0748  | 0.1642  |
| N  | -7.0891  | 6.0710  | 4.2836  |
| H  | -1.2772  | 6.8588  | 6.2760  |
| C  | -6.0599  | 1.9300  | 1.0053  |
| H  | -5.1206  | 2.4680  | 1.1525  |
| H  | -6.0751  | 0.9927  | 1.5603  |
| H  | -6.2235  | 1.7557  | -0.0618 |
| Rh | -7.0026  | 1.4308  | 4.5871  |
| Rh | -6.6832  | -0.3096 | 6.2687  |
| O  | -9.0486  | 1.1982  | 4.8720  |
| O  | -8.7487  | -0.4092 | 6.4447  |
| O  | -4.6384  | -0.1030 | 5.9909  |
| O  | -4.9329  | 1.4871  | 4.4034  |
| O  | -7.0426  | -0.0944 | 3.1811  |
| O  | -6.7467  | -1.7103 | 4.7465  |
| O  | -6.9662  | 2.8087  | 6.1377  |
| O  | -6.6190  | 1.2010  | 7.6985  |
| C  | -9.4711  | 0.3397  | 5.7160  |
| C  | -6.7657  | 2.4076  | 7.3342  |
| C  | -4.2104  | 0.7326  | 5.1350  |
| C  | -6.9094  | -1.3076 | 3.5516  |
| C  | -6.6954  | 3.4835  | 8.3904  |
| C  | -2.7138  | 0.8575  | 4.9880  |
| C  | -6.9756  | -2.3501 | 2.4626  |
| C  | -10.9684 | 0.1868  | 5.8228  |
| H  | -5.8984  | 4.1882  | 8.1306  |
| H  | -7.6386  | 4.0403  | 8.4101  |
| H  | -6.5040  | 3.0527  | 9.3747  |
| H  | -11.4575 | 1.1600  | 5.7250  |
| H  | -11.3130 | -0.4477 | 4.9969  |
| H  | -11.2450 | -0.2856 | 6.7678  |
| H  | -6.3345  | -2.0565 | 1.6259  |
| H  | -8.0046  | -2.4069 | 2.0886  |
| H  | -6.6750  | -3.3288 | 2.8412  |
| H  | -2.3040  | 1.2995  | 5.9037  |
| H  | -2.4544  | 1.4871  | 4.1350  |
| H  | -2.2695  | -0.1359 | 4.8718  |
| N  | -11.8606 | 8.6668  | 0.2569  |
| O  | -12.6431 | 9.5469  | 0.6278  |

|   |          |         |         |
|---|----------|---------|---------|
| O | -11.4425 | 8.5616  | -0.8969 |
| O | -8.2649  | 10.1082 | 0.5904  |
| C | -9.1735  | 11.1566 | 0.9047  |
| H | -8.7519  | 11.8525 | 1.6433  |
| H | -9.3500  | 11.6930 | -0.0303 |
| H | -10.1300 | 10.7707 | 1.2828  |

**C-4-ts-OAc-MeO-NO2**

**Energy (POTENTIAL) = -3094.69038246 Eh**

| Atom | X        | Y      | Z       |
|------|----------|--------|---------|
| S    | -7.3804  | 3.1102 | 1.5310  |
| O    | -7.1125  | 4.3399 | 0.7510  |
| O    | -8.6559  | 2.4086 | 1.2938  |
| N    | -9.5935  | 5.2010 | 4.0758  |
| N    | -7.3261  | 3.4627 | 3.1992  |
| C    | -11.3675 | 7.6390 | 1.1596  |
| C    | -11.9150 | 7.6025 | 2.4443  |
| H    | -12.7645 | 8.2262 | 2.6927  |
| C    | -11.3494 | 6.7592 | 3.3902  |
| H    | -11.7741 | 6.7153 | 4.3872  |
| C    | -10.2300 | 5.9765 | 3.0579  |
| C    | -9.7280  | 5.9887 | 1.7530  |
| H    | -8.8446  | 5.4226 | 1.4944  |
| C    | -10.2944 | 6.8255 | 0.7988  |
| H    | -9.8756  | 6.8837 | -0.1977 |
| C    | -9.3130  | 5.8422 | 5.3800  |
| H    | -9.7252  | 5.2175 | 6.1782  |
| H    | -9.8404  | 6.7918 | 5.3954  |
| C    | -7.7954  | 6.0510 | 5.6225  |
| H    | -7.6762  | 6.8897 | 6.3243  |
| H    | -7.3910  | 5.1605 | 6.1027  |
| C    | -5.9612  | 5.3171 | 4.1767  |
| C    | -6.1271  | 4.1309 | 3.5581  |
| H    | -5.2303  | 3.5406 | 3.3961  |
| C    | -9.1758  | 3.9450 | 3.8745  |
| H    | -9.6286  | 3.3970 | 3.0600  |
| H    | -8.9557  | 3.4009 | 4.7784  |
| C    | -4.6320  | 5.6860 | 4.7345  |
| C    | -3.0076  | 7.3819 | 5.3873  |
| H    | -2.7332  | 8.4308 | 5.4665  |
| C    | -4.2535  | 7.0356 | 4.8641  |

|    |          |         |        |   |          |         |         |
|----|----------|---------|--------|---|----------|---------|---------|
| H  | -4.9324  | 7.8174  | 4.5402 | H | -7.5574  | 4.0494  | 8.4270  |
| C  | -7.2722  | 7.2906  | 3.5159 | H | -6.4463  | 3.0270  | 9.3856  |
| C  | -8.0968  | 8.3725  | 3.8687 | H | -11.4786 | 1.1288  | 5.8894  |
| H  | -8.4920  | 8.4571  | 4.8746 | H | -11.3523 | -0.5033 | 5.2108  |
| C  | -8.4584  | 9.3502  | 2.9343 | H | -11.2105 | -0.2800 | 6.9695  |
| H  | -9.1299  | 10.1432 | 3.2442 | H | -6.4760  | -2.0425 | 1.6130  |
| C  | -7.9724  | 9.2858  | 1.6262 | H | -8.1460  | -2.3675 | 2.0936  |
| C  | -7.0709  | 8.2627  | 1.2925 | H | -6.8217  | -3.3179 | 2.8231  |
| C  | -6.7264  | 7.2841  | 2.2129 | H | -2.3223  | 1.2875  | 5.7660  |
| H  | -6.0846  | 6.4685  | 1.9038 | H | -2.5481  | 1.5429  | 4.0129  |
| C  | -3.7339  | 4.6982  | 5.1886 | H | -2.3313  | -0.1064 | 4.6791  |
| H  | -4.0289  | 3.6542  | 5.1603 | N | -11.8923 | 8.5940  | 0.1891  |
| C  | -2.4876  | 5.0477  | 5.7089 | O | -12.7683 | 9.3817  | 0.5635  |
| H  | -1.8142  | 4.2677  | 6.0559 | O | -11.4249 | 8.5851  | -0.9524 |
| C  | -2.1148  | 6.3911  | 5.8070 | O | -8.3111  | 10.1444 | 0.6149  |
| H  | -6.6783  | 8.2247  | 0.2803 | C | -9.3252  | 11.1085 | 0.8689  |
| N  | -7.0346  | 6.2293  | 4.3998 | H | -9.0009  | 11.8538 | 1.6083  |
| H  | -1.1461  | 6.6639  | 6.2174 | H | -9.5121  | 11.6085 | -0.0842 |
| C  | -6.0225  | 1.9853  | 1.1686 | H | -10.2565 | 10.6439 | 1.2191  |
| H  | -5.0759  | 2.4522  | 1.4445 |   |          |         |         |
| H  | -6.1810  | 1.0462  | 1.6963 |   |          |         |         |
| H  | -6.0579  | 1.8354  | 0.0855 |   |          |         |         |
| Rh | -7.0722  | 1.4270  | 4.6131 |   |          |         |         |
| Rh | -6.6816  | -0.3136 | 6.2594 |   |          |         |         |
| O  | -9.1024  | 1.1845  | 4.9691 |   |          |         |         |
| O  | -8.7330  | -0.4312 | 6.5171 |   |          |         |         |
| O  | -4.6504  | -0.0952 | 5.9231 |   |          |         |         |
| O  | -5.0144  | 1.4962  | 4.3521 |   |          |         |         |
| O  | -7.1764  | -0.0825 | 3.1956 |   |          |         |         |
| O  | -6.7890  | -1.7044 | 4.7322 |   |          |         |         |
| O  | -6.9711  | 2.8015  | 6.1571 |   |          |         |         |
| O  | -6.5803  | 1.1859  | 7.6975 |   |          |         |         |
| C  | -9.4893  | 0.3204  | 5.8251 |   |          |         |         |
| C  | -6.7361  | 2.3959  | 7.3455 |   |          |         |         |
| C  | -4.2581  | 0.7463  | 5.0549 |   |          |         |         |
| C  | -7.0123  | -1.2985 | 3.5483 |   |          |         |         |
| C  | -6.6311  | 3.4655  | 8.4034 |   |          |         |         |
| C  | -2.7702  | 0.8813  | 4.8519 |   |          |         |         |
| C  | -7.1119  | -2.3321 | 2.4553 |   |          |         |         |
| C  | -10.9788 | 0.1627  | 5.9984 |   |          |         |         |
| H  | -5.8144  | 4.1467  | 8.1411 |   |          |         |         |

  

| <b>D-OAc-MeO-NO2</b>                          |          |        |         |
|-----------------------------------------------|----------|--------|---------|
| <b>Energy (POTENTIAL) = -3094.71966556 Eh</b> |          |        |         |
| Atom                                          | X        | Y      | Z       |
| S                                             | -6.9084  | 3.7190 | 0.8674  |
| O                                             | -5.6359  | 4.3535 | 0.5029  |
| O                                             | -8.0850  | 3.8512 | -0.0052 |
| N                                             | -9.3873  | 4.9605 | 3.6455  |
| N                                             | -7.3444  | 4.3446 | 2.3828  |
| C                                             | -11.6202 | 7.9491 | 1.7358  |
| C                                             | -11.7465 | 7.7575 | 3.1164  |
| H                                             | -12.4035 | 8.3981 | 3.6921  |
| C                                             | -11.0164 | 6.7604 | 3.7363  |
| H                                             | -11.1154 | 6.6330 | 4.8071  |
| C                                             | -10.1454 | 5.9222 | 2.9952  |
| C                                             | -10.0682 | 6.1122 | 1.5931  |
| H                                             | -9.3924  | 5.5204 | 0.9906  |
| C                                             | -10.7878 | 7.1194 | 0.9753  |
| H                                             | -10.6842 | 7.2891 | -0.0894 |
| C                                             | -9.0015  | 5.1407 | 5.0506  |
| H                                             | -8.4320  | 4.2578 | 5.3397  |
| H                                             | -9.8829  | 5.1770 | 5.7004  |



|    |         |         |         |   |          |         |         |
|----|---------|---------|---------|---|----------|---------|---------|
| C  | -8.1313 | 6.4018  | 5.2799  | O | -7.3197  | -0.2295 | 3.4447  |
| H  | -8.7564 | 7.2890  | 5.3493  | O | -6.4569  | -1.7330 | 4.9062  |
| H  | -7.6284 | 6.2936  | 6.2491  | O | -6.8166  | 2.7717  | 6.2387  |
| C  | -6.1653 | 5.5378  | 4.1676  | O | -6.1160  | 1.2481  | 7.7619  |
| C  | -6.2557 | 4.5201  | 3.2843  | C | -9.1521  | 0.0846  | 6.4030  |
| H  | -5.4486 | 3.7985  | 3.2126  | C | -6.4139  | 2.4333  | 7.4007  |
| C  | -8.6882 | 3.9471  | 2.9028  | C | -4.1797  | 0.8867  | 4.7303  |
| H  | -9.2838 | 3.6458  | 2.0424  | C | -6.9594  | -1.4061 | 3.7822  |
| H  | -8.5718 | 3.0786  | 3.5578  | C | -6.2426  | 3.5339  | 8.4133  |
| C  | -5.0592 | 5.6188  | 5.1566  | C | -2.7858  | 1.0843  | 4.1975  |
| C  | -3.7164 | 6.9648  | 6.6818  | C | -7.1834  | -2.5062 | 2.7780  |
| H  | -3.5058 | 7.9285  | 7.1384  | C | -10.5673 | -0.2050 | 6.8300  |
| C  | -4.7643 | 6.8512  | 5.7670  | H | -5.2232  | 3.9276  | 8.3249  |
| H  | -5.3591 | 7.7221  | 5.5116  | H | -6.9402  | 4.3499  | 8.2111  |
| C  | -7.3003 | 7.4958  | 3.1616  | H | -6.3832  | 3.1488  | 9.4258  |
| C  | -8.1899 | 8.5810  | 3.2480  | H | -11.2223 | 0.6369  | 6.5963  |
| H  | -8.7746 | 8.7513  | 4.1430  | H | -10.9200 | -1.0888 | 6.2840  |
| C  | -8.3825 | 9.4653  | 2.1824  | H | -10.6011 | -0.4305 | 7.8988  |
| H  | -9.1041 | 10.2659 | 2.2992  | H | -7.1009  | -2.1172 | 1.7604  |
| C  | -7.6655 | 9.3071  | 0.9938  | H | -8.1985  | -2.8993 | 2.9156  |
| C  | -6.7332 | 8.2650  | 0.9145  | H | -6.4729  | -3.3206 | 2.9358  |
| C  | -6.5500 | 7.3817  | 1.9719  | H | -2.0432  | 0.6853  | 4.8907  |
| H  | -5.8322 | 6.5814  | 1.8520  | H | -2.6036  | 2.1473  | 4.0142  |
| C  | -4.2811 | 4.4994  | 5.5085  | H | -2.7009  | 0.5604  | 3.2378  |
| H  | -4.5202 | 3.5298  | 5.0950  | N | -12.3163 | 9.0432  | 1.1021  |
| C  | -3.2278 | 4.6166  | 6.4136  | O | -13.0756 | 9.7407  | 1.7892  |
| H  | -2.6425 | 3.7364  | 6.6687  | O | -12.1200 | 9.2498  | -0.1058 |
| C  | -2.9402 | 5.8500  | 7.0088  | O | -7.7929  | 10.0986 | -0.1169 |
| H  | -6.1632 | 8.1398  | -0.0018 | C | -8.8652  | 11.0345 | -0.1458 |
| N  | -7.1331 | 6.5827  | 4.2300  | H | -8.7607  | 11.8033 | 0.6323  |
| H  | -2.1259 | 5.9380  | 7.7230  | H | -8.8171  | 11.5163 | -1.1254 |
| C  | -6.6129 | 1.9661  | 1.1392  | H | -9.8383  | 10.5363 | -0.0361 |
| H  | -5.7950 | 1.8444  | 1.8520  |   |          |         |         |
| H  | -7.5270 | 1.5052  | 1.5191  |   |          |         |         |
| H  | -6.3429 | 1.5267  | 0.1745  |   |          |         |         |
| Rh | -7.0725 | 1.3166  | 4.7949  |   |          |         |         |
| Rh | -6.2615 | -0.2916 | 6.3823  |   |          |         |         |
| O  | -8.9806 | 0.9761  | 5.5073  |   |          |         |         |
| O  | -8.2290 | -0.6044 | 6.9463  |   |          |         |         |
| O  | -4.3398 | 0.1022  | 5.7171  |   |          |         |         |
| O  | -5.1153 | 1.5253  | 4.1359  |   |          |         |         |

  

| <b>4-MeO-NO2</b>                              |         |        |         |
|-----------------------------------------------|---------|--------|---------|
| <b>Energy (POTENTIAL) = -1961.52129144 Eh</b> |         |        |         |
| Atom                                          | X       | Y      | Z       |
| S                                             | -6.3626 | 1.6660 | -0.4658 |
| O                                             | -7.2444 | 1.1597 | -1.5275 |
| O                                             | -5.5814 | 0.7242 | 0.3442  |
| N                                             | -9.6564 | 3.2056 | 1.0076  |
| N                                             | -7.3275 | 2.5840 | 0.5868  |

|   |          |         |         |   |          |         |         |
|---|----------|---------|---------|---|----------|---------|---------|
| C | -11.0266 | -0.3768 | 2.7006  | H | -3.9563  | 6.3019  | 0.1742  |
| C | -11.3646 | 0.8444  | 3.2939  | N | -7.7739  | 4.9299  | 2.3127  |
| H | -11.9695 | 0.8569  | 4.1924  | H | -6.0608  | 3.3919  | 8.0202  |
| C | -10.9099 | 2.0279  | 2.7400  | C | -5.2400  | 2.8711  | -1.1807 |
| H | -11.1640 | 2.9562  | 3.2349  | H | -5.8265  | 3.6370  | -1.6929 |
| C | -10.1070 | 2.0279  | 1.5694  | H | -4.6503  | 3.3115  | -0.3748 |
| C | -9.7743  | 0.7725  | 0.9936  | H | -4.5952  | 2.3420  | -1.8881 |
| H | -9.1665  | 0.7169  | 0.1000  | N | -11.4890 | -1.6126 | 3.2896  |
| C | -10.2299 | -0.4091 | 1.5503  | O | -11.1610 | -2.6808 | 2.7547  |
| H | -9.9753  | -1.3599 | 1.0977  | O | -12.1946 | -1.5541 | 4.3066  |
| C | -10.0886 | 4.5239  | 1.4851  | O | -5.0800  | 8.4497  | -1.1364 |
| H | -11.1278 | 4.4714  | 1.8174  | C | -3.6999  | 8.2769  | -1.4372 |
| H | -10.0733 | 5.1941  | 0.6221  | H | -3.5085  | 7.3089  | -1.9206 |
| C | -9.1955  | 5.0867  | 2.6074  | H | -3.4395  | 9.0807  | -2.1298 |
| H | -9.4442  | 6.1384  | 2.7856  | H | -3.0743  | 8.3606  | -0.5383 |
| H | -9.3893  | 4.5489  | 3.5392  |   |          |         |         |
| C | -7.1890  | 3.7099  | 2.7617  |   |          |         |         |
| C | -6.9192  | 2.6839  | 1.9235  |   |          |         |         |
| H | -6.3638  | 1.8258  | 2.2822  |   |          |         |         |
| C | -8.5765  | 3.1970  | 0.0457  |   |          |         |         |
| H | -8.3852  | 4.2272  | -0.2524 |   |          |         |         |
| H | -8.8344  | 2.6188  | -0.8425 |   |          |         |         |
| C | -6.8991  | 3.6050  | 4.2106  |   |          |         |         |
| C | -6.2818  | 4.6861  | 6.3039  |   |          |         |         |
| H | -6.0338  | 5.5916  | 6.8520  |   |          |         |         |
| C | -6.5844  | 4.7637  | 4.9449  |   |          |         |         |
| H | -6.5678  | 5.7232  | 4.4368  |   |          |         |         |
| C | -7.0868  | 5.7938  | 1.4436  |   |          |         |         |
| C | -7.7301  | 6.8833  | 0.8151  |   |          |         |         |
| H | -8.7835  | 7.0769  | 0.9798  |   |          |         |         |
| C | -7.0299  | 7.7431  | -0.0264 |   |          |         |         |
| H | -7.5403  | 8.5757  | -0.5022 |   |          |         |         |
| C | -5.6668  | 7.5535  | -0.2837 |   |          |         |         |
| C | -5.0134  | 6.4816  | 0.3359  |   |          |         |         |
| C | -5.7141  | 5.6224  | 1.1848  |   |          |         |         |
| H | -5.1785  | 4.8073  | 1.6576  |   |          |         |         |
| C | -6.9362  | 2.3717  | 4.8886  |   |          |         |         |
| H | -7.2400  | 1.4750  | 4.3562  |   |          |         |         |
| C | -6.6233  | 2.2956  | 6.2460  |   |          |         |         |
| H | -6.6588  | 1.3338  | 6.7512  |   |          |         |         |
| C | -6.2935  | 3.4512  | 6.9602  |   |          |         |         |

**2\_MeO-NO2**

**Energy (POTENTIAL) = -1009.79516639 Eh**

| Atom | X        | Y      | Z       |
|------|----------|--------|---------|
| N    | -10.1116 | 3.6662 | 2.2621  |
| C    | -13.1056 | 2.4386 | -0.4759 |
| C    | -13.4080 | 3.3470 | 0.5438  |
| H    | -14.4094 | 3.7466 | 0.6571  |
| C    | -12.4148 | 3.7653 | 1.4353  |
| H    | -12.6863 | 4.4757 | 2.2085  |
| C    | -11.0979 | 3.2830 | 1.3436  |
| C    | -10.8076 | 2.3668 | 0.3083  |
| H    | -9.8072  | 1.9619 | 0.1968  |
| C    | -11.7937 | 1.9552 | -0.5806 |
| H    | -11.5583 | 1.2515 | -1.3740 |
| C    | -10.2949 | 4.8522 | 3.0963  |
| H    | -11.1303 | 4.7217 | 3.7887  |
| H    | -10.4820 | 5.7540 | 2.4906  |
| C    | -8.9630  | 4.9517 | 3.8378  |
| H    | -8.6990  | 5.9896 | 4.0608  |
| H    | -8.9768  | 4.3838 | 4.7776  |
| C    | -8.7136  | 3.5866 | 1.8620  |
| H    | -8.5356  | 4.0157 | 0.8599  |
| H    | -8.3646  | 2.5457 | 1.8497  |
| C    | -6.6712  | 4.3639 | 3.0284  |
| C    | -6.0529  | 4.9997 | 4.1411  |

|   |          |        |         |
|---|----------|--------|---------|
| H | -6.6595  | 5.4759 | 4.9021  |
| C | -4.6779  | 5.0100 | 4.2753  |
| H | -4.2131  | 5.4919 | 5.1271  |
| C | -3.8752  | 4.3868 | 3.3090  |
| C | -4.4590  | 3.7519 | 2.2035  |
| C | -5.8334  | 3.7381 | 2.0624  |
| H | -6.2667  | 3.2522 | 1.1959  |
| H | -3.8269  | 3.2770 | 1.4629  |
| N | -8.0227  | 4.3590 | 2.8873  |
| N | -2.4418  | 4.3999 | 3.4524  |
| O | -1.7540  | 3.8393 | 2.5854  |
| O | -1.9495  | 4.9719 | 4.4372  |
| O | -13.9957 | 1.9719 | -1.4051 |
| C | -15.3352 | 2.4493 | -1.3428 |
| H | -15.3837 | 3.5392 | -1.4716 |
| H | -15.8654 | 1.9675 | -2.1676 |
| H | -15.8199 | 2.1748 | -0.3959 |

#### D\_-OAc-MeO-NO2

Energy (POTENTIAL) = -3094.71504116 Eh

| Atom | X        | Y      | Z      |
|------|----------|--------|--------|
| S    | -8.6067  | 4.9495 | 2.0324 |
| O    | -8.9118  | 6.3802 | 2.1171 |
| O    | -9.7236  | 4.0075 | 1.9583 |
| N    | -9.2106  | 6.8049 | 5.1228 |
| N    | -7.5955  | 4.3281 | 3.3321 |
| C    | -12.5178 | 4.2508 | 4.8409 |
| C    | -12.6194 | 5.5829 | 4.4183 |
| H    | -13.5579 | 5.9486 | 4.0195 |
| C    | -11.5287 | 6.4260 | 4.5222 |
| H    | -11.6355 | 7.4561 | 4.2063 |
| C    | -10.2909 | 5.9616 | 5.0447 |
| C    | -10.2205 | 4.6064 | 5.4700 |
| H    | -9.2936  | 4.1736 | 5.8203 |
| C    | -11.3114 | 3.7683 | 5.3664 |
| H    | -11.2246 | 2.7315 | 5.6642 |
| C    | -9.1791  | 8.1139 | 4.4568 |
| H    | -9.6889  | 8.8762 | 5.0633 |
| H    | -9.6846  | 8.0283 | 3.4967 |
| C    | -7.7137  | 8.5340 | 4.2273 |
| H    | -7.6866  | 9.3102 | 3.4650 |

|    |         |         |         |
|----|---------|---------|---------|
| H  | -7.3007 | 8.9862  | 5.1395  |
| C  | -6.7721 | 6.3423  | 4.7991  |
| C  | -6.9018 | 4.9297  | 4.2308  |
| H  | -6.3252 | 4.2200  | 4.8166  |
| C  | -7.9878 | 6.4789  | 5.8062  |
| H  | -8.0807 | 5.5716  | 6.3970  |
| H  | -7.7310 | 7.2780  | 6.5093  |
| C  | -5.5049 | 6.4121  | 5.6917  |
| C  | -3.5535 | 7.6332  | 6.4726  |
| H  | -2.9021 | 8.4995  | 6.3946  |
| C  | -4.6561 | 7.5232  | 5.6219  |
| H  | -4.8497 | 8.2996  | 4.8899  |
| C  | -6.1298 | 7.3829  | 2.6338  |
| C  | -6.5012 | 8.1508  | 1.5154  |
| H  | -7.3958 | 8.7607  | 1.5488  |
| C  | -5.7756 | 8.1150  | 0.3239  |
| H  | -6.1123 | 8.7245  | -0.5071 |
| C  | -4.6549 | 7.2835  | 0.2010  |
| C  | -4.2814 | 6.4994  | 1.2986  |
| C  | -4.9969 | 6.5518  | 2.4924  |
| H  | -4.6497 | 5.9395  | 3.3158  |
| C  | -5.2417 | 5.4256  | 6.6572  |
| H  | -5.8973 | 4.5655  | 6.7654  |
| C  | -4.1381 | 5.5341  | 7.5056  |
| H  | -3.9509 | 4.7561  | 8.2408  |
| C  | -3.2868 | 6.6377  | 7.4147  |
| H  | -3.4142 | 5.8514  | 1.2106  |
| N  | -6.8777 | 7.4076  | 3.8235  |
| H  | -2.4273 | 6.7219  | 8.0740  |
| C  | -7.4770 | 4.6438  | 0.6752  |
| H  | -6.5798 | 5.2486  | 0.8075  |
| H  | -7.2457 | 3.5767  | 0.6663  |
| H  | -8.0096 | 4.9388  | -0.2336 |
| Rh | -7.4687 | 2.0404  | 3.6402  |
| Rh | -7.0659 | -0.2823 | 4.2146  |
| O  | -9.4799 | 1.5547  | 3.5336  |
| O  | -9.0914 | -0.6254 | 4.0277  |
| O  | -5.0470 | 0.2031  | 4.3881  |
| O  | -5.4297 | 2.3626  | 3.8194  |
| O  | -7.2126 | 1.5312  | 1.6546  |
| O  | -6.8203 | -0.6387 | 2.1832  |

|   |          |         |         |   |          |        |         |
|---|----------|---------|---------|---|----------|--------|---------|
| O | -7.6709  | 2.4201  | 5.6703  | H | -13.5600 | 6.4144 | 3.8658  |
| O | -7.3382  | 0.2427  | 6.2055  | C | -11.5026 | 6.5936 | 4.4776  |
| C | -9.8506  | 0.3530  | 3.7237  | H | -11.5168 | 7.6758 | 4.4348  |
| C | -7.5609  | 1.4567  | 6.5029  | C | -10.3434 | 5.9019 | 4.8639  |
| C | -4.6727  | 1.3972  | 4.1748  | C | -10.3518 | 4.5009 | 4.9393  |
| C | -6.9482  | 0.3177  | 1.3570  | H | -9.4567  | 3.9389 | 5.1722  |
| C | -7.6686  | 1.8063  | 7.9659  | C | -11.5047 | 3.7997 | 4.6279  |
| C | -3.2085  | 1.7241  | 4.3308  | H | -11.4950 | 2.7205 | 4.6452  |
| C | -6.7952  | 0.0087  | -0.1111 | C | -8.9422  | 7.9821 | 4.5699  |
| C | -11.3196 | 0.0645  | 3.5415  | H | -9.4334  | 8.7589 | 5.1670  |
| H | -6.6570  | 1.9505  | 8.3654  | H | -9.4005  | 7.9315 | 3.5857  |
| H | -8.2343  | 2.7307  | 8.1031  | C | -7.4435  | 8.2946 | 4.4195  |
| H | -8.1377  | 0.9885  | 8.5185  | H | -7.3730  | 9.2114 | 3.8302  |
| H | -11.9226 | 0.8391  | 4.0236  | H | -7.0063  | 8.5344 | 5.3977  |
| H | -11.5478 | 0.0843  | 2.4688  | C | -6.3068  | 6.1185 | 4.5727  |
| H | -11.5755 | -0.9187 | 3.9421  | C | -6.6678  | 4.8005 | 4.2528  |
| H | -6.1116  | 0.7290  | -0.5711 | H | -6.1627  | 4.0825 | 4.8869  |
| H | -7.7709  | 0.1156  | -0.5996 | C | -8.2573  | 6.1795 | 6.0265  |
| H | -6.4256  | -1.0076 | -0.2595 | H | -8.3752  | 5.1936 | 6.4560  |
| H | -3.0975  | 2.6545  | 4.8965  | H | -7.5882  | 6.8675 | 6.5210  |
| H | -2.7722  | 1.8827  | 3.3374  | C | -5.2685  | 6.3117 | 5.6260  |
| H | -2.6780  | 0.9115  | 4.8306  | C | -3.4485  | 7.6436 | 6.5636  |
| O | -3.8806  | 7.1667  | -0.9205 | H | -2.8032  | 8.5159 | 6.4977  |
| C | -4.2436  | 7.9346  | -2.0628 | C | -4.4225  | 7.4363 | 5.5846  |
| H | -4.2064  | 9.0127  | -1.8559 | H | -4.5173  | 8.1426 | 4.7661  |
| H | -3.5089  | 7.6926  | -2.8341 | C | -6.0749  | 7.4262 | 2.5099  |
| H | -5.2461  | 7.6714  | -2.4263 | C | -6.6965  | 8.1925 | 1.5123  |
| N | -13.6552 | 3.3775  | 4.7356  | H | -7.6672  | 8.6372 | 1.6999  |
| O | -13.5496 | 2.2096  | 5.1494  | C | -6.1185  | 8.3519 | 0.2506  |
| O | -14.7037 | 3.8197  | 4.2429  | H | -6.6413  | 8.9449 | -0.4913 |

**C-D-ts-OAc-MeO-NO2**

**Energy (POTENTIAL) = -3094.68077324 Eh**

| Atom | X        | Y      | Z       |
|------|----------|--------|---------|
| S    | -8.3697  | 4.7232 | 2.1024  |
| O    | -8.7611  | 6.1396 | 2.2286  |
| O    | -9.4562  | 3.7572 | 1.8914  |
| N    | -9.1785  | 6.6517 | 5.2093  |
| N    | -7.4750  | 4.1451 | 3.4051  |
| C    | -12.6488 | 4.4991 | 4.2426  |
| C    | -12.6594 | 5.8917 | 4.1629  |
| H    | -13.5600 | 6.4144 | 3.8658  |
| C    | -11.5026 | 6.5936 | 4.4776  |
| H    | -11.5168 | 7.6758 | 4.4348  |
| C    | -10.3434 | 5.9019 | 4.8639  |
| C    | -10.3518 | 4.5009 | 4.9393  |
| H    | -9.4567  | 3.9389 | 5.1722  |
| C    | -11.5047 | 3.7997 | 4.6279  |
| H    | -11.4950 | 2.7205 | 4.6452  |
| C    | -8.9422  | 7.9821 | 4.5699  |
| H    | -9.4334  | 8.7589 | 5.1670  |
| H    | -9.4005  | 7.9315 | 3.5857  |
| C    | -7.4435  | 8.2946 | 4.4195  |
| H    | -7.3730  | 9.2114 | 3.8302  |
| H    | -7.0063  | 8.5344 | 5.3977  |
| C    | -6.3068  | 6.1185 | 4.5727  |
| C    | -6.6678  | 4.8005 | 4.2528  |
| H    | -6.1627  | 4.0825 | 4.8869  |
| C    | -8.2573  | 6.1795 | 6.0265  |
| H    | -8.3752  | 5.1936 | 6.4560  |
| H    | -7.5882  | 6.8675 | 6.5210  |
| C    | -5.2685  | 6.3117 | 5.6260  |
| C    | -3.4485  | 7.6436 | 6.5636  |
| H    | -2.8032  | 8.5159 | 6.4977  |
| C    | -4.4225  | 7.4363 | 5.5846  |
| H    | -4.5173  | 8.1426 | 4.7661  |
| C    | -6.0749  | 7.4262 | 2.5099  |
| C    | -6.6965  | 8.1925 | 1.5123  |
| H    | -7.6672  | 8.6372 | 1.6999  |
| C    | -6.1185  | 8.3519 | 0.2506  |
| H    | -6.6413  | 8.9449 | -0.4913 |
| C    | -4.9031  | 7.7260 | -0.0534 |
| C    | -4.2736  | 6.9559 | 0.9343  |
| C    | -4.8437  | 6.8150 | 2.1957  |
| H    | -4.3317  | 6.2176 | 2.9426  |
| C    | -5.1260  | 5.4248 | 6.7164  |
| H    | -5.7964  | 4.5750 | 6.8164  |
| C    | -4.1464  | 5.6285 | 7.6861  |
| H    | -4.0568  | 4.9243 | 8.5094  |
| C    | -3.2976  | 6.7385 | 7.6162  |
| H    | -3.3281  | 6.4748 | 0.7004  |
| N    | -6.6600  | 7.2458 | 3.7790  |



|    |          |         |         |   |          |         |         |
|----|----------|---------|---------|---|----------|---------|---------|
| C  | -6.0894  | 4.5612  | -1.4854 | H | -10.6182 | 2.5216  | 7.0081  |
| H  | -5.9303  | 3.8247  | -2.2660 | H | -8.9179  | 0.5540  | 0.0442  |
| C  | -5.2938  | 5.7153  | -1.4749 | H | -9.8070  | -0.8742 | 0.6716  |
| C  | -5.4722  | 6.6466  | -0.4457 | H | -8.1024  | -1.0142 | 0.2030  |
| C  | -6.4347  | 6.4302  | 0.5442  | H | -3.1160  | -0.9936 | 3.6288  |
| H  | -6.5352  | 7.1651  | 1.3342  | H | -4.0483  | -1.9058 | 2.4236  |
| C  | -5.2327  | 5.5974  | 3.4631  | H | -3.9217  | -2.5304 | 4.0809  |
| H  | -4.7288  | 5.4400  | 2.5181  | N | -14.5377 | 1.0093  | 3.6190  |
| C  | -5.1116  | 6.8149  | 4.1162  | O | -14.4654 | -0.1933 | 3.3257  |
| H  | -4.5141  | 7.6079  | 3.6766  | O | -15.5209 | 1.5074  | 4.1879  |
| C  | -5.7661  | 7.0215  | 5.3378  | O | -4.3928  | 5.8348  | -2.4954 |
| H  | -4.8694  | 7.5463  | -0.3958 | C | -3.5325  | 6.9680  | -2.4951 |
| N  | -8.1838  | 5.0503  | 1.5414  | H | -2.8976  | 6.8632  | -3.3778 |
| H  | -5.6706  | 7.9779  | 5.8445  | H | -4.0979  | 7.9071  | -2.5686 |
| C  | -2.5984  | 0.9658  | 1.1206  | H | -2.9001  | 6.9950  | -1.5974 |
| H  | -1.8721  | 1.3272  | 1.8513  |   |          |         |         |
| H  | -3.2796  | 0.2450  | 1.5725  |   |          |         |         |
| H  | -2.0923  | 0.5331  | 0.2531  |   |          |         |         |
| Rh | -6.9330  | 1.5367  | 4.0658  |   |          |         |         |
| Rh | -7.9557  | -0.5532 | 4.8956  |   |          |         |         |
| O  | -8.6643  | 2.4895  | 4.6896  |   |          |         |         |
| O  | -9.6160  | 0.5683  | 5.4372  |   |          |         |         |
| O  | -6.2024  | -1.5213 | 4.3619  |   |          |         |         |
| O  | -5.2603  | 0.3899  | 3.5746  |   |          |         |         |
| O  | -7.7506  | 1.0687  | 2.2098  |   |          |         |         |
| O  | -8.6880  | -0.8531 | 2.9717  |   |          |         |         |
| O  | -6.1698  | 1.8063  | 5.9690  |   |          |         |         |
| O  | -7.1234  | -0.1043 | 6.7472  |   |          |         |         |
| C  | -9.5782  | 1.8264  | 5.2915  |   |          |         |         |
| C  | -6.4308  | 0.9478  | 6.8831  |   |          |         |         |
| C  | -5.2533  | -0.8613 | 3.8430  |   |          |         |         |
| C  | -8.4045  | -0.0235 | 2.0596  |   |          |         |         |
| C  | -5.8319  | 1.2370  | 8.2378  |   |          |         |         |
| C  | -3.9988  | -1.6205 | 3.4815  |   |          |         |         |
| C  | -8.8489  | -0.3489 | 0.6545  |   |          |         |         |
| C  | -10.6955 | 2.6210  | 5.9189  |   |          |         |         |
| H  | -6.0572  | 2.2680  | 8.5282  |   |          |         |         |
| H  | -6.2150  | 0.5424  | 8.9876  |   |          |         |         |
| H  | -4.7419  | 1.1405  | 8.1742  |   |          |         |         |
| H  | -10.6359 | 3.6741  | 5.6442  |   |          |         |         |
| H  | -11.6597 | 2.2088  | 5.6118  |   |          |         |         |

  

| <b>t-A-B-ts-OAc-MeO-NO2</b>                   |          |        |         |
|-----------------------------------------------|----------|--------|---------|
| <b>Energy (POTENTIAL) = -3094.67098145 Eh</b> |          |        |         |
| Atom                                          | X        | Y      | Z       |
| S                                             | -4.2023  | 1.6442 | 0.2083  |
| O                                             | -3.0221  | 2.2046 | -0.4685 |
| O                                             | -5.4677  | 1.5433 | -0.5542 |
| N                                             | -10.1617 | 3.9968 | 2.1040  |
| N                                             | -4.3919  | 2.5385 | 1.6590  |
| C                                             | -13.6381 | 1.7651 | 1.5426  |
| C                                             | -13.7136 | 3.0337 | 2.1362  |
| H                                             | -14.6756 | 3.4226 | 2.4476  |
| C                                             | -12.5656 | 3.7809 | 2.3154  |
| H                                             | -12.6409 | 4.7667 | 2.7595  |
| C                                             | -11.2980 | 3.2765 | 1.9121  |
| C                                             | -11.2500 | 1.9903 | 1.3019  |
| H                                             | -10.3043 | 1.5695 | 0.9806  |
| C                                             | -12.4035 | 1.2497 | 1.1242  |
| H                                             | -12.3594 | 0.2680 | 0.6679  |
| C                                             | -10.0368 | 5.1773 | 2.9593  |
| H                                             | -10.7099 | 5.1201 | 3.8192  |
| H                                             | -10.2468 | 6.0976 | 2.4005  |
| C                                             | -8.5746  | 5.0849 | 3.3957  |
| H                                             | -8.1426  | 6.0324 | 3.6973  |
| H                                             | -8.4797  | 4.3766 | 4.2153  |
| C                                             | -6.0370  | 3.3336 | 3.2295  |

|    |         |         |         |   |          |         |         |
|----|---------|---------|---------|---|----------|---------|---------|
| C  | -5.6260 | 2.8053  | 1.9471  | C | -9.5483  | 1.4376  | 5.1503  |
| H  | -6.4230 | 2.4820  | 1.2810  | C | -6.3604  | 1.4340  | 7.1439  |
| C  | -8.8403 | 3.4709  | 1.7425  | C | -4.6519  | -0.4664 | 4.4423  |
| H  | -8.7631 | 3.3241  | 0.6659  | C | -7.8255  | -0.4976 | 2.4241  |
| H  | -8.6534 | 2.5258  | 2.2498  | C | -5.9332  | 2.0025  | 8.4758  |
| C  | -5.4674 | 4.5254  | 3.7996  | C | -3.2572  | -1.0100 | 4.2423  |
| C  | -5.3085 | 6.1117  | 5.6460  | C | -8.2493  | -1.0163 | 1.0719  |
| H  | -5.5921 | 6.4179  | 6.6490  | C | -10.9524 | 1.9744  | 5.2828  |
| C  | -5.8261 | 4.9411  | 5.1079  | H | -6.4432  | 2.9570  | 8.6452  |
| H  | -6.5037 | 4.3266  | 5.6838  | H | -6.1633  | 1.3107  | 9.2881  |
| C  | -7.3201 | 5.3691  | 1.2436  | H | -4.8564  | 2.2028  | 8.4546  |
| C  | -6.9297 | 4.8729  | -0.0209 | H | -10.9382 | 3.0530  | 5.4574  |
| H  | -7.0979 | 3.8395  | -0.2970 | H | -11.4857 | 1.7880  | 4.3435  |
| C  | -6.2874 | 5.6836  | -0.9432 | H | -11.4827 | 1.4656  | 6.0909  |
| H  | -5.9886 | 5.2846  | -1.9075 | H | -7.7034  | -0.4998 | 0.2787  |
| C  | -6.0006 | 7.0257  | -0.6449 | H | -9.3216  | -0.8230 | 0.9422  |
| C  | -6.3684 | 7.5298  | 0.6060  | H | -8.0880  | -2.0952 | 1.0095  |
| C  | -7.0079 | 6.7055  | 1.5360  | H | -2.5597  | -0.2106 | 3.9863  |
| H  | -7.2528 | 7.1423  | 2.4947  | H | -3.2755  | -1.7448 | 3.4287  |
| C  | -4.5848 | 5.3497  | 3.0510  | H | -2.9273  | -1.5240 | 5.1496  |
| H  | -4.3144 | 5.0672  | 2.0412  | N | -14.8372 | 0.9865  | 1.3626  |
| C  | -4.0520 | 6.5085  | 3.6072  | O | -14.7435 | -0.1330 | 0.8369  |
| H  | -3.3702 | 7.1211  | 3.0246  | O | -15.9168 | 1.4658  | 1.7411  |
| C  | -4.4140 | 6.8932  | 4.9013  | O | -5.3712  | 7.7326  | -1.6198 |
| H  | -6.1583 | 8.5565  | 0.8817  | C | -5.0097  | 9.0855  | -1.3459 |
| N  | -7.8833 | 4.4865  | 2.2244  | H | -4.5048  | 9.4470  | -2.2439 |
| H  | -4.0039 | 7.8035  | 5.3307  | H | -5.8933  | 9.7072  | -1.1520 |
| C  | -3.8101 | 0.0191  | 0.8616  | H | -4.3231  | 9.1509  | -0.4921 |
| H  | -2.9184 | 0.0998  | 1.4841  |   |          |         |         |
| H  | -4.6646 | -0.3282 | 1.4445  |   |          |         |         |
| H  | -3.6264 | -0.6375 | 0.0064  |   |          |         |         |
| Rh | -6.7511 | 1.5637  | 4.2392  |   |          |         |         |
| Rh | -7.4322 | -0.5581 | 5.3144  |   |          |         |         |
| O  | -8.6873 | 2.2275  | 4.6298  |   |          |         |         |
| O  | -9.3344 | 0.2480  | 5.5291  |   |          |         |         |
| O  | -5.4872 | -1.2193 | 5.0297  |   |          |         |         |
| O  | -4.8828 | 0.7016  | 3.9803  |   |          |         |         |
| O  | -7.3986 | 0.7077  | 2.4525  |   |          |         |         |
| O  | -7.9420 | -1.2670 | 3.4222  |   |          |         |         |
| O  | -6.1504 | 2.1812  | 6.1291  |   |          |         |         |
| O  | -6.8836 | 0.2792  | 7.1288  |   |          |         |         |

  

|                                               |  |          |  |        |  |         |  |
|-----------------------------------------------|--|----------|--|--------|--|---------|--|
| <b>t-B-OAc-MeO-NO2</b>                        |  |          |  |        |  |         |  |
| <b>Energy (POTENTIAL) = -3094.68807736 Eh</b> |  |          |  |        |  |         |  |
| Atom                                          |  | X        |  | Y      |  | Z       |  |
| S                                             |  | -4.5209  |  | 0.9676 |  | 0.2423  |  |
| O                                             |  | -3.4012  |  | 1.3869 |  | -0.6232 |  |
| O                                             |  | -5.7822  |  | 0.5700 |  | -0.4298 |  |
| N                                             |  | -9.9552  |  | 4.0352 |  | 2.2394  |  |
| N                                             |  | -4.7310  |  | 2.1688 |  | 1.3901  |  |
| C                                             |  | -13.7240 |  | 2.6042 |  | 1.1723  |  |
| C                                             |  | -13.6159 |  | 3.7040 |  | 2.0331  |  |
| H                                             |  | -14.5120 |  | 4.1774 |  | 2.4152  |  |
| C                                             |  | -12.3667 |  | 4.1805 |  | 2.3861  |  |

|   |          |         |         |    |          |         |         |
|---|----------|---------|---------|----|----------|---------|---------|
| H | -12.2969 | 5.0407  | 3.0415  | H  | -3.0346  | -0.1062 | 1.7557  |
| C | -11.1894 | 3.5649  | 1.8865  | H  | -4.7333  | -0.6327 | 1.9865  |
| C | -11.3255 | 2.4509  | 1.0162  | H  | -3.7807  | -1.2540 | 0.5927  |
| H | -10.4502 | 1.9469  | 0.6235  | Rh | -6.8592  | 1.4392  | 4.1640  |
| C | -12.5783 | 1.9809  | 0.6637  | Rh | -7.1828  | -0.5592 | 5.5450  |
| H | -12.6780 | 1.1284  | 0.0029  | O  | -8.9404  | 1.6617  | 4.2259  |
| C | -9.7130  | 4.9661  | 3.3415  | O  | -9.2251  | -0.1773 | 5.5213  |
| H | -10.3581 | 4.7522  | 4.1990  | O  | -5.1281  | -0.8284 | 5.4543  |
| H | -9.8757  | 6.0016  | 3.0238  | O  | -4.8372  | 1.0702  | 4.2450  |
| C | -8.2662  | 4.6757  | 3.7010  | O  | -7.0815  | 0.1852  | 2.5236  |
| H | -7.7184  | 5.5056  | 4.1322  | O  | -7.3986  | -1.6592 | 3.8018  |
| H | -8.1969  | 3.8222  | 4.3677  | O  | -6.7893  | 2.5039  | 5.9541  |
| C | -6.3144  | 3.4299  | 2.6870  | O  | -6.9583  | 0.6338  | 7.2244  |
| C | -5.9629  | 2.5480  | 1.6166  | C  | -9.6575  | 0.8174  | 4.8637  |
| H | -6.7667  | 2.1192  | 1.0179  | C  | -6.8242  | 1.8865  | 7.0711  |
| C | -8.7410  | 3.3668  | 1.8133  | C  | -4.4122  | 0.0320  | 4.8487  |
| H | -8.6647  | 3.3282  | 0.7298  | C  | -7.3144  | -1.0593 | 2.6855  |
| H | -8.6530  | 2.3679  | 2.2377  | C  | -6.6562  | 2.7329  | 8.3088  |
| C | -5.2589  | 4.3614  | 3.2309  | C  | -2.9227  | -0.2096 | 4.8316  |
| C | -4.2309  | 5.6019  | 5.0605  | C  | -7.5162  | -1.8705 | 1.4302  |
| H | -4.1915  | 5.8358  | 6.1216  | C  | -11.1486 | 1.0442  | 4.8091  |
| C | -5.1830  | 4.6917  | 4.5926  | H  | -7.1933  | 3.6787  | 8.1960  |
| H | -5.8562  | 4.2176  | 5.2936  | H  | -7.0063  | 2.2009  | 9.1957  |
| C | -7.3478  | 5.3844  | 1.4552  | H  | -5.5906  | 2.9633  | 8.4304  |
| C | -7.0225  | 5.1010  | 0.1212  | H  | -11.3835 | 2.0337  | 5.2155  |
| H | -7.0288  | 4.0884  | -0.2632 | H  | -11.4761 | 1.0326  | 3.7640  |
| C | -6.6602  | 6.1220  | -0.7427 | H  | -11.6825 | 0.2776  | 5.3734  |
| H | -6.4043  | 5.9046  | -1.7745 | H  | -7.0508  | -1.3667 | 0.5802  |
| C | -6.6030  | 7.4522  | -0.2922 | H  | -8.5932  | -1.9640 | 1.2419  |
| C | -6.9277  | 7.7340  | 1.0393  | H  | -7.1077  | -2.8763 | 1.5590  |
| C | -7.2931  | 6.6996  | 1.9055  | H  | -2.3976  | 0.6231  | 4.3609  |
| H | -7.5193  | 6.9640  | 2.9290  | H  | -2.7164  | -1.1333 | 4.2794  |
| C | -4.3451  | 4.9753  | 2.3513  | H  | -2.5622  | -0.3484 | 5.8560  |
| H | -4.3848  | 4.7475  | 1.2928  | N  | -15.0311 | 2.1097  | 0.8041  |
| C | -3.3928  | 5.8805  | 2.8171  | O  | -15.1004 | 1.1297  | 0.0495  |
| H | -2.7017  | 6.3398  | 2.1149  | O  | -16.0291 | 2.6870  | 1.2574  |
| C | -3.3317  | 6.2002  | 4.1765  | O  | -6.2263  | 8.3715  | -1.2121 |
| H | -6.8954  | 8.7458  | 1.4238  | C  | -6.1014  | 9.7352  | -0.8022 |
| N | -7.6296  | 4.2286  | 2.3895  | H  | -5.7693  | 10.2807 | -1.6874 |
| H | -2.5893  | 6.9055  | 4.5411  | H  | -7.0631  | 10.1411 | -0.4646 |
| C | -3.9583  | -0.4037 | 1.2569  | H  | -5.3550  | 9.8450  | -0.0057 |



**t-A-OAc-NO2-MeO****Energy (POTENTIAL) = -3094.67870688 Eh**

| Atom | X        | Y       | Z       |
|------|----------|---------|---------|
| S    | -3.0855  | 2.5475  | 0.8818  |
| O    | -2.3357  | 3.7234  | 0.4149  |
| O    | -3.9721  | 1.8424  | -0.0676 |
| N    | -10.1832 | 4.5255  | 2.4089  |
| N    | -3.9313  | 3.0551  | 2.2904  |
| C    | -13.1542 | 1.5687  | 3.0052  |
| C    | -13.4482 | 2.9246  | 3.2115  |
| H    | -14.4461 | 3.1958  | 3.5444  |
| C    | -12.4871 | 3.9087  | 2.9982  |
| H    | -12.7522 | 4.9459  | 3.1742  |
| C    | -11.1885 | 3.5644  | 2.5716  |
| C    | -10.9119 | 2.2046  | 2.3512  |
| H    | -9.9183  | 1.9036  | 2.0510  |
| C    | -11.8725 | 1.2158  | 2.5666  |
| H    | -11.5947 | 0.1806  | 2.4068  |
| C    | -10.5143 | 5.9426  | 2.2723  |
| H    | -10.9426 | 6.3372  | 3.1975  |
| H    | -11.2304 | 6.1187  | 1.4533  |
| C    | -9.1586  | 6.5761  | 1.9601  |
| H    | -9.2629  | 7.4632  | 1.3298  |
| H    | -8.6160  | 6.8523  | 2.8738  |
| C    | -6.0056  | 3.0689  | 3.4488  |
| C    | -5.2056  | 2.8399  | 2.2645  |
| H    | -5.7008  | 2.3529  | 1.4201  |
| C    | -9.0768  | 4.2077  | 1.5180  |
| H    | -9.4188  | 3.7386  | 0.5782  |
| H    | -8.3685  | 3.5210  | 1.9999  |
| C    | -6.1570  | 4.3499  | 4.0381  |
| C    | -6.9735  | 5.7609  | 5.8533  |
| H    | -7.4640  | 5.8705  | 6.8157  |
| C    | -6.8056  | 4.5016  | 5.3000  |
| H    | -7.1522  | 3.6217  | 5.8223  |
| C    | -7.3293  | 5.6378  | 0.5194  |
| C    | -6.7391  | 4.5108  | -0.1168 |
| H    | -7.1971  | 3.5325  | -0.0307 |
| C    | -5.5707  | 4.6378  | -0.8463 |
| H    | -5.1158  | 3.7703  | -1.3067 |
| C    | -4.9516  | 5.8885  | -0.9560 |
| C    | -5.5127  | 7.0170  | -0.3402 |
| C    | -6.6869  | 6.8991  | 0.3794  |
| H    | -7.1044  | 7.7771  | 0.8577  |
| C    | -5.6796  | 5.5193  | 3.3725  |
| H    | -5.1838  | 5.4246  | 2.4148  |
| C    | -5.8601  | 6.7726  | 3.9335  |
| H    | -5.5036  | 7.6561  | 3.4138  |
| C    | -6.5099  | 6.8947  | 5.1705  |
| H    | -5.0193  | 7.9772  | -0.4322 |
| N    | -8.4655  | 5.5012  | 1.2526  |
| H    | -6.6513  | 7.8797  | 5.6072  |
| C    | -1.9576  | 1.3557  | 1.6039  |
| H    | -1.3555  | 1.8580  | 2.3639  |
| H    | -2.5470  | 0.5482  | 2.0430  |
| H    | -1.3238  | 0.9795  | 0.7960  |
| Rh   | -6.8413  | 1.3023  | 3.9945  |
| Rh   | -7.9493  | -0.8206 | 4.5906  |
| O    | -8.5805  | 2.2435  | 4.5965  |
| O    | -9.5778  | 0.3058  | 5.2257  |
| O    | -6.2217  | -1.7787 | 3.9374  |
| O    | -5.1718  | 0.1797  | 3.4703  |
| O    | -7.5742  | 1.0099  | 2.0668  |
| O    | -8.6650  | -0.8976 | 2.6366  |
| O    | -6.1822  | 1.3999  | 5.9509  |
| O    | -7.1319  | -0.5930 | 6.4868  |
| C    | -9.5225  | 1.5691  | 5.1388  |
| C    | -6.4599  | 0.4454  | 6.7595  |
| C    | -5.2353  | -1.0975 | 3.5282  |
| C    | -8.2872  | -0.0230 | 1.8037  |
| C    | -5.9156  | 0.5970  | 8.1583  |
| C    | -4.0107  | -1.8374 | 3.0473  |
| C    | -8.6815  | -0.2016 | 0.3585  |
| C    | -10.6500 | 2.3569  | 5.7557  |
| H    | -6.2347  | 1.5592  | 8.5720  |
| H    | -6.2592  | -0.2171 | 8.7991  |
| H    | -4.8204  | 0.5989  | 8.1209  |
| H    | -10.5402 | 3.4221  | 5.5507  |
| H    | -11.6051 | 1.9987  | 5.3624  |
| H    | -10.6427 | 2.1859  | 6.8386  |
| H    | -8.8389  | 0.7665  | -0.1228 |

|   |          |         |         |   |         |        |         |
|---|----------|---------|---------|---|---------|--------|---------|
| H | -9.5790  | -0.8183 | 0.2775  | C | -8.8004 | 3.4957 | 1.6851  |
| H | -7.8598  | -0.7097 | -0.1616 | H | -8.6109 | 3.2386 | 0.6451  |
| H | -3.1209  | -1.4448 | 3.5493  | H | -8.6912 | 2.6008 | 2.2942  |
| H | -3.8911  | -1.6679 | 1.9712  | C | -5.4607 | 4.5351 | 3.7210  |
| H | -4.1042  | -2.9081 | 3.2383  | C | -5.2437 | 6.0779 | 5.5974  |
| N | -3.7291  | 6.0159  | -1.7111 | H | -5.5601 | 6.4071 | 6.5832  |
| O | -3.3308  | 5.0419  | -2.3617 | C | -5.8540 | 4.9777 | 5.0068  |
| O | -3.1318  | 7.1036  | -1.6852 | H | -6.6340 | 4.4415 | 5.5285  |
| O | -14.1684 | 0.6845  | 3.2542  | C | -7.2605 | 5.4100 | 1.2513  |
| C | -13.8801 | -0.7047 | 3.1316  | C | -6.9697 | 4.9977 | -0.0674 |
| H | -14.7985 | -1.2285 | 3.4070  | H | -7.2274 | 4.0097 | -0.4229 |
| H | -13.6078 | -0.9740 | 2.1021  | C | -6.3169 | 5.8430 | -0.9525 |
| H | -13.0721 | -1.0107 | 3.8104  | H | -6.0982 | 5.5154 | -1.9612 |

**t-A-B-OAc-NO2-MeO**

**Energy (POTENTIAL) = -3094.66074667 Eh**

| Atom | X        | Y      | Z       |    |         |         |        |
|------|----------|--------|---------|----|---------|---------|--------|
| S    | -4.2511  | 1.5774 | 0.1886  | C  | -6.1950 | 7.5475  | 0.7704 |
| O    | -3.0751  | 2.1311 | -0.5017 | C  | -6.8434 | 6.6939  | 1.6547 |
| O    | -5.5065  | 1.4212 | -0.5805 | H  | -7.0040 | 7.0467  | 2.6632 |
| N    | -10.1169 | 4.1098 | 1.8536  | C  | -4.4386 | 5.2516  | 3.0482 |
| N    | -4.4657  | 2.5258 | 1.5993  | H  | -4.1345 | 4.9477  | 2.0543 |
| C    | -13.4941 | 1.5484 | 1.8857  | C  | -3.8101 | 6.3338  | 3.6582 |
| C    | -13.6127 | 2.9036 | 2.2295  | H  | -3.0195 | 6.8628  | 3.1339 |
| H    | -14.5891 | 3.2853 | 2.5139  | C  | -4.2142 | 6.7527  | 4.9290 |
| C    | -12.5085 | 3.7460 | 2.2043  | H  | -5.8814 | 8.5330  | 1.0913 |
| H    | -12.6402 | 4.7928 | 2.4594  | N  | -7.8362 | 4.5013  | 2.1971 |
| C    | -11.2307 | 3.2603 | 1.8502  | H  | -3.7309 | 7.6056  | 5.3981 |
| C    | -11.1273 | 1.9061 | 1.4831  | C  | -3.8310 | -0.0102 | 0.9097 |
| H    | -10.1729 | 1.4803 | 1.1938  | H  | -2.9513 | 0.1176  | 1.5412 |
| C    | -12.2420 | 1.0598 | 1.4996  | H  | -4.6846 | -0.3570 | 1.4940 |
| H    | -12.1098 | 0.0215 | 1.2166  | H  | -3.6181 | -0.6943 | 0.0835 |
| C    | -10.0162 | 5.2245 | 2.8096  | Rh | -6.8513 | 1.6111  | 4.1655 |
| H    | -10.7397 | 5.1271 | 3.6248  | Rh | -7.4919 | -0.5114 | 5.2529 |
| H    | -10.1769 | 6.1884 | 2.3123  | O  | -8.8113 | 2.2283  | 4.5493 |
| C    | -8.5919  | 5.0860 | 3.3464  | O  | -9.4294 | 0.2171  | 5.3935 |
| H    | -8.1555  | 6.0089 | 3.7115  | O  | -5.5174 | -1.1091 | 5.0582 |
| H    | -8.5642  | 4.3415 | 4.1372  | O  | -4.9556 | 0.7954  | 3.9579 |
| C    | -6.1339  | 3.4092 | 3.1024  | O  | -7.4374 | 0.7149  | 2.3783 |
| C    | -5.7001  | 2.8289 | 1.8470  | O  | -7.8986 | -1.2754 | 3.3578 |
| H    | -6.4846  | 2.4995 | 1.1690  | O  | -6.2974 | 2.2699  | 6.0560 |
|      |          |        |         | O  | -7.0444 | 0.3807  | 7.0698 |
|      |          |        |         | C  | -9.6628 | 1.4137  | 5.0465 |
|      |          |        |         | C  | -6.5299 | 1.5406  | 7.0778 |

|   |          |         |         |   |          |        |         |
|---|----------|---------|---------|---|----------|--------|---------|
| C | -4.6935  | -0.3449 | 4.4682  | C | -11.2636 | 2.2494 | 1.2004  |
| C | -7.7917  | -0.5126 | 2.3522  | H | -10.3699 | 1.7589 | 0.8296  |
| C | -6.1180  | 2.1149  | 8.4118  | C | -12.4985 | 1.6398 | 0.9509  |
| C | -3.2745  | -0.8426 | 4.3296  | H | -12.5148 | 0.7087 | 0.3962  |
| C | -8.1354  | -1.0719 | 0.9933  | C | -9.7576  | 4.9235 | 3.3516  |
| C | -11.0745 | 1.9230  | 5.2004  | H | -10.4052 | 4.6197 | 4.1815  |
| H | -6.3064  | 3.1914  | 8.4374  | H | -9.9605  | 5.9745 | 3.1194  |
| H | -6.6469  | 1.6157  | 9.2265  | C | -8.3037  | 4.6742 | 3.7264  |
| H | -5.0404  | 1.9567  | 8.5431  | H | -7.7781  | 5.5144 | 4.1665  |
| H | -11.0788 | 3.0031  | 5.3636  | H | -8.2143  | 3.8197 | 4.3890  |
| H | -11.6251 | 1.7136  | 4.2761  | C | -6.3044  | 3.4842 | 2.7211  |
| H | -11.5739 | 1.4121  | 6.0270  | C | -5.9369  | 2.5940 | 1.6661  |
| H | -7.5709  | -0.5510 | 0.2160  | H | -6.7355  | 2.1426 | 1.0777  |
| H | -9.2059  | -0.9163 | 0.8097  | C | -8.7391  | 3.3511 | 1.8559  |
| H | -7.9362  | -2.1458 | 0.9601  | H | -8.6138  | 3.2214 | 0.7837  |
| H | -2.5983  | -0.0271 | 4.0673  | H | -8.6685  | 2.3870 | 2.3598  |
| H | -3.2419  | -1.6035 | 3.5408  | C | -5.2745  | 4.4404 | 3.2677  |
| H | -2.9550  | -1.3142 | 5.2632  | C | -4.2984  | 5.7207 | 5.0976  |
| N | -5.2517  | 8.0094  | -1.4586 | H | -4.2794  | 5.9680 | 6.1562  |
| O | -5.0460  | 7.6058  | -2.6060 | C | -5.2259  | 4.7873 | 4.6269  |
| O | -4.9107  | 9.1234  | -1.0511 | H | -5.8986  | 4.3060 | 5.3235  |
| O | -14.6434 | 0.8088  | 1.9505  | C | -7.3857  | 5.3878 | 1.4784  |
| C | -14.5638 | -0.5745 | 1.6244  | C | -7.0663  | 5.0956 | 0.1467  |
| H | -15.5739 | -0.9716 | 1.7485  | H | -7.0460  | 4.0799 | -0.2262 |
| H | -14.2422 | -0.7287 | 0.5855  | C | -6.7459  | 6.1202 | -0.7346 |
| H | -13.8808 | -1.1105 | 2.2974  | H | -6.4944  | 5.9016 | -1.7646 |

**t-B-OAc-NO2-MeO**

**Energy (POTENTIAL) = -3094.67491032 Eh**

| Atom | X        | Y       | Z       |
|------|----------|---------|---------|
| S    | -4.4781  | 1.0311  | 0.2940  |
| O    | -3.3614  | 1.4577  | -0.5716 |
| O    | -5.7368  | 0.6236  | -0.3772 |
| N    | -9.9487  | 4.0805  | 2.1652  |
| N    | -4.6984  | 2.2355  | 1.4373  |
| C    | -13.6803 | 2.2222  | 1.4205  |
| C    | -13.6033 | 3.4275  | 2.1346  |
| H    | -14.5227 | 3.8801  | 2.4941  |
| C    | -12.3788 | 4.0366  | 2.3770  |
| H    | -12.3558 | 4.9760  | 2.9200  |
| C    | -11.1789 | 3.4552  | 1.9165  |
| C    | -11.2636 | 2.2494  | 1.2004  |
| H    | -10.3699 | 1.7589  | 0.8296  |
| C    | -12.4985 | 1.6398  | 0.9509  |
| H    | -12.5148 | 0.7087  | 0.3962  |
| C    | -9.7576  | 4.9235  | 3.3516  |
| H    | -10.4052 | 4.6197  | 4.1815  |
| H    | -9.9605  | 5.9745  | 3.1194  |
| C    | -8.3037  | 4.6742  | 3.7264  |
| H    | -7.7781  | 5.5144  | 4.1665  |
| H    | -8.2143  | 3.8197  | 4.3890  |
| C    | -6.3044  | 3.4842  | 2.7211  |
| C    | -5.9369  | 2.5940  | 1.6661  |
| H    | -6.7355  | 2.1426  | 1.0777  |
| C    | -8.7391  | 3.3511  | 1.8559  |
| H    | -8.6138  | 3.2214  | 0.7837  |
| H    | -8.6685  | 2.3870  | 2.3598  |
| C    | -5.2745  | 4.4404  | 3.2677  |
| C    | -4.2984  | 5.7207  | 5.0976  |
| H    | -4.2794  | 5.9680  | 6.1562  |
| C    | -5.2259  | 4.7873  | 4.6269  |
| H    | -5.8986  | 4.3060  | 5.3235  |
| C    | -7.3857  | 5.3878  | 1.4784  |
| C    | -7.0663  | 5.0956  | 0.1467  |
| H    | -7.0460  | 4.0799  | -0.2262 |
| C    | -6.7459  | 6.1202  | -0.7346 |
| H    | -6.4944  | 5.9016  | -1.7646 |
| C    | -6.7422  | 7.4337  | -0.2682 |
| C    | -7.0543  | 7.7412  | 1.0512  |
| C    | -7.3763  | 6.7085  | 1.9291  |
| H    | -7.6055  | 6.9677  | 2.9522  |
| C    | -4.3575  | 5.0587  | 2.3947  |
| H    | -4.3748  | 4.8139  | 1.3391  |
| C    | -3.4290  | 5.9867  | 2.8641  |
| H    | -2.7343  | 6.4494  | 2.1678  |
| C    | -3.3965  | 6.3246  | 4.2200  |
| H    | -7.0412  | 8.7681  | 1.3933  |
| N    | -7.6406  | 4.2384  | 2.4215  |
| H    | -2.6733  | 7.0482  | 4.5872  |
| C    | -3.9072  | -0.3376 | 1.3069  |
| H    | -2.9872  | -0.0350 | 1.8091  |
| H    | -4.6829  | -0.5753 | 2.0330  |

|    |          |         |         |
|----|----------|---------|---------|
| H  | -3.7215  | -1.1843 | 0.6402  |
| Rh | -6.8130  | 1.4626  | 4.2273  |
| Rh | -7.0920  | -0.5427 | 5.6025  |
| O  | -8.8939  | 1.6673  | 4.3350  |
| O  | -9.1386  | -0.1878 | 5.6137  |
| O  | -5.0362  | -0.7851 | 5.4810  |
| O  | -4.7871  | 1.1156  | 4.2668  |
| O  | -7.0556  | 0.2180  | 2.5839  |
| O  | -7.3185  | -1.6381 | 3.8575  |
| O  | -6.7080  | 2.5213  | 6.0162  |
| O  | -6.8579  | 0.6463  | 7.2823  |
| C  | -9.5933  | 0.8086  | 4.9729  |
| C  | -6.7345  | 1.9007  | 7.1316  |
| C  | -4.3392  | 0.0858  | 4.8681  |
| C  | -7.2629  | -1.0312 | 2.7428  |
| C  | -6.6026  | 2.7542  | 8.3687  |
| C  | -2.8463  | -0.1310 | 4.8412  |
| C  | -7.4704  | -1.8381 | 1.4857  |
| C  | -11.0877 | 1.0133  | 4.9366  |
| H  | -7.3998  | 3.5055  | 8.3777  |
| H  | -6.6581  | 2.1460  | 9.2733  |
| H  | -5.6460  | 3.2870  | 8.3384  |
| H  | -11.3309 | 2.0157  | 5.3035  |
| H  | -11.4313 | 0.9543  | 3.8979  |
| H  | -11.6004 | 0.2622  | 5.5401  |
| H  | -7.0001  | -1.3348 | 0.6379  |
| H  | -8.5480  | -1.9194 | 1.2950  |
| H  | -7.0709  | -2.8478 | 1.6110  |
| H  | -2.3402  | 0.6979  | 4.3438  |
| H  | -2.6285  | -1.0662 | 4.3136  |
| H  | -2.4743  | -0.2345 | 5.8659  |
| N  | -6.3940  | 8.5196  | -1.1928 |
| O  | -6.1215  | 8.2212  | -2.3563 |
| O  | -6.3927  | 9.6715  | -0.7560 |
| O  | -14.9354 | 1.7120  | 1.2389  |
| C  | -15.0620 | 0.4856  | 0.5263  |
| H  | -16.1314 | 0.2651  | 0.4961  |
| H  | -14.6826 | 0.5719  | -0.5007 |
| H  | -14.5394 | -0.3347 | 1.0369  |

### Rh-Piv

**Energy (POTENTIAL) = -1605.4405554 Eh**

| Atom | X        | Y       | Z       |
|------|----------|---------|---------|
| Rh   | -6.0781  | 1.3057  | 4.2986  |
| Rh   | -7.0566  | -0.4604 | 5.5957  |
| O    | -7.9469  | 1.6750  | 3.5055  |
| O    | -8.8768  | 0.0290  | 4.7465  |
| O    | -5.1825  | -0.8386 | 6.3754  |
| O    | -4.2649  | 0.8417  | 5.1713  |
| O    | -5.7252  | -0.0837 | 2.8134  |
| O    | -6.6646  | -1.7456 | 4.0256  |
| O    | -6.5064  | 2.5967  | 5.8542  |
| O    | -7.4014  | 0.9259  | 7.0873  |
| C    | -8.9401  | 0.9871  | 3.9075  |
| C    | -7.0734  | 2.1419  | 6.9021  |
| C    | -4.1994  | -0.1161 | 6.0103  |
| C    | -6.1056  | -1.2895 | 2.9765  |
| C    | -7.4092  | 3.1573  | 7.9994  |
| C    | -2.8283  | -0.3871 | 6.6379  |
| C    | -5.8908  | -2.2379 | 1.7925  |
| C    | -10.3326 | 1.3647  | 3.3928  |
| C    | -6.8208  | -1.7523 | 0.6574  |
| H    | -6.5825  | -0.7241 | 0.3670  |
| H    | -6.7027  | -2.3976 | -0.2208 |
| H    | -7.8723  | -1.7878 | 0.9680  |
| C    | -4.4181  | -2.1418 | 1.3462  |
| H    | -3.7409  | -2.4500 | 2.1522  |
| H    | -4.2480  | -2.8022 | 0.4880  |
| H    | -4.1595  | -1.1198 | 1.0543  |
| C    | -6.2356  | -3.6841 | 2.1749  |
| H    | -5.6082  | -4.0382 | 2.9999  |
| H    | -7.2821  | -3.7784 | 2.4809  |
| H    | -6.0687  | -4.3395 | 1.3121  |
| C    | -1.7841  | -0.4992 | 5.5089  |
| H    | -1.7375  | 0.4203  | 4.9183  |
| H    | -0.7934  | -0.6866 | 5.9388  |
| H    | -2.0245  | -1.3294 | 4.8334  |
| C    | -2.8500  | -1.6796 | 7.4663  |
| H    | -1.8615  | -1.8461 | 7.9098  |
| H    | -3.5856  | -1.6248 | 8.2746  |
| H    | -3.0956  | -2.5464 | 6.8431  |

|   |          |         |         |   |          |         |        |
|---|----------|---------|---------|---|----------|---------|--------|
| C | -2.5025  | 0.8202  | 7.5461  | O | -6.2735  | 2.2629  | 7.6974 |
| H | -3.2470  | 0.9239  | 8.3451  | C | -9.0782  | 1.0944  | 3.5887 |
| H | -1.5208  | 0.6790  | 8.0132  | C | -6.5294  | 3.2582  | 6.8625 |
| H | -2.4822  | 1.7518  | 6.9713  | C | -4.5771  | -0.0341 | 6.1862 |
| C | -8.5094  | 4.0820  | 7.4315  | C | -6.1882  | -1.1497 | 3.1503 |
| H | -8.7771  | 4.8394  | 8.1772  | C | -6.7081  | 4.6066  | 7.5334 |
| H | -8.1651  | 4.5922  | 6.5263  | C | -3.2249  | -0.4559 | 6.7560 |
| H | -9.4131  | 3.5119  | 7.1836  | C | -5.8524  | -2.1777 | 2.0761 |
| C | -6.1426  | 3.9762  | 8.3193  | C | -10.3481 | 1.3002  | 2.7626 |
| H | -6.3704  | 4.7221  | 9.0895  | C | -7.0754  | -2.2062 | 1.1260 |
| H | -5.3417  | 3.3298  | 8.6986  | H | -7.2447  | -1.2240 | 0.6717 |
| H | -5.7718  | 4.4961  | 7.4313  | H | -6.8883  | -2.9285 | 0.3237 |
| C | -7.9157  | 2.4514  | 9.2655  | H | -7.9831  | -2.5097 | 1.6585 |
| H | -8.8203  | 1.8691  | 9.0649  | C | -4.5923  | -1.7329 | 1.3134 |
| H | -7.1590  | 1.7718  | 9.6724  | H | -3.7306  | -1.6536 | 1.9859 |
| H | -8.1508  | 3.1994  | 10.0318 | H | -4.3600  | -2.4763 | 0.5434 |
| C | -11.1034 | 0.0829  | 3.0248  | H | -4.7381  | -0.7651 | 0.8255 |
| H | -11.1969 | -0.5847 | 3.8858  | C | -5.6369  | -3.5629 | 2.7102 |
| H | -12.1093 | 0.3432  | 2.6758  | H | -4.8090  | -3.5450 | 3.4281 |
| H | -10.5953 | -0.4636 | 2.2208  | H | -6.5339  | -3.9137 | 3.2282 |
| C | -11.0403 | 2.0977  | 4.5565  | H | -5.3901  | -4.2821 | 1.9222 |
| H | -10.4896 | 3.0017  | 4.8435  | C | -2.3658  | -0.9617 | 5.5749 |
| H | -12.0487 | 2.3967  | 4.2473  | H | -2.2279  | -0.1803 | 4.8214 |
| H | -11.1251 | 1.4517  | 5.4367  | H | -1.3802  | -1.2641 | 5.9458 |
| C | -10.2325 | 2.2923  | 2.1724  | H | -2.8291  | -1.8309 | 5.0924 |
| H | -9.7023  | 1.8056  | 1.3463  | C | -3.3913  | -1.5618 | 7.8066 |
| H | -11.2400 | 2.5522  | 1.8272  | H | -2.4059  | -1.8446 | 8.1929 |
| H | -9.7032  | 3.2183  | 2.4156  | H | -4.0045  | -1.2238 | 8.6483 |

**Rh-OH-Piv**

**Energy (POTENTIAL) = -1605.8402179 Eh**

| Atom | X        | Y       | Z      |
|------|----------|---------|--------|
| Rh   | -6.2995  | 1.4809  | 4.3567 |
| Rh   | -7.4538  | -0.3094 | 5.5696 |
| O    | -8.0886  | 1.8711  | 3.3995 |
| O    | -9.0940  | 0.1139  | 4.4130 |
| O    | -5.6414  | -0.6132 | 6.6089 |
| O    | -4.5674  | 0.9141  | 5.3334 |
| O    | -5.8983  | 0.0658  | 2.9545 |
| O    | -6.8038  | -1.5755 | 4.1955 |
| O    | -6.6264  | 3.1186  | 5.6320 |
| O    | -6.2735  | 2.2629  | 7.6974 |
| C    | -9.0782  | 1.0944  | 3.5887 |
| C    | -6.5294  | 3.2582  | 6.8625 |
| C    | -4.5771  | -0.0341 | 6.1862 |
| C    | -6.1882  | -1.1497 | 3.1503 |
| C    | -6.7081  | 4.6066  | 7.5334 |
| C    | -3.2249  | -0.4559 | 6.7560 |
| C    | -5.8524  | -2.1777 | 2.0761 |
| C    | -10.3481 | 1.3002  | 2.7626 |
| C    | -7.0754  | -2.2062 | 1.1260 |
| H    | -7.2447  | -1.2240 | 0.6717 |
| H    | -6.8883  | -2.9285 | 0.3237 |
| H    | -7.9831  | -2.5097 | 1.6585 |
| C    | -4.5923  | -1.7329 | 1.3134 |
| H    | -3.7306  | -1.6536 | 1.9859 |
| H    | -4.3600  | -2.4763 | 0.5434 |
| H    | -4.7381  | -0.7651 | 0.8255 |
| C    | -5.6369  | -3.5629 | 2.7102 |
| H    | -4.8090  | -3.5450 | 3.4281 |
| H    | -6.5339  | -3.9137 | 3.2282 |
| H    | -5.3901  | -4.2821 | 1.9222 |
| C    | -2.3658  | -0.9617 | 5.5749 |
| H    | -2.2279  | -0.1803 | 4.8214 |
| H    | -1.3802  | -1.2641 | 5.9458 |
| H    | -2.8291  | -1.8309 | 5.0924 |
| C    | -3.3913  | -1.5618 | 7.8066 |
| H    | -2.4059  | -1.8446 | 8.1929 |
| H    | -4.0045  | -1.2238 | 8.6483 |
| H    | -3.8603  | -2.4532 | 7.3781 |
| C    | -2.5731  | 0.7931  | 7.3894 |
| H    | -3.1938  | 1.1930  | 8.2003 |
| H    | -1.5975  | 0.5222  | 7.8075 |
| H    | -2.4246  | 1.5825  | 6.6467 |
| C    | -7.8760  | 4.4872  | 8.5404 |
| H    | -8.0317  | 5.4609  | 9.0163 |
| H    | -8.8062  | 4.2016  | 8.0353 |
| H    | -7.6611  | 3.7521  | 9.3215 |
| C    | -7.0186  | 5.6770  | 6.4781 |
| H    | -7.1416  | 6.6442  | 6.9760 |
| H    | -6.2069  | 5.7659  | 5.7491 |
| H    | -7.9424  | 5.4492  | 5.9362 |

|   |          |         |        |    |         |         |         |
|---|----------|---------|--------|----|---------|---------|---------|
| C | -5.3954  | 4.9453  | 8.2773 | H  | -5.8591 | 4.8066  | -1.0282 |
| H | -5.1598  | 4.1960  | 9.0386 | H  | -7.4573 | 4.7861  | -1.8494 |
| H | -4.5530  | 5.0145  | 7.5797 | Rh | -6.1749 | 1.4174  | 4.3956  |
| H | -5.5114  | 5.9159  | 8.7708 | Rh | -7.0734 | -0.5087 | 5.6391  |
| C | -10.4421 | 0.0976  | 1.7944 | O  | -8.0745 | 1.7023  | 3.6382  |
| H | -10.5050 | -0.8469 | 2.3441 | O  | -8.9218 | -0.0372 | 4.8161  |
| H | -11.3406 | 0.1990  | 1.1756 | O  | -5.1526 | -0.8356 | 6.3604  |
| H | -9.5717  | 0.0564  | 1.1290 | O  | -4.3412 | 0.9610  | 5.2440  |
| C | -11.5637 | 1.3081  | 3.7119 | O  | -5.7932 | 0.0970  | 2.8463  |
| H | -11.5005 | 2.1345  | 4.4302 | O  | -6.6703 | -1.6672 | 3.9590  |
| H | -12.4814 | 1.4360  | 3.1272 | O  | -6.6466 | 2.5772  | 6.0387  |
| H | -11.6384 | 0.3702  | 4.2697 | O  | -7.4158 | 0.8007  | 7.2139  |
| C | -10.2795 | 2.6144  | 1.9725 | C  | -9.0258 | 0.9262  | 3.9978  |
| H | -9.4350  | 2.6205  | 1.2767 | C  | -7.1387 | 2.0291  | 7.0863  |
| H | -11.2022 | 2.7362  | 1.3942 | C  | -4.2197 | -0.0509 | 6.0180  |
| H | -10.1775 | 3.4760  | 2.6410 | C  | -6.1608 | -1.1259 | 2.9346  |
| H | -6.1662  | 1.4071  | 7.2324 | C  | -7.4138 | 2.9775  | 8.2597  |

**A-Piv**

**Energy (POTENTIAL) = -2557.3111108 Eh**

| Atom | X       | Y      | Z       |   |          |         |         |
|------|---------|--------|---------|---|----------|---------|---------|
| S    | -7.4735 | 3.4680 | 0.1071  | C | -2.8027  | -0.3072 | 6.5477  |
| O    | -8.9195 | 3.5832 | 0.3569  | C | -5.9780  | -1.9609 | 1.6617  |
| O    | -6.9588 | 2.2202 | -0.4950 | C | -10.3838 | 1.1838  | 3.3340  |
| N    | -6.6746 | 3.8375 | 1.5814  | C | -6.9652  | -1.4019 | 0.6115  |
| C    | -5.3492 | 2.9435 | 3.3476  | H | -6.7796  | -0.3427 | 0.4072  |
| C    | -5.8909 | 2.9023 | 2.0108  | H | -6.8607  | -1.9601 | -0.3264 |
| H    | -5.7150 | 1.9790 | 1.4451  | H | -8.0015  | -1.5053 | 0.9547  |
| C    | -4.3505 | 3.8596 | 3.7636  | C | -4.5280  | -1.7959 | 1.1636  |
| C    | -2.7195 | 5.5983 | 3.2334  | H | -3.8098  | -2.1429 | 1.9170  |
| H    | -2.2246 | 6.2401 | 2.5110  | H | -4.3802  | -2.3895 | 0.2539  |
| C    | -3.7013 | 4.7126 | 2.8210  | H | -4.3044  | -0.7500 | 0.9341  |
| H    | -3.9793 | 4.6590 | 1.7738  | C | -6.2785  | -3.4417 | 1.9327  |
| C    | -3.9685 | 3.9432 | 5.1352  | H | -5.6030  | -3.8542 | 2.6901  |
| H    | -4.4585 | 3.3061 | 5.8571  | H | -7.3055  | -3.5830 | 2.2832  |
| C    | -2.9928 | 4.8427 | 5.5364  | H | -6.1478  | -4.0161 | 1.0081  |
| H    | -2.7133 | 4.9084 | 6.5835  | C | -1.9024  | -0.6124 | 5.3310  |
| C    | -2.3661 | 5.6645 | 4.5896  | H | -1.8918  | 0.2278  | 4.6298  |
| H    | -1.5966 | 6.3617 | 4.9093  | H | -0.8754  | -0.8003 | 5.6656  |
| C    | -6.9411 | 4.8625 | -0.8884 | H | -2.2538  | -1.5031 | 4.7955  |
| H    | -7.2227 | 5.7838 | -0.3742 | C | -2.7905  | -1.4920 | 7.5239  |
|      |         |        |         | H | -1.7693  | -1.6565 | 7.8875  |
|      |         |        |         | H | -3.4366  | -1.3044 | 8.3879  |
|      |         |        |         | H | -3.1345  | -2.4109 | 7.0386  |
|      |         |        |         | C | -2.3144  | 0.9736  | 7.2559  |

|   |          |         |         |   |          |        |         |
|---|----------|---------|---------|---|----------|--------|---------|
| H | -2.9695  | 1.2329  | 8.0970  | C | -11.0515 | 2.1114 | 0.3682  |
| H | -1.3032  | 0.8185  | 7.6498  | H | -10.0490 | 1.7481 | 0.1733  |
| H | -2.2907  | 1.8221  | 6.5657  | C | -12.1390 | 1.3756 | -0.0959 |
| C | -8.4961  | 3.9794  | 7.8015  | H | -11.9482 | 0.4514 | -0.6384 |
| H | -8.7203  | 4.6815  | 8.6131  | C | -10.2946 | 5.1677 | 2.4825  |
| H | -8.1602  | 4.5503  | 6.9301  | H | -11.0612 | 4.9890 | 3.2462  |
| H | -9.4247  | 3.4605  | 7.5344  | H | -10.5470 | 6.0982 | 1.9555  |
| C | -6.1065  | 3.7270  | 8.5920  | C | -8.8848  | 5.2287 | 3.1054  |
| H | -6.2696  | 4.3992  | 9.4423  | H | -8.5824  | 6.2391 | 3.3770  |
| H | -5.3082  | 3.0247  | 8.8631  | H | -8.8298  | 4.5895 | 3.9892  |
| H | -5.7652  | 4.3231  | 7.7406  | C | -5.8441  | 2.9224 | 3.4896  |
| C | -7.9019  | 2.1965  | 9.4876  | C | -5.4297  | 2.3532 | 2.2202  |
| H | -8.8282  | 1.6541  | 9.2736  | H | -4.9545  | 1.3676 | 2.2564  |
| H | -7.1539  | 1.4689  | 9.8200  | C | -8.7954  | 3.5304 | 1.5718  |
| H | -8.0934  | 2.8931  | 10.3123 | H | -8.4515  | 3.1924 | 0.5969  |
| C | -11.5016 | 0.4602  | 4.0992  | H | -8.7059  | 2.6866 | 2.2699  |
| H | -11.5695 | 0.8169  | 5.1332  | C | -5.4130  | 4.1996 | 3.9438  |
| H | -12.4633 | 0.6496  | 3.6081  | C | -5.6256  | 6.0557 | 5.5091  |
| H | -11.3347 | -0.6207 | 4.1245  | H | -6.1294  | 6.5311 | 6.3453  |
| C | -10.6537 | 2.7004  | 3.2980  | C | -6.0554  | 4.8196 | 5.0523  |
| H | -9.8966  | 3.2204  | 2.7067  | H | -6.8935  | 4.3183 | 5.5184  |
| H | -11.6346 | 2.8879  | 2.8447  | C | -7.4159  | 5.5472 | 1.1552  |
| H | -10.6620 | 3.1225  | 4.3108  | C | -7.4940  | 5.4118 | -0.2412 |
| C | -10.2830 | 0.6340  | 1.8923  | H | -8.0743  | 4.6153 | -0.6908 |
| H | -10.0669 | -0.4413 | 1.8957  | C | -6.8181  | 6.2991 | -1.0814 |
| H | -11.2370 | 0.7868  | 1.3732  | H | -6.9038  | 6.1667 | -2.1582 |
| H | -9.5016  | 1.1502  | 1.3279  | C | -6.0489  | 7.3565 | -0.5785 |

**A\_tBu**

**Energy (POTENTIAL) = -3326.9401418 Eh**

| Atom | X        | Y      | Z       |
|------|----------|--------|---------|
| S    | -5.4876  | 2.0119 | -0.3085 |
| O    | -6.7948  | 1.9180 | -0.9833 |
| O    | -4.7365  | 0.7654 | -0.0469 |
| N    | -10.1729 | 4.0507 | 1.5451  |
| N    | -5.7406  | 2.9296 | 1.1083  |
| C    | -13.4627 | 1.7847 | 0.1212  |
| C    | -13.6494 | 2.9861 | 0.8175  |
| H    | -14.6609 | 3.3456 | 0.9984  |
| C    | -12.5773 | 3.7430 | 1.2894  |
| H    | -12.7742 | 4.6732 | 1.8120  |
| C    | -11.2458 | 3.3155 | 1.0849  |
| C    | -11.0515 | 2.1114 | 0.3682  |
| H    | -10.0490 | 1.7481 | 0.1733  |
| C    | -12.1390 | 1.3756 | -0.0959 |
| H    | -11.9482 | 0.4514 | -0.6384 |
| C    | -10.2946 | 5.1677 | 2.4825  |
| H    | -11.0612 | 4.9890 | 3.2462  |
| H    | -10.5470 | 6.0982 | 1.9555  |
| C    | -8.8848  | 5.2287 | 3.1054  |
| H    | -8.5824  | 6.2391 | 3.3770  |
| H    | -8.8298  | 4.5895 | 3.9892  |
| C    | -5.8441  | 2.9224 | 3.4896  |
| C    | -5.4297  | 2.3532 | 2.2202  |
| H    | -4.9545  | 1.3676 | 2.2564  |
| C    | -8.7954  | 3.5304 | 1.5718  |
| H    | -8.4515  | 3.1924 | 0.5969  |
| H    | -8.7059  | 2.6866 | 2.2699  |
| C    | -5.4130  | 4.1996 | 3.9438  |
| C    | -5.6256  | 6.0557 | 5.5091  |
| H    | -6.1294  | 6.5311 | 6.3453  |
| C    | -6.0554  | 4.8196 | 5.0523  |
| H    | -6.8935  | 4.3183 | 5.5184  |
| C    | -7.4159  | 5.5472 | 1.1552  |
| C    | -7.4940  | 5.4118 | -0.2412 |
| H    | -8.0743  | 4.6153 | -0.6908 |
| C    | -6.8181  | 6.2991 | -1.0814 |
| H    | -6.9038  | 6.1667 | -2.1582 |
| C    | -6.0489  | 7.3565 | -0.5785 |
| C    | -5.9850  | 7.4936 | 0.8156  |
| C    | -6.6456  | 6.6105 | 1.6657  |
| H    | -6.5458  | 6.7294 | 2.7391  |
| C    | -4.3257  | 4.8739 | 3.3212  |
| H    | -3.8358  | 4.4205 | 2.4665  |
| C    | -3.8778  | 6.0932 | 3.8126  |
| H    | -3.0359  | 6.5920 | 3.3424  |
| C    | -4.5277  | 6.6856 | 4.9018  |
| H    | -5.3944  | 8.2986 | 1.2491  |
| N    | -8.0093  | 4.6452 | 2.0726  |
| H    | -4.1821  | 7.6446 | 5.2779  |
| C    | -4.4477  | 3.1579 | -1.2159 |
| H    | -4.9683  | 4.1168 | -1.2713 |
| H    | -3.4933  | 3.2582 | -0.6936 |

|    |          |         |         |   |          |         |         |
|----|----------|---------|---------|---|----------|---------|---------|
| H  | -4.2977  | 2.7385  | -2.2146 | H | -8.6083  | -1.1995 | -0.1836 |
| C  | -14.6294 | 0.9470  | -0.3477 | H | -8.3643  | 0.3582  | 0.6304  |
| H  | -14.4358 | 0.4995  | -1.3302 | C | -8.3916  | -2.8398 | 2.0154  |
| H  | -14.8371 | 0.1188  | 0.3451  | H | -8.7916  | -3.3092 | 2.9184  |
| H  | -15.5463 | 1.5426  | -0.4248 | H | -8.8345  | -3.3323 | 1.1418  |
| C  | -5.2973  | 8.2953  | -1.4922 | H | -7.3087  | -3.0133 | 1.9904  |
| H  | -5.6700  | 8.2378  | -2.5209 | C | -10.2353 | -1.1100 | 2.0732  |
| H  | -5.3841  | 9.3367  | -1.1591 | H | -10.4799 | -0.0428 | 2.0717  |
| H  | -4.2247  | 8.0571  | -1.5187 | H | -10.7334 | -1.5720 | 1.2126  |
| Rh | -6.6830  | 1.4587  | 4.6305  | H | -10.6406 | -1.5581 | 2.9873  |
| Rh | -7.3718  | -0.4415 | 6.0445  | C | -3.8392  | 2.6875  | 8.3461  |
| O  | -8.4746  | 2.3762  | 5.1320  | H | -3.7509  | 3.3084  | 7.4497  |
| O  | -9.1369  | 0.5940  | 6.3657  | H | -3.3808  | 3.2223  | 9.1863  |
| O  | -5.5782  | -1.3788 | 5.5793  | H | -3.2715  | 1.7633  | 8.1816  |
| O  | -4.9772  | 0.3426  | 4.2402  | C | -6.1005  | 3.6983  | 8.8455  |
| O  | -7.5947  | 0.5085  | 3.0380  | H | -7.1640  | 3.5029  | 9.0311  |
| O  | -8.1690  | -1.2732 | 4.3129  | H | -5.7024  | 4.2522  | 9.7037  |
| O  | -5.8103  | 2.2394  | 6.3398  | H | -6.0148  | 4.3295  | 7.9560  |
| O  | -6.5084  | 0.5345  | 7.6598  | C | -5.4178  | 1.5263  | 9.9373  |
| C  | -9.3257  | 1.7306  | 5.8418  | H | -4.9738  | 2.0694  | 10.7799 |
| C  | -5.9281  | 1.6442  | 7.4652  | H | -6.4597  | 1.3001  | 10.1847 |
| C  | -4.8169  | -0.8283 | 4.7320  | H | -4.8847  | 0.5766  | 9.8221  |
| C  | -8.0984  | -0.6552 | 3.2077  | C | -2.3592  | -0.7247 | 4.2517  |
| C  | -5.3166  | 2.3796  | 8.6654  | H | -1.5006  | -1.2693 | 3.8419  |
| C  | -3.6179  | -1.6109 | 4.1847  | H | -2.4917  | 0.1958  | 3.6762  |
| C  | -8.7086  | -1.3342 | 1.9767  | H | -2.1253  | -0.4513 | 5.2880  |
| C  | -10.7002 | 2.3870  | 6.0178  | C | -3.9520  | -1.9461 | 2.7119  |
| C  | -11.3921 | 2.3234  | 4.6372  | H | -3.1344  | -2.5284 | 2.2711  |
| H  | -12.3627 | 2.8307  | 4.6791  | H | -4.8700  | -2.5432 | 2.6433  |
| H  | -10.7816 | 2.8024  | 3.8695  | H | -4.0905  | -1.0390 | 2.1145  |
| H  | -11.5646 | 1.2845  | 4.3315  | C | -3.3999  | -2.9036 | 4.9838  |
| C  | -11.5365 | 1.6298  | 7.0598  | H | -3.1946  | -2.6889 | 6.0382  |
| H  | -11.0504 | 1.6358  | 8.0416  | H | -4.2769  | -3.5564 | 4.9364  |
| H  | -12.5168 | 2.1103  | 7.1601  | H | -2.5424  | -3.4483 | 4.5717  |
| H  | -11.6930 | 0.5878  | 6.7657  |   |          |         |         |
| C  | -10.5144 | 3.8509  | 6.4612  |   |          |         |         |
| H  | -11.4941 | 4.3220  | 6.6014  |   |          |         |         |
| H  | -9.9710  | 3.9070  | 7.4128  |   |          |         |         |
| H  | -9.9600  | 4.4293  | 5.7188  |   |          |         |         |
| C  | -8.1546  | -0.7107 | 0.6870  |   |          |         |         |
| H  | -7.0681  | -0.8318 | 0.6212  |   |          |         |         |

  

| <b>A-B-ts-Piv-Me-Me</b>                      |         |        |         |
|----------------------------------------------|---------|--------|---------|
| <b>Energy (POTENTIAL) = -3326.9405468 Eh</b> |         |        |         |
| Atom                                         | X       | Y      | Z       |
| S                                            | -5.1699 | 1.8113 | -0.2279 |
| O                                            | -6.2992 | 1.3225 | -1.0361 |
| O                                            | -4.1617 | 0.8360 | 0.2427  |



|   |          |        |         |    |          |         |         |
|---|----------|--------|---------|----|----------|---------|---------|
| N | -10.1434 | 3.9838 | 1.6436  | H  | -3.0289  | 6.6115  | 3.3996  |
| N | -5.8411  | 2.7203 | 1.0501  | C  | -4.5030  | 6.6964  | 4.9764  |
| C | -13.5658 | 2.0519 | 0.0557  | H  | -5.4269  | 8.1841  | 1.1962  |
| C | -13.6672 | 3.2559 | 0.7666  | N  | -7.9448  | 4.4784  | 2.1229  |
| H | -14.6469 | 3.7074 | 0.9128  | H  | -4.1318  | 7.6357  | 5.3772  |
| C | -12.5499 | 3.8993 | 1.2962  | C  | -4.3391  | 3.1258  | -1.1261 |
| H | -12.6788 | 4.8364 | 1.8280  | H  | -5.0592  | 3.9260  | -1.3116 |
| C | -11.2564 | 3.3526 | 1.1313  | H  | -3.5028  | 3.4900  | -0.5249 |
| C | -11.1466 | 2.1447 | 0.4045  | H  | -3.9799  | 2.6992  | -2.0667 |
| H | -10.1762 | 1.6885 | 0.2452  | C  | -14.7891 | 1.3395  | -0.4723 |
| C | -12.2792 | 1.5219 | -0.1158 | H  | -14.5658 | 0.7821  | -1.3898 |
| H | -12.1536 | 0.5917 | -0.6669 | H  | -15.1828 | 0.6152  | 0.2554  |
| C | -10.1952 | 5.1009 | 2.5838  | H  | -15.5997 | 2.0434  | -0.6949 |
| H | -10.9603 | 4.9582 | 3.3569  | C  | -5.3883  | 8.1453  | -1.5458 |
| H | -10.4039 | 6.0463 | 2.0646  | H  | -5.7926  | 8.0783  | -2.5617 |
| C | -8.7776  | 5.0806 | 3.1872  | H  | -5.4739  | 9.1872  | -1.2144 |
| H | -8.4239  | 6.0666 | 3.4814  | H  | -4.3153  | 7.9154  | -1.6043 |
| H | -8.7407  | 4.4134 | 4.0481  | Rh | -6.7084  | 1.4783  | 4.6004  |
| C | -5.9321  | 3.0113 | 3.4502  | Rh | -7.3461  | -0.4382 | 6.0192  |
| C | -5.4017  | 2.4405 | 2.2285  | O  | -8.5309  | 2.3352  | 5.1007  |
| H | -4.6381  | 1.6677 | 2.3919  | O  | -9.1307  | 0.5583  | 6.3709  |
| C | -8.7974  | 3.3975 | 1.6364  | O  | -5.5431  | -1.3351 | 5.5235  |
| H | -8.4963  | 3.0505 | 0.6519  | O  | -4.9611  | 0.4230  | 4.2250  |
| H | -8.7187  | 2.5525 | 2.3301  | O  | -7.5945  | 0.4882  | 3.0110  |
| C | -5.4605  | 4.2612 | 3.9527  | O  | -8.1716  | -1.2766 | 4.3101  |
| C | -5.6085  | 6.0728 | 5.5756  | O  | -5.8518  | 2.2792  | 6.3100  |
| H | -6.0915  | 6.5326 | 6.4327  | O  | -6.4648  | 0.5372  | 7.6233  |
| C | -6.0720  | 4.8602 | 5.0875  | C  | -9.3587  | 1.6767  | 5.8244  |
| H | -6.9121  | 4.3629 | 5.5535  | C  | -5.9153  | 1.6624  | 7.4276  |
| C | -7.3884  | 5.3892 | 1.1828  | C  | -4.7798  | -0.7508 | 4.7000  |
| C | -7.4965  | 5.2362 | -0.2100 | C  | -8.1215  | -0.6615 | 3.2015  |
| H | -8.0755  | 4.4270 | -0.6378 | C  | -5.2747  | 2.3875  | 8.6192  |
| C | -6.8631  | 6.1279 | -1.0762 | C  | -3.5547  | -1.4992 | 4.1631  |
| H | -6.9753  | 5.9831 | -2.1487 | C  | -8.7996  | -1.3300 | 1.9992  |
| C | -6.1002  | 7.2045 | -0.6034 | C  | -10.7556 | 2.2891  | 5.9841  |
| C | -6.0076  | 7.3605 | 0.7857  | C  | -11.4376 | 2.1728  | 4.6017  |
| C | -6.6338  | 6.4772 | 1.6626  | H  | -12.4297 | 2.6377  | 4.6303  |
| H | -6.5220  | 6.6274 | 2.7299  | H  | -10.8447 | 2.6660  | 3.8289  |
| C | -4.3654  | 4.9294 | 3.3401  | H  | -11.5624 | 1.1221  | 4.3140  |
| H | -3.8985  | 4.4957 | 2.4617  | C  | -11.5696 | 1.5244  | 7.0380  |
| C | -3.8782  | 6.1204 | 3.8650  | H  | -11.0913 | 1.5722  | 8.0226  |

|   |          |         |         |
|---|----------|---------|---------|
| H | -12.5685 | 1.9684  | 7.1210  |
| H | -11.6835 | 0.4705  | 6.7677  |
| C | -10.6247 | 3.7677  | 6.3962  |
| H | -11.6216 | 4.2049  | 6.5258  |
| H | -10.0853 | 3.8646  | 7.3466  |
| H | -10.0925 | 4.3505  | 5.6411  |
| C | -8.2823  | -0.7331 | 0.6830  |
| H | -7.2089  | -0.9102 | 0.5617  |
| H | -8.8029  | -1.1963 | -0.1637 |
| H | -8.4393  | 0.3456  | 0.6387  |
| C | -8.5282  | -2.8448 | 2.0340  |
| H | -8.9050  | -3.2966 | 2.9559  |
| H | -9.0231  | -3.3278 | 1.1832  |
| H | -7.4537  | -3.0538 | 1.9648  |
| C | -10.3147 | -1.0629 | 2.1572  |
| H | -10.5329 | 0.0100  | 2.1573  |
| H | -10.8600 | -1.5187 | 1.3224  |
| H | -10.6922 | -1.4942 | 3.0910  |
| C | -3.8150  | 2.7272  | 8.2538  |
| H | -3.7679  | 3.3644  | 7.3658  |
| H | -3.3364  | 3.2555  | 9.0868  |
| H | -3.2378  | 1.8158  | 8.0537  |
| C | -6.0743  | 3.6876  | 8.8546  |
| H | -7.1265  | 3.4688  | 9.0752  |
| H | -5.6546  | 4.2319  | 9.7088  |
| H | -6.0338  | 4.3384  | 7.9761  |
| C | -5.3146  | 1.5092  | 9.8773  |
| H | -4.8510  | 2.0453  | 10.7139 |
| H | -6.3428  | 1.2591  | 10.1571 |
| H | -4.7687  | 0.5722  | 9.7255  |
| C | -2.3270  | -0.5694 | 4.2057  |
| H | -1.4510  | -1.0947 | 3.8077  |
| H | -2.4911  | 0.3307  | 3.6065  |
| H | -2.1011  | -0.2622 | 5.2343  |
| C | -3.8844  | -1.8717 | 2.6982  |
| H | -3.0503  | -2.4362 | 2.2648  |
| H | -4.7827  | -2.4996 | 2.6459  |
| H | -4.0529  | -0.9801 | 2.0859  |
| C | -3.2876  | -2.7685 | 4.9848  |
| H | -3.0867  | -2.5278 | 6.0346  |
| H | -4.1403  | -3.4535 | 4.9523  |

|   |         |         |        |
|---|---------|---------|--------|
| H | -2.4120 | -3.2890 | 4.5794 |
|---|---------|---------|--------|

**B-Piv-Me-Me**

**Energy (POTENTIAL) = -3326.964343 Eh**

| Atom | X        | Y      | Z       |
|------|----------|--------|---------|
| S    | -5.2869  | 1.4925 | 0.2009  |
| O    | -5.7182  | 0.0801 | 0.1233  |
| O    | -3.8779  | 1.7501 | 0.5796  |
| N    | -10.2854 | 3.6128 | 2.1811  |
| N    | -6.3775  | 2.3701 | 1.1132  |
| C    | -12.9381 | 3.4168 | -1.1359 |
| C    | -13.1243 | 4.3328 | -0.0942 |
| H    | -13.9711 | 5.0152 | -0.1273 |
| C    | -12.2559 | 4.3991 | 0.9958  |
| H    | -12.4548 | 5.1189 | 1.7822  |
| C    | -11.1411 | 3.5419 | 1.0805  |
| C    | -10.9558 | 2.6036 | 0.0429  |
| H    | -10.1292 | 1.9032 | 0.0714  |
| C    | -11.8337 | 2.5583 | -1.0374 |
| H    | -11.6542 | 1.8263 | -1.8223 |
| C    | -10.3211 | 4.7397 | 3.1134  |
| H    | -11.1173 | 4.6465 | 3.8603  |
| H    | -10.4571 | 5.6839 | 2.5728  |
| C    | -8.9511  | 4.6849 | 3.7824  |
| H    | -8.5982  | 5.6529 | 4.1190  |
| H    | -8.9259  | 3.9668 | 4.5978  |
| C    | -6.6782  | 3.5883 | 3.2118  |
| C    | -5.9296  | 2.8578 | 2.2455  |
| H    | -4.8913  | 2.6915 | 2.5331  |
| C    | -8.9998  | 2.9725 | 2.2531  |
| H    | -8.6548  | 2.5208 | 1.3347  |
| H    | -8.9382  | 2.2369 | 3.0489  |
| C    | -5.9160  | 4.6360 | 3.9739  |
| C    | -5.6366  | 6.1113 | 5.8953  |
| H    | -5.9633  | 6.4277 | 6.8821  |
| C    | -6.3009  | 5.0643 | 5.2565  |
| H    | -7.1069  | 4.5578 | 5.7710  |
| C    | -7.8418  | 5.1270 | 1.6030  |
| C    | -8.0153  | 4.8036 | 0.2567  |
| H    | -8.3328  | 3.8213 | -0.0563 |
| C    | -7.7808  | 5.7677 | -0.7244 |

|    |          |         |         |   |          |         |         |
|----|----------|---------|---------|---|----------|---------|---------|
| H  | -7.9312  | 5.4971  | -1.7663 | C | -8.5848  | -1.5565 | 2.1363  |
| C  | -7.3613  | 7.0621  | -0.3972 | C | -10.7617 | 1.4336  | 6.3065  |
| C  | -7.1982  | 7.3677  | 0.9601  | C | -11.4824 | 1.3575  | 4.9404  |
| C  | -7.4358  | 6.4193  | 1.9532  | H | -12.5524 | 1.5558  | 5.0739  |
| H  | -7.2880  | 6.7032  | 2.9863  | H | -11.0824 | 2.0909  | 4.2335  |
| C  | -4.8023  | 5.2655  | 3.3817  | H | -11.3760 | 0.3610  | 4.4935  |
| H  | -4.4942  | 4.9806  | 2.3800  | C | -10.8787 | 2.8578  | 6.8840  |
| C  | -4.1075  | 6.2820  | 4.0390  | H | -11.9316 | 3.0929  | 7.0791  |
| H  | -3.2522  | 6.7467  | 3.5555  | H | -10.3300 | 2.9465  | 7.8296  |
| C  | -4.5340  | 6.7237  | 5.2929  | H | -10.4849 | 3.6044  | 6.1882  |
| H  | -6.8804  | 8.3648  | 1.2539  | C | -11.3741 | 0.4178  | 7.2810  |
| N  | -8.0508  | 4.1044  | 2.6932  | H | -10.8586 | 0.4345  | 8.2473  |
| H  | -4.0102  | 7.5301  | 5.7992  | H | -12.4297 | 0.6604  | 7.4505  |
| C  | -5.5763  | 2.2373  | -1.4093 | H | -11.3145 | -0.6005 | 6.8844  |
| H  | -6.6298  | 2.1145  | -1.6697 | C | -3.2125  | 1.8093  | 7.8889  |
| H  | -5.3121  | 3.2960  | -1.3635 | H | -2.9873  | 2.2021  | 6.8909  |
| H  | -4.9421  | 1.7136  | -2.1297 | H | -2.4437  | 2.1690  | 8.5831  |
| C  | -13.8974 | 3.3294  | -2.2992 | H | -3.1579  | 0.7154  | 7.8502  |
| H  | -13.3676 | 3.1709  | -3.2463 | C | -4.6651  | 3.8114  | 8.3882  |
| H  | -14.5998 | 2.4925  | -2.1812 | H | -5.6641  | 4.1659  | 8.6694  |
| H  | -14.4938 | 4.2436  | -2.3959 | H | -3.9493  | 4.1964  | 9.1245  |
| C  | -7.0719  | 8.0865  | -1.4656 | H | -4.4187  | 4.2332  | 7.4121  |
| H  | -7.6121  | 7.8637  | -2.3918 | C | -4.9054  | 1.7113  | 9.7624  |
| H  | -7.3489  | 9.0948  | -1.1387 | H | -4.1750  | 2.1033  | 10.4801 |
| H  | -6.0003  | 8.1060  | -1.7060 | H | -5.9060  | 2.0023  | 10.1040 |
| Rh | -6.7416  | 1.5209  | 4.6417  | H | -4.8482  | 0.6195  | 9.7724  |
| Rh | -6.8655  | -0.5235 | 5.9877  | C | -2.3042  | -1.5783 | 4.8700  |
| O  | -8.6411  | 1.9762  | 5.3507  | H | -1.3808  | -1.9424 | 4.4044  |
| O  | -8.8059  | 0.0319  | 6.4929  | H | -2.0300  | -1.0053 | 5.7639  |
| O  | -4.9510  | -0.9659 | 5.3507  | H | -2.8932  | -2.4429 | 5.1889  |
| O  | -4.8646  | 0.8790  | 4.0460  | C | -3.4923  | -1.5535 | 2.6374  |
| O  | -7.6398  | 0.4228  | 3.1295  | H | -4.0480  | -0.9516 | 1.9110  |
| O  | -7.6390  | -1.4915 | 4.3336  | H | -2.5951  | -1.9472 | 2.1444  |
| O  | -5.8071  | 2.4028  | 6.2841  | H | -4.1195  | -2.4016 | 2.9363  |
| O  | -6.0473  | 0.5423  | 7.5534  | C | -2.2184  | 0.4832  | 3.4128  |
| C  | -9.2837  | 1.1163  | 6.0459  | H | -1.9674  | 1.1354  | 4.2583  |
| C  | -5.5881  | 1.7072  | 7.3287  | H | -1.2807  | 0.1131  | 2.9807  |
| C  | -4.3915  | -0.2179 | 4.4878  | H | -2.7356  | 1.0763  | 2.6550  |
| C  | -7.9048  | -0.8115 | 3.2919  | C | -9.0953  | -0.5661 | 1.0801  |
| C  | -4.6101  | 2.2776  | 8.3640  | H | -8.2724  | 0.0220  | 0.6668  |
| C  | -3.0787  | -0.7080 | 3.8672  | H | -9.5812  | -1.1149 | 0.2643  |

|   |          |         |        |   |         |         |        |
|---|----------|---------|--------|---|---------|---------|--------|
| H | -9.8323  | 0.1185  | 1.5131 | C | -3.2674 | 7.8125  | 5.0129 |
| C | -9.7612  | -2.3753 | 2.7029 | H | -3.0774 | 8.8757  | 4.8913 |
| H | -10.2603 | -2.9183 | 1.8916 | C | -4.4221 | 7.2574  | 4.4605 |
| H | -9.4192  | -3.1005 | 3.4470 | H | -5.0977 | 7.8963  | 3.9049 |
| H | -10.5031 | -1.7213 | 3.1791 | C | -7.3492 | 6.9823  | 3.1219 |
| C | -7.5272  | -2.4966 | 1.5172 | C | -7.6844 | 8.2859  | 3.4753 |
| H | -7.1448  | -3.2013 | 2.2634 | H | -7.8398 | 8.5839  | 4.5035 |
| H | -7.9785  | -3.0714 | 0.6993 | C | -7.8120 | 9.2522  | 2.4734 |
| H | -6.6894  | -1.9200 | 1.1127 | H | -8.0706 | 10.2686 | 2.7580 |

### B\_<sub>-</sub>Piv-Me-Me

Energy (POTENTIAL) = -3326.9675724 Eh

| Atom | X        | Y      | Z      |    |          |         |         |
|------|----------|--------|--------|----|----------|---------|---------|
| S    | -6.5263  | 2.6673 | 1.3604 | C  | -7.2831  | 7.6136  | 0.8022  |
| O    | -6.1058  | 3.8381 | 0.5433 | C  | -7.1463  | 6.6378  | 1.7852  |
| O    | -7.7638  | 1.9758 | 0.9567 | H  | -6.8792  | 5.6256  | 1.5004  |
| N    | -9.4587  | 5.8062 | 4.5949 | C  | -3.7696  | 5.0910  | 5.3082  |
| N    | -6.6998  | 3.1440 | 2.9340 | H  | -3.9900  | 4.0414  | 5.4666  |
| C    | -13.6221 | 5.3161 | 3.9270 | C  | -2.6055  | 5.6453  | 5.8401  |
| C    | -13.1339 | 6.1111 | 4.9692 | H  | -1.9101  | 5.0092  | 6.3815  |
| H    | -13.8350 | 6.6137 | 5.6322 | C  | -2.3506  | 7.0113  | 5.6995  |
| C    | -11.7657 | 6.2733 | 5.1957 | H  | -7.1215  | 7.3356  | -0.2363 |
| H    | -11.4395 | 6.8894 | 6.0265 | N  | -7.2082  | 5.8779  | 4.1453  |
| C    | -10.8226 | 5.6380 | 4.3661 | H  | -1.4508  | 7.4488  | 6.1234  |
| C    | -11.3051 | 4.8352 | 3.3105 | C  | -5.1532  | 1.5000  | 1.2453  |
| H    | -10.6188 | 4.3077 | 2.6575 | H  | -4.2413  | 2.0117  | 1.5586  |
| C    | -12.6734 | 4.6873 | 3.1058 | H  | -5.3583  | 0.6440  | 1.8834  |
| H    | -13.0107 | 4.0524 | 2.2891 | H  | -5.0697  | 1.2012  | 0.1970  |
| C    | -8.9273  | 6.4741 | 5.7746 | C  | -15.1020 | 5.1305  | 3.6882  |
| H    | -9.2414  | 5.9931 | 6.7111 | H  | -15.4105 | 5.5466  | 2.7198  |
| H    | -9.2499  | 7.5187 | 5.8027 | H  | -15.3765 | 4.0678  | 3.6792  |
| C    | -7.4083  | 6.3340 | 5.5934 | H  | -15.6973 | 5.6225  | 4.4652  |
| H    | -6.8317  | 7.2333 | 5.7897 | C  | -7.7745  | 9.9780  | 0.0431  |
| H    | -7.0125  | 5.5133 | 6.1867 | H  | -7.8489  | 10.9866 | 0.4620  |
| C    | -5.8685  | 5.1998 | 3.9990 | H  | -6.9290  | 9.9566  | -0.6546 |
| C    | -5.7081  | 4.0150 | 3.3672 | H  | -8.6814  | 9.7930  | -0.5473 |
| H    | -4.6659  | 3.7098 | 3.2496 | Rh | -6.8472  | 1.5136  | 4.5521  |
| C    | -8.4468  | 4.9646 | 4.0259 | Rh | -6.9386  | -0.3073 | 6.1706  |
| H    | -8.6173  | 4.7105 | 2.9879 | O  | -8.8917  | 1.7354  | 4.8176  |
| H    | -8.2335  | 4.0641 | 4.6035 | O  | -8.9695  | 0.0743  | 6.3576  |
| C    | -4.6945  | 5.8827 | 4.5981 | O  | -4.8920  | -0.5346 | 5.8781  |
|      |          |        |        | O  | -4.8052  | 1.2061  | 4.4318  |
|      |          |        |        | O  | -7.1765  | 0.0702  | 3.1248  |
|      |          |        |        | O  | -7.3459  | -1.6180 | 4.6178  |

|   |          |         |         |   |          |         |        |
|---|----------|---------|---------|---|----------|---------|--------|
| O | -6.5535  | 2.8250  | 6.2006  | H | -6.4296  | -3.6714 | 2.7687 |
| O | -6.5596  | 1.0776  | 7.6406  | C | -9.3740  | -1.8847 | 2.1869 |
| C | -9.4990  | 0.9999  | 5.6654  | H | -9.7654  | -2.5235 | 1.3862 |
| C | -6.4852  | 2.3159  | 7.3700  | H | -9.8759  | -2.1609 | 3.1218 |
| C | -4.2708  | 0.2758  | 5.1232  | H | -9.6243  | -0.8445 | 1.9520 |
| C | -7.4006  | -1.1424 | 3.4413  | C | -11.6378 | 0.2575  | 6.7961 |
| C | -6.3442  | 3.2680  | 8.5704  | H | -11.1649 | 0.2511  | 7.7833 |
| C | -2.7435  | 0.1588  | 5.0236  | H | -12.7008 | 0.4938  | 6.9250 |
| C | -7.8419  | -2.0693 | 2.3029  | H | -11.5594 | -0.7520 | 6.3784 |
| C | -10.9904 | 1.2959  | 5.8699  | C | -11.0857 | 2.7019  | 6.5012 |
| C | -5.2501  | 4.3101  | 8.2858  | H | -10.6160 | 3.4492  | 5.8588 |
| H | -5.4740  | 4.9050  | 7.4004  | H | -12.1365 | 2.9812  | 6.6395 |
| H | -5.1518  | 4.9891  | 9.1411  | H | -10.5912 | 2.7261  | 7.4805 |
| H | -4.2803  | 3.8255  | 8.1244  | C | -11.6838 | 1.2845  | 4.4929 |
| C | -7.7135  | 3.9573  | 8.7595  | H | -11.6099 | 0.2946  | 4.0259 |
| H | -8.4950  | 3.2212  | 8.9835  | H | -12.7462 | 1.5294  | 4.6088 |
| H | -7.6637  | 4.6668  | 9.5939  | H | -11.2331 | 2.0175  | 3.8200 |
| H | -8.0124  | 4.5050  | 7.8621  |   |          |         |        |
| C | -5.9852  | 2.4848  | 9.8439  |   |          |         |        |
| H | -5.0347  | 1.9527  | 9.7271  |   |          |         |        |
| H | -5.8857  | 3.1815  | 10.6848 |   |          |         |        |
| H | -6.7552  | 1.7496  | 10.0944 |   |          |         |        |
| C | -2.1415  | 1.4967  | 5.5056  |   |          |         |        |
| H | -1.0468  | 1.4479  | 5.4669  |   |          |         |        |
| H | -2.4732  | 2.3264  | 4.8751  |   |          |         |        |
| H | -2.4341  | 1.7116  | 6.5412  |   |          |         |        |
| C | -2.2247  | -0.9961 | 5.8916  |   |          |         |        |
| H | -2.6458  | -1.9551 | 5.5723  |   |          |         |        |
| H | -1.1330  | -1.0557 | 5.8100  |   |          |         |        |
| H | -2.4827  | -0.8489 | 6.9453  |   |          |         |        |
| C | -2.3723  | -0.0782 | 3.5453  |   |          |         |        |
| H | -1.2835  | -0.1561 | 3.4423  |   |          |         |        |
| H | -2.8164  | -1.0089 | 3.1710  |   |          |         |        |
| H | -2.7210  | 0.7446  | 2.9150  |   |          |         |        |
| C | -7.1674  | -1.6489 | 0.9852  |   |          |         |        |
| H | -7.5142  | -2.2973 | 0.1717  |   |          |         |        |
| H | -7.4037  | -0.6110 | 0.7362  |   |          |         |        |
| H | -6.0767  | -1.7453 | 1.0521  |   |          |         |        |
| C | -7.5092  | -3.5312 | 2.6384  |   |          |         |        |
| H | -8.0054  | -3.8523 | 3.5589  |   |          |         |        |
| H | -7.8406  | -4.1835 | 1.8218  |   |          |         |        |

**B-C-ts-Piv-Me-Me****Energy (POTENTIAL) = -3326.9611575 Eh**

| Atom | X        | Y       | Z       |
|------|----------|---------|---------|
| S    | -5.9009  | 2.6981  | 1.3899  |
| O    | -5.2980  | 3.8309  | 0.6363  |
| O    | -7.0582  | 2.0250  | 0.7717  |
| N    | -9.4879  | 5.5612  | 4.2885  |
| N    | -6.3489  | 3.2161  | 2.8997  |
| C    | -12.5888 | 7.0523  | 1.7859  |
| C    | -12.6778 | 7.1082  | 3.1824  |
| H    | -13.5640 | 7.5329  | 3.6478  |
| C    | -11.6557 | 6.6163  | 3.9952  |
| H    | -11.7594 | 6.6465  | 5.0756  |
| C    | -10.5033 | 6.0729  | 3.4184  |
| C    | -10.3923 | 6.0132  | 2.0240  |
| H    | -9.4914  | 5.6323  | 1.5566  |
| C    | -11.4282 | 6.4951  | 1.2275  |
| H    | -11.3205 | 6.4537  | 0.1463  |
| C    | -9.0218  | 6.3282  | 5.4533  |
| H    | -9.3000  | 5.8275  | 6.3837  |
| H    | -9.4859  | 7.3133  | 5.4385  |
| C    | -7.4607  | 6.4019  | 5.3470  |
| H    | -7.1008  | 7.4069  | 5.5680  |
| H    | -7.0144  | 5.7150  | 6.0621  |
| C    | -5.6781  | 5.2967  | 4.0396  |
| C    | -5.4257  | 4.0957  | 3.4651  |
| H    | -4.3761  | 3.7945  | 3.4777  |
| C    | -8.5675  | 4.6608  | 3.9218  |
| H    | -8.6135  | 4.1987  | 2.9476  |
| H    | -8.1118  | 4.0748  | 4.7065  |
| C    | -4.5829  | 6.0365  | 4.7155  |
| C    | -3.4030  | 8.1009  | 5.2582  |
| H    | -3.3309  | 9.1826  | 5.1784  |
| C    | -4.4620  | 7.4377  | 4.6377  |
| H    | -5.1875  | 8.0121  | 4.0719  |
| C    | -7.2015  | 6.8775  | 2.9073  |
| C    | -7.8357  | 8.1091  | 3.0935  |
| H    | -8.1320  | 8.4537  | 4.0754  |
| C    | -8.1021  | 8.9338  | 1.9963  |
| H    | -8.6034  | 9.8836  | 2.1650  |
| C    | -7.7447  | 8.5607  | 0.6983  |
| C    | -7.0859  | 7.3310  | 0.5358  |
| C    | -6.8152  | 6.4973  | 1.6153  |
| H    | -6.3151  | 5.5527  | 1.4433  |
| C    | -3.6074  | 5.3302  | 5.4485  |
| H    | -3.7062  | 4.2563  | 5.5685  |
| C    | -2.5416  | 5.9941  | 6.0554  |
| H    | -1.8060  | 5.4224  | 6.6156  |
| C    | -2.4340  | 7.3844  | 5.9665  |
| H    | -6.7825  | 7.0119  | -0.4588 |
| N    | -7.0058  | 5.9347  | 4.0055  |
| H    | -1.6103  | 7.9038  | 6.4487  |
| C    | -4.5587  | 1.5018  | 1.5623  |
| H    | -3.7270  | 1.9949  | 2.0692  |
| H    | -4.9088  | 0.6475  | 2.1354  |
| H    | -4.2569  | 1.2080  | 0.5532  |
| C    | -13.7100 | 7.5504  | 0.9064  |
| H    | -13.3244 | 8.0202  | -0.0056 |
| H    | -14.3621 | 6.7238  | 0.5927  |
| H    | -14.3364 | 8.2815  | 1.4288  |
| C    | -8.0761  | 9.4256  | -0.4926 |
| H    | -8.2964  | 10.4561 | -0.1943 |
| H    | -7.2517  | 9.4453  | -1.2148 |
| H    | -8.9582  | 9.0390  | -1.0207 |
| Rh   | -6.8178  | 1.5638  | 4.4371  |
| Rh   | -7.2856  | -0.2177 | 6.0401  |
| O    | -8.8676  | 1.8348  | 4.2893  |
| O    | -9.2986  | 0.2548  | 5.8519  |
| O    | -5.2298  | -0.5359 | 6.1172  |
| O    | -4.8077  | 1.1813  | 4.7007  |
| O    | -6.9256  | 0.0996  | 2.9947  |
| O    | -7.4719  | -1.5375 | 4.4561  |
| O    | -6.7479  | 2.8870  | 6.0944  |
| O    | -7.0704  | 1.1745  | 7.5374  |
| C    | -9.6505  | 1.1746  | 5.0471  |
| C    | -6.8188  | 2.3886  | 7.2691  |
| C    | -4.4491  | 0.2200  | 5.4595  |
| C    | -7.2770  | -1.0905 | 3.2836  |
| C    | -6.6161  | 3.3270  | 8.4708  |
| C    | -2.9382  | -0.0370 | 5.5417  |
| C    | -7.4865  | -2.0261 | 2.0865  |
| C    | -11.1289 | 1.5859  | 5.0321  |

|   |          |         |         |   |         |         |        |
|---|----------|---------|---------|---|---------|---------|--------|
| C | -5.4330  | 4.2700  | 8.1965  | H | -3.1073 | -2.0375 | 6.4052 |
| H | -5.5847  | 4.8592  | 7.2918  | H | -1.5355 | -1.2517 | 6.6585 |
| H | -5.2990  | 4.9578  | 9.0398  | H | -2.9492 | -0.7485 | 7.6086 |
| H | -4.5030  | 3.7031  | 8.0713  | C | -2.4867 | -0.5509 | 4.1565 |
| C | -7.9204  | 4.1327  | 8.6489  | H | -1.4099 | -0.7570 | 4.1687 |
| H | -8.7738  | 3.4669  | 8.8243  | H | -3.0068 | -1.4800 | 3.8918 |
| H | -7.8295  | 4.8054  | 9.5098  | H | -2.6886 | 0.1882  | 3.3755 |
| H | -8.1362  | 4.7393  | 7.7660  |   |         |         |        |
| C | -6.3392  | 2.5124  | 9.7455  |   |         |         |        |
| H | -7.1759  | 1.8526  | 9.9917  |   |         |         |        |
| H | -5.4423  | 1.8937  | 9.6311  |   |         |         |        |
| H | -6.1785  | 3.1959  | 10.5878 |   |         |         |        |
| C | -11.2614 | 2.7180  | 6.0792  |   |         |         |        |
| H | -10.6267 | 3.5712  | 5.8156  |   |         |         |        |
| H | -12.3003 | 3.0656  | 6.1216  |   |         |         |        |
| H | -10.9753 | 2.3667  | 7.0774  |   |         |         |        |
| C | -12.0207 | 0.3979  | 5.4255  |   |         |         |        |
| H | -13.0720 | 0.7090  | 5.4301  |   |         |         |        |
| H | -11.9128 | -0.4281 | 4.7126  |   |         |         |        |
| H | -11.7671 | 0.0220  | 6.4206  |   |         |         |        |
| C | -11.5256 | 2.1124  | 3.6418  |   |         |         |        |
| H | -11.3867 | 1.3429  | 2.8732  |   |         |         |        |
| H | -12.5824 | 2.4044  | 3.6448  |   |         |         |        |
| H | -10.9317 | 2.9848  | 3.3573  |   |         |         |        |
| C | -8.5780  | -1.3916 | 1.1965  |   |         |         |        |
| H | -8.2762  | -0.3913 | 0.8722  |   |         |         |        |
| H | -8.7476  | -2.0175 | 0.3121  |   |         |         |        |
| H | -9.5277  | -1.3077 | 1.7402  |   |         |         |        |
| C | -7.9164  | -3.4245 | 2.5502  |   |         |         |        |
| H | -8.0695  | -4.0695 | 1.6767  |   |         |         |        |
| H | -7.1551  | -3.8864 | 3.1879  |   |         |         |        |
| H | -8.8527  | -3.3862 | 3.1164  |   |         |         |        |
| C | -6.1617  | -2.1091 | 1.3003  |   |         |         |        |
| H | -5.3478  | -2.4873 | 1.9316  |   |         |         |        |
| H | -6.2778  | -2.7930 | 0.4512  |   |         |         |        |
| H | -5.8735  | -1.1274 | 0.9149  |   |         |         |        |
| C | -2.2302  | 1.2951  | 5.8641  |   |         |         |        |
| H | -1.1466  | 1.1379  | 5.9197  |   |         |         |        |
| H | -2.4317  | 2.0458  | 5.0946  |   |         |         |        |
| H | -2.5647  | 1.6949  | 6.8295  |   |         |         |        |
| C | -2.6180  | -1.0823 | 6.6193  |   |         |         |        |

**C-Piv-Me-Me**

**Energy (POTENTIAL) = -3326.9776979 Eh**

| Atom | X        | Y      | Z       |
|------|----------|--------|---------|
| S    | -7.1784  | 2.9005 | 1.5877  |
| O    | -7.0947  | 4.1271 | 0.7511  |
| O    | -8.3825  | 2.0606 | 1.4175  |
| N    | -9.8075  | 5.1223 | 3.9925  |
| N    | -7.0856  | 3.3031 | 3.1929  |
| C    | -11.5564 | 7.2762 | 0.7785  |
| C    | -12.1296 | 7.3024 | 2.0589  |
| H    | -13.0255 | 7.8923 | 2.2342  |
| C    | -11.5670 | 6.5887 | 3.1157  |
| H    | -12.0215 | 6.6171 | 4.1016  |
| C    | -10.4172 | 5.8292 | 2.8886  |
| C    | -9.8355  | 5.7686 | 1.6227  |
| H    | -8.9214  | 5.2088 | 1.4609  |
| C    | -10.4123 | 6.4905 | 0.5797  |
| H    | -9.9440  | 6.4605 | -0.4008 |
| C    | -9.4543  | 5.8914 | 5.2158  |
| H    | -9.9052  | 5.3971 | 6.0803  |
| H    | -9.9021  | 6.8753 | 5.1099  |
| C    | -7.9231  | 5.9661 | 5.4162  |
| H    | -7.7303  | 6.7709 | 6.1431  |
| H    | -7.5874  | 5.0314 | 5.8634  |
| C    | -5.9694  | 5.3172 | 4.0853  |
| C    | -5.9625  | 4.0886 | 3.5231  |
| H    | -4.9960  | 3.5994 | 3.4201  |
| C    | -9.4450  | 3.8837 | 3.8982  |
| H    | -9.7022  | 3.3013 | 3.0236  |
| H    | -9.0149  | 3.3983 | 4.7582  |
| C    | -4.7300  | 5.8583 | 4.7054  |
| C    | -3.3328  | 7.7269 | 5.4182  |
| H    | -3.1760  | 8.8004 | 5.4883  |

|    |          |         |         |   |          |         |         |
|----|----------|---------|---------|---|----------|---------|---------|
| C  | -4.4985  | 7.2422  | 4.8228  | C | -9.3559  | 0.3891  | 5.8085  |
| H  | -5.2273  | 7.9456  | 4.4367  | C | -6.6407  | 2.3567  | 7.4383  |
| C  | -7.3350  | 7.2066  | 3.3301  | C | -4.1001  | 0.7148  | 5.1138  |
| C  | -8.0552  | 8.3514  | 3.7165  | C | -6.9485  | -1.2308 | 3.5410  |
| H  | -8.4448  | 8.4451  | 4.7241  | C | -6.6613  | 3.3743  | 8.5885  |
| C  | -8.2737  | 9.3950  | 2.8116  | C | -2.5788  | 0.8076  | 4.9358  |
| H  | -8.8506  | 10.2578 | 3.1384  | C | -7.2821  | -2.2427 | 2.4383  |
| C  | -7.7671  | 9.3603  | 1.5098  | C | -10.8788 | 0.3258  | 5.9860  |
| C  | -7.0120  | 8.2314  | 1.1471  | C | -5.6714  | 4.5123  | 8.2733  |
| C  | -6.7970  | 7.1772  | 2.0254  | H | -5.9115  | 5.0126  | 7.3338  |
| H  | -6.2573  | 6.2976  | 1.6952  | H | -5.6957  | 5.2564  | 9.0782  |
| C  | -3.7659  | 4.9819  | 5.2490  | H | -4.6468  | 4.1306  | 8.1967  |
| H  | -3.9577  | 3.9140  | 5.2489  | C | -8.1020  | 3.9235  | 8.6887  |
| C  | -2.5964  | 5.4683  | 5.8318  | H | -8.8134  | 3.1172  | 8.9069  |
| H  | -1.8719  | 4.7683  | 6.2405  | H | -8.1634  | 4.6585  | 9.4998  |
| C  | -2.3701  | 6.8452  | 5.9174  | H | -8.4130  | 4.4115  | 7.7608  |
| H  | -6.5991  | 8.1673  | 0.1421  | C | -6.2740  | 2.7046  | 9.9156  |
| N  | -7.1672  | 6.1035  | 4.1825  | H | -6.9666  | 1.8981  | 10.1752 |
| H  | -1.4637  | 7.2263  | 6.3803  | H | -5.2652  | 2.2814  | 9.8668  |
| C  | -5.7181  | 1.9293  | 1.1518  | H | -6.2949  | 3.4496  | 10.7199 |
| H  | -4.8311  | 2.5436  | 1.3205  | C | -11.3679 | 1.7315  | 6.3950  |
| H  | -5.6968  | 1.0266  | 1.7588  | H | -11.1617 | 2.4662  | 5.6106  |
| H  | -5.8034  | 1.6870  | 0.0892  | H | -12.4498 | 1.7127  | 6.5701  |
| C  | -12.1238 | 8.1068  | -0.3459 | H | -10.8793 | 2.0667  | 7.3185  |
| H  | -11.5695 | 9.0503  | -0.4442 | C | -11.2632 | -0.6982 | 7.0628  |
| H  | -12.0486 | 7.5854  | -1.3065 | H | -12.3535 | -0.7225 | 7.1749  |
| H  | -13.1749 | 8.3595  | -0.1710 | H | -10.9229 | -1.7036 | 6.7949  |
| C  | -8.0206  | 10.4745 | 0.5222  | H | -10.8242 | -0.4403 | 8.0323  |
| H  | -8.6108  | 11.2814 | 0.9706  | C | -11.4968 | -0.0716 | 4.6287  |
| H  | -7.0826  | 10.9116 | 0.1548  | H | -11.1599 | -1.0682 | 4.3194  |
| H  | -8.5676  | 10.1114 | -0.3582 | H | -12.5903 | -0.0914 | 4.7079  |
| Rh | -6.8869  | 1.4743  | 4.6529  | H | -11.2176 | 0.6408  | 3.8465  |
| Rh | -6.5692  | -0.3259 | 6.2706  | C | -2.2175  | 1.6647  | 3.7128  |
| O  | -8.9302  | 1.2368  | 4.9551  | H | -2.5737  | 2.6930  | 3.8186  |
| O  | -8.6292  | -0.3852 | 6.5034  | H | -1.1279  | 1.6911  | 3.5934  |
| O  | -4.5309  | -0.1480 | 5.9417  | H | -2.6511  | 1.2490  | 2.7964  |
| O  | -4.8236  | 1.5256  | 4.4479  | C | -2.0204  | 1.4544  | 6.2240  |
| O  | -6.9745  | -0.0002 | 3.2150  | H | -2.2467  | 0.8398  | 7.1017  |
| O  | -6.7383  | -1.6800 | 4.7119  | H | -0.9318  | 1.5601  | 6.1465  |
| O  | -6.8354  | 2.8114  | 6.2603  | H | -2.4485  | 2.4511  | 6.3839  |
| O  | -6.4572  | 1.1364  | 7.7336  | C | -2.0083  | -0.6141 | 4.7693  |



|   |         |         |        |   |         |         |        |
|---|---------|---------|--------|---|---------|---------|--------|
| H | -2.4138 | -1.0981 | 3.8723 | C | -6.1046 | 4.2693  | 3.7664 |
| H | -0.9179 | -0.5677 | 4.6659 | H | -5.2424 | 3.6119  | 3.7500 |
| H | -2.2485 | -1.2404 | 5.6330 | C | -9.0856 | 4.1332  | 4.4107 |
| C | -6.9800 | -1.6524 | 1.0514 | H | -9.5584 | 3.2931  | 3.9291 |
| H | -7.2657 | -2.3718 | 0.2749 | H | -8.6195 | 3.9614  | 5.3709 |
| H | -7.5314 | -0.7227 | 0.8882 | C | -4.5646 | 5.9504  | 4.6905 |
| H | -5.9108 | -1.4382 | 0.9369 | C | -2.9226 | 7.6698  | 5.2476 |
| C | -6.4943 | -3.5454 | 2.6518 | H | -2.6434 | 8.7203  | 5.2619 |
| H | -6.7157 | -3.9895 | 3.6263 | C | -4.1679 | 7.3006  | 4.7358 |
| H | -6.7588 | -4.2699 | 1.8727 | H | -4.8295 | 8.0730  | 4.3629 |
| H | -5.4137 | -3.3665 | 2.5970 | C | -6.9315 | 7.5673  | 3.2209 |
| C | -8.8006 | -2.5110 | 2.5735 | C | -7.5608 | 8.8036  | 3.4661 |
| H | -9.1195 | -3.2348 | 1.8140 | H | -8.0699 | 8.9927  | 4.4038 |
| H | -9.0407 | -2.9196 | 3.5615 | C | -7.5325 | 9.8219  | 2.5080 |
| H | -9.3747 | -1.5883 | 2.4310 | H | -8.0339 | 10.7613 | 2.7330 |

**C-4-ts-Piv-Me-Me**

**Energy (POTENTIAL) = -3326.9742159 Eh**

| Atom | X        | Y      | Z      |    |          |         |         |
|------|----------|--------|--------|----|----------|---------|---------|
| S    | -7.6293  | 3.4016 | 1.8329 | C  | -6.8753  | 9.6685  | 1.2845  |
| O    | -7.5475  | 4.6961 | 1.1275 | C  | -6.2445  | 8.4345  | 1.0505  |
| O    | -8.8835  | 2.6340 | 1.7264 | C  | -6.2718  | 7.4053  | 1.9829  |
| N    | -9.5948  | 5.3355 | 4.1797 | H  | -5.8056  | 6.4556  | 1.7539  |
| N    | -7.3264  | 3.5985 | 3.4843 | C  | -3.6755  | 4.9910  | 5.2233  |
| C    | -12.2852 | 5.8857 | 0.9340 | H  | -3.9753  | 3.9505  | 5.2812  |
| C    | -12.5430 | 4.9387 | 1.9336 | C  | -2.4292  | 5.3611  | 5.7256  |
| H    | -13.4439 | 4.3326 | 1.8801 | H  | -1.7689  | 4.5977  | 6.1289  |
| C    | -11.6674 | 4.7660 | 3.0066 | C  | -2.0403  | 6.7037  | 5.7354  |
| H    | -11.8843 | 4.0379 | 3.7829 | H  | -5.7276  | 8.2710  | 0.1066  |
| C    | -10.5050 | 5.5356 | 3.0830 | N  | -6.9429  | 6.5233  | 4.1566  |
| C    | -10.2237 | 6.4823 | 2.0931 | H  | -1.0712  | 6.9933  | 6.1330  |
| H    | -9.3076  | 7.0591 | 2.1401 | C  | -6.2717  | 2.3905  | 1.2130  |
| C    | -11.1129 | 6.6521 | 1.0349 | H  | -5.3334  | 2.9286  | 1.3617  |
| H    | -10.8841 | 7.3827 | 0.2626 | H  | -6.2745  | 1.4367  | 1.7375  |
| C    | -9.2615  | 6.4832 | 5.0492 | H  | -6.4562  | 2.2493  | 0.1443  |
| H    | -9.8180  | 6.3893 | 5.9898 | C  | -13.2386 | 6.0917  | -0.2185 |
| H    | -9.6214  | 7.3777 | 4.5437 | H  | -12.7074 | 6.0863  | -1.1778 |
| C    | -7.7629  | 6.5939 | 5.3568 | H  | -14.0057 | 5.3111  | -0.2496 |
| H    | -7.5980  | 7.5178 | 5.9310 | H  | -13.7507 | 7.0600  | -0.1406 |
| H    | -7.4513  | 5.7715 | 6.0021 | C  | -6.8216  | 10.7772 | 0.2603  |
| C    | -5.8976  | 5.5459 | 4.1521 | H  | -7.1329  | 10.4264 | -0.7320 |
|      |          |        |        | H  | -7.4733  | 11.6126 | 0.5391  |
|      |          |        |        | H  | -5.8033  | 11.1752 | 0.1511  |
|      |          |        |        | Rh | -7.0780  | 1.5653  | 4.7131  |
|      |          |        |        | Rh | -6.7063  | -0.3079 | 6.2199  |

|   |          |         |        |   |         |         |         |
|---|----------|---------|--------|---|---------|---------|---------|
| O | -9.0906  | 1.3875  | 5.1619 | H | -6.3479 | -2.4719 | 0.4336  |
| O | -8.7476  | -0.3517 | 6.5662 | H | -6.2329 | -0.7689 | 0.9208  |
| O | -4.6848  | -0.1499 | 5.7942 | H | -5.2807 | -2.0043 | 1.7724  |
| O | -5.0340  | 1.5519  | 4.3484 | C | -8.7506 | -1.6637 | 1.5892  |
| O | -7.3114  | 0.1700  | 3.2047 | H | -8.9080 | -2.3120 | 0.7193  |
| O | -6.9576  | -1.5751 | 4.6027 | H | -9.5952 | -1.8045 | 2.2750  |
| O | -6.8491  | 2.8266  | 6.3406 | H | -8.7525 | -0.6224 | 1.2551  |
| O | -6.4946  | 1.0897  | 7.7447 | C | -7.4371 | -3.4875 | 2.7390  |
| C | -9.4903  | 0.4991  | 5.9806 | H | -6.4939 | -3.7693 | 3.2178  |
| C | -6.6262  | 2.3264  | 7.4948 | H | -8.2460 | -3.6652 | 3.4557  |
| C | -4.2870  | 0.7111  | 4.9483 | H | -7.5942 | -4.1441 | 1.8752  |
| C | -7.2134  | -1.0755 | 3.4625 | C | -7.8969 | 4.0277  | 8.7802  |
| C | -6.5277  | 3.3248  | 8.6545 | H | -7.8670 | 4.7580  | 9.5974  |
| C | -2.7821  | 0.7545  | 4.6569 | H | -8.1567 | 4.5562  | 7.8578  |
| C | -7.4162  | -2.0245 | 2.2742 | H | -8.6938 | 3.3058  | 8.9984  |
| C | -10.9904 | 0.4478  | 6.2951 | C | -5.4345 | 4.3565  | 8.3093  |
| C | -11.7449 | 1.5552  | 5.5433 | H | -5.3471 | 5.0911  | 9.1185  |
| H | -12.8130 | 1.5034  | 5.7852 | H | -4.4597 | 3.8700  | 8.1863  |
| H | -11.3774 | 2.5475  | 5.8264 | H | -5.6657 | 4.8866  | 7.3820  |
| H | -11.6325 | 1.4498  | 4.4596 | C | -6.1827 | 2.6072  | 9.9668  |
| C | -11.1586 | 0.6318  | 7.8180 | H | -6.9474 | 1.8703  | 10.2321 |
| H | -12.2217 | 0.5938  | 8.0831 | H | -5.2228 | 2.0855  | 9.8924  |
| H | -10.6347 | -0.1542 | 8.3702 | H | -6.1135 | 3.3402  | 10.7790 |
| H | -10.7624 | 1.6020  | 8.1437 |   |         |         |         |
| C | -11.5152 | -0.9385 | 5.8667 |   |         |         |         |
| H | -11.3779 | -1.0942 | 4.7895 |   |         |         |         |
| H | -10.9918 | -1.7391 | 6.3983 |   |         |         |         |
| H | -12.5861 | -1.0169 | 6.0877 |   |         |         |         |
| C | -2.4776  | 1.6520  | 3.4479 |   |         |         |         |
| H | -2.7888  | 2.6857  | 3.6234 |   |         |         |         |
| H | -1.3985  | 1.6493  | 3.2534 |   |         |         |         |
| H | -2.9875  | 1.2917  | 2.5477 |   |         |         |         |
| C | -2.2904  | -0.6809 | 4.3858 |   |         |         |         |
| H | -1.2110  | -0.6736 | 4.1947 |   |         |         |         |
| H | -2.4882  | -1.3346 | 5.2399 |   |         |         |         |
| H | -2.7886  | -1.1071 | 3.5062 |   |         |         |         |
| C | -2.0981  | 1.3179  | 5.9224 |   |         |         |         |
| H | -1.0142  | 1.3702  | 5.7673 |   |         |         |         |
| H | -2.4589  | 2.3280  | 6.1484 |   |         |         |         |
| H | -2.2936  | 0.6812  | 6.7914 |   |         |         |         |
| C | -6.2454  | -1.7982 | 1.2925 |   |         |         |         |

  

| <b>H-Piv-Me-Me</b>                           |          |        |        |
|----------------------------------------------|----------|--------|--------|
| <b>Energy (POTENTIAL) = -3326.9816596 Eh</b> |          |        |        |
| Atom                                         | X        | Y      | Z      |
| S                                            | -7.6416  | 3.5246 | 1.8337 |
| O                                            | -7.5414  | 4.8136 | 1.1365 |
| O                                            | -8.8552  | 2.7136 | 1.6844 |
| N                                            | -9.2717  | 5.4770 | 3.9450 |
| N                                            | -7.4449  | 3.7656 | 3.5790 |
| C                                            | -12.2136 | 6.0513 | 0.9110 |
| C                                            | -12.2448 | 4.9157 | 1.7281 |
| H                                            | -13.0307 | 4.1766 | 1.5877 |
| C                                            | -11.2967 | 4.7137 | 2.7345 |
| H                                            | -11.3699 | 3.8271 | 3.3571 |
| C                                            | -10.2666 | 5.6413 | 2.9394 |
| C                                            | -10.2220 | 6.7787 | 2.1149 |
| H                                            | -9.4150  | 7.4923 | 2.2452 |
| C                                            | -11.1853 | 6.9824 | 1.1315 |

|   |          |         |         |    |          |         |         |
|---|----------|---------|---------|----|----------|---------|---------|
| H | -11.1248 | 7.8706  | 0.5054  | H  | -12.7663 | 6.2848  | -1.1707 |
| C | -9.2239  | 6.4645  | 5.0219  | H  | -13.9980 | 5.4865  | -0.1802 |
| H | -9.8664  | 6.1761  | 5.8717  | C  | -7.0409  | 10.7515 | 0.3552  |
| H | -9.6197  | 7.4004  | 4.6266  | H  | -7.3786  | 11.7186 | 0.7445  |
| C | -7.7914  | 6.6741  | 5.5440  | H  | -6.0690  | 10.9048 | -0.1301 |
| H | -7.7591  | 7.5850  | 6.1568  | H  | -7.7463  | 10.4507 | -0.4320 |
| H | -7.5011  | 5.8523  | 6.2012  | Rh | -7.1478  | 1.5930  | 4.7803  |
| C | -5.8943  | 5.6311  | 4.3565  | Rh | -6.7450  | -0.3193 | 6.2042  |
| C | -6.1973  | 4.3958  | 3.9045  | O  | -9.1410  | 1.4347  | 5.2838  |
| H | -5.3793  | 3.6928  | 3.8280  | O  | -8.7752  | -0.3665 | 6.6018  |
| C | -8.7583  | 4.1824  | 4.2420  | O  | -4.7379  | -0.1678 | 5.7043  |
| H | -9.4429  | 3.3863  | 3.9652  | O  | -5.1265  | 1.5751  | 4.3206  |
| H | -8.5429  | 4.0833  | 5.3042  | O  | -7.4586  | 0.2694  | 3.2284  |
| C | -4.5045  | 5.8904  | 4.8420  | O  | -7.0527  | -1.5229 | 4.5476  |
| C | -2.6951  | 7.4497  | 5.3338  | O  | -6.8317  | 2.8010  | 6.4242  |
| H | -2.3226  | 8.4707  | 5.3480  | O  | -6.4830  | 1.0174  | 7.7691  |
| C | -3.9926  | 7.2006  | 4.8860  | C  | -9.5314  | 0.4976  | 6.0550  |
| H | -4.6084  | 8.0316  | 4.5634  | C  | -6.5990  | 2.2647  | 7.5593  |
| C | -6.8635  | 7.7004  | 3.4740  | C  | -4.3685  | 0.6940  | 4.8462  |
| C | -7.5343  | 8.9212  | 3.6888  | C  | -7.3542  | -0.9851 | 3.4361  |
| H | -8.0226  | 9.1218  | 4.6358  | C  | -6.4777  | 3.2263  | 8.7460  |
| C | -7.5833  | 9.8936  | 2.6876  | C  | -2.8954  | 0.6680  | 4.4248  |
| H | -8.1191  | 10.8197 | 2.8868  | C  | -7.6597  | -1.8914 | 2.2391  |
| C | -6.9582  | 9.7130  | 1.4488  | C  | -11.0430 | 0.3929  | 6.2822  |
| C | -6.2725  | 8.5040  | 1.2520  | C  | -11.6376 | 1.8050  | 6.4398  |
| C | -6.2234  | 7.5168  | 2.2303  | H  | -11.4664 | 2.4097  | 5.5448  |
| H | -5.7137  | 6.5838  | 2.0244  | H  | -12.7185 | 1.7353  | 6.6078  |
| C | -3.6818  | 4.8451  | 5.3117  | H  | -11.1932 | 2.3275  | 7.2958  |
| H | -4.0710  | 3.8342  | 5.3684  | C  | -11.6217 | -0.2846 | 5.0175  |
| C | -2.3835  | 5.0966  | 5.7547  | H  | -11.2041 | -1.2894 | 4.8836  |
| H | -1.7722  | 4.2729  | 6.1130  | H  | -12.7101 | -0.3770 | 5.1114  |
| C | -1.8792  | 6.3997  | 5.7621  | H  | -11.3999 | 0.3035  | 4.1205  |
| H | -5.7730  | 8.3225  | 0.3022  | C  | -11.3497 | -0.4558 | 7.5252  |
| N | -6.8123  | 6.7146  | 4.4661  | H  | -10.9152 | -0.0096 | 8.4271  |
| H | -0.8696  | 6.5959  | 6.1129  | H  | -12.4349 | -0.5217 | 7.6663  |
| C | -6.1959  | 2.5528  | 1.3899  | H  | -10.9532 | -1.4704 | 7.4249  |
| H | -5.2960  | 3.1409  | 1.5728  | C  | -2.6233  | 1.6805  | 3.3020  |
| H | -6.1971  | 1.6180  | 1.9459  | H  | -1.5683  | 1.6255  | 3.0096  |
| H | -6.3052  | 2.3686  | 0.3172  | H  | -3.2347  | 1.4662  | 2.4188  |
| C | -13.2362 | 6.2734  | -0.1784 | H  | -2.8346  | 2.7052  | 3.6208  |
| H | -13.7488 | 7.2367  | -0.0586 | C  | -2.5639  | -0.7580 | 3.9373  |

|   |         |         |         |   |          |         |        |
|---|---------|---------|---------|---|----------|---------|--------|
| H | -1.5096 | -0.8125 | 3.6425  | C | -11.1697 | 0.0726  | 3.9459 |
| H | -2.7440 | -1.4963 | 4.7240  | H | -10.6019 | -0.8519 | 4.0176 |
| H | -3.1745 | -1.0280 | 3.0666  | C | -10.6516 | 1.1084  | 3.1743 |
| C | -2.0531 | 1.0107  | 5.6723  | H | -9.6904  | 0.9597  | 2.7072 |
| H | -0.9885 | 1.0162  | 5.4121  | C | -11.3584 | 2.3181  | 3.0133 |
| H | -2.3138 | 2.0016  | 6.0625  | C | -12.5764 | 2.4529  | 3.7052 |
| H | -2.2122 | 0.2767  | 6.4685  | H | -13.1558 | 3.3660  | 3.6332 |
| C | -6.8660 | -1.3851 | 1.0179  | C | -13.0691 | 1.4109  | 4.4945 |
| H | -7.0732 | -2.0233 | 0.1511  | H | -14.0139 | 1.5552  | 5.0143 |
| H | -7.1437 | -0.3580 | 0.7646  | C | -11.3685 | 4.7113  | 2.2889 |
| H | -5.7859 | -1.4130 | 1.2092  | H | -12.4619 | 4.7258  | 2.2182 |
| C | -9.1765 | -1.7680 | 1.9671  | H | -10.9913 | 5.2544  | 1.4204 |
| H | -9.4538 | -2.4011 | 1.1161  | C | -10.9345 | 5.4297  | 3.5834 |
| H | -9.7609 | -2.0911 | 2.8370  | H | -11.2884 | 6.4659  | 3.5652 |
| H | -9.4490 | -0.7336 | 1.7352  | H | -11.4036 | 4.9434  | 4.4440 |
| C | -7.2918 | -3.3494 | 2.5470  | C | -8.9923  | 4.1798  | 4.3552 |
| H | -7.5218 | -3.9774 | 1.6783  | C | -8.3610  | 3.2664  | 3.5863 |
| H | -6.2241 | -3.4514 | 2.7701  | H | -7.8692  | 2.4012  | 4.0107 |
| H | -7.8544 | -3.7303 | 3.4049  | C | -9.7011  | 3.1263  | 1.3973 |
| C | -7.8543 | 3.9048  | 8.9235  | H | -9.6927  | 3.8272  | 0.5607 |
| H | -7.8130 | 4.6175  | 9.7554  | H | -9.6777  | 2.1101  | 1.0087 |
| H | -8.1448 | 4.4475  | 8.0185  | C | -9.2436  | 3.9522  | 5.7947 |
| H | -8.6339 | 3.1658  | 9.1461  | C | -9.7340  | 2.4624  | 7.6546 |
| C | -5.4098 | 4.2855  | 8.4064  | H | -9.9536  | 1.4625  | 8.0199 |
| H | -5.3135 | 4.9938  | 9.2376  | C | -9.5235  | 2.6664  | 6.2904 |
| H | -4.4309 | 3.8200  | 8.2422  | H | -9.6139  | 1.8372  | 5.5970 |
| H | -5.6737 | 4.8429  | 7.5040  | C | -8.6222  | 6.2878  | 3.1564 |
| C | -6.0896 | 2.4727  | 10.0255 | C | -9.0638  | 7.2061  | 2.1866 |
| H | -6.8396 | 1.7205  | 10.2897 | H | -10.1007 | 7.2278  | 1.8728 |
| H | -5.1269 | 1.9635  | 9.9093  | C | -8.1732  | 8.1151  | 1.6057 |
| H | -6.0044 | 3.1815  | 10.8572 | H | -8.5525  | 8.8068  | 0.8562 |

### H\_<sub>2</sub>-Piv-Me-Me

Energy (POTENTIAL) = -3326.9964355 Eh

| Atom | X        | Y       | Z      |
|------|----------|---------|--------|
| S    | -6.9764  | 3.1738  | 1.3266 |
| O    | -7.1341  | 2.0554  | 0.3476 |
| O    | -5.8642  | 3.1330  | 2.2815 |
| N    | -10.8706 | 3.3403  | 2.1742 |
| N    | -8.3956  | 3.3662  | 2.1751 |
| C    | -12.3880 | 0.1964  | 4.6304 |
| C    | -11.1697 | 0.0726  | 3.9459 |
| H    | -10.6019 | -0.8519 | 4.0176 |
| C    | -10.6516 | 1.1084  | 3.1743 |
| H    | -9.6904  | 0.9597  | 2.7072 |
| C    | -11.3584 | 2.3181  | 3.0133 |
| C    | -12.5764 | 2.4529  | 3.7052 |
| H    | -13.1558 | 3.3660  | 3.6332 |
| C    | -13.0691 | 1.4109  | 4.4945 |
| H    | -14.0139 | 1.5552  | 5.0143 |
| C    | -11.3685 | 4.7113  | 2.2889 |
| H    | -12.4619 | 4.7258  | 2.2182 |
| H    | -10.9913 | 5.2544  | 1.4204 |
| C    | -10.9345 | 5.4297  | 3.5834 |
| H    | -11.2884 | 6.4659  | 3.5652 |
| H    | -11.4036 | 4.9434  | 4.4440 |
| C    | -8.9923  | 4.1798  | 4.3552 |
| C    | -8.3610  | 3.2664  | 3.5863 |
| H    | -7.8692  | 2.4012  | 4.0107 |
| C    | -9.7011  | 3.1263  | 1.3973 |
| H    | -9.6927  | 3.8272  | 0.5607 |
| H    | -9.6777  | 2.1101  | 1.0087 |
| C    | -9.2436  | 3.9522  | 5.7947 |
| C    | -9.7340  | 2.4624  | 7.6546 |
| H    | -9.9536  | 1.4625  | 8.0199 |
| C    | -9.5235  | 2.6664  | 6.2904 |
| H    | -9.6139  | 1.8372  | 5.5970 |
| C    | -8.6222  | 6.2878  | 3.1564 |
| C    | -9.0638  | 7.2061  | 2.1866 |
| H    | -10.1007 | 7.2278  | 1.8728 |
| C    | -8.1732  | 8.1151  | 1.6057 |
| H    | -8.5525  | 8.8068  | 0.8562 |
| C    | -6.8198  | 8.1527  | 1.9513 |
| C    | -6.3865  | 7.2361  | 2.9257 |
| C    | -7.2563  | 6.3285  | 3.5172 |
| H    | -6.8804  | 5.6373  | 4.2631 |
| C    | -9.2250  | 5.0351  | 6.6920 |
| H    | -9.0312  | 6.0340  | 6.3120 |
| C    | -9.4389  | 4.8292  | 8.0543 |
| H    | -9.4107  | 5.6735  | 8.7382 |
| C    | -9.6887  | 3.5414  | 8.5417 |
| H    | -5.3416  | 7.2338  | 3.2300 |

|    |          |         |         |   |          |         |         |
|----|----------|---------|---------|---|----------|---------|---------|
| N  | -9.4917  | 5.3978  | 3.8058  | H | -2.1390  | -3.5974 | 1.9974  |
| H  | -9.8606  | 3.3838  | 9.6032  | H | -3.6220  | -3.5322 | 2.9712  |
| C  | -6.8559  | 4.6490  | 0.3133  | H | -3.6594  | -4.2478 | 1.3512  |
| H  | -7.7744  | 4.7629  | -0.2661 | C | -5.7977  | -2.6989 | -3.2352 |
| H  | -6.7015  | 5.5014  | 0.9752  | H | -5.5817  | -2.9146 | -4.2883 |
| H  | -6.0030  | 4.5098  | -0.3564 | H | -5.0189  | -2.0259 | -2.8573 |
| C  | -12.9122 | -0.9267 | 5.4930  | H | -5.7463  | -3.6373 | -2.6727 |
| H  | -13.9472 | -0.7458 | 5.8030  | C | -8.2741  | -3.0253 | -3.6285 |
| H  | -12.8817 | -1.8865 | 4.9623  | H | -9.2773  | -2.5957 | -3.5219 |
| H  | -12.3102 | -1.0464 | 6.4043  | H | -8.1037  | -3.2306 | -4.6918 |
| C  | -5.8563  | 9.1272  | 1.3168  | H | -8.2505  | -3.9733 | -3.0840 |
| H  | -5.4195  | 9.8054  | 2.0620  | C | -7.2468  | -0.7379 | -3.8988 |
| H  | -5.0200  | 8.6079  | 0.8307  | H | -7.0868  | -0.9425 | -4.9639 |
| H  | -6.3520  | 9.7428  | 0.5582  | H | -8.2195  | -0.2451 | -3.7874 |
| Rh | -7.4281  | -0.2361 | 0.8344  | H | -6.4745  | -0.0399 | -3.5627 |
| Rh | -7.8579  | -2.5890 | 1.1585  | C | -11.6323 | -1.6370 | -1.4146 |
| O  | -9.4585  | -0.0202 | 0.4697  | H | -11.3826 | -2.6947 | -1.2843 |
| O  | -9.8761  | -2.1979 | 0.8990  | H | -12.6213 | -1.5666 | -1.8825 |
| O  | -5.8092  | -2.8370 | 1.3465  | H | -10.8995 | -1.1914 | -2.0988 |
| O  | -5.4189  | -0.6237 | 1.0884  | C | -12.0168 | 0.5775  | -0.2727 |
| O  | -7.2446  | -0.6145 | -1.1815 | H | -13.0226 | 0.6388  | -0.7048 |
| O  | -7.7043  | -2.8105 | -0.8921 | H | -12.0174 | 1.1298  | 0.6708  |
| O  | -7.5003  | -0.0206 | 2.9183  | H | -11.3190 | 1.0691  | -0.9575 |
| O  | -7.9161  | -2.2235 | 3.1985  | C | -12.6479 | -1.5646 | 0.9009  |
| C  | -10.2228 | -1.0388 | 0.5020  | H | -12.6616 | -1.0560 | 1.8710  |
| C  | -7.5630  | -1.0772 | 3.6281  | H | -13.6561 | -1.5121 | 0.4734  |
| C  | -5.0395  | -1.8263 | 1.2721  | H | -12.3969 | -2.6164 | 1.0664  |
| C  | -7.4152  | -1.8006 | -1.6123 | C | -6.0106  | -2.0640 | 5.2790  |
| C  | -7.1366  | -1.0182 | 5.1041  | H | -5.6616  | -2.0580 | 6.3180  |
| C  | -3.5270  | -2.0641 | 1.3540  | H | -6.3619  | -3.0700 | 5.0335  |
| C  | -7.1981  | -2.0543 | -3.1086 | H | -5.1554  | -1.8323 | 4.6320  |
| C  | -11.6440 | -0.8958 | -0.0558 | C | -6.6051  | 0.3685  | 5.4879  |
| C  | -2.8787  | -0.9587 | 2.2079  | H | -7.3936  | 1.1227  | 5.4613  |
| H  | -1.7949  | -1.1159 | 2.2560  | H | -6.2140  | 0.3385  | 6.5118  |
| H  | -3.0672  | 0.0317  | 1.7844  | H | -5.8005  | 0.6897  | 4.8192  |
| H  | -3.2700  | -0.9700 | 3.2325  | C | -8.3409  | -1.3937 | 5.9904  |
| C  | -2.9993  | -1.9887 | -0.0978 | H | -8.0325  | -1.4171 | 7.0422  |
| H  | -1.9171  | -2.1647 | -0.1088 | H | -9.1476  | -0.6596 | 5.8897  |
| H  | -3.4757  | -2.7477 | -0.7298 | H | -8.7350  | -2.3793 | 5.7232  |
| H  | -3.1937  | -1.0033 | -0.5346 |   |          |         |         |
| C  | -3.2238  | -3.4454 | 1.9539  |   |          |         |         |

**C-D-ts-Piv-Me-Me****Energy (POTENTIAL) = -3326.9633245 Eh**

| Atom | X        | Y       | Z       |
|------|----------|---------|---------|
| S    | -8.5112  | 4.5939  | 2.1534  |
| O    | -8.8576  | 6.0271  | 2.2263  |
| O    | -9.6235  | 3.6515  | 1.9526  |
| N    | -9.3020  | 6.8956  | 5.1077  |
| N    | -7.6718  | 4.0450  | 3.4947  |
| C    | -13.0504 | 5.0558  | 4.2989  |
| C    | -12.8962 | 6.4457  | 4.2469  |
| H    | -13.7511 | 7.0737  | 4.0095  |
| C    | -11.6622 | 7.0490  | 4.4992  |
| H    | -11.5778 | 8.1302  | 4.4699  |
| C    | -10.5549 | 6.2544  | 4.8044  |
| C    | -10.6820 | 4.8614  | 4.8489  |
| H    | -9.8155  | 4.2300  | 5.0097  |
| C    | -11.9205 | 4.2812  | 4.6051  |
| H    | -12.0029 | 3.1995  | 4.6187  |
| C    | -8.9158  | 8.1206  | 4.3447  |
| H    | -9.3429  | 8.9972  | 4.8445  |
| H    | -9.3611  | 8.0093  | 3.3591  |
| C    | -7.3930  | 8.2789  | 4.2171  |
| H    | -7.2241  | 9.1385  | 3.5650  |
| H    | -6.9582  | 8.5552  | 5.1871  |
| C    | -6.4427  | 6.0328  | 4.5744  |
| C    | -6.8749  | 4.7286  | 4.3445  |
| H    | -6.4489  | 4.0331  | 5.0569  |
| C    | -8.4730  | 6.4024  | 5.9871  |
| H    | -8.7279  | 5.4844  | 6.5021  |
| H    | -7.6906  | 7.0164  | 6.4036  |
| C    | -5.4344  | 6.2482  | 5.6501  |
| C    | -3.5257  | 7.4946  | 6.5296  |
| H    | -2.7994  | 8.2942  | 6.4068  |
| C    | -4.4870  | 7.2850  | 5.5389  |
| H    | -4.4910  | 7.9155  | 4.6557  |
| C    | -6.0390  | 7.1643  | 2.4397  |
| C    | -6.5352  | 7.9400  | 1.3751  |
| H    | -7.4614  | 8.4910  | 1.4947  |
| C    | -5.8814  | 7.9605  | 0.1443  |
| H    | -6.3009  | 8.5609  | -0.6608 |
| C    | -4.7208  | 7.2096  | -0.0924 |
| C    | -4.2385  | 6.4295  | 0.9678  |
| C    | -4.8728  | 6.4065  | 2.2093  |
| H    | -4.4679  | 5.7885  | 3.0032  |
| C    | -5.4036  | 5.4632  | 6.8233  |
| H    | -6.1438  | 4.6831  | 6.9682  |
| C    | -4.4386  | 5.6674  | 7.8074  |
| H    | -4.4393  | 5.0359  | 8.6924  |
| C    | -3.4878  | 6.6837  | 7.6665  |
| H    | -3.3434  | 5.8270  | 0.8263  |
| N    | -6.6862  | 7.1203  | 3.6840  |
| H    | -2.7382  | 6.8469  | 8.4359  |
| C    | -7.3621  | 4.3418  | 0.7934  |
| H    | -6.4830  | 4.9689  | 0.9330  |
| H    | -7.0964  | 3.2842  | 0.7931  |
| H    | -7.8877  | 4.6162  | -0.1258 |
| C    | -14.3772 | 4.3924  | 4.0223  |
| H    | -14.7518 | 3.8701  | 4.9123  |
| H    | -15.1356 | 5.1196  | 3.7150  |
| H    | -14.2844 | 3.6419  | 3.2276  |
| C    | -4.0104  | 7.2527  | -1.4249 |
| H    | -3.5004  | 6.3061  | -1.6381 |
| H    | -4.7080  | 7.4532  | -2.2464 |
| H    | -3.2467  | 8.0431  | -1.4498 |
| Rh   | -7.4317  | 1.8295  | 3.8146  |
| Rh   | -6.9110  | -0.4837 | 4.3746  |
| O    | -9.4284  | 1.2833  | 3.8072  |
| O    | -8.9368  | -0.8880 | 4.2263  |
| O    | -4.9107  | 0.0859  | 4.5133  |
| O    | -5.3992  | 2.2107  | 3.9108  |
| O    | -7.2108  | 1.3087  | 1.8243  |
| O    | -6.6702  | -0.8275 | 2.3413  |
| O    | -7.5932  | 2.1976  | 5.8483  |
| O    | -7.1711  | 0.0366  | 6.3708  |
| C    | -9.7475  | 0.0719  | 4.0222  |
| C    | -7.4311  | 1.2420  | 6.6764  |
| C    | -4.5927  | 1.2913  | 4.2700  |
| C    | -6.8521  | 0.1238  | 1.5197  |
| C    | -7.4949  | 1.5958  | 8.1685  |
| C    | -3.1277  | 1.7212  | 4.4255  |
| C    | -6.5962  | -0.1378 | 0.0295  |
| C    | -11.2510 | -0.2308 | 4.0982  |

|   |          |         |         |   |         |         |         |
|---|----------|---------|---------|---|---------|---------|---------|
| C | -3.0807  | 2.8042  | 5.5258  | H | -9.3675 | 2.7161  | 8.0046  |
| H | -2.0476  | 3.1388  | 5.6779  | H | -8.4199 | 3.0671  | 9.4654  |
| H | -3.6875  | 3.6715  | 5.2522  | H | -7.9176 | 3.7285  | 7.8995  |
| H | -3.4549  | 2.4138  | 6.4802  | C | -8.0776 | 0.4154  | 8.9636  |
| C | -2.6585  | 2.3198  | 3.0826  | H | -8.0915 | 0.6587  | 10.0325 |
| H | -1.6185  | 2.6570  | 3.1662  | H | -9.1059 | 0.1986  | 8.6503  |
| H | -2.7103  | 1.5738  | 2.2799  | H | -7.4821 | -0.4904 | 8.8224  |
| H | -3.2778  | 3.1750  | 2.7949  |   |         |         |         |
| C | -2.2423  | 0.5303  | 4.8158  |   |         |         |         |
| H | -1.2027  | 0.8626  | 4.9217  |   |         |         |         |
| H | -2.5613  | 0.0933  | 5.7676  |   |         |         |         |
| H | -2.2750  | -0.2567 | 4.0550  |   |         |         |         |
| C | -5.3545  | 0.6920  | -0.3682 |   |         |         |         |
| H | -5.1267  | 0.5364  | -1.4294 |   |         |         |         |
| H | -5.5230  | 1.7609  | -0.2037 |   |         |         |         |
| H | -4.4767  | 0.3893  | 0.2162  |   |         |         |         |
| C | -7.8256  | 0.3329  | -0.7736 |   |         |         |         |
| H | -7.6545  | 0.1689  | -1.8442 |   |         |         |         |
| H | -8.7224  | -0.2279 | -0.4829 |   |         |         |         |
| H | -8.0232  | 1.3965  | -0.6116 |   |         |         |         |
| C | -6.3343  | -1.6282 | -0.2285 |   |         |         |         |
| H | -5.4610  | -1.9817 | 0.3286  |   |         |         |         |
| H | -7.1935  | -2.2400 | 0.0671  |   |         |         |         |
| H | -6.1497  | -1.7902 | -1.2972 |   |         |         |         |
| C | -11.7162 | 0.2703  | 5.4853  |   |         |         |         |
| H | -12.7938 | 0.1048  | 5.6029  |   |         |         |         |
| H | -11.1992 | -0.2669 | 6.2899  |   |         |         |         |
| H | -11.5141 | 1.3391  | 5.6069  |   |         |         |         |
| C | -11.9851 | 0.5327  | 2.9804  |   |         |         |         |
| H | -11.6677 | 0.1771  | 1.9923  |   |         |         |         |
| H | -13.0669 | 0.3743  | 3.0666  |   |         |         |         |
| H | -11.7793 | 1.6043  | 3.0296  |   |         |         |         |
| C | -11.5180 | -1.7382 | 3.9734  |   |         |         |         |
| H | -12.5965 | -1.9275 | 4.0342  |   |         |         |         |
| H | -11.1581 | -2.1264 | 3.0139  |   |         |         |         |
| H | -11.0242 | -2.3004 | 4.7715  |   |         |         |         |
| C | -6.0360  | 1.8613  | 8.6098  |   |         |         |         |
| H | -6.0113  | 2.1343  | 9.6715  |   |         |         |         |
| H | -5.4163  | 0.9687  | 8.4695  |   |         |         |         |
| H | -5.5913  | 2.6811  | 8.0343  |   |         |         |         |
| C | -8.3513  | 2.8538  | 8.3921  |   |         |         |         |

  

| <b>D_-Piv-Me-Me</b>                          |          |        |        |
|----------------------------------------------|----------|--------|--------|
| <b>Energy (POTENTIAL) = -3326.9855089 Eh</b> |          |        |        |
| Atom                                         | X        | Y      | Z      |
| S                                            | -8.6173  | 4.8909 | 2.0338 |
| O                                            | -8.8573  | 6.3360 | 2.0365 |
| O                                            | -9.7731  | 3.9926 | 2.0041 |
| N                                            | -9.2115  | 6.9720 | 4.9799 |
| N                                            | -7.6514  | 4.2886 | 3.3737 |
| C                                            | -12.7742 | 4.6505 | 4.7866 |
| C                                            | -12.7357 | 5.9827 | 4.3563 |
| H                                            | -13.6399 | 6.4433 | 3.9622 |
| C                                            | -11.5724 | 6.7486 | 4.4262 |
| H                                            | -11.6059 | 7.7836 | 4.1038 |
| C                                            | -10.3705 | 6.1992 | 4.9217 |
| C                                            | -10.4034 | 4.8554 | 5.3523 |
| H                                            | -9.5082  | 4.3538 | 5.7000 |
| C                                            | -11.5816 | 4.1166 | 5.2925 |
| H                                            | -11.5601 | 3.0846 | 5.6331 |
| C                                            | -9.0772  | 8.2275 | 4.2437 |
| H                                            | -9.5454  | 9.0676 | 4.7813 |
| H                                            | -9.5659  | 8.1198 | 3.2756 |
| C                                            | -7.5816  | 8.5401 | 4.0341 |
| H                                            | -7.4770  | 9.2692 | 3.2329 |
| H                                            | -7.1652  | 9.0125 | 4.9346 |
| C                                            | -6.7958  | 6.3349 | 4.7683 |
| C                                            | -6.9754  | 4.9042 | 4.2775 |
| H                                            | -6.4605  | 4.2027 | 4.9274 |
| C                                            | -8.0475  | 6.5980 | 5.7169 |
| H                                            | -8.2239  | 5.7165 | 6.3299 |
| H                                            | -7.7466  | 7.3965 | 6.4059 |
| C                                            | -5.5595  | 6.3954 | 5.6995 |
| C                                            | -3.5282  | 7.5054 | 6.4412 |
| H                                            | -2.7973  | 8.2988 | 6.3097 |

|    |          |         |         |   |          |         |         |
|----|----------|---------|---------|---|----------|---------|---------|
| C  | -4.6109  | 7.4158  | 5.5628  | C | -9.7815  | 0.2436  | 3.7809  |
| H  | -4.7092  | 8.1349  | 4.7573  | C | -7.5499  | 1.3918  | 6.5141  |
| C  | -6.0294  | 7.1964  | 2.5684  | C | -4.6288  | 1.4629  | 4.1177  |
| C  | -6.3112  | 7.9291  | 1.3942  | C | -6.8577  | 0.3220  | 1.3589  |
| H  | -7.1579  | 8.6046  | 1.3655  | C | -7.7012  | 1.6965  | 8.0097  |
| C  | -5.5518  | 7.7584  | 0.2420  | C | -3.1523  | 1.8700  | 4.1949  |
| H  | -5.8113  | 8.3366  | -0.6429 | C | -6.6180  | 0.0751  | -0.1348 |
| C  | -4.4834  | 6.8486  | 0.1799  | C | -11.2764 | -0.1013 | 3.7814  |
| C  | -4.2111  | 6.1166  | 1.3392  | C | -3.0258  | 2.9977  | 5.2414  |
| C  | -4.9560  | 6.2831  | 2.5096  | H | -1.9799  | 3.3161  | 5.3213  |
| H  | -4.6763  | 5.6991  | 3.3781  | H | -3.6301  | 3.8656  | 4.9642  |
| C  | -5.4154  | 5.4857  | 6.7597  | H | -3.3527  | 2.6561  | 6.2308  |
| H  | -6.1466  | 4.6974  | 6.9119  | C | -2.7422  | 2.3990  | 2.8030  |
| C  | -4.3344  | 5.5737  | 7.6382  | H | -1.6957  | 2.7256  | 2.8222  |
| H  | -4.2418  | 4.8519  | 8.4453  | H | -2.8400  | 1.6182  | 2.0385  |
| C  | -3.3808  | 6.5818  | 7.4783  | H | -3.3653  | 3.2483  | 2.5060  |
| H  | -3.3930  | 5.3996  | 1.3442  | C | -2.2718  | 0.6772  | 4.5905  |
| N  | -6.8041  | 7.3424  | 3.7246  | H | -1.2233  | 0.9940  | 4.6366  |
| H  | -2.5360  | 6.6498  | 8.1582  | H | -2.5543  | 0.2825  | 5.5721  |
| C  | -7.5018  | 4.4785  | 0.6935  | H | -2.3526  | -0.1366 | 3.8626  |
| H  | -6.5910  | 5.0692  | 0.7889  | C | -8.5215  | 2.9771  | 8.2320  |
| H  | -7.2944  | 3.4092  | 0.7443  | H | -8.6371  | 3.1549  | 9.3076  |
| H  | -8.0332  | 4.7360  | -0.2274 | H | -8.0337  | 3.8536  | 7.7964  |
| C  | -14.0283 | 3.8168  | 4.6707  | H | -9.5207  | 2.8917  | 7.7914  |
| H  | -14.9278 | 4.4091  | 4.8789  | C | -6.2680  | 1.8801  | 8.5612  |
| H  | -14.1426 | 3.4019  | 3.6597  | H | -6.3069  | 2.1049  | 9.6335  |
| H  | -14.0134 | 2.9706  | 5.3671  | H | -5.6739  | 0.9709  | 8.4200  |
| C  | -3.6886  | 6.6628  | -1.0905 | H | -5.7543  | 2.7072  | 8.0572  |
| H  | -3.3058  | 7.6186  | -1.4705 | C | -8.3874  | 0.5073  | 8.7068  |
| H  | -2.8324  | 5.9981  | -0.9319 | H | -8.4876  | 0.7142  | 9.7784  |
| H  | -4.3034  | 6.2257  | -1.8891 | H | -9.3904  | 0.3378  | 8.2967  |
| Rh | -7.4657  | 2.0050  | 3.6649  | H | -7.8098  | -0.4128 | 8.5835  |
| Rh | -6.9545  | -0.3024 | 4.2062  | C | -5.4329  | 0.9675  | -0.5655 |
| O  | -9.4557  | 1.4520  | 3.5635  | H | -5.2247  | 0.8192  | -1.6315 |
| O  | -8.9735  | -0.7064 | 4.0450  | H | -5.6529  | 2.0267  | -0.4001 |
| O  | -4.9504  | 0.2543  | 4.3345  | H | -4.5254  | 0.7147  | -0.0031 |
| O  | -5.4445  | 2.4006  | 3.8268  | C | -7.8935  | 0.4841  | -0.9015 |
| O  | -7.1889  | 1.5125  | 1.6806  | H | -7.7473  | 0.3241  | -1.9762 |
| O  | -6.7044  | -0.6400 | 2.1720  | H | -8.7538  | -0.1168 | -0.5821 |
| O  | -7.7075  | 2.3564  | 5.6934  | H | -8.1345  | 1.5388  | -0.7375 |
| O  | -7.2329  | 0.2030  | 6.1960  | C | -6.2900  | -1.4007 | -0.4006 |



|   |          |         |         |   |          |         |         |
|---|----------|---------|---------|---|----------|---------|---------|
| H | -6.1207  | -1.5520 | -1.4732 | C | -8.7957  | 4.3881  | 0.1919  |
| H | -5.3879  | -1.7111 | 0.1363  | H | -9.1049  | 4.9831  | -0.6739 |
| H | -7.1111  | -2.0540 | -0.0876 | C | -11.0823 | 4.0707  | 0.8679  |
| C | -12.0823 | 0.9770  | 3.0410  | H | -11.2366 | 4.4594  | -0.1446 |
| H | -13.1494 | 0.7279  | 3.0782  | H | -11.0255 | 2.9863  | 0.8075  |
| H | -11.9362 | 1.9633  | 3.4861  | C | -9.3187  | 3.8572  | 2.6816  |
| H | -11.7817 | 1.0384  | 1.9889  | C | -9.0723  | 1.7353  | 3.8490  |
| C | -11.7049 | -0.1649 | 5.2659  | H | -9.0164  | 0.6516  | 3.8117  |
| H | -12.7731 | -0.4023 | 5.3349  | C | -9.2184  | 2.4561  | 2.6647  |
| H | -11.1438 | -0.9363 | 5.8049  | H | -9.2734  | 1.9184  | 1.7242  |
| H | -11.5370 | 0.7947  | 5.7687  | C | -8.6401  | 6.8904  | 1.5570  |
| C | -11.4918 | -1.4729 | 3.1167  | C | -8.7149  | 8.2405  | 1.1629  |
| H | -12.5591 | -1.7238 | 3.1254  | H | -9.6589  | 8.6498  | 0.8165  |
| H | -11.1540 | -1.4610 | 2.0733  | C | -7.5899  | 9.0618  | 1.1919  |
| H | -10.9470 | -2.2618 | 3.6429  | H | -7.6900  | 10.1014 | 0.8869  |

**t-D-Piv-Me-Me**

**Energy (POTENTIAL) = -3326.9823836 Eh**

| Atom | X        | Y      | Z       |    |          |         |         |
|------|----------|--------|---------|----|----------|---------|---------|
| S    | -7.2475  | 3.3124 | -1.5119 | C  | -6.3352  | 8.5785  | 1.5899  |
| O    | -8.0310  | 4.1049 | -2.4813 | C  | -6.2570  | 7.2273  | 1.9515  |
| O    | -7.1658  | 1.8557 | -1.7003 | C  | -7.3795  | 6.3977  | 1.9452  |
| N    | -12.2022 | 4.4997 | 1.6803  | H  | -7.2604  | 5.3774  | 2.2839  |
| N    | -7.8481  | 3.5324 | 0.1060  | C  | -9.2141  | 4.5116  | 3.9153  |
| C    | -13.4013 | 2.2258 | 5.0907  | H  | -9.2423  | 5.5925  | 3.9603  |
| C    | -13.0722 | 1.6168 | 3.8691  | C  | -9.0747  | 3.7914  | 5.1035  |
| H    | -13.1329 | 0.5341 | 3.7782  | H  | -9.0149  | 4.3252  | 6.0478  |
| C    | -12.6794 | 2.3616 | 2.7630  | C  | -9.0222  | 2.3982  | 5.0778  |
| H    | -12.4589 | 1.8474 | 1.8326  | H  | -5.3100  | 6.7979  | 2.2655  |
| C    | -12.5757 | 3.7674 | 2.8301  | N  | -9.8119  | 6.0861  | 1.5225  |
| C    | -12.9187 | 4.3822 | 4.0471  | H  | -8.9389  | 1.8353  | 6.0032  |
| H    | -12.8504 | 5.4577 | 4.1616  | C  | -5.6085  | 4.0148  | -1.4038 |
| C    | -13.3273 | 3.6204 | 5.1452  | H  | -5.6960  | 5.0405  | -1.0446 |
| H    | -13.5759 | 4.1337 | 6.0719  | H  | -5.0111  | 3.4097  | -0.7259 |
| C    | -12.2882 | 5.9568 | 1.6580  | H  | -5.1988  | 3.9919  | -2.4176 |
| H    | -13.1589 | 6.2956 | 2.2236  | C  | -13.7863 | 1.4007  | 6.2954  |
| H    | -12.4354 | 6.2567 | 0.6125  | H  | -14.2804 | 2.0113  | 7.0594  |
| C    | -11.0176 | 6.6149 | 2.1912  | H  | -14.4657 | 0.5830  | 6.0250  |
| H    | -11.0754 | 7.6879 | 2.0049  | H  | -12.9042 | 0.9414  | 6.7633  |
| H    | -10.9593 | 6.4765 | 3.2785  | C  | -5.1171  | 9.4712  | 1.6163  |
| C    | -9.6796  | 4.6238 | 1.4003  | H  | -4.4121  | 9.2146  | 0.8153  |
|      |          |        |         | H  | -5.3916  | 10.5243 | 1.4907  |
|      |          |        |         | H  | -4.5725  | 9.3769  | 2.5636  |
|      |          |        |         | Rh | -5.0003  | 3.0510  | 2.2454  |
|      |          |        |         | Rh | -2.8449  | 2.6731  | 3.2583  |

|   |         |         |         |   |         |         |         |
|---|---------|---------|---------|---|---------|---------|---------|
| O | -5.6699 | 1.3845  | 3.2701  | H | -0.5177 | 6.5389  | -0.4729 |
| O | -3.6455 | 1.0295  | 4.2094  | H | -0.2658 | 5.3361  | 0.8108  |
| O | -2.1348 | 4.3034  | 2.2204  | H | -1.1303 | 4.8852  | -0.6715 |
| O | -4.1439 | 4.6690  | 1.2538  | C | -3.2549 | 6.6566  | -0.3897 |
| O | -4.3912 | 1.8286  | 0.7003  | H | -4.2243 | 6.9426  | 0.0258  |
| O | -2.3624 | 1.4822  | 1.6314  | H | -2.8103 | 7.5349  | -0.8718 |
| O | -5.4617 | 4.2756  | 3.8405  | H | -3.4270 | 5.8990  | -1.1616 |
| O | -3.4461 | 3.9097  | 4.7961  | C | -2.0395 | 7.2247  | 1.7557  |
| C | -4.8586 | 0.7129  | 3.9862  | H | -1.6081 | 8.1114  | 1.2770  |
| C | -4.6087 | 4.4312  | 4.7728  | H | -2.9676 | 7.5261  | 2.2537  |
| C | -2.9131 | 4.9376  | 1.4367  | H | -1.3397 | 6.8676  | 2.5181  |
| C | -3.2070 | 1.3555  | 0.6883  | C | -1.6438 | -0.3609 | -0.2958 |
| C | -5.0371 | 5.2482  | 5.9955  | H | -1.3241 | -0.8419 | -1.2276 |
| C | -2.3030 | 6.1324  | 0.6947  | H | -0.7730 | 0.1182  | 0.1609  |
| C | -2.7539 | 0.6582  | -0.5968 | H | -1.9999 | -1.1419 | 0.3861  |
| C | -5.3977 | -0.5541 | 4.6596  | C | -3.9473 | -0.0322 | -1.2795 |
| C | -3.8178 | 5.9418  | 6.6259  | H | -4.7521 | 0.6740  | -1.5007 |
| H | -4.1346 | 6.5173  | 7.5034  | H | -3.6159 | -0.4917 | -2.2180 |
| H | -3.0645 | 5.2153  | 6.9432  | H | -4.3595 | -0.8230 | -0.6413 |
| H | -3.3478 | 6.6337  | 5.9169  | C | -2.2042 | 1.7866  | -1.5043 |
| C | -6.0967 | 6.2903  | 5.6021  | H | -1.3609 | 2.2997  | -1.0276 |
| H | -6.9710 | 5.8184  | 5.1488  | H | -1.8559 | 1.3611  | -2.4526 |
| H | -6.4190 | 6.8389  | 6.4951  | H | -2.9791 | 2.5287  | -1.7271 |
| H | -5.6955 | 7.0140  | 4.8840  |   |         |         |         |
| C | -5.6413 | 4.2262  | 6.9882  |   |         |         |         |
| H | -4.8979 | 3.4749  | 7.2783  |   |         |         |         |
| H | -5.9783 | 4.7451  | 7.8934  |   |         |         |         |
| H | -6.4997 | 3.7101  | 6.5450  |   |         |         |         |
| C | -4.2414 | -1.4719 | 5.0869  |   |         |         |         |
| H | -3.5768 | -0.9745 | 5.7990  |   |         |         |         |
| H | -4.6459 | -2.3725 | 5.5635  |   |         |         |         |
| H | -3.6421 | -1.7823 | 4.2235  |   |         |         |         |
| C | -6.3250 | -1.2971 | 3.6797  |   |         |         |         |
| H | -6.7240 | -2.1981 | 4.1600  |   |         |         |         |
| H | -7.1629 | -0.6681 | 3.3690  |   |         |         |         |
| H | -5.7795 | -1.6048 | 2.7791  |   |         |         |         |
| C | -6.1919 | -0.0907 | 5.9010  |   |         |         |         |
| H | -7.0045 | 0.5823  | 5.6156  |   |         |         |         |
| H | -6.6217 | -0.9601 | 6.4128  |   |         |         |         |
| H | -5.5424 | 0.4370  | 6.6096  |   |         |         |         |
| C | -0.9715 | 5.6919  | 0.0547  |   |         |         |         |

  

| <b>t-D-E-ts-Piv-Me-Me</b>                    |         |         |         |
|----------------------------------------------|---------|---------|---------|
| <b>Energy (POTENTIAL) = -3326.9571731 Eh</b> |         |         |         |
| Atom                                         | X       | Y       | Z       |
| N                                            | -6.3891 | 0.4471  | -7.4225 |
| N                                            | -3.4353 | -1.2705 | -6.1497 |
| N                                            | -2.1813 | 1.2129  | -5.7623 |
| C                                            | -5.2975 | -0.2976 | -7.1946 |
| H                                            | -4.6973 | -0.5256 | -8.0765 |
| C                                            | -5.5545 | -2.2126 | -6.5897 |
| C                                            | -6.3259 | -3.1613 | -7.3232 |
| H                                            | -7.3970 | -2.9961 | -7.3702 |
| C                                            | -5.7497 | -4.2715 | -7.9071 |
| C                                            | -4.3547 | -4.4728 | -7.7012 |
| C                                            | -3.5521 | -3.5747 | -7.0230 |
| H                                            | -2.4892 | -3.7663 | -6.9306 |
| C                                            | -4.1278 | -2.3824 | -6.5217 |
| C                                            | -2.0129 | -1.2312 | -5.8117 |

|   |         |         |         |    |          |         |          |
|---|---------|---------|---------|----|----------|---------|----------|
| H | -1.8887 | -1.3557 | -4.7289 | H  | -6.2973  | -6.3038 | -8.4157  |
| H | -1.5035 | -2.0572 | -6.3106 | C  | -7.7089  | -0.0674 | -9.8603  |
| C | -1.3733 | 0.0847  | -6.2386 | H  | -7.3881  | -1.1064 | -9.7730  |
| H | -1.2785 | 0.1193  | -7.3384 | H  | -8.6743  | 0.0857  | -9.3887  |
| H | -0.3697 | 0.1327  | -5.8126 | H  | -7.7264  | 0.2406  | -10.9093 |
| C | -1.5140 | 2.4620  | -5.6558 | H  | -6.0755  | -1.7548 | -5.7514  |
| C | -0.4333 | 2.5764  | -4.7590 | Rh | -10.7750 | 0.2555  | -5.3220  |
| H | -0.1406 | 1.7124  | -4.1683 | Rh | -8.5677  | 0.3450  | -6.3315  |
| C | 0.2383  | 3.7832  | -4.6013 | O  | -9.9999  | -0.9966 | -3.8855  |
| H | 1.0651  | 3.8414  | -3.8960 | O  | -7.9538  | -1.0081 | -4.8450  |
| C | -0.1417 | 4.9329  | -5.3155 | O  | -9.4352  | 1.5082  | -7.8045  |
| C | 0.5844  | 6.2421  | -5.1147 | O  | -11.4791 | 1.4682  | -6.8445  |
| H | 1.6573  | 6.1432  | -5.3254 | O  | -11.1593 | -1.4061 | -6.4984  |
| H | 0.1864  | 7.0257  | -5.7683 | O  | -9.0963  | -1.3458 | -7.4221  |
| H | 0.4946  | 6.5942  | -4.0786 | O  | -10.3071 | 1.9563  | -4.2542  |
| C | -1.2199 | 4.8155  | -6.1971 | O  | -8.2975  | 2.1193  | -5.2776  |
| H | -1.5401 | 5.6839  | -6.7690 | C  | -8.8222  | -1.4606 | -4.0311  |
| C | -1.8939 | 3.6026  | -6.3788 | C  | -9.2273  | 2.5724  | -4.5389  |
| H | -2.7097 | 3.5584  | -7.0929 | C  | -10.6705 | 1.8117  | -7.7632  |
| C | -3.4738 | 1.1950  | -6.4286 | C  | -10.2709 | -1.8292 | -7.3021  |
| H | -4.0568 | 2.0694  | -6.1420 | C  | -9.0804  | 3.9912  | -3.9691  |
| H | -3.3623 | 1.2099  | -7.5261 | C  | -11.1987 | 2.7041  | -8.8940  |
| C | -4.2787 | -0.0724 | -6.0153 | C  | -10.6280 | -3.0469 | -8.1663  |
| C | -4.8286 | 0.0965  | -4.5970 | C  | -8.4739  | -2.6673 | -3.1459  |
| C | -4.4376 | -0.7628 | -3.5609 | C  | -9.2649  | 3.9373  | -2.4392  |
| H | -3.8046 | -1.6170 | -3.7705 | H  | -9.1953  | 4.9489  | -2.0224  |
| C | -4.8630 | -0.5464 | -2.2482 | H  | -10.2424 | 3.5215  | -2.1767  |
| H | -4.5413 | -1.2241 | -1.4618 | H  | -8.4938  | 3.3217  | -1.9619  |
| C | -5.7039 | 0.5276  | -1.9531 | C  | -10.2087 | 4.8415  | -4.5961  |
| H | -6.0391 | 0.7002  | -0.9338 | H  | -10.1726 | 5.8601  | -4.1920  |
| C | -6.1159 | 1.3746  | -2.9840 | H  | -10.0938 | 4.9036  | -5.6838  |
| H | -6.7900 | 2.1971  | -2.7741 | H  | -11.1922 | 4.4146  | -4.3771  |
| C | -5.6711 | 1.1709  | -4.2892 | C  | -7.7192  | 4.6036  | -4.3314  |
| H | -6.0089 | 1.8375  | -5.0714 | H  | -6.8872  | 4.0366  | -3.9047  |
| S | -6.4732 | 0.9599  | -9.0569 | H  | -7.5778  | 4.6393  | -5.4162  |
| O | -6.9215 | 2.3613  | -9.0348 | H  | -7.6651  | 5.6277  | -3.9434  |
| O | -5.1951 | 0.6690  | -9.7514 | C  | -7.1334  | -3.2933 | -3.5494  |
| H | -3.8934 | -5.3667 | -8.1158 | H  | -6.3190  | -2.5706 | -3.4784  |
| C | -6.5462 | -5.2754 | -8.7047 | H  | -6.9075  | -4.1345 | -2.8830  |
| H | -7.6217 | -5.1346 | -8.5632 | H  | -7.1648  | -3.6728 | -4.5759  |
| H | -6.3376 | -5.1852 | -9.7795 | C  | -9.5991  | -3.7112 | -3.3116  |

|   |          |         |          |   |         |         |         |
|---|----------|---------|----------|---|---------|---------|---------|
| H | -9.3753  | -4.5943 | -2.7014  | C | -6.1900 | -2.7205 | -7.7406 |
| H | -10.5660 | -3.3078 | -2.9985  | H | -7.0207 | -2.3674 | -8.3389 |
| H | -9.6853  | -4.0323 | -4.3566  | C | -5.7027 | -3.9813 | -7.8570 |
| C | -8.4215  | -2.1814 | -1.6819  | C | -4.6517 | -4.4063 | -6.9467 |
| H | -8.2175  | -3.0300 | -1.0179  | C | -4.0183 | -3.5806 | -6.0591 |
| H | -7.6278  | -1.4400 | -1.5435  | H | -3.1858 | -3.9330 | -5.4615 |
| H | -9.3732  | -1.7299 | -1.3831  | C | -4.4124 | -2.2115 | -6.0598 |
| C | -12.1254 | -3.0112 | -8.5202  | C | -2.5047 | -1.1567 | -4.8331 |
| H | -12.3800 | -3.8814 | -9.1363  | H | -2.7388 | -0.7929 | -3.8280 |
| H | -12.7488 | -3.0292 | -7.6221  | H | -2.1053 | -2.1683 | -4.7603 |
| H | -12.3741 | -2.1069 | -9.0885  | C | -1.4925 | -0.2253 | -5.5044 |
| C | -9.7894  | -3.0572 | -9.4552  | H | -1.1446 | -0.6845 | -6.4465 |
| H | -8.7190  | -3.0975 | -9.2437  | H | -0.6326 | -0.1258 | -4.8411 |
| H | -10.0531 | -3.9337 | -10.0583 | C | -1.2295 | 2.1868  | -5.9277 |
| H | -9.9799  | -2.1603 | -10.0561 | C | -0.2888 | 2.4813  | -4.9190 |
| C | -10.3210 | -4.3004 | -7.3145  | H | -0.2438 | 1.8576  | -4.0307 |
| H | -10.9441 | -4.3239 | -6.4139  | C | 0.5572  | 3.5789  | -5.0279 |
| H | -10.5288 | -5.2049 | -7.8983  | H | 1.2668  | 3.7800  | -4.2275 |
| H | -9.2706  | -4.3281 | -7.0044  | C | 0.5001  | 4.4452  | -6.1329 |
| C | -10.9501 | 4.1641  | -8.4508  | C | 1.4134  | 5.6447  | -6.2238 |
| H | -11.2913 | 4.8518  | -9.2337  | H | 2.4702  | 5.3485  | -6.1933 |
| H | -11.4979 | 4.3951  | -7.5307  | H | 1.2498  | 6.2042  | -7.1512 |
| H | -9.8836  | 4.3449  | -8.2762  | H | 1.2516  | 6.3349  | -5.3853 |
| C | -12.7025 | 2.4643  | -9.1023  | C | -0.4403 | 4.1547  | -7.1251 |
| H | -13.0705 | 3.1093  | -9.9088  | H | -0.5139 | 4.8008  | -7.9972 |
| H | -12.9014 | 1.4227  | -9.3817  | C | -1.2854 | 3.0431  | -7.0394 |
| H | -13.2729 | 2.6857  | -8.1957  | H | -1.9795 | 2.8520  | -7.8509 |
| C | -10.4269 | 2.4164  | -10.1937 | C | -3.2396 | 0.9492  | -6.6567 |
| H | -10.5747 | 1.3787  | -10.5169 | H | -3.6366 | 1.9179  | -6.9455 |
| H | -10.7935 | 3.0735  | -10.9911 | H | -2.9610 | 0.4342  | -7.5898 |
| H | -9.3549  | 2.5841  | -10.0628 | C | -4.3659 | 0.1378  | -5.9792 |

**E-Piv-Me-Me**

**Energy (POTENTIAL) = -3326.9773384 Eh**

| Atom | X       | Y       | Z       |
|------|---------|---------|---------|
| N    | -6.6346 | 0.5135  | -7.1734 |
| N    | -3.7539 | -1.1729 | -5.5980 |
| N    | -2.0992 | 1.0826  | -5.7621 |
| C    | -5.4494 | -0.3084 | -7.0629 |
| H    | -4.8952 | -0.3253 | -8.0078 |
| C    | -5.6911 | -1.7949 | -6.6921 |

|   |         |         |         |
|---|---------|---------|---------|
| C | -6.1900 | -2.7205 | -7.7406 |
| H | -7.0207 | -2.3674 | -8.3389 |
| C | -5.7027 | -3.9813 | -7.8570 |
| C | -4.6517 | -4.4063 | -6.9467 |
| C | -4.0183 | -3.5806 | -6.0591 |
| H | -3.1858 | -3.9330 | -5.4615 |
| C | -4.4124 | -2.2115 | -6.0598 |
| C | -2.5047 | -1.1567 | -4.8331 |
| H | -2.7388 | -0.7929 | -3.8280 |
| H | -2.1053 | -2.1683 | -4.7603 |
| C | -1.4925 | -0.2253 | -5.5044 |
| H | -1.1446 | -0.6845 | -6.4465 |
| H | -0.6326 | -0.1258 | -4.8411 |
| C | -1.2295 | 2.1868  | -5.9277 |
| C | -0.2888 | 2.4813  | -4.9190 |
| H | -0.2438 | 1.8576  | -4.0307 |
| C | 0.5572  | 3.5789  | -5.0279 |
| H | 1.2668  | 3.7800  | -4.2275 |
| C | 0.5001  | 4.4452  | -6.1329 |
| C | 1.4134  | 5.6447  | -6.2238 |
| H | 2.4702  | 5.3485  | -6.1933 |
| H | 1.2498  | 6.2042  | -7.1512 |
| H | 1.2516  | 6.3349  | -5.3853 |
| C | -0.4403 | 4.1547  | -7.1251 |
| H | -0.5139 | 4.8008  | -7.9972 |
| C | -1.2854 | 3.0431  | -7.0394 |
| H | -1.9795 | 2.8520  | -7.8509 |
| C | -3.2396 | 0.9492  | -6.6567 |
| H | -3.6366 | 1.9179  | -6.9455 |
| H | -2.9610 | 0.4342  | -7.5898 |
| C | -4.3659 | 0.1378  | -5.9792 |
| C | -4.9115 | 0.8264  | -4.7290 |
| C | -5.4042 | 0.0709  | -3.6564 |
| H | -5.4538 | -1.0080 | -3.7335 |
| C | -5.8165 | 0.6816  | -2.4711 |
| H | -6.1837 | 0.0693  | -1.6519 |
| C | -5.7338 | 2.0677  | -2.3324 |
| H | -6.0295 | 2.5465  | -1.4032 |
| C | -5.2685 | 2.8341  | -3.4031 |
| H | -5.2059 | 3.9151  | -3.3151 |
| C | -4.8719 | 2.2209  | -4.5919 |

|    |          |         |          |   |          |         |          |
|----|----------|---------|----------|---|----------|---------|----------|
| H  | -4.5119  | 2.8464  | -5.3997  | H | -10.7392 | 4.2273  | -7.3169  |
| S  | -6.5641  | 1.5845  | -8.4067  | H | -12.1160 | 4.6779  | -8.3439  |
| O  | -7.2912  | 2.8218  | -8.0590  | H | -12.3812 | 3.7022  | -6.8819  |
| O  | -5.1626  | 1.7622  | -8.8882  | C | -9.6445  | -3.0435 | -9.9256  |
| H  | -4.3224  | -5.4413 | -7.0123  | H | -8.5805  | -2.8376 | -9.7919  |
| C  | -6.1970  | -4.9736 | -8.8795  | H | -9.7457  | -3.9063 | -10.5944 |
| H  | -6.6557  | -5.8463 | -8.3975  | H | -10.0952 | -2.1753 | -10.4217 |
| H  | -6.9385  | -4.5252 | -9.5455  | C | -9.6662  | -4.5227 | -7.8650  |
| H  | -5.3668  | -5.3453 | -9.4937  | H | -10.1858 | -4.7550 | -6.9276  |
| C  | -7.4358  | 0.8183  | -9.7953  | H | -9.6941  | -5.4160 | -8.5001  |
| H  | -6.8954  | -0.0899 | -10.0755 | H | -8.6226  | -4.2950 | -7.6297  |
| H  | -8.4522  | 0.5824  | -9.4854  | C | -11.8269 | -3.6540 | -8.8358  |
| H  | -7.4372  | 1.5226  | -10.6318 | H | -12.3363 | -2.8131 | -9.3202  |
| H  | -6.4481  | -1.8123 | -5.8854  | H | -11.9098 | -4.5277 | -9.4932  |
| Rh | -10.9924 | -0.3869 | -5.4490  | H | -12.3517 | -3.8747 | -7.9021  |
| Rh | -8.7507  | 0.0604  | -6.3329  | C | -8.6255  | 4.1795  | -3.9614  |
| O  | -10.1473 | -1.8089 | -4.2109  | H | -8.6372  | 5.0960  | -3.3586  |
| O  | -8.0553  | -1.3183 | -4.9064  | H | -7.6277  | 3.7417  | -3.9099  |
| O  | -9.6934  | 1.2823  | -7.7067  | H | -8.8162  | 4.4527  | -5.0049  |
| O  | -11.7304 | 1.0298  | -6.7594  | C | -11.0879 | 3.8473  | -3.5658  |
| O  | -11.1870 | -1.8511 | -6.8996  | H | -11.8674 | 3.1822  | -3.1836  |
| O  | -9.0673  | -1.5405 | -7.6341  | H | -11.1161 | 4.7819  | -2.9927  |
| O  | -10.6827 | 1.1328  | -4.0927  | H | -11.3225 | 4.0827  | -4.6108  |
| O  | -8.6873  | 1.6712  | -5.0191  | C | -9.4152  | 2.8282  | -1.9728  |
| C  | -8.8961  | -2.0156 | -4.2468  | H | -8.4397  | 2.3417  | -1.8702  |
| C  | -9.6789  | 1.9014  | -4.2579  | H | -9.4156  | 3.7303  | -1.3490  |
| C  | -10.9329 | 1.5408  | -7.6096  | H | -10.1828 | 2.1456  | -1.5924  |
| C  | -10.1972 | -2.1336 | -7.6420  | C | -8.2828  | -2.6571 | -1.9377  |
| C  | -9.6915  | 3.2047  | -3.4444  | H | -7.8984  | -3.4455 | -1.2797  |
| C  | -11.5088 | 2.5972  | -8.5616  | H | -7.6115  | -1.7934 | -1.8674  |
| C  | -10.3446 | -3.3349 | -8.5866  | H | -9.2695  | -2.3526 | -1.5723  |
| C  | -8.3670  | -3.1770 | -3.3897  | C | -9.3542  | -4.3567 | -3.4731  |
| C  | -12.8664 | 2.1122  | -9.1017  | H | -9.4424  | -4.7217 | -4.5040  |
| H  | -13.5747 | 1.9255  | -8.2894  | H | -8.9966  | -5.1837 | -2.8486  |
| H  | -13.2946 | 2.8694  | -9.7691  | H | -10.3504 | -4.0673 | -3.1288  |
| H  | -12.7504 | 1.1826  | -9.6729  | C | -6.9827  | -3.6354 | -3.8705  |
| C  | -10.5394 | 2.8714  | -9.7213  | H | -6.6492  | -4.4910 | -3.2720  |
| H  | -10.9450 | 3.6656  | -10.3598 | H | -7.0088  | -3.9451 | -4.9209  |
| H  | -9.5565  | 3.1764  | -9.3522  | H | -6.2370  | -2.8437 | -3.7696  |
| H  | -10.4047 | 1.9764  | -10.3396 |   |          |         |          |
| C  | -11.6979 | 3.8795  | -7.7191  |   |          |         |          |

## E-F-ts-Piv-Me-Me

Energy (POTENTIAL) = -3326.9517473 Eh

| Atom | X       | Y       | Z       |    |          |                 |
|------|---------|---------|---------|----|----------|-----------------|
| N    | -6.6462 | 0.5266  | -7.0522 | C  | -5.5851  | 3.2647 -3.9208  |
| N    | -3.8008 | -1.0589 | -5.3309 | H  | -5.7348  | 4.3257 -4.1021  |
| N    | -2.0284 | 1.0673  | -5.7217 | C  | -5.1319  | 2.4500 -4.9580  |
| C    | -5.4505 | -0.2989 | -6.9295 | H  | -4.9469  | 2.8939 -5.9288  |
| H    | -4.9241 | -0.3369 | -7.8915 | S  | -6.5658  | 1.6976 -8.1837  |
| C    | -5.6368 | -1.7779 | -6.5156 | O  | -7.3477  | 2.8739 -7.7512  |
| C    | -6.2768 | -2.7949 | -7.2912 | O  | -5.1537  | 1.9524 -8.5862  |
| H    | -7.0844 | -2.4966 | -7.9487 | H  | -4.5945  | -5.5014 -6.1557 |
| C    | -5.9515 | -4.1307 | -7.1330 | C  | -6.6999  | -5.2321 -7.8453 |
| C    | -4.8670 | -4.4541 | -6.2716 | H  | -7.2696  | -5.8519 -7.1398 |
| C    | -4.1291 | -3.5034 | -5.5921 | H  | -7.4078  | -4.8243 -8.5727 |
| H    | -3.2784 | -3.7958 | -4.9864 | H  | -6.0155  | -5.9024 -8.3805 |
| C    | -4.4752 | -2.1426 | -5.7593 | C  | -7.3612  | 1.0492 -9.6743  |
| C    | -2.5644 | -1.0266 | -4.5632 | H  | -6.7901  | 0.1802 -10.0106 |
| H    | -2.7498 | -0.5459 | -3.5961 | H  | -8.3836  | 0.7647 -9.4352  |
| H    | -2.2223 | -2.0463 | -4.3793 | H  | -7.3422  | 1.8316 -10.4384 |
| C    | -1.4954 | -0.2409 | -5.3214 | H  | -6.7669  | -1.7630 -5.5279 |
| H    | -1.1779 | -0.8150 | -6.2104 | Rh | -10.9030 | -0.9119 -5.7243 |
| H    | -0.6263 | -0.1141 | -4.6737 | Rh | -8.7146  | -0.0578 -6.4177 |
| C    | -1.0700 | 2.0519  | -6.0704 | O  | -9.8525  | -2.1570 -4.4061 |
| C    | -0.0881 | 2.4218  | -5.1278 | O  | -7.8390  | -1.4752 -5.0940 |
| H    | -0.0862 | 1.9527  | -4.1480 | O  | -9.7580  | 1.2610 -7.5731  |
| C    | 0.8555  | 3.3995  | -5.4214 | O  | -11.7813 | 0.4001 -7.0323  |
| H    | 1.5952  | 3.6636  | -4.6678 | O  | -10.7927 | -2.2759 -7.2870 |
| C    | 0.8611  | 4.0680  | -6.6578 | O  | -8.8810  | -1.3392 -8.0540 |
| C    | 1.8890  | 5.1336  | -6.9574 | O  | -10.9334 | 0.5629 -4.2915  |
| H    | 2.9076  | 4.7231  | -6.9528 | O  | -8.8396  | 1.2577 -4.8063  |
| H    | 1.7194  | 5.5899  | -7.9386 | C  | -8.6157  | -2.1720 -4.2760 |
| H    | 1.8662  | 5.9346  | -6.2072 | C  | -9.9361  | 1.3450 -4.1636  |
| C    | -0.1201 | 3.7066  | -7.5848 | C  | -11.0284 | 1.2206 -7.6488  |
| H    | -0.1478 | 4.2012  | -8.5536 | C  | -9.9071  | -2.0867 -8.1797 |
| C    | -1.0654 | 2.7123  | -7.3100 | C  | -10.0602 | 2.4629 -3.1176  |
| H    | -1.7908 | 2.4571  | -8.0746 | C  | -11.6937 | 2.3059 -8.5016  |
| C    | -3.1808 | 0.9120  | -6.6040 | C  | -10.1418 | -2.7536 -9.5408 |
| H    | -3.5139 | 1.8801  | -6.9619 | C  | -8.0132  | -2.8726 -3.0674 |
| H    | -2.9246 | 0.3100  | -7.4928 | C  | -12.9986 | 1.7734 -9.1161  |
| C    | -4.3477 | 0.2069  | -5.8724 | H  | -13.7035 | 1.4555 -8.3425  |
| C    | -4.9180 | 1.0783  | -4.7549 | H  | -13.4724 | 2.5616 -9.7126  |
| C    | -5.2218 | 0.5418  | -3.4977 | H  | -12.8055 | 0.9176 -9.7735  |
| H    | -5.0800 | -0.5182 | -3.3182 | C  | -10.7335 | 2.7830 -9.6046  |
| C    | -5.6783 | 1.3543  | -2.4564 | H  | -11.2050 | 3.5911 -10.1760 |
| H    | -5.8915 | 0.9133  | -1.4862 | H  | -9.7945  | 3.1491 -9.1812  |
| C    | -5.8489 | 2.7242  | -2.6595 | H  | -10.4965 | 1.9696 -10.3008 |
| H    | -6.1985 | 3.3606  | -1.8512 | C  | -12.0000 | 3.4709 -7.5305  |
|      |         |         |         | H  | -11.0806 | 3.8499 -7.0698  |
|      |         |         |         | H  | -12.4741 | 4.2934 -8.0787  |
|      |         |         |         | H  | -12.6814 | 3.1503 -6.7343  |

|   |          |         |          |   |         |         |         |
|---|----------|---------|----------|---|---------|---------|---------|
| C | -8.8967  | -2.6683 | -10.4355 | H | -7.1194 | -2.4527 | -7.9584 |
| H | -8.0457  | -3.1980 | -9.9952  | C | -6.1184 | -4.1325 | -7.0275 |
| H | -9.1128  | -3.1268 | -11.4074 | C | -5.0318 | -4.4918 | -6.2209 |
| H | -8.5967  | -1.6301 | -10.6036 | C | -4.1543 | -3.5440 | -5.6799 |
| C | -10.5586 | -4.2211 | -9.3334  | H | -3.3229 | -3.8609 | -5.0584 |
| H | -11.4606 | -4.2927 | -8.7187  | C | -4.3781 | -2.1887 | -5.9567 |
| H | -10.7622 | -4.6893 | -10.3034 | C | -2.3995 | -1.0818 | -4.8352 |
| H | -9.7623  | -4.7924 | -8.8416  | H | -2.5564 | -0.6944 | -3.8187 |
| C | -11.3018 | -1.9606 | -10.1908 | H | -2.0141 | -2.1012 | -4.7543 |
| H | -11.0281 | -0.9072 | -10.3272 | C | -1.3746 | -0.2018 | -5.5527 |
| H | -11.5326 | -2.3824 | -11.1760 | H | -1.0548 | -0.6986 | -6.4865 |
| H | -12.2038 | -2.0052 | -9.5724  | H | -0.4959 | -0.0821 | -4.9168 |
| C | -9.3382  | 3.7227  | -3.6254  | C | -1.0723 | 2.1761  | -6.0926 |
| H | -9.3926  | 4.5116  | -2.8657  | C | -0.1067 | 2.4994  | -5.1151 |
| H | -8.2890  | 3.5180  | -3.8423  | H | -0.0686 | 1.9260  | -4.1930 |
| H | -9.8065  | 4.0992  | -4.5429  | C | 0.7717  | 3.5612  | -5.2968 |
| C | -11.5406 | 2.7815  | -2.8492  | H | 1.4986  | 3.7841  | -4.5178 |
| H | -12.0759 | 1.9106  | -2.4604  | C | 0.7257  | 4.3663  | -6.4480 |
| H | -11.6117 | 3.5888  | -2.1107  | C | 1.6756  | 5.5277  | -6.6207 |
| H | -12.0468 | 3.1111  | -3.7636  | H | 2.7229  | 5.1983  | -6.5976 |
| C | -9.3946  | 1.9452  | -1.8231  | H | 1.5098  | 6.0433  | -7.5730 |
| H | -8.3462  | 1.6894  | -1.9954  | H | 1.5580  | 6.2670  | -5.8172 |
| H | -9.4368  | 2.7225  | -1.0505  | C | -0.2381 | 4.0502  | -7.4095 |
| H | -9.9132  | 1.0574  | -1.4421  | H | -0.3038 | 4.6480  | -8.3164 |
| C | -8.0246  | -1.7942 | -1.9518  | C | -1.1167 | 2.9734  | -7.2492 |
| H | -7.5788  | -2.2157 | -1.0438  | H | -1.8283 | 2.7589  | -8.0390 |
| H | -7.4448  | -0.9141 | -2.2468  | C | -3.1228 | 0.9697  | -6.7373 |
| H | -9.0470  | -1.4762 | -1.7227  | H | -3.4925 | 1.9471  | -7.0266 |
| C | -8.9010  | -4.0628 | -2.6660  | H | -2.8563 | 0.4361  | -7.6656 |
| H | -8.9246  | -4.8191 | -3.4592  | C | -4.2441 | 0.1727  | -6.0313 |
| H | -8.4917  | -4.5276 | -1.7627  | C | -4.8194 | 0.9616  | -4.8511 |
| H | -9.9270  | -3.7480 | -2.4589  | C | -5.0809 | 0.3360  | -3.6252 |
| C | -6.5821  | -3.3479 | -3.3261  | H | -4.9118 | -0.7314 | -3.5231 |
| H | -6.2168  | -3.8909 | -2.4480  | C | -5.5126 | 1.0703  | -2.5164 |
| H | -6.5371  | -4.0206 | -4.1864  | H | -5.6839 | 0.5645  | -1.5696 |
| H | -5.9029  | -2.5123 | -3.5026  | C | -5.7061 | 2.4485  | -2.6201 |

**F-Piv-Me-Me**

**Energy (POTENTIAL) = -3326.9625413 Eh**

| Atom | X       | Y       | Z       |
|------|---------|---------|---------|
| N    | -6.5958 | 0.4789  | -7.1270 |
| N    | -3.6449 | -1.0963 | -5.5748 |
| N    | -1.9662 | 1.1070  | -5.8560 |
| C    | -5.3599 | -0.3123 | -7.0804 |
| H    | -4.8641 | -0.2662 | -8.0592 |
| C    | -5.4747 | -1.7995 | -6.7629 |
| C    | -6.3066 | -2.7647 | -7.3146 |

|   |         |         |         |
|---|---------|---------|---------|
| H | -6.0308 | 3.0249  | -1.7581 |
| C | -5.4953 | 3.0761  | -3.8507 |
| H | -5.6642 | 4.1446  | -3.9542 |
| C | -5.0658 | 2.3394  | -4.9542 |
| H | -4.9211 | 2.8496  | -5.8991 |
| S | -6.5597 | 1.6991  | -8.2122 |
| O | -7.3677 | 2.8368  | -7.7266 |
| O | -5.1632 | 2.0152  | -8.6238 |
| H | -4.8665 | -5.5429 | -5.9924 |
| C | -7.0821 | -5.1635 | -7.5685 |
| H | -8.1092 | -4.9634 | -7.2344 |

|    |          |         |          |   |          |         |          |
|----|----------|---------|----------|---|----------|---------|----------|
| H  | -7.1011  | -5.1724 | -8.6660  | H | -11.5526 | -2.4800 | -11.1720 |
| H  | -6.8166  | -6.1729 | -7.2354  | H | -12.2267 | -2.0056 | -9.5963  |
| C  | -7.3468  | 1.0736  | -9.7183  | C | -9.1742  | 3.7052  | -3.7059  |
| H  | -6.7526  | 0.2286  | -10.0761 | H | -9.1715  | 4.4941  | -2.9445  |
| H  | -8.3605  | 0.7544  | -9.4862  | H | -8.1421  | 3.4516  | -3.9521  |
| H  | -7.3497  | 1.8735  | -10.4640 | H | -9.6495  | 4.1051  | -4.6099  |
| H  | -7.0199  | -1.9294 | -5.1479  | C | -11.3983 | 2.8600  | -2.8785  |
| Rh | -10.9242 | -0.8779 | -5.7530  | H | -11.9630 | 2.0123  | -2.4794  |
| Rh | -8.7008  | -0.1090 | -6.4712  | H | -11.4154 | 3.6662  | -2.1357  |
| O  | -9.9752  | -2.0830 | -4.2896  | H | -11.9102 | 3.2155  | -3.7795  |
| O  | -7.9721  | -1.6657 | -5.1229  | C | -9.2689  | 1.9291  | -1.9016  |
| O  | -9.6951  | 1.2476  | -7.5931  | H | -8.2358  | 1.6316  | -2.0967  |
| O  | -11.7359 | 0.3829  | -7.1326  | H | -9.2647  | 2.7044  | -1.1261  |
| O  | -10.8086 | -2.3262 | -7.2415  | H | -9.8171  | 1.0624  | -1.5133  |
| O  | -8.9463  | -1.3725 | -8.1046  | C | -7.9730  | -1.7662 | -1.9323  |
| O  | -10.9370 | 0.6682  | -4.4001  | H | -7.4833  | -2.1763 | -1.0425  |
| O  | -8.7703  | 1.1768  | -4.8277  | H | -7.3595  | -0.9478 | -2.3194  |
| C  | -8.7588  | -2.2252 | -4.1801  | H | -8.9491  | -1.3653 | -1.6419  |
| C  | -9.8799  | 1.3595  | -4.2277  | C | -9.0682  | -3.9954 | -2.4629  |
| C  | -10.9636 | 1.2125  | -7.7115  | H | -9.1973  | -4.7885 | -3.2077  |
| C  | -9.9553  | -2.1508 | -8.1693  | H | -8.6366  | -4.4383 | -1.5596  |
| C  | -9.9403  | 2.4786  | -3.1800  | H | -10.0522 | -3.5896 | -2.2135  |
| C  | -11.5994 | 2.3158  | -8.5608  | C | -6.7477  | -3.4908 | -3.3230  |
| C  | -10.2088 | -2.8648 | -9.5019  | H | -6.3609  | -4.0183 | -2.4458  |
| C  | -8.1228  | -2.8994 | -2.9820  | H | -6.8073  | -4.2046 | -4.1500  |
| C  | -12.8906 | 1.7996  | -9.2172  | H | -6.0117  | -2.7213 | -3.5791  |
| H  | -13.6185 | 1.4755  | -8.4679  |   |          |         |          |
| H  | -13.3420 | 2.6003  | -9.8142  |   |          |         |          |
| H  | -12.6849 | 0.9527  | -9.8821  |   |          |         |          |
| C  | -10.6107 | 2.8125  | -9.6290  |   |          |         |          |
| H  | -11.0627 | 3.6425  | -10.1842 |   |          |         |          |
| H  | -9.6763  | 3.1546  | -9.1765  |   |          |         |          |
| H  | -10.3713 | 2.0177  | -10.3451 |   |          |         |          |
| C  | -11.9249 | 3.4606  | -7.5710  |   |          |         |          |
| H  | -11.0150 | 3.8280  | -7.0830  |   |          |         |          |
| H  | -12.3851 | 4.2943  | -8.1137  |   |          |         |          |
| H  | -12.6245 | 3.1249  | -6.7974  |   |          |         |          |
| C  | -8.9458  | -2.8852 | -10.3759 |   |          |         |          |
| H  | -8.1345  | -3.4398 | -9.8934  |   |          |         |          |
| H  | -9.1699  | -3.3752 | -11.3304 |   |          |         |          |
| H  | -8.5870  | -1.8732 | -10.5841 |   |          |         |          |
| C  | -10.7097 | -4.2973 | -9.2479  |   |          |         |          |
| H  | -11.6171 | -4.2997 | -8.6374  |   |          |         |          |
| H  | -10.9346 | -4.7837 | -10.2041 |   |          |         |          |
| H  | -9.9484  | -4.8959 | -8.7349  |   |          |         |          |
| C  | -11.3136 | -2.0333 | -10.1999 |   |          |         |          |
| H  | -10.9803 | -1.0027 | -10.3710 |   |          |         |          |

**G-Piv-Me-Me**

**Energy (POTENTIAL) = -3327.0229342 Eh**

| Atom | X       | Y       | Z       |
|------|---------|---------|---------|
| N    | -5.4675 | -0.7232 | -5.9425 |
| N    | -2.5735 | -2.7713 | -5.0664 |
| N    | -0.8282 | -0.6246 | -4.7569 |
| C    | -4.3074 | -1.5736 | -6.0946 |
| H    | -3.8763 | -1.3953 | -7.0890 |
| C    | -4.6539 | -3.0374 | -5.9644 |
| C    | -5.8011 | -3.7104 | -6.3320 |
| H    | -6.6456 | -3.1573 | -6.7352 |
| C    | -5.8819 | -5.1052 | -6.1364 |
| C    | -4.7762 | -5.7574 | -5.5746 |
| C    | -3.6095 | -5.0777 | -5.1837 |
| H    | -2.7874 | -5.6135 | -4.7185 |
| C    | -3.5589 | -3.6959 | -5.3772 |
| C    | -1.3012 | -3.0221 | -4.4220 |
| H    | -1.3759 | -2.9729 | -3.3256 |
| H    | -0.9583 | -4.0245 | -4.6957 |
| C    | -0.2865 | -1.9845 | -4.9075 |



|    |          |         |         |   |          |         |          |
|----|----------|---------|---------|---|----------|---------|----------|
| H  | -0.0452  | -2.1791 | -5.9676 | O | -8.0967  | -1.3247 | -4.6561  |
| H  | 0.6328   | -2.0842 | -4.3289 | O | -9.8427  | 1.0126  | -7.5917  |
| C  | 0.1097   | 0.4352  | -4.7349 | O | -11.7994 | -0.0862 | -7.3112  |
| C  | 1.1466   | 0.4211  | -3.7781 | O | -10.4129 | -2.6137 | -7.3029  |
| H  | 1.2080   | -0.4008 | -3.0704 | O | -8.4567  | -1.5251 | -7.6175  |
| C  | 2.0676   | 1.4597  | -3.7033 | O | -11.4827 | 0.1367  | -4.4051  |
| H  | 2.8502   | 1.4180  | -2.9479 | O | -9.5144  | 1.2108  | -4.6982  |
| C  | 1.9983   | 2.5687  | -4.5642 | C | -8.8654  | -2.1311 | -4.0232  |
| C  | 2.9924   | 3.7006  | -4.4537 | C | -10.6504 | 1.0614  | -4.1388  |
| H  | 4.0261   | 3.3366  | -4.5168 | C | -11.0697 | 0.7976  | -7.8638  |
| H  | 2.8483   | 4.4392  | -5.2497 | C | -9.3403  | -2.3871 | -7.9474  |
| H  | 2.8983   | 4.2255  | -3.4935 | C | -11.0286 | 2.1047  | -3.0821  |
| C  | 0.9650   | 2.5837  | -5.5049 | C | -11.7227 | 1.7259  | -8.8938  |
| H  | 0.8803   | 3.4229  | -6.1924 | C | -9.1530  | -3.1228 | -9.2795  |
| C  | 0.0419   | 1.5370  | -5.6040 | C | -8.3094  | -2.7814 | -2.7527  |
| H  | -0.7236  | 1.5891  | -6.3706 | C | -12.9904 | 1.0824  | -9.4775  |
| C  | -2.0382  | -0.4447 | -5.5539 | H | -13.7245 | 0.8630  | -8.6970  |
| H  | -2.3846  | 0.5838  | -5.4738 | H | -13.4492 | 1.7666  | -10.2007 |
| H  | -1.8528  | -0.6514 | -6.6226 | H | -12.7572 | 0.1452  | -9.9962  |
| C  | -3.1325  | -1.4044 | -5.0524 | C | -10.7227 | 2.0447  | -10.0195 |
| C  | -3.6588  | -0.9865 | -3.6681 | H | -11.1852 | 2.7260  | -10.7431 |
| C  | -3.8050  | -1.9127 | -2.6272 | H | -9.8191  | 2.5193  | -9.6271  |
| H  | -3.5480  | -2.9534 | -2.7877 | H | -10.4259 | 1.1332  | -10.5524 |
| C  | -4.2958  | -1.5227 | -1.3777 | C | -12.0892 | 3.0188  | -8.1270  |
| H  | -4.3944  | -2.2626 | -0.5876 | H | -11.1962 | 3.4931  | -7.7057  |
| C  | -4.6689  | -0.1978 | -1.1501 | H | -12.5700 | 3.7305  | -8.8081  |
| H  | -5.0538  | 0.1066  | -0.1805 | H | -12.7855 | 2.8053  | -7.3073  |
| C  | -4.5506  | 0.7324  | -2.1868 | C | -7.6672  | -3.3381 | -9.6083  |
| H  | -4.8477  | 1.7662  | -2.0307 | H | -7.1800  | -3.9747 | -8.8631  |
| C  | -4.0509  | 0.3419  | -3.4300 | H | -7.5801  | -3.8332 | -10.5825 |
| H  | -3.9801  | 1.0808  | -4.2204 | H | -7.1212  | -2.3925 | -9.6591  |
| S  | -5.6748  | 0.6598  | -6.7912 | C | -9.8919  | -4.4704 | -9.2662  |
| O  | -6.9693  | 1.2170  | -6.3057 | H | -10.9591 | -4.3389 | -9.0685  |
| O  | -4.4762  | 1.5054  | -6.7025 | H | -9.7780  | -4.9604 | -10.2402 |
| H  | -4.8290  | -6.8315 | -5.4085 | H | -9.4823  | -5.1388 | -8.5003  |
| C  | -7.1386  | -5.8556 | -6.5146 | C | -9.7904  | -2.1800 | -10.3323 |
| H  | -8.0329  | -5.2474 | -6.3309 | H | -9.2770  | -1.2121 | -10.3526 |
| H  | -7.1486  | -6.1285 | -7.5791 | H | -9.7137  | -2.6317 | -11.3280 |
| H  | -7.2394  | -6.7841 | -5.9412 | H | -10.8500 | -2.0044 | -10.1141 |
| C  | -5.8890  | 0.1886  | -8.5094 | C | -11.1963 | 3.4538  | -3.8160  |
| H  | -5.0007  | -0.3512 | -8.8463 | H | -11.4622 | 4.2369  | -3.0962  |
| H  | -6.7821  | -0.4338 | -8.5740 | H | -10.2689 | 3.7454  | -4.3190  |
| H  | -6.0074  | 1.1117  | -9.0833 | H | -11.9925 | 3.3977  | -4.5685  |
| H  | -6.2347  | -1.0004 | -5.3279 | C | -12.3365 | 1.7206  | -2.3752  |
| Rh | -10.9981 | -1.2856 | -5.8281 | H | -12.2433 | 0.7571  | -1.8627  |
| Rh | -8.9160  | -0.1178 | -6.1437 | H | -12.5865 | 2.4833  | -1.6284  |
| O  | -10.0694 | -2.3801 | -4.3399 | H | -13.1676 | 1.6473  | -3.0834  |

|   |          |         |         |
|---|----------|---------|---------|
| C | -9.8784  | 2.1990  | -2.0587 |
| H | -8.9411  | 2.4893  | -2.5421 |
| H | -10.1225 | 2.9461  | -1.2945 |
| H | -9.7191  | 1.2373  | -1.5561 |
| C | -8.1050  | -1.6297 | -1.7408 |
| H | -7.7175  | -2.0315 | -0.7976 |
| H | -7.3930  | -0.8926 | -2.1217 |
| H | -9.0543  | -1.1212 | -1.5315 |
| C | -9.3007  | -3.8088 | -2.1873 |
| H | -9.4938  | -4.6127 | -2.9059 |
| H | -8.8811  | -4.2564 | -1.2787 |
| H | -10.2586 | -3.3454 | -1.9315 |
| C | -6.9655  | -3.4625 | -3.0603 |
| H | -6.5439  | -3.8746 | -2.1365 |
| H | -7.0909  | -4.2844 | -3.7721 |
| H | -6.2444  | -2.7585 | -3.4773 |

### 2\_Me-Me

Energy (POTENTIAL) = -769.6116649 Eh

| Atom | X        | Y      | Z       |
|------|----------|--------|---------|
| N    | -10.1346 | 3.9657 | 2.0620  |
| C    | -13.2012 | 2.8871 | -0.6696 |
| C    | -13.4306 | 3.8103 | 0.3587  |
| H    | -14.4168 | 4.2587 | 0.4626  |
| C    | -12.4291 | 4.1846 | 1.2544  |
| H    | -12.6581 | 4.9120 | 2.0259  |
| C    | -11.1343 | 3.6328 | 1.1570  |
| C    | -10.8941 | 2.7056 | 0.1182  |
| H    | -9.9138  | 2.2537 | 0.0051  |
| C    | -11.9096 | 2.3493 | -0.7666 |
| H    | -11.6876 | 1.6333 | -1.5558 |
| C    | -10.2696 | 5.0853 | 2.9884  |
| H    | -11.1026 | 4.9286 | 3.6799  |
| H    | -10.4324 | 6.0373 | 2.4580  |
| C    | -8.9260  | 5.0769 | 3.7106  |
| H    | -8.6452  | 6.0762 | 4.0562  |
| H    | -8.9428  | 4.4009 | 4.5806  |
| C    | -8.7316  | 3.7628 | 1.7206  |
| H    | -8.5129  | 4.0687 | 0.6842  |
| H    | -8.4534  | 2.7004 | 1.8177  |
| C    | -6.6616  | 4.4086 | 2.9098  |
| C    | -6.0409  | 4.9054 | 4.0748  |
| H    | -6.6246  | 5.4255 | 4.8268  |
| C    | -4.6705  | 4.7389 | 4.2767  |
| H    | -4.2254  | 5.1372 | 5.1864  |
| C    | -3.8587  | 4.0731 | 3.3503  |
| C    | -4.4830  | 3.5770 | 2.1960  |

|   |          |        |         |
|---|----------|--------|---------|
| C | -5.8483  | 3.7341 | 1.9707  |
| H | -6.2796  | 3.3452 | 1.0538  |
| H | -3.8867  | 3.0546 | 1.4499  |
| N | -8.0159  | 4.6023 | 2.6732  |
| C | -14.2995 | 2.4677 | -1.6188 |
| H | -13.9178 | 2.3204 | -2.6363 |
| H | -14.7612 | 1.5195 | -1.3092 |
| H | -15.0980 | 3.2171 | -1.6642 |
| C | -2.3793  | 3.8755 | 3.5840  |
| H | -2.0213  | 4.4855 | 4.4208  |
| H | -2.1432  | 2.8278 | 3.8165  |
| H | -1.7910  | 4.1444 | 2.6975  |

### TS D'-E'-Piv-Me-Me

Energy (POTENTIAL) = -3326.95505059 Eh

|   |          |          |          |
|---|----------|----------|----------|
| N | -5.45145 | 0.89282  | -8.2365  |
| N | -4.1077  | -0.5849  | -5.18833 |
| N | -1.9491  | 1.20811  | -5.43261 |
| C | -5.3202  | 0.22418  | -7.07826 |
| H | -6.22799 | -0.02512 | -6.53242 |
| C | -4.64599 | -1.62208 | -7.23958 |
| C | -5.39287 | -2.63312 | -7.91894 |
| H | -5.56985 | -2.4956  | -8.98169 |
| C | -5.80827 | -3.7738  | -7.26539 |
| C | -5.42531 | -3.9332  | -5.89937 |
| C | -4.74481 | -2.96379 | -5.18231 |
| H | -4.53895 | -3.10171 | -4.12551 |
| C | -4.42405 | -1.75099 | -5.82876 |
| C | -3.16602 | -0.4673  | -4.07619 |
| H | -3.55061 | 0.26457  | -3.36042 |
| H | -3.06973 | -1.43232 | -3.5748  |
| C | -1.80565 | -0.01186 | -4.61756 |
| H | -1.36509 | -0.82856 | -5.21656 |
| H | -1.13955 | 0.18242  | -3.77512 |
| C | -0.73135 | 1.8732   | -5.73548 |
| C | 0.08552  | 2.3338   | -4.68274 |
| H | -0.23636 | 2.1896   | -3.6551  |
| C | 1.2811   | 2.99604  | -4.94006 |
| H | 1.88356  | 3.34459  | -4.1033  |
| C | 1.7179   | 3.24106  | -6.25305 |
| C | 3.02153  | 3.95625  | -6.51697 |
| H | 3.88267  | 3.34871  | -6.20741 |
| H | 3.14398  | 4.18598  | -7.58091 |
| H | 3.08057  | 4.89995  | -5.95993 |
| C | 0.89934  | 2.79315  | -7.29355 |
| H | 1.20651  | 2.95488  | -8.32415 |
| C | -0.30237 | 2.11939  | -7.05048 |
| H | -0.8915  | 1.7869   | -7.89683 |
| C | -2.86305 | 1.0021   | -6.5643  |
| H | -2.92204 | 1.90582  | -7.16612 |

|    |          |          |           |   |          |          |           |
|----|----------|----------|-----------|---|----------|----------|-----------|
| H  | -2.50574 | 0.20571  | -7.22203  | H | -5.26449 | 2.7291   | -15.07809 |
| C  | -4.24597 | 0.62869  | -6.02176  | C | -6.7093  | 4.11562  | -12.21846 |
| C  | -4.9039  | 1.76209  | -5.21544  | H | -5.96797 | 4.90926  | -12.06219 |
| C  | -5.87559 | 1.44759  | -4.25258  | H | -7.57585 | 4.55911  | -12.724   |
| H  | -6.08891 | 0.40481  | -4.03515  | H | -7.0208  | 3.74023  | -11.23989 |
| C  | -6.56358 | 2.45335  | -3.57119  | C | -4.69208 | -2.87797 | -13.90198 |
| H  | -7.3055  | 2.18649  | -2.82311  | H | -3.62836 | -2.87478 | -14.15641 |
| C  | -6.30241 | 3.79569  | -3.85659  | H | -5.11991 | -3.83702 | -14.21726 |
| H  | -6.83969 | 4.58203  | -3.33331  | H | -5.18019 | -2.08172 | -14.47578 |
| C  | -5.34739 | 4.11874  | -4.8237   | C | -4.16205 | -3.78523 | -11.6057  |
| H  | -5.13829 | 5.1589   | -5.05871  | H | -4.29685 | -3.66247 | -10.52614 |
| C  | -4.65396 | 3.112    | -5.49851  | H | -4.54405 | -4.77307 | -11.89006 |
| H  | -3.92265 | 3.39449  | -6.24638  | H | -3.08792 | -3.76081 | -11.82392 |
| S  | -7.02998 | 1.22468  | -8.75642  | C | -6.41658 | -2.73562 | -12.07259 |
| O  | -7.12348 | 2.68714  | -8.92439  | H | -6.95579 | -1.93556 | -12.59321 |
| O  | -7.39788 | 0.36606  | -9.89639  | H | -6.83076 | -3.69668 | -12.40016 |
| H  | -5.71687 | -4.84745 | -5.38644  | H | -6.60525 | -2.62272 | -11.00226 |
| C  | -6.59425 | -4.85963 | -7.95786  | C | -0.49416 | 5.04697  | -10.31412 |
| H  | -7.5701  | -5.01263 | -7.47877  | H | -0.34446 | 6.12401  | -10.17451 |
| H  | -6.77142 | -4.61078 | -9.00923  | H | 0.22991  | 4.52204  | -9.6815   |
| H  | -6.06485 | -5.82036 | -7.92154  | H | -0.28113 | 4.80042  | -11.35809 |
| C  | -8.18462 | 0.8078   | -7.41901  | C | -2.93598 | 5.41769  | -10.85225 |
| H  | -8.20778 | -0.26917 | -7.23959  | H | -3.96894 | 5.15092  | -10.60157 |
| H  | -7.94631 | 1.36429  | -6.51024  | H | -2.82043 | 6.50031  | -10.7227  |
| H  | -9.15235 | 1.13417  | -7.80915  | H | -2.76139 | 5.17378  | -11.90589 |
| H  | -3.83846 | -1.19665 | -7.82937  | C | -2.21592 | 5.02706  | -8.46584  |
| Rh | -3.91843 | 0.84643  | -10.04916 | H | -1.55825 | 4.47156  | -7.78957  |
| Rh | -2.46626 | 0.90166  | -12.00393 | H | -2.0404  | 6.09799  | -8.3092   |
| O  | -2.49991 | -0.46766 | -9.21945  | H | -3.25209 | 4.805    | -8.19453  |
| O  | -1.1102  | -0.28296 | -10.98421 | C | 0.30303  | -1.15788 | -8.151    |
| O  | -3.92069 | 2.00108  | -12.97766 | H | 0.98151  | -1.8854  | -7.68963  |
| O  | -5.1862  | 2.0585   | -11.10598 | H | 0.90657  | -0.34139 | -8.56256  |
| O  | -4.77285 | -0.86647 | -10.84099 | H | -0.33708 | -0.74254 | -7.3677   |
| O  | -3.39712 | -0.83283 | -12.63805 | C | -1.3869  | -2.97002 | -8.62871  |
| O  | -2.97957 | 2.57437  | -9.40609  | H | -2.04913 | -3.42453 | -9.37462  |
| O  | -1.68851 | 2.68419  | -11.26037 | H | -0.73234 | -3.75425 | -8.2307   |
| C  | -1.45189 | -0.78937 | -9.87309  | H | -2.00678 | -2.59734 | -7.80971  |
| C  | -2.19784 | 3.1846   | -10.2065  | C | 0.40151  | -2.43799 | -10.32116 |
| C  | -4.9739  | 2.31077  | -12.33296 | H | 1.04678  | -3.19931 | -9.86766  |
| C  | -4.32251 | -1.34575 | -11.92952 | H | -0.16978 | -2.91    | -11.1283  |
| C  | -1.93538 | 4.67062  | -9.93435  | H | 1.0382   | -1.6671  | -10.7647  |
| C  | -6.12656 | 2.98304  | -13.08438 |   |          |          |           |
| C  | -4.91211 | -2.68515 | -12.39296 |   |          |          |           |
| C  | -0.53099 | -1.84957 | -9.24984  |   |          |          |           |
| C  | -7.18974 | 1.8761   | -13.28426 |   |          |          |           |
| H  | -7.51923 | 1.47858  | -12.31914 |   |          |          |           |
| H  | -8.05694 | 2.28519  | -13.81659 |   |          |          |           |
| H  | -6.785   | 1.04695  | -13.87844 |   |          |          |           |
| C  | -5.65915 | 3.5268   | -14.4412  |   |          |          |           |
| H  | -6.50333 | 3.99586  | -14.96053 |   |          |          |           |
| H  | -4.87321 | 4.28099  | -14.31833 |   |          |          |           |

**E'-Piv-Me-Me**

**Energy (POTENTIAL) = -3326.97485742 Eh**

|   |          |          |          |
|---|----------|----------|----------|
| N | -5.12212 | 1.25162  | -8.2875  |
| N | -3.93117 | -0.93701 | -5.60383 |
| N | -1.92006 | 0.96214  | -5.33432 |
| C | -5.23684 | 0.2769   | -7.2187  |
| H | -6.23238 | 0.28582  | -6.76281 |
| C | -5.00605 | -1.1997  | -7.63208 |
| C | -6.14471 | -1.93972 | -8.23354 |

|   |          |          |          |    |          |          |           |
|---|----------|----------|----------|----|----------|----------|-----------|
| H | -6.75696 | -1.40217 | -8.94938 | H  | -6.08862 | 3.52783  | -6.59885  |
| C | -6.34486 | -3.24862 | -7.94074 | H  | -7.80265 | 3.51403  | -7.11726  |
| C | -5.42982 | -3.9013  | -7.01716 | H  | -4.18952 | -1.21571 | -8.37757  |
| C | -4.47435 | -3.25332 | -6.2789  | Rh | -3.9481  | 0.83731  | -10.28911 |
| H | -3.8885  | -3.77652 | -5.53212 | Rh | -2.62408 | 0.64238  | -12.33798 |
| C | -4.41712 | -1.83877 | -6.42638 | O  | -2.36314 | -0.13361 | -9.31856  |
| C | -2.96911 | -1.11939 | -4.51701 | O  | -1.16951 | -0.33634 | -11.22776 |
| H | -3.38469 | -0.66531 | -3.61431 | O  | -4.161   | 1.57486  | -13.35603 |
| H | -2.80209 | -2.18261 | -4.34106 | O  | -5.43175 | 1.60524  | -11.48402 |
| C | -1.66458 | -0.4233  | -4.92456 | O  | -4.70065 | -1.06287 | -10.73204 |
| H | -1.19641 | -0.99705 | -5.74047 | O  | -3.51773 | -1.19172 | -12.66026 |
| H | -0.9849  | -0.44142 | -4.07156 | O  | -3.06566 | 2.69038  | -10.03397 |
| C | -0.81536 | 1.84665  | -5.3225  | O  | -1.83876 | 2.51066  | -11.92851 |
| C | -0.08785 | 2.03052  | -4.12862 | C  | -1.37622 | -0.57241 | -9.99924  |
| H | -0.38211 | 1.48903  | -3.2339  | C  | -2.26607 | 3.14575  | -10.91198 |
| C | 0.98177  | 2.91704  | -4.07342 | C  | -5.23265 | 1.83101  | -12.71631 |
| H | 1.52038  | 3.0382   | -3.13549 | C  | -4.32817 | -1.65482 | -11.79917 |
| C | 1.3639   | 3.67799  | -5.19142 | C  | -1.80937 | 4.5982   | -10.71583 |
| C | 2.52446  | 4.6412   | -5.11294 | C  | -6.39156 | 2.50314  | -13.46292 |
| H | 3.46969  | 4.11608  | -4.9206  | C  | -4.893   | -3.06173 | -12.04189 |
| H | 2.64157  | 5.20358  | -6.04544 | C  | -0.3611  | -1.44215 | -9.24376  |
| H | 2.39228  | 5.36577  | -4.29898 | C  | -7.68731 | 1.72466  | -13.15837 |
| C | 0.63169  | 3.5009   | -6.36879 | H  | -7.89813 | 1.71999  | -12.08567 |
| H | 0.8998   | 4.07103  | -7.25495 | H  | -8.53226 | 2.19009  | -13.67993 |
| C | -0.43426 | 2.59863  | -6.44588 | H  | -7.61126 | 0.68375  | -13.49773 |
| H | -0.95196 | 2.47731  | -7.39046 | C  | -6.13197 | 2.53191  | -14.97512 |
| C | -2.86666 | 1.06344  | -6.44925 | H  | -6.9674  | 3.02783  | -15.48392 |
| H | -3.01495 | 2.10599  | -6.72724 | H  | -5.21324 | 3.07717  | -15.21278 |
| H | -2.52219 | 0.53757  | -7.34453 | H  | -6.03701 | 1.51891  | -15.38242 |
| C | -4.21525 | 0.47324  | -6.01666 | C  | -6.50206 | 3.93923  | -12.90364 |
| C | -4.86248 | 1.21306  | -4.84447 | H  | -5.59553 | 4.51681  | -13.12539 |
| C | -5.92099 | 0.59966  | -4.15471 | H  | -7.35337 | 4.4554   | -13.36446 |
| H | -6.22442 | -0.40948 | -4.42123 | H  | -6.63909 | 3.91735  | -11.81823 |
| C | -6.59788 | 1.26753  | -3.13378 | C  | -4.48527 | -3.58713 | -13.42573 |
| H | -7.416   | 0.77296  | -2.61694 | H  | -3.39724 | -3.64997 | -13.52582 |
| C | -6.22657 | 2.56827  | -2.78313 | H  | -4.90309 | -4.59018 | -13.57489 |
| H | -6.75423 | 3.09432  | -1.99216 | H  | -4.86093 | -2.93794 | -14.22373 |
| C | -5.16953 | 3.18419  | -3.45571 | C  | -4.31189 | -3.97783 | -10.94238 |
| H | -4.868   | 4.1938   | -3.18983 | H  | -4.58672 | -3.61914 | -9.94772  |
| C | -4.48864 | 2.51102  | -4.47337 | H  | -4.69557 | -4.99799 | -11.06343 |
| H | -3.67054 | 3.01489  | -4.97391 | H  | -3.21722 | -4.01903 | -11.00719 |
| S | -6.50046 | 2.11467  | -8.49964 | C  | -6.42872 | -2.99735 | -11.93611 |
| O | -6.22974 | 3.25213  | -9.40137 | H  | -6.84571 | -2.34504 | -12.71341 |
| O | -7.6669  | 1.24177  | -8.81943 | H  | -6.85758 | -3.99785 | -12.06686 |
| H | -5.55528 | -4.97151 | -6.86598 | H  | -6.73913 | -2.60773 | -10.96525 |
| C | -7.45152 | -4.07456 | -8.54526 | C  | -0.82247 | 5.0201   | -11.81343 |
| H | -8.06296 | -4.54362 | -7.76399 | H  | -0.52068 | 6.06268  | -11.65661 |
| H | -8.10702 | -3.46224 | -9.17044 | H  | 0.07889  | 4.39775  | -11.80185 |
| H | -7.04523 | -4.88331 | -9.16571 | H  | -1.27374 | 4.93961  | -12.80753 |
| C | -6.92159 | 2.89877  | -6.9143  | C  | -3.07493 | 5.48113  | -10.76733 |
| H | -7.15715 | 2.16418  | -6.14395 | H  | -3.79475 | 5.17564  | -10.00216 |

|   |          |          |           |
|---|----------|----------|-----------|
| H | -2.80688 | 6.53185  | -10.60337 |
| H | -3.56711 | 5.40231  | -11.74465 |
| C | -1.14168 | 4.71138  | -9.33138  |
| H | -0.27253 | 4.04648  | -9.26324  |
| H | -0.79671 | 5.73839  | -9.16171  |
| H | -1.84031 | 4.44613  | -8.53336  |
| C | 0.42497  | -0.51546 | -8.29194  |
| H | 1.15614  | -1.09916 | -7.71975  |
| H | 0.96861  | 0.2561   | -8.85022  |
| H | -0.24004 | -0.01368 | -7.58569  |
| C | -1.13454 | -2.50126 | -8.4326   |
| H | -1.7303  | -3.14634 | -9.09007  |
| H | -0.4318  | -3.13495 | -7.87881  |
| H | -1.81345 | -2.03152 | -7.71714  |
| C | 0.6004   | -2.13138 | -10.2225  |
| H | 1.31062  | -2.75333 | -9.6647   |
| H | 0.0576   | -2.7752  | -10.9234  |
| H | 1.1681   | -1.4007  | -10.8065  |

#### 4-Me-Me

Energy (POTENTIAL) = -1721.5273898 Eh

| Atom | X        | Y       | Z       |
|------|----------|---------|---------|
| S    | -6.5330  | 1.5136  | -0.5323 |
| O    | -7.4602  | 1.0268  | -1.5648 |
| O    | -5.7975  | 0.5481  | 0.2948  |
| N    | -9.7164  | 3.2414  | 0.9636  |
| N    | -7.4071  | 2.5400  | 0.4941  |
| C    | -11.0165 | -0.3088 | 2.9335  |
| C    | -11.2507 | 0.9581  | 3.4828  |
| H    | -11.7690 | 1.0408  | 4.4362  |
| C    | -10.8260 | 2.1267  | 2.8515  |
| H    | -11.0162 | 3.0759  | 3.3386  |
| C    | -10.1499 | 2.0772  | 1.6155  |
| C    | -9.9174  | 0.8035  | 1.0539  |
| H    | -9.4069  | 0.7024  | 0.1034  |
| C    | -10.3446 | -0.3524 | 1.7051  |
| H    | -10.1463 | -1.3148 | 1.2374  |
| C    | -10.0784 | 4.5767  | 1.4371  |
| H    | -11.1034 | 4.5595  | 1.8180  |
| H    | -10.0851 | 5.2363  | 0.5647  |
| C    | -9.1292  | 5.1485  | 2.5108  |
| H    | -9.3241  | 6.2175  | 2.6499  |
| H    | -9.3139  | 4.6628  | 3.4721  |
| C    | -7.1975  | 3.6754  | 2.6518  |
| C    | -6.9893  | 2.6246  | 1.8271  |
| H    | -6.4797  | 1.7430  | 2.1963  |
| C    | -8.6772  | 3.1644  | -0.0238 |
| H    | -8.4636  | 4.1736  | -0.3748 |

|   |          |         |         |
|---|----------|---------|---------|
| H | -8.9675  | 2.5516  | -0.8781 |
| C | -6.9176  | 3.5739  | 4.1021  |
| C | -6.2593  | 4.6445  | 6.1889  |
| H | -5.9681  | 5.5419  | 6.7290  |
| C | -6.5469  | 4.7222  | 4.8267  |
| H | -6.4763  | 5.6738  | 4.3082  |
| C | -7.0219  | 5.7073  | 1.2689  |
| C | -7.6272  | 6.7968  | 0.6072  |
| H | -8.6676  | 7.0436  | 0.7838  |
| C | -6.8988  | 7.5866  | -0.2842 |
| H | -7.4037  | 8.4187  | -0.7712 |
| C | -5.5520  | 7.3368  | -0.5713 |
| C | -4.9535  | 6.2573  | 0.0953  |
| C | -5.6592  | 5.4605  | 0.9923  |
| H | -5.1522  | 4.6439  | 1.4935  |
| C | -7.0265  | 2.3524  | 4.7940  |
| H | -7.3792  | 1.4688  | 4.2699  |
| C | -6.7269  | 2.2752  | 6.1544  |
| H | -6.8185  | 1.3226  | 6.6701  |
| C | -6.3409  | 3.4194  | 6.8588  |
| H | -3.9040  | 6.0328  | -0.0861 |
| N | -7.7228  | 4.9169  | 2.1867  |
| H | -6.1196  | 3.3601  | 7.9212  |
| C | -5.3410  | 2.6058  | -1.3136 |
| H | -5.8792  | 3.3828  | -1.8607 |
| H | -4.7141  | 3.0464  | -0.5363 |
| H | -4.7388  | 2.0003  | -1.9973 |
| C | -11.4328 | -1.5696 | 3.6537  |
| H | -11.6071 | -2.3942 | 2.9530  |
| H | -10.6591 | -1.9031 | 4.3597  |
| H | -12.3517 | -1.4173 | 4.2320  |
| C | -4.7868  | 8.1701  | -1.5722 |
| H | -4.8794  | 7.7669  | -2.5908 |
| H | -5.1546  | 9.2024  | -1.6007 |
| H | -3.7171  | 8.1998  | -1.3345 |

#### D-noRh

Energy (POTENTIAL) = -1721.5153267 Eh

| Atom | X       | Y      | Z       |
|------|---------|--------|---------|
| N    | -6.7843 | 5.6561 | -4.4588 |
| N    | -3.4551 | 4.3846 | -4.1895 |
| N    | -2.4283 | 7.0370 | -3.7746 |
| C    | -5.5836 | 5.3907 | -4.8014 |
| H    | -5.3038 | 5.1725 | -5.8354 |
| C    | -3.6132 | 2.2533 | -2.9133 |
| C    | -4.1124 | 0.9586 | -2.7847 |
| H    | -3.8436 | 0.3719 | -1.9086 |

|   |         |         |         |   |         |         |         |
|---|---------|---------|---------|---|---------|---------|---------|
| C | -4.9699 | 0.4059  | -3.7476 | H | -6.2042 | -1.2515 | -4.3962 |
| C | -5.2870 | 1.1928  | -4.8613 | C | -8.6612 | 7.1888  | -5.6177 |
| C | -4.7699 | 2.4812  | -5.0121 | H | -9.0246 | 7.3514  | -4.6010 |
| H | -4.9980 | 3.0397  | -5.9134 | H | -7.8919 | 7.9186  | -5.8805 |
| C | -3.9427 | 3.0430  | -4.0286 | H | -9.4869 | 7.2288  | -6.3338 |
| C | -2.1168 | 4.6223  | -3.6336 | H | -2.9779 | 2.6546  | -2.1311 |
| H | -2.1163 | 4.6619  | -2.5330 |   |         |         |         |
| H | -1.4749 | 3.7930  | -3.9438 |   |         |         |         |
| C | -1.5527 | 5.9285  | -4.1691 |   |         |         |         |
| H | -1.4667 | 5.8746  | -5.2686 |   |         |         |         |
| H | -0.5541 | 6.0804  | -3.7572 |   |         |         |         |
| C | -1.8961 | 8.3470  | -3.8633 |   |         |         |         |
| C | -0.6791 | 8.6422  | -3.2123 |   |         |         |         |
| H | -0.1642 | 7.8631  | -2.6579 |   |         |         |         |
| C | -0.1414 | 9.9231  | -3.2471 |   |         |         |         |
| H | 0.7975  | 10.1155 | -2.7315 |   |         |         |         |
| C | -0.7911 | 10.9775 | -3.9120 |   |         |         |         |
| C | -0.1991 | 12.3669 | -3.9241 |   |         |         |         |
| H | 0.8238  | 12.3639 | -4.3219 |   |         |         |         |
| H | -0.7952 | 13.0510 | -4.5376 |   |         |         |         |
| H | -0.1448 | 12.7887 | -2.9115 |   |         |         |         |
| C | -2.0010 | 10.6841 | -4.5458 |   |         |         |         |
| H | -2.5326 | 11.4726 | -5.0745 |   |         |         |         |
| C | -2.5473 | 9.3956  | -4.5341 |   |         |         |         |
| H | -3.4775 | 9.2222  | -5.0635 |   |         |         |         |
| C | -3.7807 | 6.8422  | -4.2730 |   |         |         |         |
| H | -4.4300 | 7.6334  | -3.8916 |   |         |         |         |
| H | -3.8007 | 6.8908  | -5.3759 |   |         |         |         |
| C | -4.4133 | 5.4790  | -3.8350 |   |         |         |         |
| C | -4.8354 | 5.4352  | -2.3589 |   |         |         |         |
| C | -4.2613 | 6.2787  | -1.3958 |   |         |         |         |
| H | -3.5261 | 7.0157  | -1.6949 |   |         |         |         |
| C | -4.6101 | 6.1699  | -0.0461 |   |         |         |         |
| H | -4.1518 | 6.8381  | 0.6787  |   |         |         |         |
| C | -5.5354 | 5.2117  | 0.3692  |   |         |         |         |
| H | -5.8063 | 5.1270  | 1.4185  |   |         |         |         |
| C | -6.1111 | 4.3619  | -0.5791 |   |         |         |         |
| H | -6.8345 | 3.6106  | -0.2732 |   |         |         |         |
| C | -5.7650 | 4.4720  | -1.9259 |   |         |         |         |
| H | -6.2292 | 3.8054  | -2.6429 |   |         |         |         |
| S | -7.9555 | 5.5448  | -5.7203 |   |         |         |         |
| O | -7.3289 | 5.3682  | -7.0445 |   |         |         |         |
| O | -8.9427 | 4.5532  | -5.2676 |   |         |         |         |
| H | -5.9323 | 0.7882  | -5.6375 |   |         |         |         |
| C | -5.5113 | -0.9948 | -3.5880 |   |         |         |         |
| H | -4.7029 | -1.7377 | -3.5911 |   |         |         |         |
| H | -6.0460 | -1.1095 | -2.6366 |   |         |         |         |

### 3\_Me-Me

Energy (POTENTIAL) = -1721.5487224 Eh

| Atom | X       | Y       | Z       |
|------|---------|---------|---------|
| N    | -7.1895 | 5.1067  | -3.9620 |
| H    | -7.3207 | 5.0235  | -2.9574 |
| N    | -3.6569 | 4.2312  | -3.8593 |
| N    | -2.6969 | 6.8464  | -3.8103 |
| C    | -5.8791 | 4.7704  | -4.5014 |
| H    | -5.8535 | 5.1563  | -5.5266 |
| C    | -5.6216 | 3.2758  | -4.5242 |
| C    | -6.4647 | 2.2431  | -4.8832 |
| H    | -7.4961 | 2.4585  | -5.1553 |
| C    | -5.9866 | 0.9145  | -4.8922 |
| C    | -4.6519 | 0.6927  | -4.5318 |
| C    | -3.7841 | 1.7326  | -4.1598 |
| H    | -2.7591 | 1.5196  | -3.8718 |
| C    | -4.2825 | 3.0370  | -4.1632 |
| C    | -2.3144 | 4.4422  | -3.3672 |
| H    | -2.2990 | 4.5251  | -2.2696 |
| H    | -1.6859 | 3.5953  | -3.6558 |
| C    | -1.7576 | 5.7244  | -3.9926 |
| H    | -1.5784 | 5.5526  | -5.0685 |
| H    | -0.8017 | 5.9673  | -3.5258 |
| C    | -2.1614 | 8.1435  | -4.0081 |
| C    | -1.0745 | 8.5670  | -3.2146 |
| H    | -0.6690 | 7.8947  | -2.4638 |
| C    | -0.5354 | 9.8397  | -3.3593 |
| H    | 0.3011  | 10.1342 | -2.7284 |
| C    | -1.0585 | 10.7600 | -4.2844 |
| C    | -0.4696 | 12.1447 | -4.4148 |
| H    | 0.6015  | 12.1049 | -4.6518 |
| H    | -0.9657 | 12.7185 | -5.2048 |
| H    | -0.5673 | 12.7114 | -3.4792 |
| C    | -2.1416 | 10.3410 | -5.0615 |
| H    | -2.5704 | 11.0232 | -5.7928 |
| C    | -2.6829 | 9.0560  | -4.9395 |
| H    | -3.5038 | 8.7731  | -5.5901 |
| C    | -4.0014 | 6.5602  | -4.4021 |
| H    | -4.6479 | 7.4297  | -4.2892 |
| H    | -3.9251 | 6.3415  | -5.4808 |

|   |         |         |         |
|---|---------|---------|---------|
| C | -4.6223 | 5.3333  | -3.7124 |
| C | -4.9640 | 5.5878  | -2.2310 |
| C | -4.9908 | 4.5142  | -1.3257 |
| H | -4.7143 | 3.5201  | -1.6600 |
| C | -5.3648 | 4.7028  | 0.0068  |
| H | -5.3746 | 3.8539  | 0.6854  |
| C | -5.7209 | 5.9728  | 0.4655  |
| H | -6.0097 | 6.1214  | 1.5025  |
| C | -5.6974 | 7.0499  | -0.4226 |
| H | -5.9662 | 8.0463  | -0.0815 |
| C | -5.3252 | 6.8576  | -1.7554 |
| H | -5.3161 | 7.7166  | -2.4163 |
| S | -8.2341 | 6.1690  | -4.6907 |
| O | -8.1640 | 5.9181  | -6.1374 |
| O | -9.5032 | 6.0324  | -3.9634 |
| H | -4.2700 | -0.3261 | -4.5303 |
| C | -6.9031 | -0.2236 | -5.2777 |
| H | -7.7346 | -0.3334 | -4.5682 |
| H | -7.3514 | -0.0632 | -6.2671 |
| H | -6.3658 | -1.1778 | -5.3071 |
| C | -7.6275 | 7.8392  | -4.4114 |
| H | -7.5546 | 8.0163  | -3.3367 |
| H | -6.6562 | 7.9524  | -4.8962 |
| H | -8.3504 | 8.5262  | -4.8606 |

### 2\_MeO-NO2

Energy (POTENTIAL) = -1010.0909183 Eh

| Atom | X        | Y      | Z       |
|------|----------|--------|---------|
| N    | -10.1116 | 3.6662 | 2.2621  |
| C    | -13.1056 | 2.4386 | -0.4759 |
| C    | -13.4080 | 3.3470 | 0.5438  |
| H    | -14.4094 | 3.7466 | 0.6571  |
| C    | -12.4148 | 3.7653 | 1.4353  |
| H    | -12.6863 | 4.4757 | 2.2085  |
| C    | -11.0979 | 3.2830 | 1.3436  |
| C    | -10.8076 | 2.3668 | 0.3083  |
| H    | -9.8072  | 1.9619 | 0.1968  |
| C    | -11.7937 | 1.9552 | -0.5806 |
| H    | -11.5583 | 1.2515 | -1.3740 |
| C    | -10.2949 | 4.8522 | 3.0963  |
| H    | -11.1303 | 4.7217 | 3.7887  |
| H    | -10.4820 | 5.7540 | 2.4906  |
| C    | -8.9630  | 4.9517 | 3.8378  |
| H    | -8.6990  | 5.9896 | 4.0608  |
| H    | -8.9768  | 4.3838 | 4.7776  |

|   |          |        |         |
|---|----------|--------|---------|
| C | -8.7136  | 3.5866 | 1.8620  |
| H | -8.5356  | 4.0157 | 0.8599  |
| H | -8.3646  | 2.5457 | 1.8497  |
| C | -6.6712  | 4.3639 | 3.0284  |
| C | -6.0529  | 4.9997 | 4.1411  |
| H | -6.6595  | 5.4759 | 4.9021  |
| C | -4.6779  | 5.0100 | 4.2753  |
| H | -4.2131  | 5.4919 | 5.1271  |
| C | -3.8752  | 4.3868 | 3.3090  |
| C | -4.4590  | 3.7519 | 2.2035  |
| C | -5.8334  | 3.7381 | 2.0624  |
| H | -6.2667  | 3.2522 | 1.1959  |
| H | -3.8269  | 3.2770 | 1.4629  |
| N | -8.0227  | 4.3590 | 2.8873  |
| N | -2.4418  | 4.3999 | 3.4524  |
| O | -1.7540  | 3.8393 | 2.5854  |
| O | -1.9495  | 4.9719 | 4.4372  |
| O | -13.9957 | 1.9719 | -1.4051 |
| C | -15.3352 | 2.4493 | -1.3428 |
| H | -15.3837 | 3.5392 | -1.4716 |
| H | -15.8654 | 1.9675 | -2.1676 |
| H | -15.8199 | 2.1748 | -0.3959 |

### A\_Piv-MeO-NO2

Energy (POTENTIAL) = -3567.4229785 Eh

| Atom | X        | Y      | Z       |
|------|----------|--------|---------|
| S    | -5.5820  | 2.0698 | -0.2406 |
| O    | -6.9319  | 2.0213 | -0.8297 |
| O    | -4.8250  | 0.8090 | -0.0956 |
| N    | -10.1058 | 4.2810 | 1.7528  |
| N    | -5.7393  | 2.9021 | 1.2456  |
| C    | -13.1843 | 1.9021 | 0.2602  |
| C    | -13.4682 | 3.1904 | 0.7378  |
| H    | -14.4876 | 3.5564 | 0.7138  |
| C    | -12.4516 | 3.9829 | 1.2341  |
| H    | -12.6844 | 4.9780 | 1.5946  |
| C    | -11.1085 | 3.5091 | 1.2702  |
| C    | -10.8501 | 2.1956 | 0.7845  |
| H    | -9.8441  | 1.7975 | 0.8087  |
| C    | -11.8699 | 1.4112 | 0.2851  |
| H    | -11.6626 | 0.4129 | -0.0800 |
| C    | -10.2868 | 5.5963 | 2.3717  |
| H    | -11.0630 | 5.5731 | 3.1451  |
| H    | -10.5661 | 6.3425 | 1.6172  |
| C    | -8.8863  | 5.8713 | 2.9603  |
| H    | -8.6245  | 6.9294 | 2.9575  |
| H    | -8.8255  | 5.4974 | 3.9879  |

|    |         |         |         |   |          |         |         |
|----|---------|---------|---------|---|----------|---------|---------|
| C  | -5.7763 | 2.7608  | 3.5954  | C | -3.6944  | -1.8752 | 4.3499  |
| C  | -5.3723 | 2.2523  | 2.3019  | C | -8.6223  | -1.4930 | 1.9334  |
| H  | -4.9006 | 1.2655  | 2.2602  | C | -10.5853 | 2.5317  | 6.0789  |
| C  | -8.6920 | 3.8564  | 1.8792  | N | -14.2451 | 1.0783  | -0.2523 |
| H  | -8.3326 | 3.3331  | 0.9958  | O | -15.4002 | 1.5342  | -0.2635 |
| H  | -8.5850 | 3.1942  | 2.7479  | O | -13.9675 | -0.0595 | -0.6645 |
| C  | -5.4558 | 4.0680  | 4.0498  | O | -5.5978  | 7.7500  | -2.2296 |
| C  | -5.8905 | 5.9384  | 5.5513  | C | -4.6349  | 8.7769  | -2.0167 |
| H  | -6.4667 | 6.3901  | 6.3530  | H | -4.3141  | 9.0993  | -3.0099 |
| C  | -6.1883 | 4.6546  | 5.1207  | H | -5.0666  | 9.6341  | -1.4831 |
| H  | -6.9995 | 4.0966  | 5.5679  | H | -3.7640  | 8.4054  | -1.4600 |
| C  | -7.4134 | 5.7710  | 0.9913  | C | -3.5786  | -3.1823 | 5.1467  |
| C  | -7.6933 | 5.4442  | -0.3466 | H | -2.7207  | -3.7592 | 4.7822  |
| H  | -8.3958 | 4.6559  | -0.5912 | H | -3.4299  | -2.9852 | 6.2139  |
| C  | -7.0653 | 6.1190  | -1.3909 | H | -4.4777  | -3.7961 | 5.0376  |
| H  | -7.2800 | 5.8575  | -2.4231 | C | -2.4103  | -1.0377 | 4.5078  |
| C  | -6.1549 | 7.1538  | -1.1332 | H | -1.5478  | -1.6108 | 4.1482  |
| C  | -5.8817 | 7.5022  | 0.1966  | H | -2.4707  | -0.1080 | 3.9344  |
| C  | -6.5025 | 6.8074  | 1.2367  | H | -2.2332  | -0.7816 | 5.5596  |
| H  | -6.2591 | 7.0601  | 2.2641  | C | -3.9437  | -2.1855 | 2.8555  |
| C  | -4.4066 | 4.8186  | 3.4460  | H | -3.1106  | -2.7748 | 2.4550  |
| H  | -3.8441 | 4.3860  | 2.6262  | H | -4.8651  | -2.7661 | 2.7251  |
| C  | -4.0950 | 6.0882  | 3.9085  | H | -4.0333  | -1.2670 | 2.2665  |
| H  | -3.2861 | 6.6505  | 3.4523  | C | -8.1026  | -0.8214 | 0.6553  |
| C  | -4.8394 | 6.6504  | 4.9551  | H | -8.5010  | -1.3449 | -0.2220 |
| H  | -5.1811 | 8.2942  | 0.4365  | H | -8.4001  | 0.2267  | 0.5923  |
| N  | -7.9678 | 5.0871  | 2.1155  | H | -7.0094  | -0.8482 | 0.6048  |
| H  | -4.5998 | 7.6503  | 5.3065  | C | -8.1730  | -2.9669 | 1.9716  |
| C  | -4.5891 | 3.2568  | -1.1476 | H | -8.5335  | -3.4695 | 2.8735  |
| H  | -5.1128 | 4.2153  | -1.1455 | H | -8.5689  | -3.4953 | 1.0965  |
| H  | -3.6104 | 3.3381  | -0.6690 | H | -7.0794  | -3.0454 | 1.9487  |
| H  | -4.4875 | 2.8751  | -2.1674 | C | -10.1639 | -1.4111 | 2.0026  |
| Rh | -6.6638 | 1.2903  | 4.6593  | H | -10.5035 | -0.3705 | 2.0351  |
| Rh | -7.4934 | -0.5668 | 6.0484  | H | -10.6014 | -1.8856 | 1.1163  |
| O  | -8.4316 | 2.2815  | 5.0770  | H | -10.5442 | -1.9242 | 2.8921  |
| O  | -9.2051 | 0.5704  | 6.3431  | C | -3.9446  | 2.4667  | 8.4751  |
| O  | -5.7194 | -1.5716 | 5.6345  | H | -3.8213  | 3.0945  | 7.5876  |
| O  | -4.9843 | 0.1255  | 4.3292  | H | -3.5042  | 2.9873  | 9.3336  |
| O  | -7.5264 | 0.3544  | 3.0239  | H | -3.3854  | 1.5361  | 8.3184  |
| O  | -8.2652 | -1.3669 | 4.2958  | C | -5.5887  | 1.3209  | 10.0113 |
| O  | -5.8458 | 2.0486  | 6.4051  | H | -5.1670  | 1.8557  | 10.8704 |
| O  | -6.6378 | 0.3641  | 7.6970  | H | -6.6409  | 1.1061  | 10.2228 |
| C  | -9.3086 | 1.7202  | 5.8259  | H | -5.0630  | 0.3655  | 9.9104  |
| C  | -6.0209 | 1.4568  | 7.5257  | C | -6.2060  | 3.5066  | 8.9076  |
| C  | -4.8947 | -1.0502 | 4.8290  | H | -7.2768  | 3.3254  | 9.0636  |
| C  | -8.0875 | -0.7835 | 3.1836  | H | -5.8247  | 4.0539  | 9.7775  |
| C  | -5.4350 | 2.1778  | 8.7471  | H | -6.0869  | 4.1378  | 8.0217  |



|   |          |        |        |   |         |        |         |
|---|----------|--------|--------|---|---------|--------|---------|
| C | -10.1836 | 3.9209 | 6.6143 | H | -6.8614 | 4.3556 | 5.5095  |
| H | -9.5502  | 4.4522 | 5.8979 | C | -7.3580 | 5.3308 | 1.1276  |
| H | -11.0821 | 4.5223 | 6.7943 | C | -7.4994 | 5.1617 | -0.2626 |
| H | -9.6359  | 3.8366 | 7.5611 | H | -8.1044 | 4.3602 | -0.6691 |
| C | -11.4923 | 1.8182 | 7.0910 | C | -6.8670 | 6.0203 | -1.1549 |
| H | -12.3988 | 2.4133 | 7.2515 | H | -6.9854 | 5.8838 | -2.2260 |
| H | -11.7906 | 0.8285 | 6.7315 | C | -6.0761 | 7.0841 | -0.6938 |
| H | -10.9901 | 1.6908 | 8.0559 | C | -5.9382 | 7.2741 | 0.6855  |
| C | -11.3097 | 2.6805 | 4.7240 | C | -6.5713 | 6.4032 | 1.5756  |
| H | -11.5718 | 1.7022 | 4.3039 | H | -6.4323 | 6.5600 | 2.6389  |
| H | -12.2360 | 3.2519 | 4.8559 | C | -4.3033 | 4.8196 | 3.2847  |
| H | -10.6798 | 3.2030 | 4.0016 | H | -3.8388 | 4.3512 | 2.4231  |

**A-B-ts-Piv-MeO-NO2**

**Energy (POTENTIAL) = -3567.423363 Eh**

| Atom | X        | Y      | Z       |    |          |         |         |
|------|----------|--------|---------|----|----------|---------|---------|
| S    | -5.2590  | 1.6955 | -0.2305 | H  | -5.3358  | 8.0823  | 1.0839  |
| O    | -6.4522  | 1.2924 | -0.9939 | N  | -7.9130  | 4.4438  | 2.0961  |
| O    | -4.3134  | 0.6478 | 0.2119  | H  | -4.0447  | 7.5895  | 5.2323  |
| N    | -10.1171 | 3.8941 | 1.6671  | C  | -4.3668  | 2.9419  | -1.1643 |
| N    | -5.8139  | 2.6584 | 1.0633  | H  | -5.0410  | 3.7823  | -1.3450 |
| C    | -13.4345 | 2.1199 | -0.1266 | H  | -3.4959  | 3.2596  | -0.5862 |
| C    | -13.5849 | 3.3168 | 0.5895  | H  | -4.0570  | 2.4816  | -2.1065 |
| H    | -14.5651 | 3.7710 | 0.6728  | Rh | -6.7184  | 1.4509  | 4.6405  |
| C    | -12.4872 | 3.9096 | 1.1824  | Rh | -7.3974  | -0.4150 | 6.1049  |
| H    | -12.6169 | 4.8377 | 1.7267  | O  | -8.5223  | 2.3625  | 5.1244  |
| C    | -11.1947 | 3.3200 | 1.0788  | O  | -9.1578  | 0.6284  | 6.4362  |
| C    | -11.0693 | 2.1089 | 0.3395  | O  | -5.6142  | -1.3655 | 5.6346  |
| H    | -10.1046 | 1.6273 | 0.2417  | O  | -5.0015  | 0.3427  | 4.2853  |
| C    | -12.1714 | 1.5217 | -0.2496 | O  | -7.6322  | 0.4433  | 3.0770  |
| H    | -12.0675 | 0.5960 | -0.8028 | O  | -8.2353  | -1.2822 | 4.4156  |
| C    | -10.1598 | 5.0809 | 2.5251  | O  | -5.8440  | 2.2769  | 6.3275  |
| H    | -10.9397 | 5.0014 | 3.2894  | O  | -6.5034  | 0.5873  | 7.6851  |
| H    | -10.3420 | 5.9841 | 1.9291  | C  | -9.3582  | 1.7448  | 5.8750  |
| C    | -8.7480  | 5.0753 | 3.1382  | C  | -5.9302  | 1.6954  | 7.4624  |
| H    | -8.3957  | 6.0704 | 3.4021  | C  | -4.8460  | -0.8239 | 4.7873  |
| H    | -8.7180  | 4.4353 | 4.0204  | C  | -8.1759  | -0.6947 | 3.2933  |
| C    | -5.8953  | 2.9263 | 3.4572  | C  | -5.2891  | 2.4451  | 8.6381  |
| C    | -5.4036  | 2.3182 | 2.2366  | C  | -3.6477  | -1.6155 | 4.2529  |
| H    | -4.7166  | 1.4756 | 2.3895  | C  | -8.8646  | -1.3767 | 2.1049  |
| C    | -8.7463  | 3.3413 | 1.6429  | C  | -10.7284 | 2.4107  | 6.0564  |
| H    | -8.4575  | 2.9831 | 0.6594  | N  | -14.5811 | 1.5016  | -0.7364 |
| H    | -8.6583  | 2.5119 | 2.3507  | O  | -15.6867 | 2.0543  | -0.6201 |
| C    | -5.4070  | 4.1843 | 3.9175  | O  | -14.4228 | 0.4382  | -1.3569 |
| C    | -5.5382  | 6.0501 | 5.4800  | O  | -5.4991  | 7.8630  | -1.6550 |
| H    | -6.0179  | 6.5430 | 6.3204  | C  | -4.6731  | 8.9441  | -1.2330 |
| C    | -6.0137  | 4.8275 | 5.0310  | H  | -4.3209  | 9.4273  | -2.1470 |
|      |          |        |         | H  | -5.2347  | 9.6730  | -0.6338 |

|   |          |         |         |
|---|----------|---------|---------|
| H | -3.8087  | 8.5896  | -0.6559 |
| C | -3.4154  | -2.8832 | 5.0871  |
| H | -2.5593  | -3.4355 | 4.6824  |
| H | -3.2007  | -2.6375 | 6.1330  |
| H | -4.2894  | -3.5415 | 5.0672  |
| C | -2.3929  | -0.7220 | 4.2800  |
| H | -1.5354  | -1.2758 | 3.8803  |
| H | -2.5351  | 0.1780  | 3.6749  |
| H | -2.1512  | -0.4135 | 5.3046  |
| C | -3.9956  | -1.9937 | 2.7935  |
| H | -3.1799  | -2.5857 | 2.3620  |
| H | -4.9111  | -2.5970 | 2.7521  |
| H | -4.1433  | -1.1046 | 2.1720  |
| C | -8.3085  | -0.8418 | 0.7776  |
| H | -8.8311  | -1.3164 | -0.0615 |
| H | -8.4281  | 0.2392  | 0.6928  |
| H | -7.2396  | -1.0582 | 0.6807  |
| C | -8.6529  | -2.8988 | 2.1894  |
| H | -9.0532  | -3.3069 | 3.1216  |
| H | -9.1595  | -3.3889 | 1.3498  |
| H | -7.5868  | -3.1512 | 2.1363  |
| C | -10.3694 | -1.0445 | 2.2352  |
| H | -10.5412 | 0.0367  | 2.2112  |
| H | -10.9225 | -1.4941 | 1.4022  |
| H | -10.7778 | -1.4388 | 3.1723  |
| C | -3.8213  | 2.7531  | 8.2769  |
| H | -3.7573  | 3.3628  | 7.3708  |
| H | -3.3432  | 3.2997  | 9.0984  |
| H | -3.2553  | 1.8283  | 8.1098  |
| C | -5.3536  | 1.6047  | 9.9210  |
| H | -4.8874  | 2.1570  | 10.7454 |
| H | -6.3878  | 1.3792  | 10.1996 |
| H | -4.8221  | 0.6548  | 9.8006  |
| C | -6.0716  | 3.7634  | 8.8259  |
| H | -7.1299  | 3.5670  | 9.0384  |
| H | -5.6544  | 4.3257  | 9.6695  |
| H | -6.0089  | 4.3874  | 7.9295  |
| C | -10.5308 | 3.8879  | 6.4483  |
| H | -10.0006 | 4.4442  | 5.6719  |
| H | -11.5066 | 4.3626  | 6.6029  |
| H | -9.9595  | 3.9741  | 7.3810  |
| C | -11.5455 | 1.6903  | 7.1389  |
| H | -12.5237 | 2.1746  | 7.2410  |
| H | -11.7073 | 0.6390  | 6.8837  |
| H | -11.0409 | 1.7294  | 8.1105  |
| C | -11.4503 | 2.3058  | 4.6933  |
| H | -11.6433 | 1.2585  | 4.4327  |

|   |          |        |        |
|---|----------|--------|--------|
| H | -12.4132 | 2.8279 | 4.7367 |
| H | -10.8495 | 2.7476 | 3.8958 |

**B-Piv-MeO-NO2**

**Energy (POTENTIAL) = -3567.4429911 Eh**

| Atom | X        | Y      | Z       |
|------|----------|--------|---------|
| S    | -4.7694  | 1.9298 | 0.3678  |
| O    | -5.0629  | 0.5093 | 0.0806  |
| O    | -3.4475  | 2.2494 | 0.9569  |
| N    | -10.1152 | 3.5235 | 1.7857  |
| N    | -6.0363  | 2.6122 | 1.2122  |
| C    | -12.5099 | 2.6430 | -1.5176 |
| C    | -12.8784 | 3.6694 | -0.6398 |
| H    | -13.7846 | 4.2339 | -0.8234 |
| C    | -12.0848 | 3.9565 | 0.4563  |
| H    | -12.3868 | 4.7497 | 1.1298  |
| C    | -10.8937 | 3.2249 | 0.7004  |
| C    | -10.5511 | 2.1775 | -0.1955 |
| H    | -9.6722  | 1.5695 | -0.0240 |
| C    | -11.3466 | 1.8965 | -1.2908 |
| H    | -11.0779 | 1.0967 | -1.9702 |
| C    | -10.3587 | 4.6529 | 2.6859  |
| H    | -11.2501 | 4.5059 | 3.3041  |
| H    | -10.4706 | 5.5814 | 2.1157  |
| C    | -9.1004  | 4.6675 | 3.5502  |
| H    | -8.8425  | 5.6499 | 3.9287  |
| H    | -9.1642  | 3.9496 | 4.3633  |
| C    | -6.7002  | 3.6798 | 3.3005  |
| C    | -5.7731  | 3.0618 | 2.4200  |
| H    | -4.7688  | 2.9578 | 2.8343  |
| C    | -8.8171  | 2.9523 | 2.0559  |
| H    | -8.3145  | 2.5246 | 1.1992  |
| H    | -8.8404  | 2.2180 | 2.8547  |
| C    | -6.1678  | 4.7030 | 4.2596  |
| C    | -6.3328  | 5.9870 | 6.3258  |
| H    | -6.8426  | 6.1782 | 7.2665  |
| C    | -6.7944  | 4.9717 | 5.4905  |
| H    | -7.6272  | 4.3589 | 5.8112  |
| C    | -7.7305  | 5.1694 | 1.5481  |
| C    | -7.7912  | 4.8663 | 0.1834  |
| H    | -8.0808  | 3.8887 | -0.1720 |
| C    | -7.4818  | 5.8383 | -0.7588 |
| H    | -7.5308  | 5.6086 | -1.8183 |
| C    | -7.1009  | 7.1292 | -0.3605 |
| C    | -7.0543  | 7.4352 | 1.0058  |
| C    | -7.3735  | 6.4575 | 1.9490  |
| H    | -7.3252  | 6.7270 | 2.9955  |

|    |          |         |         |   |          |         |        |
|----|----------|---------|---------|---|----------|---------|--------|
| C  | -5.0238  | 5.4544  | 3.9284  | H | -5.2399  | 4.1196  | 8.5270 |
| H  | -4.5302  | 5.2883  | 2.9753  | H | -3.4856  | 4.0562  | 8.7862 |
| C  | -4.5332  | 6.4419  | 4.7856  | H | -4.1456  | 4.1118  | 7.1372 |
| H  | -3.6472  | 7.0049  | 4.5040  | C | -8.3326  | -1.0688 | 0.8662 |
| C  | -5.1980  | 6.7268  | 5.9800  | H | -8.9528  | -1.4623 | 0.0523 |
| H  | -6.7751  | 8.4224  | 1.3530  | H | -8.1805  | 0.0010  | 0.7061 |
| N  | -8.0231  | 4.1306  | 2.6055  | H | -7.3498  | -1.5506 | 0.8138 |
| H  | -4.8305  | 7.5079  | 6.6402  | C | -9.1719  | -2.8605 | 2.4283 |
| C  | -4.9128  | 2.8328  | -1.1801 | H | -9.6670  | -3.0838 | 3.3779 |
| H  | -5.9119  | 2.6752  | -1.5913 | H | -9.7760  | -3.2826 | 1.6164 |
| H  | -4.7375  | 3.8937  | -0.9898 | H | -8.1984  | -3.3636 | 2.4262 |
| H  | -4.1552  | 2.4343  | -1.8605 | C | -10.3971 | -0.6600 | 2.2744 |
| Rh | -6.7661  | 1.5235  | 4.6060  | H | -11.0340 | -1.0371 | 1.4659 |
| Rh | -7.0107  | -0.4763 | 5.9917  | H | -10.8991 | -0.8637 | 3.2278 |
| O  | -8.6226  | 2.1149  | 5.3284  | H | -10.3093 | 0.4248  | 2.1603 |
| O  | -8.7941  | 0.3250  | 6.6998  | C | -2.6496  | -1.9758 | 4.8040 |
| O  | -5.2410  | -1.1612 | 5.1863  | H | -1.7240  | -2.3808 | 4.3782 |
| O  | -4.9361  | 0.7466  | 4.0065  | H | -2.4008  | -1.4848 | 5.7525 |
| O  | -7.7147  | 0.4410  | 3.1165  | H | -3.3234  | -2.8097 | 5.0202 |
| O  | -8.0578  | -1.3631 | 4.4363  | C | -3.6759  | -1.7110 | 2.5077 |
| O  | -5.7368  | 2.3790  | 6.1924  | H | -4.1324  | -1.0213 | 1.7902 |
| O  | -5.9010  | 0.4983  | 7.4393  | H | -2.7818  | -2.1472 | 2.0456 |
| C  | -9.2370  | 1.3967  | 6.1915  | H | -4.3841  | -2.5233 | 2.7116 |
| C  | -5.4297  | 1.6537  | 7.1928  | C | -2.2925  | 0.1550  | 3.5046 |
| C  | -4.5814  | -0.4145 | 4.3940  | H | -2.0295  | 0.7046  | 4.4169 |
| C  | -8.1829  | -0.7227 | 3.3475  | H | -1.3699  | -0.2667 | 3.0872 |
| C  | -4.3319  | 2.1733  | 8.1289  | H | -2.7076  | 0.8613  | 2.7822 |
| C  | -3.2804  | -0.9820 | 3.8144  | C | -10.5053 | 3.3334  | 7.1334 |
| C  | -9.0127  | -1.3478 | 2.2193  | H | -10.1161 | 4.0133  | 6.3697 |
| C  | -10.6296 | 1.8907  | 6.6017  | H | -11.4908 | 3.6983  | 7.4455 |
| N  | -13.3418 | 2.3455  | -2.6605 | H | -9.8368  | 3.3775  | 8.0019 |
| O  | -12.9967 | 1.4289  | -3.4192 | C | -11.2354 | 0.9848  | 7.6828 |
| O  | -14.3662 | 3.0201  | -2.8365 | H | -12.2333 | 1.3504  | 7.9515 |
| O  | -6.8114  | 7.9982  | -1.3598 | H | -11.3304 | -0.0470 | 7.3301 |
| C  | -6.4198  | 9.3280  | -1.0126 | H | -10.6184 | 0.9773  | 8.5875 |
| H  | -6.2446  | 9.8419  | -1.9597 | C | -11.5133 | 1.8653  | 5.3347 |
| H  | -7.2131  | 9.8469  | -0.4601 | H | -11.6090 | 0.8459  | 4.9421 |
| H  | -5.4958  | 9.3317  | -0.4209 | H | -12.5177 | 2.2338  | 5.5734 |
| C  | -3.0100  | 1.6255  | 7.5359  | H | -11.0915 | 2.4929  | 4.5440 |
| H  | -2.1639  | 1.9385  | 8.1591  |   |          |         |        |
| H  | -3.0217  | 0.5302  | 7.4951  |   |          |         |        |
| H  | -2.8492  | 2.0077  | 6.5215  |   |          |         |        |
| C  | -4.5355  | 1.6313  | 9.5529  |   |          |         |        |
| H  | -3.7313  | 1.9924  | 10.2047 |   |          |         |        |
| H  | -5.4904  | 1.9719  | 9.9710  |   |          |         |        |
| H  | -4.5286  | 0.5380  | 9.5694  |   |          |         |        |
| C  | -4.3007  | 3.7084  | 8.1403  |   |          |         |        |

  

|                                              |         |        |        |
|----------------------------------------------|---------|--------|--------|
| <b>B_-Piv-MeO-NO2</b>                        |         |        |        |
| <b>Energy (POTENTIAL) = -3567.4471483 Eh</b> |         |        |        |
| Atom                                         | X       | Y      | Z      |
| S                                            | -5.9460 | 2.7510 | 1.2079 |
| O                                            | -5.3355 | 3.8795 | 0.4545 |
| O                                            | -7.1076 | 2.0844 | 0.5927 |
| N                                            | -9.2007 | 6.1402 | 3.9618 |

|   |          |         |         |    |          |         |         |
|---|----------|---------|---------|----|----------|---------|---------|
| N | -6.4011  | 3.2882  | 2.7071  | H  | -4.9794  | 0.7124  | 2.0035  |
| C | -13.1512 | 5.9755  | 2.6264  | H  | -4.3308  | 1.2135  | 0.4010  |
| C | -12.8080 | 6.8148  | 3.6923  | Rh | -6.9421  | 1.6894  | 4.2998  |
| H | -13.5731 | 7.4085  | 4.1777  | Rh | -7.4261  | -0.0752 | 5.9091  |
| C | -11.4953 | 6.8727  | 4.1261  | O  | -8.9875  | 1.9706  | 4.1197  |
| H | -11.2478 | 7.5171  | 4.9611  | O  | -9.4379  | 0.3166  | 5.6018  |
| C | -10.4906 | 6.0890  | 3.5023  | O  | -5.3723  | -0.3279 | 6.1086  |
| C | -10.8632 | 5.2508  | 2.4195  | O  | -4.9306  | 1.3136  | 4.6105  |
| H | -10.1317 | 4.6225  | 1.9269  | O  | -7.0118  | 0.2121  | 2.8725  |
| C | -12.1759 | 5.1981  | 1.9894  | O  | -7.4663  | -1.4371 | 4.3501  |
| H | -12.4554 | 4.5484  | 1.1692  | O  | -6.9749  | 3.0448  | 5.9358  |
| C | -8.7774  | 6.9284  | 5.1161  | O  | -7.3935  | 1.3541  | 7.3829  |
| H | -9.2803  | 6.6174  | 6.0389  | C  | -9.7828  | 1.2494  | 4.8093  |
| H | -8.9872  | 7.9886  | 4.9508  | C  | -7.2229  | 2.5788  | 7.1003  |
| C | -7.2795  | 6.6258  | 5.2048  | C  | -4.5817  | 0.3973  | 5.4288  |
| H | -6.6547  | 7.4715  | 5.4752  | C  | -7.2932  | -0.9933 | 3.1721  |
| H | -7.0839  | 5.8011  | 5.8844  | C  | -7.3771  | 3.5776  | 8.2585  |
| C | -5.6134  | 5.2817  | 3.9261  | C  | -3.0715  | 0.1638  | 5.5709  |
| C | -5.4427  | 4.0827  | 3.3248  | C  | -7.5102  | -1.9477 | 1.9924  |
| H | -4.4272  | 3.6906  | 3.4121  | C  | -11.2763 | 1.5791  | 4.6823  |
| C | -8.1502  | 5.2442  | 3.5483  | O  | -6.3772  | 9.8474  | -0.3553 |
| H | -8.1888  | 4.9767  | 2.5008  | C  | -6.5388  | 11.2528 | -0.1539 |
| H | -8.0859  | 4.3481  | 4.1654  | H  | -6.3789  | 11.7131 | -1.1307 |
| C | -4.5220  | 5.8512  | 4.7537  | H  | -7.5501  | 11.4919 | 0.1984  |
| C | -2.9915  | 7.6189  | 5.4284  | H  | -5.7999  | 11.6426 | 0.5574  |
| H | -2.6475  | 8.6450  | 5.3293  | N  | -14.5257 | 5.9023  | 2.1865  |
| C | -4.0591  | 7.1762  | 4.6467  | O  | -14.8052 | 5.1432  | 1.2485  |
| H | -4.5175  | 7.8586  | 3.9402  | O  | -15.3690 | 6.6010  | 2.7663  |
| C | -6.7680  | 7.1448  | 2.7647  | C  | -2.5383  | -0.2719 | 4.1895  |
| C | -6.9529  | 8.4961  | 3.0347  | H  | -2.7047  | 0.5074  | 3.4405  |
| H | -7.1795  | 8.8604  | 4.0276  | H  | -1.4618  | -0.4703 | 4.2504  |
| C | -6.8277  | 9.4390  | 2.0097  | H  | -3.0344  | -1.1888 | 3.8477  |
| H | -6.9728  | 10.4860 | 2.2460  | C  | -2.4140  | 1.4945  | 5.9920  |
| C | -6.5203  | 9.0215  | 0.7088  | H  | -2.8050  | 1.8375  | 6.9582  |
| C | -6.3334  | 7.6518  | 0.4523  | H  | -1.3307  | 1.3592  | 6.0944  |
| C | -6.4521  | 6.7193  | 1.4705  | H  | -2.5953  | 2.2773  | 5.2506  |
| H | -6.2774  | 5.6721  | 1.2484  | C  | -2.7813  | -0.9233 | 6.6150  |
| C | -3.8786  | 4.9890  | 5.6634  | H  | -3.1622  | -0.6394 | 7.6017  |
| H | -4.2527  | 3.9772  | 5.7785  | H  | -3.2429  | -1.8760 | 6.3367  |
| C | -2.7968  | 5.4291  | 6.4264  | H  | -1.6987  | -1.0765 | 6.6959  |
| H | -2.3144  | 4.7428  | 7.1174  | C  | -6.5602  | -1.5846 | 0.8376  |
| C | -2.3522  | 6.7487  | 6.3167  | H  | -6.7441  | -2.2508 | -0.0138 |
| H | -6.0853  | 7.3346  | -0.5556 | H  | -6.7103  | -0.5509 | 0.5152  |
| N | -6.8932  | 6.0802  | 3.8299  | H  | -5.5117  | -1.7025 | 1.1381  |
| H | -1.5171  | 7.0976  | 6.9180  | C  | -7.2986  | -3.4057 | 2.4269  |
| C | -4.6184  | 1.5433  | 1.4029  | H  | -7.9814  | -3.6854 | 3.2345  |
| H | -3.7733  | 2.0377  | 1.8859  | H  | -7.4788  | -4.0729 | 1.5758  |

|   |          |         |         |   |          |        |        |
|---|----------|---------|---------|---|----------|--------|--------|
| H | -6.2727  | -3.5699 | 2.7774  | H | -10.9042 | 6.9932 | 0.3405 |
| C | -8.9771  | -1.7314 | 1.5488  | C | -9.1261  | 5.9336 | 5.7535 |
| H | -9.2124  | -2.3960 | 0.7090  | H | -9.4540  | 5.2479 | 6.5373 |
| H | -9.6729  | -1.9538 | 2.3667  | H | -9.6214  | 6.8904 | 5.9018 |
| H | -9.1382  | -0.6970 | 1.2267  | C | -7.5615  | 6.0644 | 5.7845 |
| C | -11.6480 | 1.6266  | 3.1871  | H | -7.2810  | 7.0149 | 6.2439 |
| H | -12.7041 | 1.8981  | 3.0740  | H | -7.1470  | 5.2627 | 6.3907 |
| H | -11.0430 | 2.3627  | 2.6529  | C | -5.6394  | 5.2963 | 4.4426 |
| H | -11.4957 | 0.6487  | 2.7141  | C | -5.3343  | 4.2039 | 3.6998 |
| C | -12.1358 | 0.5340  | 5.4070  | H | -4.2823  | 3.9123 | 3.7078 |
| H | -11.8901 | 0.4834  | 6.4722  | C | -8.6155  | 4.5027 | 4.0023 |
| H | -13.1953 | 0.7992  | 5.3103  | H | -8.6054  | 4.1722 | 2.9764 |
| H | -11.9930 | -0.4644 | 4.9793  | H | -8.1383  | 3.8701 | 4.7324 |
| C | -11.4797 | 2.9687  | 5.3263  | C | -4.6058  | 5.9400 | 5.2898 |
| H | -12.5264 | 3.2794  | 5.2281  | C | -3.5913  | 7.9183 | 6.2947 |
| H | -11.2276 | 2.9469  | 6.3938  | H | -3.5944  | 8.9953 | 6.4420 |
| H | -10.8531 | 3.7197  | 4.8398  | C | -4.5825  | 7.3317 | 5.5073 |
| C | -6.1686  | 4.5302  | 8.2831  | H | -5.3338  | 7.9634 | 5.0453 |
| H | -6.0448  | 5.0655  | 7.3419  | C | -7.1801  | 6.9863 | 3.5069 |
| H | -6.2886  | 5.2664  | 9.0867  | C | -7.9312  | 8.1176 | 3.8418 |
| H | -5.2418  | 3.9745  | 8.4686  | H | -8.2762  | 8.2870 | 4.8534 |
| C | -7.4706  | 2.8453  | 9.6067  | C | -8.2699  | 9.0734 | 2.8766 |
| H | -7.6013  | 3.5784  | 10.4117 | H | -8.8705  | 9.9251 | 3.1733 |
| H | -8.3177  | 2.1537  | 9.6304  | C | -7.8465  | 8.9090 | 1.5555 |
| H | -6.5601  | 2.2719  | 9.8116  | C | -7.0417  | 7.8017 | 1.2304 |
| C | -8.6923  | 4.3467  | 8.0010  | C | -6.7140  | 6.8552 | 2.1866 |
| H | -9.5558  | 3.6771  | 8.0919  | H | -6.1213  | 5.9975 | 1.8944 |
| H | -8.8085  | 5.1548  | 8.7327  | C | -3.6061  | 5.1603 | 5.9072 |
| H | -8.7127  | 4.7770  | 6.9976  | H | -3.6339  | 4.0802 | 5.8052 |

**B-C-ts-Piv-MeO-NO2**

**Energy (POTENTIAL) = -3567.4326218 Eh**

| Atom | X        | Y      | Z      |
|------|----------|--------|--------|
| S    | -5.7415  | 3.1645 | 1.4047 |
| O    | -5.1552  | 4.4183 | 0.8576 |
| O    | -6.8788  | 2.5808 | 0.6682 |
| N    | -9.4976  | 5.3923 | 4.4325 |
| N    | -6.2229  | 3.4126 | 2.9702 |
| C    | -12.2039 | 7.4708 | 1.9937 |
| C    | -12.4554 | 7.3554 | 3.3609 |
| H    | -13.3386 | 7.8085 | 3.7935 |
| C    | -11.5561 | 6.6529 | 4.1535 |
| H    | -11.7494 | 6.5479 | 5.2152 |
| C    | -10.4122 | 6.0797 | 3.5788 |
| C    | -10.1920 | 6.1760 | 2.1965 |
| H    | -9.3003  | 5.7632 | 1.7429 |
| C    | -11.0852 | 6.8803 | 1.4021 |

|    |         |         |        |
|----|---------|---------|--------|
| C  | -2.6093 | 5.7502  | 6.6831 |
| H  | -1.8542 | 5.1225  | 7.1495 |
| C  | -2.5959 | 7.1335  | 6.8833 |
| H  | -6.7002 | 7.6869  | 0.2060 |
| N  | -6.9724 | 5.8994  | 4.4384 |
| H  | -1.8259 | 7.5925  | 7.4975 |
| C  | -4.3736 | 1.9837  | 1.3881 |
| H  | -3.5607 | 2.3921  | 1.9921 |
| H  | -4.7157 | 1.0322  | 1.7867 |
| H  | -4.0503 | 1.8833  | 0.3483 |
| Rh | -6.6907 | 1.5068  | 4.1827 |
| Rh | -7.1426 | -0.5262 | 5.4546 |
| O  | -8.7479 | 1.7027  | 3.9627 |
| O  | -9.1608 | -0.0586 | 5.3219 |
| O  | -5.0808 | -0.8166 | 5.5014 |
| O  | -4.6809 | 1.1774  | 4.5037 |
| O  | -6.6712 | 0.2965  | 2.5173 |
| O  | -7.3103 | -1.5458 | 3.6585 |

|   |          |         |         |   |          |         |         |
|---|----------|---------|---------|---|----------|---------|---------|
| O | -6.7637  | 2.5405  | 6.0249  | H | -11.1601 | 1.3479  | 2.3888  |
| O | -6.9477  | 0.5967  | 7.1716  | H | -12.4582 | 2.2036  | 3.2463  |
| C | -9.5266  | 0.9268  | 4.6077  | H | -10.8359 | 2.9144  | 3.1474  |
| C | -6.7967  | 1.8549  | 7.1044  | C | -11.8571 | -0.0250 | 4.7132  |
| C | -4.3105  | 0.1072  | 5.0917  | H | -12.9252 | 0.2217  | 4.6980  |
| C | -7.0526  | -0.9157 | 2.5860  | H | -11.6553 | -0.7161 | 3.8862  |
| C | -6.6682  | 2.6074  | 8.4389  | H | -11.6353 | -0.5439 | 5.6499  |
| C | -2.8079  | -0.0218 | 5.3738  | C | -5.5191  | 3.6255  | 8.3416  |
| C | -7.2877  | -1.6356 | 1.2529  | H | -5.6846  | 4.3483  | 7.5420  |
| C | -11.0244 | 1.2593  | 4.5693  | H | -5.4229  | 4.1727  | 9.2868  |
| N | -13.1218 | 8.2479  | 1.1638  | H | -4.5659  | 3.1223  | 8.1430  |
| O | -12.8228 | 8.4285  | -0.0196 | C | -6.3915  | 1.6248  | 9.5884  |
| O | -14.1468 | 8.6916  | 1.6883  | H | -6.2945  | 2.1813  | 10.5282 |
| O | -8.1463  | 9.7479  | 0.5281  | H | -7.2020  | 0.8990  | 9.7010  |
| C | -9.0835  | 10.7968 | 0.7665  | H | -5.4618  | 1.0702  | 9.4216  |
| H | -9.2218  | 11.2982 | -0.1937 | C | -8.0096  | 3.3278  | 8.6927  |
| H | -10.0476 | 10.3988 | 1.1093  | H | -8.8346  | 2.6089  | 8.7629  |
| H | -8.7039  | 11.5207 | 1.4991  | H | -7.9616  | 3.8841  | 9.6361  |
| C | -2.5265  | 0.8747  | 6.6030  | H | -8.2392  | 4.0343  | 7.8915  |
| H | -3.1049  | 0.5425  | 7.4734  |   |          |         |         |
| H | -1.4621  | 0.8282  | 6.8624  |   |          |         |         |
| H | -2.7843  | 1.9189  | 6.3946  |   |          |         |         |
| C | -2.4337  | -1.4777 | 5.6885  |   |          |         |         |
| H | -2.6620  | -2.1366 | 4.8430  |   |          |         |         |
| H | -1.3589  | -1.5453 | 5.8937  |   |          |         |         |
| H | -2.9759  | -1.8494 | 6.5628  |   |          |         |         |
| C | -2.0029  | 0.4849  | 4.1633  |   |          |         |         |
| H | -0.9296  | 0.4043  | 4.3724  |   |          |         |         |
| H | -2.2193  | -0.1091 | 3.2672  |   |          |         |         |
| H | -2.2337  | 1.5305  | 3.9432  |   |          |         |         |
| C | -7.0453  | -3.1452 | 1.4087  |   |          |         |         |
| H | -7.2308  | -3.6510 | 0.4537  |   |          |         |         |
| H | -6.0095  | -3.3501 | 1.7050  |   |          |         |         |
| H | -7.7063  | -3.5801 | 2.1638  |   |          |         |         |
| C | -8.7690  | -1.3681 | 0.8936  |   |          |         |         |
| H | -8.9555  | -0.2942 | 0.7806  |   |          |         |         |
| H | -9.0169  | -1.8624 | -0.0533 |   |          |         |         |
| H | -9.4395  | -1.7561 | 1.6694  |   |          |         |         |
| C | -6.3731  | -1.0535 | 0.1618  |   |          |         |         |
| H | -6.5772  | -1.5513 | -0.7937 |   |          |         |         |
| H | -6.5335  | 0.0212  | 0.0425  |   |          |         |         |
| H | -5.3166  | -1.2165 | 0.4076  |   |          |         |         |
| C | -11.2832 | 2.1990  | 5.7709  |   |          |         |         |
| H | -12.3436 | 2.4753  | 5.8058  |   |          |         |         |
| H | -11.0242 | 1.7103  | 6.7170  |   |          |         |         |
| H | -10.6946 | 3.1199  | 5.6843  |   |          |         |         |
| C | -11.3857 | 1.9763  | 3.2579  |   |          |         |         |

  

| <b>C-Piv-MeO-NO2</b>                         |          |        |         |  |  |  |  |
|----------------------------------------------|----------|--------|---------|--|--|--|--|
| <b>Energy (POTENTIAL) = -3567.4444489 Eh</b> |          |        |         |  |  |  |  |
| Atom                                         | X        | Y      | Z       |  |  |  |  |
| S                                            | -7.0386  | 2.8703 | 1.5443  |  |  |  |  |
| O                                            | -6.9043  | 4.1064 | 0.7286  |  |  |  |  |
| O                                            | -8.2207  | 2.0235 | 1.2793  |  |  |  |  |
| N                                            | -9.8422  | 5.0080 | 3.7136  |  |  |  |  |
| N                                            | -7.0729  | 3.2747 | 3.1600  |  |  |  |  |
| C                                            | -11.1221 | 7.5975 | 0.6782  |  |  |  |  |
| C                                            | -11.8310 | 7.5625 | 1.8806  |  |  |  |  |
| H                                            | -12.6742 | 8.2229 | 2.0380  |  |  |  |  |
| C                                            | -11.4241 | 6.6756 | 2.8687  |  |  |  |  |
| H                                            | -11.9614 | 6.6321 | 3.8096  |  |  |  |  |
| C                                            | -10.3117 | 5.8544 | 2.6435  |  |  |  |  |
| C                                            | -9.6365  | 5.8656 | 1.4220  |  |  |  |  |
| H                                            | -8.7559  | 5.2516 | 1.2663  |  |  |  |  |
| C                                            | -10.0460 | 6.7487 | 0.4281  |  |  |  |  |
| H                                            | -9.5063  | 6.8111 | -0.5080 |  |  |  |  |
| C                                            | -9.6215  | 5.6086 | 5.0575  |  |  |  |  |
| H                                            | -10.1225 | 4.9810 | 5.7989  |  |  |  |  |
| H                                            | -10.0989 | 6.5838 | 5.0567  |  |  |  |  |
| C                                            | -8.1155  | 5.7043 | 5.4094  |  |  |  |  |
| H                                            | -8.0354  | 6.4292 | 6.2354  |  |  |  |  |
| H                                            | -7.7816  | 4.7397 | 5.7900  |  |  |  |  |
| C                                            | -6.0240  | 5.2659 | 4.1811  |  |  |  |  |
| C                                            | -5.9771  | 4.0711 | 3.5526  |  |  |  |  |
| H                                            | -4.9985  | 3.6093 | 3.4418  |  |  |  |  |

|    |          |         |        |   |          |         |         |
|----|----------|---------|--------|---|----------|---------|---------|
| C  | -9.4962  | 3.7738  | 3.5075 | N | -11.4796 | 8.6008  | -0.3264 |
| H  | -9.6632  | 3.3163  | 2.5406 | O | -12.3228 | 9.4498  | -0.0206 |
| H  | -9.2323  | 3.1521  | 4.3485 | O | -10.9120 | 8.5604  | -1.4188 |
| C  | -4.8028  | 5.8157  | 4.8271 | O | -8.3061  | 10.1822 | 0.7236  |
| C  | -3.4994  | 7.6933  | 5.6826 | C | -9.3253  | 11.1396 | 0.9882  |
| H  | -3.4081  | 8.7631  | 5.8536 | H | -9.0379  | 11.8268 | 1.7956  |
| C  | -4.6512  | 7.1936  | 5.0725 | H | -9.4530  | 11.7069 | 0.0636  |
| H  | -5.4328  | 7.8835  | 4.7751 | H | -10.2779 | 10.6600 | 1.2490  |
| C  | -7.4296  | 7.1433  | 3.4803 | C | -2.2042  | 1.6106  | 3.6227  |
| C  | -8.2634  | 8.2060  | 3.8628 | H | -2.5567  | 2.6402  | 3.7302  |
| H  | -8.6980  | 8.2314  | 4.8558 | H | -1.1163  | 1.6347  | 3.4891  |
| C  | -8.5753  | 9.2443  | 2.9759 | H | -2.6502  | 1.1924  | 2.7134  |
| H  | -9.2578  | 10.0213 | 3.3015 | C | -1.9738  | 1.4102  | 6.1322  |
| C  | -8.0199  | 9.2615  | 1.6945 | H | -2.1894  | 0.7994  | 7.0152  |
| C  | -7.1017  | 8.2583  | 1.3418 | H | -0.8861  | 1.5131  | 6.0393  |
| C  | -6.8138  | 7.2178  | 2.2109 | H | -2.3978  | 2.4084  | 6.2945  |
| H  | -6.1651  | 6.4132  | 1.8851 | C | -1.9845  | -0.6645 | 4.6860  |
| C  | -3.7696  | 4.9557  | 5.2600 | H | -2.4025  | -1.1515 | 3.7963  |
| H  | -3.8964  | 3.8820  | 5.1713 | H | -0.8956  | -0.6204 | 4.5680  |
| C  | -2.6142  | 5.4583  | 5.8559 | H | -2.2145  | -1.2867 | 5.5553  |
| H  | -1.8376  | 4.7690  | 6.1783 | C | -7.0133  | -1.6483 | 1.0495  |
| C  | -2.4687  | 6.8327  | 6.0685 | H | -7.3253  | -2.3525 | 0.2692  |
| H  | -6.6571  | 8.2853  | 0.3510 | H | -7.5106  | -0.6900 | 0.8780  |
| N  | -7.2421  | 6.0119  | 4.2906 | H | -5.9321  | -1.4927 | 0.9508  |
| H  | -1.5729  | 7.2250  | 6.5426 | C | -8.8968  | -2.4151 | 2.5482  |
| C  | -5.5535  | 1.8979  | 1.2116 | H | -9.2400  | -3.1253 | 1.7866  |
| H  | -4.6750  | 2.5078  | 1.4288 | H | -9.1696  | -2.8100 | 3.5338  |
| H  | -5.5753  | 0.9986  | 1.8233 | H | -9.4242  | -1.4664 | 2.3971  |
| H  | -5.5790  | 1.6499  | 0.1470 | C | -6.6454  | -3.5597 | 2.6597  |
| Rh | -6.8537  | 1.4698  | 4.6615 | H | -6.9270  | -4.2690 | 1.8726  |
| Rh | -6.5230  | -0.3416 | 6.2620 | H | -5.5567  | -3.4323 | 2.6296  |
| O  | -8.8830  | 1.3031  | 5.0489 | H | -6.9096  | -3.9947 | 3.6276  |
| O  | -8.5817  | -0.3663 | 6.5429 | C | -11.2660 | 1.8514  | 6.5399  |
| O  | -4.4909  | -0.1845 | 5.8941 | H | -11.0626 | 2.5773  | 5.7465  |
| O  | -4.7994  | 1.4763  | 4.3888 | H | -12.3429 | 1.8601  | 6.7435  |
| O  | -7.0389  | 0.0118  | 3.2204 | H | -10.7446 | 2.1784  | 7.4481  |
| O  | -6.7432  | -1.6793 | 4.6944 | C | -11.4890 | 0.0444  | 4.7859  |
| O  | -6.7061  | 2.7919  | 6.2747 | H | -11.1768 | -0.9570 | 4.4663  |
| O  | -6.3588  | 1.1017  | 7.7368 | H | -12.5797 | 0.0419  | 4.8973  |
| C  | -9.3078  | 0.4492  | 5.8991 | H | -11.2216 | 0.7529  | 3.9954  |
| C  | -6.5198  | 2.3277  | 7.4492 | C | -11.2029 | -0.5776 | 7.2174  |
| C  | -4.0689  | 0.6701  | 5.0527 | H | -10.7271 | -0.3271 | 8.1714  |
| C  | -6.9968  | -1.2217 | 3.5354 | H | -12.2894 | -0.5720 | 7.3636  |
| C  | -6.5479  | 3.3333  | 8.6092 | H | -10.8977 | -1.5925 | 6.9442  |
| C  | -2.5504  | 0.7588  | 4.8540 | C | -5.6903  | 4.5603  | 8.2527  |
| C  | -7.3651  | -2.2212 | 2.4330 | H | -6.0314  | 5.0358  | 7.3319  |
| C  | -10.8244 | 0.4315  | 6.1249 | H | -5.7397  | 5.2962  | 9.0641  |

|   |         |        |         |
|---|---------|--------|---------|
| H | -4.6404 | 4.2793 | 8.1140  |
| C | -6.0274 | 2.6884 | 9.9029  |
| H | -6.0529 | 3.4259 | 10.7138 |
| H | -6.6378 | 1.8301 | 10.1992 |
| H | -4.9938 | 2.3446 | 9.7864  |
| C | -8.0265 | 3.7470 | 8.7941  |
| H | -8.6548 | 2.8732 | 9.0060  |
| H | -8.1152 | 4.4417 | 9.6375  |
| H | -8.4154 | 4.2429 | 7.8999  |

**C-4-ts-Piv-MeO-NO2**

**Energy (POTENTIAL) = -3567.440832 Eh**

| Atom | X        | Y      | Z       |
|------|----------|--------|---------|
| S    | -7.1198  | 3.3596 | 1.5953  |
| O    | -6.9182  | 4.6702 | 0.9365  |
| O    | -8.3227  | 2.5898 | 1.2331  |
| N    | -9.5360  | 5.1670 | 4.1432  |
| N    | -7.1719  | 3.5704 | 3.2952  |
| C    | -11.3563 | 7.6902 | 1.3308  |
| C    | -11.9392 | 7.5375 | 2.5913  |
| H    | -12.8315 | 8.0935 | 2.8501  |
| C    | -11.3543 | 6.6665 | 3.4993  |
| H    | -11.8064 | 6.5314 | 4.4759  |
| C    | -10.1815 | 5.9708 | 3.1562  |
| C    | -9.6408  | 6.0996 | 1.8730  |
| H    | -8.7181  | 5.6019 | 1.6108  |
| C    | -10.2258 | 6.9652 | 0.9561  |
| H    | -9.7804  | 7.1140 | -0.0194 |
| C    | -9.3438  | 5.7270 | 5.4987  |
| H    | -9.7833  | 5.0450 | 6.2335  |
| H    | -9.8894  | 6.6652 | 5.5484  |
| C    | -7.8478  | 5.9400 | 5.8343  |
| H    | -7.7822  | 6.6982 | 6.6290  |
| H    | -7.4437  | 5.0111 | 6.2349  |
| C    | -5.9128  | 5.4091 | 4.4389  |
| C    | -6.0147  | 4.2471 | 3.7636  |
| H    | -5.0974  | 3.6847 | 3.6174  |
| C    | -9.0473  | 3.9433 | 3.8876  |
| H    | -9.4489  | 3.4217 | 3.0299  |
| H    | -8.8578  | 3.3576 | 4.7718  |
| C    | -4.6122  | 5.7999 | 5.0467  |
| C    | -3.0713  | 7.5180 | 5.8281  |
| H    | -2.8437  | 8.5705 | 5.9771  |
| C    | -4.2950  | 7.1531 | 5.2655  |
| H    | -5.0033  | 7.9241 | 4.9818  |
| C    | -7.2878  | 7.3678 | 3.8561  |
| C    | -8.1706  | 8.3881 | 4.2480  |

|    |          |         |         |
|----|----------|---------|---------|
| H  | -8.5946  | 8.3934  | 5.2453  |
| C  | -8.5526  | 9.4030  | 3.3627  |
| H  | -9.2693  | 10.1438 | 3.6989  |
| C  | -8.0268  | 9.4406  | 2.0690  |
| C  | -7.0664  | 8.4840  | 1.7040  |
| C  | -6.7028  | 7.4675  | 2.5747  |
| H  | -6.0153  | 6.7016  | 2.2383  |
| C  | -3.6791  | 4.8249  | 5.4547  |
| H  | -3.9323  | 3.7735  | 5.3677  |
| C  | -2.4547  | 5.1925  | 6.0116  |
| H  | -1.7547  | 4.4199  | 6.3194  |
| C  | -2.1415  | 6.5420  | 6.1980  |
| H  | -6.6424  | 8.5266  | 0.7047  |
| N  | -7.0294  | 6.2629  | 4.6785  |
| H  | -1.1904  | 6.8292  | 6.6385  |
| C  | -5.6451  | 2.3942  | 1.2174  |
| H  | -4.7618  | 2.9664  | 1.5034  |
| H  | -5.6933  | 1.4336  | 1.7238  |
| H  | -5.6649  | 2.2654  | 0.1314  |
| Rh | -6.9553  | 1.4449  | 4.5001  |
| Rh | -6.6589  | -0.5513 | 5.8457  |
| O  | -8.9923  | 1.1863  | 4.7642  |
| O  | -8.7024  | -0.5451 | 6.1880  |
| O  | -4.6327  | -0.4164 | 5.4351  |
| O  | -4.8944  | 1.5242  | 4.3063  |
| O  | -7.0511  | 0.1912  | 2.8615  |
| O  | -6.9698  | -1.6750 | 4.1354  |
| O  | -6.8792  | 2.5391  | 6.2739  |
| O  | -6.4115  | 0.6832  | 7.4819  |
| C  | -9.4244  | 0.2984  | 5.5719  |
| C  | -6.6129  | 1.9321  | 7.3665  |
| C  | -4.1840  | 0.5777  | 4.7830  |
| C  | -7.1113  | -1.0726 | 3.0258  |
| C  | -6.5571  | 2.7868  | 8.6395  |
| C  | -2.6647  | 0.6646  | 4.5954  |
| C  | -7.4357  | -1.8994 | 1.7775  |
| C  | -10.9438 | 0.2503  | 5.7662  |
| N  | -11.9112 | 8.6725  | 0.4050  |
| O  | -12.8474 | 9.3777  | 0.7973  |
| O  | -11.4113 | 8.7656  | -0.7191 |
| O  | -8.3775  | 10.3422 | 1.1002  |
| C  | -9.4395  | 11.2456 | 1.3814  |
| H  | -9.1695  | 11.9551 | 2.1756  |
| H  | -9.6201  | 11.7968 | 0.4558  |
| H  | -10.3592 | 10.7206 | 1.6724  |
| C  | -11.4639 | 1.6858  | 5.9830  |
| H  | -11.2454 | 2.3231  | 5.1212  |



|   |          |         |         |
|---|----------|---------|---------|
| H | -12.5495 | 1.6686  | 6.1333  |
| H | -11.0064 | 2.1403  | 6.8707  |
| C | -11.5400 | -0.3381 | 4.4673  |
| H | -11.1742 | -1.3573 | 4.2948  |
| H | -12.6330 | -0.3767 | 4.5445  |
| H | -11.2754 | 0.2745  | 3.5991  |
| C | -11.3134 | -0.6335 | 6.9663  |
| H | -10.8798 | -0.2440 | 7.8943  |
| H | -12.4032 | -0.6589 | 7.0825  |
| H | -10.9574 | -1.6592 | 6.8319  |
| C | -6.5735  | -1.4060 | 0.5996  |
| H | -6.8025  | -1.9942 | -0.2966 |
| H | -6.7694  | -0.3531 | 0.3802  |
| H | -5.5043  | -1.5212 | 0.8165  |
| C | -8.9313  | -1.6484 | 1.4734  |
| H | -9.2314  | -2.2209 | 0.5880  |
| H | -9.5633  | -1.9613 | 2.3134  |
| H | -9.1168  | -0.5867 | 1.2812  |
| C | -7.1878  | -3.3932 | 2.0304  |
| H | -7.4334  | -3.9649 | 1.1278  |
| H | -6.1383  | -3.5845 | 2.2806  |
| H | -7.8048  | -3.7671 | 2.8530  |
| C | -2.1156  | -0.7331 | 4.2536  |
| H | -1.0268  | -0.6842 | 4.1368  |
| H | -2.3479  | -1.4540 | 5.0422  |
| H | -2.5419  | -1.1049 | 3.3137  |
| C | -2.3061  | 1.6585  | 3.4794  |
| H | -2.6452  | 2.6710  | 3.7141  |
| H | -1.2179  | 1.6845  | 3.3491  |
| H | -2.7559  | 1.3606  | 2.5256  |
| C | -2.0815  | 1.1441  | 5.9444  |
| H | -0.9915  | 1.2323  | 5.8665  |
| H | -2.4836  | 2.1243  | 6.2248  |
| H | -2.3140  | 0.4356  | 6.7466  |
| C | -5.5315  | 3.9191  | 8.4325  |
| H | -5.7853  | 4.5442  | 7.5742  |
| H | -5.4963  | 4.5546  | 9.3252  |
| H | -4.5272  | 3.5117  | 8.2678  |
| C | -6.1524  | 1.9327  | 9.8504  |
| H | -6.1167  | 2.5627  | 10.7470 |
| H | -6.8684  | 1.1238  | 10.0265 |
| H | -5.1640  | 1.4837  | 9.7075  |
| C | -7.9697  | 3.3705  | 8.8630  |
| H | -8.7082  | 2.5688  | 8.9883  |
| H | -7.9789  | 3.9848  | 9.7708  |
| H | -8.2827  | 3.9956  | 8.0221  |

### H-Piv-MeO-NO2

Energy (POTENTIAL) = -3567.4705662 Eh

| Atom | X        | Y       | Z       |
|------|----------|---------|---------|
| S    | -6.8593  | 3.7811  | 0.9192  |
| O    | -5.5299  | 4.2806  | 0.5445  |
| O    | -8.0179  | 4.0103  | 0.0419  |
| N    | -9.2176  | 5.1862  | 3.7196  |
| N    | -7.2266  | 4.4855  | 2.4167  |
| C    | -11.5314 | 8.0413  | 1.7033  |
| C    | -11.6081 | 7.9388  | 3.0971  |
| H    | -12.2487 | 8.6125  | 3.6530  |
| C    | -10.8525 | 6.9853  | 3.7543  |
| H    | -10.9154 | 6.9271  | 4.8338  |
| C    | -10.0040 | 6.1034  | 3.0380  |
| C    | -9.9746  | 6.2047  | 1.6256  |
| H    | -9.3134  | 5.5808  | 1.0399  |
| C    | -10.7193 | 7.1686  | 0.9696  |
| H    | -10.6510 | 7.2707  | -0.1065 |
| C    | -8.7800  | 5.4606  | 5.0947  |
| H    | -8.2090  | 4.5927  | 5.4262  |
| H    | -9.6381  | 5.5469  | 5.7704  |
| C    | -7.9030  | 6.7327  | 5.2095  |
| H    | -8.5251  | 7.6241  | 5.2246  |
| H    | -7.3808  | 6.6960  | 6.1722  |
| C    | -6.0035  | 5.7427  | 4.1161  |
| C    | -6.1174  | 4.6827  | 3.2872  |
| H    | -5.3392  | 3.9310  | 3.2640  |
| C    | -8.5447  | 4.1250  | 3.0171  |
| H    | -9.1802  | 3.7586  | 2.2111  |
| H    | -8.3794  | 3.3108  | 3.7305  |
| C    | -4.9178  | 5.7977  | 5.1285  |
| C    | -3.3832  | 7.1099  | 6.4884  |
| H    | -3.0101  | 8.0804  | 6.8052  |
| C    | -4.4232  | 7.0409  | 5.5608  |
| H    | -4.8549  | 7.9512  | 5.1562  |
| C    | -7.1424  | 7.6361  | 2.9812  |
| C    | -8.0224  | 8.7317  | 3.0124  |
| H    | -8.5604  | 8.9881  | 3.9158  |
| C    | -8.2677  | 9.5162  | 1.8818  |
| H    | -8.9802  | 10.3295 | 1.9615  |
| C    | -7.6142  | 9.2429  | 0.6774  |
| C    | -6.6877  | 8.1930  | 0.6479  |
| C    | -6.4516  | 7.4102  | 1.7716  |
| H    | -5.7371  | 6.6024  | 1.6900  |
| C    | -4.3666  | 4.6273  | 5.6821  |
| H    | -4.7853  | 3.6651  | 5.4190  |
| C    | -3.3178  | 4.6981  | 6.5995  |



|    |          |         |         |    |          |         |         |
|----|----------|---------|---------|----|----------|---------|---------|
| H  | -10.5616 | -0.8906 | 3.9555  | Rh | -7.8532  | -2.5788 | 1.1380  |
| C  | -10.6375 | 1.0919  | 3.1515  | O  | -9.4774  | -0.0160 | 0.4579  |
| H  | -9.7023  | 0.9548  | 2.6346  | O  | -9.8726  | -2.2029 | 0.8602  |
| C  | -11.3503 | 2.3137  | 3.0578  | O  | -5.8058  | -2.8081 | 1.3469  |
| C  | -12.5335 | 2.4491  | 3.8257  | O  | -5.4332  | -0.5930 | 1.0780  |
| H  | -13.1043 | 3.3684  | 3.8081  | O  | -7.2540  | -0.5925 | -1.1950 |
| C  | -12.9930 | 1.4064  | 4.6144  | O  | -7.6772  | -2.7964 | -0.9101 |
| H  | -13.8994 | 1.5208  | 5.1963  | O  | -7.5219  | -0.0107 | 2.9068  |
| C  | -11.4286 | 4.7009  | 2.3489  | O  | -7.9324  | -2.2153 | 3.1779  |
| H  | -12.5225 | 4.6864  | 2.3064  | C  | -10.2320 | -1.0433 | 0.4797  |
| H  | -11.0866 | 5.2403  | 1.4651  | C  | -7.5828  | -1.0707 | 3.6135  |
| C  | -10.9674 | 5.4331  | 3.6275  | C  | -5.0443  | -1.7914 | 1.2719  |
| H  | -11.3150 | 6.4709  | 3.5942  | C  | -7.4008  | -1.7814 | -1.6277 |
| H  | -11.4289 | 4.9664  | 4.5029  | C  | -7.1654  | -1.0154 | 5.0922  |
| C  | -9.0184  | 4.1750  | 4.3665  | C  | -3.5306  | -2.0137 | 1.3690  |
| C  | -8.3833  | 3.2708  | 3.5885  | C  | -7.1706  | -2.0310 | -3.1224 |
| H  | -7.8764  | 2.4088  | 4.0010  | C  | -11.6590 | -0.9058 | -0.0642 |
| C  | -9.7381  | 3.1440  | 1.4189  | C  | -2.9094  | -0.9169 | 2.2541  |
| H  | -9.7648  | 3.8623  | 0.5983  | H  | -1.8236  | -1.0575 | 2.3105  |
| H  | -9.7260  | 2.1382  | 1.0018  | H  | -3.1100  | 0.0793  | 1.8504  |
| C  | -9.2675  | 3.9315  | 5.8040  | H  | -3.3110  | -0.9580 | 3.2740  |
| C  | -9.7326  | 2.4176  | 7.6515  | C  | -2.9835  | -1.9033 | -0.0732 |
| H  | -9.9286  | 1.4102  | 8.0092  | H  | -1.8991  | -2.0642 | -0.0718 |
| C  | -9.5195  | 2.6362  | 6.2903  | H  | -3.4403  | -2.6570 | -0.7260 |
| H  | -9.5822  | 1.8082  | 5.5929  | H  | -3.1861  | -0.9129 | -0.4942 |
| C  | -8.6583  | 6.2803  | 3.1559  | C  | -3.2184  | -3.4026 | 1.9464  |
| C  | -9.0999  | 7.1692  | 2.1644  | H  | -2.1324  | -3.5420 | 2.0014  |
| H  | -10.1347 | 7.1749  | 1.8436  | H  | -3.6287  | -3.5147 | 2.9563  |
| C  | -8.2259  | 8.0834  | 1.5590  | H  | -3.6359  | -4.1985 | 1.3225  |
| H  | -8.6185  | 8.7502  | 0.7996  | C  | -5.7632  | -2.6618 | -3.2405 |
| C  | -6.8793  | 8.1225  | 1.9270  | H  | -5.5393  | -2.8759 | -4.2922 |
| C  | -6.4271  | 7.2396  | 2.9226  | H  | -4.9932  | -1.9810 | -2.8586 |
| C  | -7.2958  | 6.3431  | 3.5261  | H  | -5.7058  | -3.5994 | -2.6772 |
| H  | -6.9175  | 5.6753  | 4.2918  | C  | -8.2343  | -3.0120 | -3.6493 |
| C  | -9.2793  | 5.0085  | 6.7084  | H  | -9.2424  | -2.5931 | -3.5455 |
| H  | -9.1066  | 6.0139  | 6.3359  | H  | -8.0574  | -3.2129 | -4.7123 |
| C  | -9.4974  | 4.7885  | 8.0679  | H  | -8.2028  | -3.9610 | -3.1069 |
| H  | -9.4937  | 5.6287  | 8.7573  | C  | -7.2269  | -0.7144 | -3.9119 |
| C  | -9.7198  | 3.4921  | 8.5452  | H  | -7.0572  | -0.9166 | -4.9759 |
| H  | -5.3815  | 7.2730  | 3.2148  | H  | -8.2052  | -0.2314 | -3.8072 |
| N  | -9.5238  | 5.3951  | 3.8301  | H  | -6.4639  | -0.0092 | -3.5697 |
| H  | -9.8950  | 3.3234  | 9.6044  | C  | -11.6552 | -1.6287 | -1.4327 |
| C  | -6.9334  | 4.6757  | 0.2917  | H  | -11.3955 | -2.6858 | -1.3185 |
| H  | -7.8616  | 4.7814  | -0.2739 | H  | -12.6498 | -1.5611 | -1.8890 |
| H  | -6.7736  | 5.5289  | 0.9508  | H  | -10.9337 | -1.1677 | -2.1186 |
| H  | -6.0902  | 4.5430  | -0.3915 | C  | -12.0465 | 0.5669  | -0.2585 |
| Rh | -7.4442  | -0.2215 | 0.8207  | H  | -13.0571 | 0.6254  | -0.6793 |

|   |          |         |         |
|---|----------|---------|---------|
| H | -12.0427 | 1.1080  | 0.6919  |
| H | -11.3597 | 1.0735  | -0.9434 |
| C | -12.6475 | -1.5969 | 0.8931  |
| H | -12.6534 | -1.1074 | 1.8731  |
| H | -13.6612 | -1.5430 | 0.4793  |
| H | -12.3881 | -2.6494 | 1.0381  |
| C | -6.0694  | -2.0895 | 5.2835  |
| H | -5.7278  | -2.0839 | 6.3249  |
| H | -6.4461  | -3.0876 | 5.0442  |
| H | -5.2040  | -1.8861 | 4.6406  |
| C | -6.5990  | 0.3589  | 5.4709  |
| H | -7.3656  | 1.1348  | 5.4346  |
| H | -6.2156  | 0.3250  | 6.4975  |
| H | -5.7814  | 0.6534  | 4.8054  |
| C | -8.3861  | -1.3547 | 5.9715  |
| H | -8.0825  | -1.3906 | 7.0243  |
| H | -9.1696  | -0.5959 | 5.8727  |
| H | -8.8116  | -2.3257 | 5.7005  |
| N | -12.7665 | -0.8888 | 5.4783  |
| O | -13.8036 | -0.7209 | 6.1340  |
| O | -12.1184 | -1.9442 | 5.4932  |
| O | -5.9383  | 8.9606  | 1.3962  |
| C | -6.3452  | 9.8459  | 0.3586  |
| H | -5.4503  | 10.4010 | 0.0680  |
| H | -6.7281  | 9.2984  | -0.5135 |
| H | -7.1104  | 10.5534 | 0.7052  |

#### 4-MeO-NO2

Energy (POTENTIAL) = -1962.0048002 Eh

| Atom | X        | Y       | Z       |
|------|----------|---------|---------|
| S    | -6.3626  | 1.6660  | -0.4658 |
| O    | -7.2444  | 1.1597  | -1.5275 |
| O    | -5.5814  | 0.7242  | 0.3442  |
| N    | -9.6564  | 3.2056  | 1.0076  |
| N    | -7.3275  | 2.5840  | 0.5868  |
| C    | -11.0266 | -0.3768 | 2.7006  |
| C    | -11.3646 | 0.8444  | 3.2939  |
| H    | -11.9695 | 0.8569  | 4.1924  |
| C    | -10.9099 | 2.0279  | 2.7400  |
| H    | -11.1640 | 2.9562  | 3.2349  |
| C    | -10.1070 | 2.0279  | 1.5694  |
| C    | -9.7743  | 0.7725  | 0.9936  |
| H    | -9.1665  | 0.7169  | 0.1000  |
| C    | -10.2299 | -0.4091 | 1.5503  |
| H    | -9.9753  | -1.3599 | 1.0976  |
| C    | -10.0886 | 4.5239  | 1.4851  |
| H    | -11.1278 | 4.4714  | 1.8174  |

|   |          |         |         |
|---|----------|---------|---------|
| H | -10.0733 | 5.1941  | 0.6221  |
| C | -9.1955  | 5.0867  | 2.6074  |
| H | -9.4442  | 6.1384  | 2.7856  |
| H | -9.3893  | 4.5489  | 3.5392  |
| C | -7.1890  | 3.7099  | 2.7617  |
| C | -6.9192  | 2.6839  | 1.9235  |
| H | -6.3638  | 1.8258  | 2.2822  |
| C | -8.5765  | 3.1970  | 0.0457  |
| H | -8.3852  | 4.2272  | -0.2524 |
| H | -8.8344  | 2.6188  | -0.8425 |
| C | -6.8991  | 3.6050  | 4.2106  |
| C | -6.2818  | 4.6861  | 6.3039  |
| H | -6.0338  | 5.5916  | 6.8520  |
| C | -6.5844  | 4.7637  | 4.9449  |
| H | -6.5678  | 5.7232  | 4.4368  |
| C | -7.0868  | 5.7938  | 1.4436  |
| C | -7.7301  | 6.8833  | 0.8151  |
| H | -8.7835  | 7.0769  | 0.9798  |
| C | -7.0299  | 7.7431  | -0.0264 |
| H | -7.5403  | 8.5757  | -0.5022 |
| C | -5.6668  | 7.5535  | -0.2837 |
| C | -5.0134  | 6.4816  | 0.3359  |
| C | -5.7141  | 5.6224  | 1.1848  |
| H | -5.1785  | 4.8073  | 1.6576  |
| C | -6.9362  | 2.3717  | 4.8886  |
| H | -7.2400  | 1.4750  | 4.3562  |
| C | -6.6233  | 2.2956  | 6.2460  |
| H | -6.6588  | 1.3338  | 6.7512  |
| C | -6.2935  | 3.4512  | 6.9602  |
| H | -3.9563  | 6.3019  | 0.1742  |
| N | -7.7739  | 4.9299  | 2.3127  |
| H | -6.0608  | 3.3919  | 8.0202  |
| C | -5.2400  | 2.8711  | -1.1807 |
| H | -5.8265  | 3.6370  | -1.6929 |
| H | -4.6503  | 3.3115  | -0.3748 |
| H | -4.5952  | 2.3420  | -1.8881 |
| N | -11.4890 | -1.6126 | 3.2896  |
| O | -11.1610 | -2.6808 | 2.7547  |
| O | -12.1946 | -1.5541 | 4.3066  |
| O | -5.0800  | 8.4497  | -1.1364 |
| C | -3.6999  | 8.2769  | -1.4372 |
| H | -3.5085  | 7.3089  | -1.9206 |
| H | -3.4395  | 9.0807  | -2.1298 |
| H | -3.0742  | 8.3606  | -0.5383 |

#### t-D-Piv-MeO-NO2

Energy (POTENTIAL) = -3567.4625573 Eh

| Atom | X        | Y      | Z       |    | X       | Y       | Z       |
|------|----------|--------|---------|----|---------|---------|---------|
| S    | -7.2298  | 3.4166 | -1.4472 | H  | -5.3575 | 6.6562  | 2.5966  |
| O    | -8.0672  | 4.1342 | -2.4294 | N  | -9.8363 | 6.0125  | 1.5854  |
| O    | -7.0369  | 1.9682 | -1.6153 | H  | -9.0241 | 1.5581  | 5.9268  |
| N    | -12.2592 | 4.5665 | 1.8599  | C  | -5.6500 | 4.2454  | -1.3399 |
| N    | -7.8528  | 3.6131 | 0.1705  | H  | -5.8148 | 5.2651  | -0.9903 |
| C    | -13.4986 | 2.5248 | 5.3180  | H  | -5.0082 | 3.6938  | -0.6574 |
| C    | -13.0112 | 1.8078 | 4.2170  | H  | -5.2403 | 4.2458  | -2.3538 |
| H    | -12.9590 | 0.7267 | 4.2588  | Rh | -4.9915 | 3.1242  | 2.2659  |
| C    | -12.6042 | 2.4821 | 3.0829  | Rh | -2.8491 | 2.7720  | 3.3090  |
| H    | -12.2406 | 1.9015 | 2.2452  | O  | -5.6292 | 1.3944  | 3.2015  |
| C    | -12.6546 | 3.9002 | 3.0079  | O  | -3.6020 | 1.0390  | 4.1346  |
| C    | -13.1645 | 4.5964 | 4.1355  | O  | -2.1726 | 4.4863  | 2.3879  |
| H    | -13.2031 | 5.6777 | 4.1441  | O  | -4.1519 | 4.7954  | 1.3453  |
| C    | -13.5792 | 3.9201 | 5.2696  | O  | -4.3093 | 1.9979  | 0.6807  |
| H    | -13.9473 | 4.4675 | 6.1289  | O  | -2.2784 | 1.7037  | 1.6272  |
| C    | -12.3067 | 6.0263 | 1.7518  | O  | -5.5404 | 4.2377  | 3.9174  |
| H    | -13.1569 | 6.4337 | 2.2988  | O  | -3.5501 | 3.8586  | 4.9192  |
| H    | -12.4520 | 6.2655 | 0.6925  | C  | -4.8058 | 0.7059  | 3.8876  |
| C    | -10.9986 | 6.6359 | 2.2443  | C  | -4.7286 | 4.3420  | 4.8937  |
| H    | -10.9931 | 7.7026 | 2.0114  | C  | -2.9345 | 5.0942  | 1.5670  |
| H    | -10.9489 | 6.5409 | 3.3380  | C  | -3.1086 | 1.5687  | 0.6722  |
| C    | -9.7822  | 4.5462 | 1.4551  | C  | -5.2285 | 5.0391  | 6.1632  |
| C    | -8.9220  | 4.3109 | 0.2229  | C  | -2.3160 | 6.2790  | 0.8136  |
| H    | -9.3215  | 4.8047 | -0.6693 | C  | -2.6246 | 0.9076  | -0.6213 |
| C    | -11.2168 | 4.0582 | 0.9838  | C  | -5.3199 | -0.6059 | 4.4916  |
| H    | -11.4122 | 4.4476 | -0.0200 | C  | -4.0621 | 5.7446  | 6.8747  |
| H    | -11.2229 | 2.9732 | 0.9266  | H  | -4.4274 | 6.2278  | 7.7883  |
| C    | -9.4161  | 3.7345 | 2.7073  | H  | -3.2746 | 5.0370  | 7.1485  |
| C    | -9.1057  | 1.5658 | 3.7678  | H  | -3.6199 | 6.5170  | 6.2342  |
| H    | -8.9947  | 0.4897 | 3.6756  | C  | -6.3357 | 6.0505  | 5.8262  |
| C    | -9.2540  | 2.3421 | 2.6193  | H  | -7.1760 | 5.5677  | 5.3227  |
| H    | -9.2648  | 1.8543 | 1.6499  | H  | -6.7018 | 6.5118  | 6.7511  |
| C    | -8.6173  | 6.7589 | 1.6015  | H  | -5.9619 | 6.8463  | 5.1727  |
| C    | -8.5868  | 8.0198 | 0.9852  | C  | -5.7973 | 3.9142  | 7.0617  |
| H    | -9.4806  | 8.3938 | 0.4937  | H  | -5.0229 | 3.1795  | 7.3095  |
| C    | -7.4321  | 8.8051 | 0.9763  | H  | -6.1746 | 4.3444  | 7.9971  |
| H    | -7.4556  | 9.7750 | 0.4922  | H  | -6.6233 | 3.3940  | 6.5646  |
| C    | -6.2594  | 8.3197 | 1.5702  | C  | -4.1461 | -1.5110 | 4.8971  |
| C    | -6.2673  | 7.0508 | 2.1612  | H  | -3.5084 | -1.0294 | 5.6440  |
| C    | -7.4276  | 6.2851 | 2.1832  | H  | -4.5337 | -2.4431 | 5.3245  |
| H    | -7.3854  | 5.3163 | 2.6608  | H  | -3.5230 | -1.7651 | 4.0322  |
| C    | -9.3894  | 4.3256 | 3.9761  | C  | -6.2107 | -1.3255 | 3.4616  |
| H    | -9.4770  | 5.3995 | 4.0770  | H  | -6.5995 | -2.2546 | 3.8944  |
| C    | -9.2437  | 3.5498 | 5.1286  | H  | -7.0559 | -0.7010 | 3.1616  |
| H    | -9.2397  | 4.0333 | 6.1013  | H  | -5.6413 | -1.5824 | 2.5600  |
| C    | -9.1165  | 2.1647 | 5.0305  | C  | -6.1479 | -0.2262 | 5.7397  |
|      |          |        |         | H  | -6.9832 | 0.4263  | 5.4723  |

|   |          |         |         |   |         |         |         |
|---|----------|---------|---------|---|---------|---------|---------|
| H | -6.5499  | -1.1329 | 6.2071  | C | -5.8204 | -4.1749 | -7.8067 |
| H | -5.5285  | 0.2938  | 6.4800  | C | -4.4156 | -4.3874 | -7.7834 |
| C | -0.9780  | 5.8162  | 0.2015  | C | -3.5387 | -3.4192 | -7.3172 |
| H | -0.5188  | 6.6451  | -0.3499 | H | -2.4731 | -3.6135 | -7.3558 |
| H | -0.2794  | 5.4858  | 0.9756  | C | -4.0407 | -2.1793 | -6.8646 |
| H | -1.1306  | 4.9857  | -0.4988 | C | -1.8533 | -0.9722 | -6.6215 |
| C | -3.2521  | 6.7780  | -0.2965 | H | -1.5373 | -1.0330 | -5.5728 |
| H | -4.2221  | 7.0788  | 0.1030  | H | -1.4264 | -1.8238 | -7.1540 |
| H | -2.8000  | 7.6461  | -0.7908 | C | -1.3239 | 0.3232  | -7.2404 |
| H | -3.4145  | 6.0026  | -1.0530 | H | -1.4657 | 0.2993  | -8.3258 |
| C | -2.0623  | 7.4002  | 1.8458  | H | -0.2544 | 0.4192  | -7.0548 |
| H | -1.5711  | 8.2473  | 1.3522  | C | -1.7076 | 2.1245  | -5.5607 |
| H | -3.0020  | 7.7614  | 2.2750  | C | -0.5340 | 1.7717  | -4.8422 |
| H | -1.4123  | 7.0487  | 2.6536  | H | 0.0933  | 0.9549  | -5.1745 |
| C | -1.4533  | -0.0449 | -0.3362 | C | -0.1764 | 2.4348  | -3.6815 |
| H | -1.1143  | -0.5016 | -1.2733 | H | 0.7150  | 2.1440  | -3.1389 |
| H | -0.6083  | 0.4835  | 0.1146  | C | -0.9786 | 3.4714  | -3.1934 |
| H | -1.7550  | -0.8486 | 0.3453  | C | -2.1375 | 3.8498  | -3.8847 |
| C | -3.7844  | 0.1493  | -1.2913 | H | -2.7529 | 4.6559  | -3.5041 |
| H | -4.6285  | 0.8104  | -1.5053 | C | -2.4908 | 3.1940  | -5.0471 |
| H | -3.4370  | -0.2937 | -2.2321 | H | -3.3902 | 3.5105  | -5.5577 |
| H | -4.1461  | -0.6617 | -0.6477 | C | -3.4424 | 1.4056  | -7.1952 |
| C | -2.1537  | 2.0673  | -1.5326 | H | -4.0094 | 2.3019  | -6.9589 |
| H | -1.3289  | 2.6210  | -1.0694 | H | -3.4262 | 1.3150  | -8.2854 |
| H | -1.8014  | 1.6656  | -2.4898 | C | -4.1676 | 0.1627  | -6.5815 |
| H | -2.9712  | 2.7683  | -1.7360 | C | -4.5522 | 0.4587  | -5.1313 |
| O | -5.0709  | 8.9936  | 1.6190  | C | -3.9264 | -0.2134 | -4.0722 |
| C | -4.9347  | 10.1858 | 0.8524  | H | -3.2352 | -1.0229 | -4.2740 |
| H | -3.8953  | 10.4998 | 0.9700  | C | -4.1792 | 0.1444  | -2.7460 |
| H | -5.1410  | 10.0050 | -0.2106 | H | -3.6730 | -0.3828 | -1.9419 |
| H | -5.5944  | 10.9820 | 1.2212  | C | -5.0819 | 1.1690  | -2.4590 |
| N | -13.9083 | 1.8227  | 6.5088  | H | -5.2837 | 1.4510  | -1.4292 |
| O | -13.8051 | 0.5872  | 6.5321  | C | -5.7292 | 1.8249  | -3.5092 |
| O | -14.3474 | 2.4817  | 7.4632  | H | -6.4502 | 2.6071  | -3.2987 |

**t-D-E-ts-Piv-MeO-NO2**

**Energy (POTENTIAL) = -3567.4356007 Eh**

| Atom | X       | Y       | Z       |
|------|---------|---------|---------|
| N    | -6.4287 | 0.5254  | -7.7878 |
| N    | -3.3148 | -1.0336 | -6.7057 |
| N    | -2.0605 | 1.4828  | -6.7345 |
| C    | -5.3089 | -0.1936 | -7.6044 |
| H    | -4.8035 | -0.5075 | -8.5195 |
| C    | -5.4664 | -2.0038 | -6.7571 |
| C    | -6.3291 | -3.0124 | -7.2628 |
| H    | -7.3979 | -2.8675 | -7.1746 |

|    |          |         |          |
|----|----------|---------|----------|
| C  | -5.8204  | -4.1749 | -7.8067  |
| C  | -4.4156  | -4.3874 | -7.7834  |
| C  | -3.5387  | -3.4192 | -7.3172  |
| H  | -2.4731  | -3.6135 | -7.3558  |
| C  | -4.0407  | -2.1793 | -6.8646  |
| C  | -1.8533  | -0.9722 | -6.6215  |
| H  | -1.5373  | -1.0330 | -5.5728  |
| H  | -1.4264  | -1.8238 | -7.1540  |
| C  | -1.3239  | 0.3232  | -7.2404  |
| H  | -1.4657  | 0.2993  | -8.3258  |
| H  | -0.2544  | 0.4192  | -7.0548  |
| C  | -1.7076  | 2.1245  | -5.5607  |
| C  | -0.5340  | 1.7717  | -4.8422  |
| H  | 0.0933   | 0.9549  | -5.1745  |
| C  | -0.1764  | 2.4348  | -3.6815  |
| H  | 0.7150   | 2.1440  | -3.1389  |
| C  | -0.9786  | 3.4714  | -3.1934  |
| C  | -2.1375  | 3.8498  | -3.8847  |
| H  | -2.7529  | 4.6559  | -3.5041  |
| C  | -2.4908  | 3.1940  | -5.0471  |
| H  | -3.3902  | 3.5105  | -5.5577  |
| C  | -3.4424  | 1.4056  | -7.1952  |
| H  | -4.0094  | 2.3019  | -6.9589  |
| H  | -3.4262  | 1.3150  | -8.2854  |
| C  | -4.1676  | 0.1627  | -6.5815  |
| C  | -4.5522  | 0.4587  | -5.1313  |
| C  | -3.9264  | -0.2134 | -4.0722  |
| H  | -3.2352  | -1.0229 | -4.2740  |
| C  | -4.1792  | 0.1444  | -2.7460  |
| H  | -3.6730  | -0.3828 | -1.9419  |
| C  | -5.0819  | 1.1690  | -2.4590  |
| H  | -5.2837  | 1.4510  | -1.4292  |
| C  | -5.7292  | 1.8249  | -3.5092  |
| H  | -6.4502  | 2.6071  | -3.2987  |
| C  | -5.4542  | 1.4866  | -4.8327  |
| H  | -5.9573  | 2.0165  | -5.6301  |
| S  | -6.6680  | 0.9102  | -9.4396  |
| O  | -7.1843  | 2.2873  | -9.4743  |
| O  | -5.4325  | 0.6293  | -10.2122 |
| H  | -3.9993  | -5.3163 | -8.1567  |
| C  | -7.9081  | -0.2283 | -10.0676 |
| H  | -7.5323  | -1.2435 | -9.9299  |
| H  | -8.8404  | -0.0805 | -9.5315  |
| H  | -8.0225  | -0.0033 | -11.1315 |
| H  | -5.8708  | -1.4634 | -5.9036  |
| Rh | -10.6401 | 0.3428  | -5.3296  |
| Rh | -8.5261  | 0.4353  | -6.5249  |

|   |          |         |         |   |          |         |          |
|---|----------|---------|---------|---|----------|---------|----------|
| O | -9.6764  | -0.6964 | -3.8381 | H | -9.9973  | -2.5005 | -9.8409  |
| O | -7.7211  | -0.7162 | -4.9687 | C | -10.1540 | -4.3675 | -6.8946  |
| O | -9.5568  | 1.4330  | -8.0108 | H | -10.6740 | -4.2762 | -5.9347  |
| O | -11.5267 | 1.3345  | -6.9108 | H | -10.4326 | -5.3272 | -7.3460  |
| O | -11.0109 | -1.4598 | -6.2837 | H | -9.0748  | -4.3861 | -6.7094  |
| O | -9.0628  | -1.3590 | -7.4265 | C | -11.3318 | 3.9392  | -8.6725  |
| O | -10.1769 | 2.1731  | -4.4945 | H | -11.7899 | 4.5578  | -9.4534  |
| O | -8.2309  | 2.2916  | -5.6395 | H | -11.8353 | 4.1550  | -7.7238  |
| C | -8.4836  | -1.1016 | -4.0246 | H | -10.2786 | 4.2272  | -8.5805  |
| C | -9.1292  | 2.7841  | -4.8863 | C | -12.9495 | 2.0591  | -9.1616  |
| C | -10.8043 | 1.6616  | -7.9041 | H | -13.4147 | 2.6264  | -9.9762  |
| C | -10.1809 | -1.9025 | -7.1381 | H | -13.0629 | 0.9909  | -9.3829  |
| C | -8.9777  | 4.2418  | -4.4292 | H | -13.4938 | 2.2724  | -8.2373  |
| C | -11.4655 | 2.4443  | -9.0446 | C | -10.7370 | 2.1673  | -10.3704 |
| C | -10.5450 | -3.2145 | -7.8483 | H | -10.8184 | 1.1095  | -10.6486 |
| C | -7.9688  | -2.1372 | -3.0139 | H | -11.1927 | 2.7624  | -11.1707 |
| C | -9.0299  | 4.2853  | -2.8886 | H | -9.6759  | 2.4201  | -10.3014 |
| H | -8.9478  | 5.3229  | -2.5444 | N | -0.6171  | 4.1449  | -1.9715  |
| H | -9.9716  | 3.8703  | -2.5163 | O | 0.4124   | 3.7865  | -1.3797  |
| H | -8.2066  | 3.7148  | -2.4431 | O | -1.3499  | 5.0564  | -1.5592  |
| C | -10.1762 | 5.0228  | -5.0135 | O | -6.7278  | -5.0792 | -8.2842  |
| H | -10.1240 | 6.0715  | -4.6980 | C | -6.2540  | -6.3184 | -8.8054  |
| H | -10.1649 | 4.9961  | -6.1091 | H | -7.1441  | -6.8623 | -9.1286  |
| H | -11.1260 | 4.6027  | -4.6687 | H | -5.5909  | -6.1679 | -9.6674  |
| C | -7.6676  | 4.8568  | -4.9429 | H | -5.7314  | -6.9067 | -8.0396  |
| H | -6.7902  | 4.3281  | -4.5600 |   |          |         |          |
| H | -7.6218  | 4.8343  | -6.0364 |   |          |         |          |
| H | -7.6034  | 5.9016  | -4.6171 |   |          |         |          |
| C | -6.6208  | -2.7269 | -3.4464 |   |          |         |          |
| H | -5.8564  | -1.9536 | -3.5418 |   |          |         |          |
| H | -6.2825  | -3.4516 | -2.6961 |   |          |         |          |
| H | -6.7048  | -3.2469 | -4.4061 |   |          |         |          |
| C | -9.0173  | -3.2660 | -2.9194 |   |          |         |          |
| H | -8.6728  | -4.0298 | -2.2124 |   |          |         |          |
| H | -9.9833  | -2.8847 | -2.5767 |   |          |         |          |
| H | -9.1653  | -3.7469 | -3.8943 |   |          |         |          |
| C | -7.8321  | -1.4306 | -1.6484 |   |          |         |          |
| H | -7.5059  | -2.1519 | -0.8894 |   |          |         |          |
| H | -7.0901  | -0.6263 | -1.6963 |   |          |         |          |
| H | -8.7885  | -1.0032 | -1.3300 |   |          |         |          |
| C | -12.0630 | -3.2459 | -8.1074 |   |          |         |          |
| H | -12.3323 | -4.1835 | -8.6074 |   |          |         |          |
| H | -12.6277 | -3.1766 | -7.1738 |   |          |         |          |
| H | -12.3703 | -2.4146 | -8.7535 |   |          |         |          |
| C | -9.7861  | -3.3481 | -9.1794 |   |          |         |          |
| H | -8.7060  | -3.4099 | -9.0298 |   |          |         |          |
| H | -10.1069 | -4.2645 | -9.6889 |   |          |         |          |

**D\_-Piv-MeO-NO2**

**Energy (POTENTIAL) = -3567.4656726 Eh**

| Atom | X        | Y      | Z      |
|------|----------|--------|--------|
| S    | -8.7621  | 4.9167 | 2.2049 |
| O    | -9.0111  | 6.3602 | 2.2426 |
| O    | -9.9137  | 4.0125 | 2.2229 |
| N    | -9.2502  | 7.0556 | 5.1242 |
| N    | -7.7388  | 4.3011 | 3.5007 |
| C    | -12.8076 | 4.8527 | 4.9422 |
| C    | -12.7689 | 6.1688 | 4.4653 |
| H    | -13.6672 | 6.6189 | 4.0600 |
| C    | -11.5929 | 6.8925 | 4.5315 |
| H    | -11.5939 | 7.9175 | 4.1830 |
| C    | -10.4072 | 6.3200 | 5.0665 |
| C    | -10.4746 | 4.9768 | 5.5295 |
| H    | -9.5916  | 4.4635 | 5.8876 |
| C    | -11.6533 | 4.2610 | 5.4726 |
| H    | -11.6819 | 3.2335 | 5.8124 |
| C    | -9.0827  | 8.3168 | 4.3902 |
| H    | -9.5172  | 9.1588 | 4.9480 |
| H    | -9.5884  | 8.2290 | 3.4302 |

|    |         |         |         |   |          |         |         |
|----|---------|---------|---------|---|----------|---------|---------|
| C  | -7.5813 | 8.5736  | 4.1552  | C | -4.6644  | 1.4989  | 4.1234  |
| H  | -7.4685 | 9.2981  | 3.3507  | C | -6.9523  | 0.4095  | 1.3296  |
| H  | -7.1303 | 9.0321  | 5.0465  | C | -7.4665  | 1.5879  | 8.0427  |
| C  | -6.8550 | 6.3508  | 4.8800  | C | -3.1976  | 1.9280  | 4.2474  |
| C  | -7.0538 | 4.9106  | 4.4008  | C | -6.7736  | 0.2144  | -0.1804 |
| H  | -6.5285 | 4.2069  | 5.0416  | C | -11.2386 | -0.1800 | 3.3825  |
| C  | -8.0758 | 6.6491  | 5.8466  | O | -3.8911  | 6.5350  | -0.8679 |
| H  | -8.2679 | 5.7841  | 6.4770  | C | -4.2009  | 7.2330  | -2.0694 |
| H  | -7.7602 | 7.4533  | 6.5194  | H | -4.0878  | 8.3189  | -1.9489 |
| C  | -5.6003 | 6.4040  | 5.7898  | H | -3.4855  | 6.8794  | -2.8154 |
| C  | -3.5261 | 7.4716  | 6.4685  | H | -5.2198  | 7.0121  | -2.4150 |
| H  | -2.7733 | 8.2377  | 6.3035  | N | -14.0394 | 4.1088  | 4.8946  |
| C  | -4.6243 | 7.3907  | 5.6084  | O | -14.0749 | 2.9852  | 5.4198  |
| H  | -4.7131 | 8.0893  | 4.7840  | O | -15.0215 | 4.6220  | 4.3363  |
| C  | -6.1192 | 7.1772  | 2.6477  | C | -3.1201  | 3.0491  | 5.3052  |
| C  | -6.4297 | 7.8905  | 1.4760  | H | -2.0822  | 3.3818  | 5.4220  |
| H  | -7.2725 | 8.5711  | 1.4620  | H | -3.7268  | 3.9107  | 5.0144  |
| C  | -5.7078 | 7.7141  | 0.2941  | H | -3.4750  | 2.6960  | 6.2809  |
| H  | -5.9950 | 8.2886  | -0.5794 | C | -2.7541  | 2.4724  | 2.8721  |
| C  | -4.6551 | 6.7916  | 0.2370  | H | -1.7152  | 2.8186  | 2.9255  |
| C  | -4.3429 | 6.0617  | 1.3903  | H | -2.8134  | 1.6936  | 2.1019  |
| C  | -5.0514 | 6.2556  | 2.5726  | H | -3.3834  | 3.3114  | 2.5598  |
| H  | -4.7518 | 5.6797  | 3.4399  | C | -2.3117  | 0.7454  | 4.6619  |
| C  | -5.4678 | 5.5219  | 6.8730  | H | -1.2697  | 1.0768  | 4.7406  |
| H  | -6.2206 | 4.7619  | 7.0557  | H | -2.6171  | 0.3410  | 5.6327  |
| C  | -4.3728 | 5.6016  | 7.7345  | H | -2.3597  | -0.0650 | 3.9276  |
| H  | -4.2908 | 4.9006  | 8.5606  | C | -8.1023  | 0.5845  | -0.8730 |
| C  | -3.3921 | 6.5753  | 7.5311  | H | -8.3847  | 1.6203  | -0.6620 |
| H  | -3.5293 | 5.3435  | 1.3549  | H | -8.0005  | 0.4667  | -1.9582 |
| N  | -6.8645 | 7.3458  | 3.8268  | H | -8.9174  | -0.0665 | -0.5348 |
| H  | -2.5357 | 6.6375  | 8.1967  | C | -5.6524  | 1.1710  | -0.6435 |
| C  | -7.7130 | 4.5311  | 0.8065  | H | -4.7092  | 0.9520  | -0.1281 |
| H  | -6.8015 | 5.1250  | 0.8627  | H | -5.4858  | 1.0529  | -1.7205 |
| H  | -7.4990 | 3.4623  | 0.8277  | H | -5.9131  | 2.2160  | -0.4475 |
| H  | -8.2934 | 4.8011  | -0.0810 | C | -6.3943  | -1.2375 | -0.5030 |
| Rh | -7.5121 | 2.0080  | 3.7121  | H | -6.2734  | -1.3537 | -1.5864 |
| Rh | -6.9605 | -0.3090 | 4.1535  | H | -5.4532  | -1.5200 | -0.0203 |
| O  | -9.4946 | 1.4325  | 3.6379  | H | -7.1686  | -1.9352 | -0.1674 |
| O  | -8.9685 | -0.7471 | 3.9516  | C | -8.3640  | 2.7942  | 8.3652  |
| O  | -4.9688 | 0.2807  | 4.3100  | H | -8.3426  | 2.9917  | 9.4432  |
| O  | -5.4903 | 2.4270  | 3.8292  | H | -8.0306  | 3.6972  | 7.8468  |
| O  | -7.3140 | 1.5757  | 1.7028  | H | -9.4032  | 2.6016  | 8.0748  |
| O  | -6.7269 | -0.5682 | 2.1064  | C | -7.9474  | 0.3524  | 8.8222  |
| O  | -7.6631 | 2.2900  | 5.7547  | H | -7.3157  | -0.5169 | 8.6202  |
| O  | -7.2133 | 0.1118  | 6.1674  | H | -7.9172  | 0.5603  | 9.8980  |
| C  | -9.7880 | 0.1963  | 3.7030  | H | -8.9787  | 0.0942  | 8.5544  |
| C  | -7.4679 | 1.2999  | 6.5372  | C | -5.9947  | 1.9016  | 8.4061  |



|   |          |         |        |
|---|----------|---------|--------|
| H | -5.6176  | 2.7535  | 7.8304 |
| H | -5.9186  | 2.1452  | 9.4723 |
| H | -5.3489  | 1.0399  | 8.2025 |
| C | -12.1934 | 0.8467  | 4.0149 |
| H | -11.9748 | 1.8578  | 3.6659 |
| H | -13.2296 | 0.6050  | 3.7537 |
| H | -12.1132 | 0.8401  | 5.1078 |
| C | -11.5641 | -1.5938 | 3.8863 |
| H | -12.6043 | -1.8401 | 3.6422 |
| H | -10.9152 | -2.3446 | 3.4258 |
| H | -11.4442 | -1.6639 | 4.9735 |
| C | -11.3539 | -0.1250 | 1.8404 |
| H | -10.6647 | -0.8361 | 1.3687 |
| H | -12.3747 | -0.3839 | 1.5350 |
| H | -11.1243 | 0.8789  | 1.4686 |

#### D-MeO-NO2

Energy (POTENTIAL) = -1961.993306 Eh

| Atom | X       | Y       | Z       |
|------|---------|---------|---------|
| N    | -6.5680 | 5.4652  | -4.5874 |
| N    | -3.1979 | 4.3711  | -4.1395 |
| N    | -2.2928 | 7.0887  | -3.8917 |
| C    | -5.3473 | 5.2229  | -4.8678 |
| H    | -5.0212 | 4.9298  | -5.8692 |
| C    | -3.4066 | 2.3227  | -2.7317 |
| C    | -3.8485 | 1.0162  | -2.5655 |
| H    | -3.6739 | 0.4831  | -1.6355 |
| C    | -4.5521 | 0.3664  | -3.5923 |
| C    | -4.7787 | 1.0393  | -4.7999 |
| C    | -4.3045 | 2.3439  | -4.9648 |
| H    | -4.4497 | 2.8352  | -5.9213 |
| C    | -3.6352 | 3.0156  | -3.9349 |
| C    | -1.9007 | 4.6957  | -3.5383 |
| H    | -1.9515 | 4.8022  | -2.4434 |
| H    | -1.2108 | 3.8787  | -3.7663 |
| C    | -1.3592 | 5.9835  | -4.1372 |
| H    | -1.2191 | 5.8583  | -5.2223 |
| H    | -0.3899 | 6.1977  | -3.6916 |
| C    | -1.8497 | 8.4001  | -3.8459 |
| C    | -0.5654 | 8.7172  | -3.3243 |
| H    | 0.0889  | 7.9343  | -2.9620 |
| C    | -0.1314 | 10.0256 | -3.2284 |
| H    | 0.8453  | 10.2499 | -2.8169 |
| C    | -0.9643 | 11.0695 | -3.6520 |
| C    | -2.2313 | 10.7931 | -4.1731 |
| H    | -2.8628 | 11.6050 | -4.5134 |
| C    | -2.6654 | 9.4815  | -4.2727 |

|   |         |         |         |
|---|---------|---------|---------|
| H | -3.6374 | 9.3016  | -4.7125 |
| C | -3.6410 | 6.8020  | -4.3717 |
| H | -4.3311 | 7.5689  | -4.0213 |
| H | -3.6509 | 6.8101  | -5.4728 |
| C | -4.2149 | 5.4331  | -3.8736 |
| C | -4.6803 | 5.4585  | -2.4105 |
| C | -4.1543 | 6.3688  | -1.4811 |
| H | -3.4382 | 7.1173  | -1.7968 |
| C | -4.5329 | 6.3234  | -0.1359 |
| H | -4.1118 | 7.0430  | 0.5615  |
| C | -5.4419 | 5.3629  | 0.3085  |
| H | -5.7370 | 5.3273  | 1.3540  |
| C | -5.9709 | 4.4478  | -0.6056 |
| H | -6.6814 | 3.6942  | -0.2764 |
| C | -5.5942 | 4.4944  | -1.9478 |
| H | -6.0218 | 3.7771  | -2.6380 |
| S | -7.6894 | 5.1982  | -5.8727 |
| O | -7.0082 | 4.9416  | -7.1559 |
| O | -8.6496 | 4.2046  | -5.3700 |
| H | -5.2976 | 0.5590  | -5.6213 |
| C | -8.4630 | 6.8130  | -5.9277 |
| H | -8.8745 | 7.0384  | -4.9418 |
| H | -7.7121 | 7.5519  | -6.2173 |
| H | -9.2586 | 6.7634  | -6.6764 |
| H | -2.8933 | 2.8125  | -1.9114 |
| N | -0.5103 | 12.4372 | -3.5517 |
| O | 0.6246  | 12.6501 | -3.1022 |
| O | -1.2741 | 13.3416 | -3.9173 |
| O | -4.9586 | -0.9048 | -3.3214 |
| C | -5.6865 | -1.6089 | -4.3257 |
| H | -5.9131 | -2.5883 | -3.8990 |
| H | -6.6249 | -1.0973 | -4.5763 |
| H | -5.0899 | -1.7415 | -5.2375 |

#### E-Piv-MeO-NO2

Energy (POTENTIAL) = -3567.4526439 Eh

| Atom | X       | Y       | Z       |
|------|---------|---------|---------|
| N    | -6.5288 | 0.3675  | -7.4945 |
| N    | -3.4322 | -1.2224 | -6.2153 |
| N    | -1.8322 | 1.0155  | -6.7508 |
| C    | -5.3581 | -0.4746 | -7.4228 |
| H    | -4.9336 | -0.6721 | -8.4154 |
| C    | -5.5802 | -1.8571 | -6.7606 |
| C    | -6.3824 | -2.8888 | -7.4474 |
| H    | -7.3288 | -2.5866 | -7.8765 |
| C    | -6.0153 | -4.1963 | -7.3867 |

|    |          |         |          |   |          |         |          |
|----|----------|---------|----------|---|----------|---------|----------|
| C  | -4.7879  | -4.5673 | -6.7160  | O | -7.8914  | -1.2946 | -5.0641  |
| C  | -3.9038  | -3.6491 | -6.2069  | O | -9.6512  | 1.2550  | -7.8171  |
| H  | -2.9683  | -3.9750 | -5.7676  | O | -11.6890 | 0.8195  | -6.9366  |
| C  | -4.2181  | -2.2720 | -6.3582  | O | -11.0504 | -2.0268 | -6.8438  |
| C  | -2.0466  | -1.2217 | -5.7321  | O | -9.0851  | -1.5374 | -7.8483  |
| H  | -2.0404  | -0.8671 | -4.6969  | O | -10.5676 | 1.2147  | -4.3287  |
| H  | -1.6537  | -2.2387 | -5.7612  | O | -8.4861  | 1.5645  | -5.1476  |
| C  | -1.2040  | -0.2934 | -6.6112  | C | -8.6608  | -1.8101 | -4.1875  |
| H  | -1.1187  | -0.7264 | -7.6145  | C | -9.4841  | 1.8760  | -4.4219  |
| H  | -0.1961  | -0.2071 | -6.2048  | C | -10.9108 | 1.4084  | -7.7544  |
| C  | -1.5079  | 2.0810  | -5.9300  | C | -10.1747 | -2.1920 | -7.7492  |
| C  | -0.6708  | 1.9244  | -4.7957  | C | -9.3594  | 3.1340  | -3.5499  |
| H  | -0.3139  | 0.9441  | -4.5049  | C | -11.5315 | 2.4452  | -8.6992  |
| C  | -0.3328  | 3.0068  | -4.0009  | C | -10.4619 | -3.2819 | -8.7926  |
| H  | 0.2886   | 2.8697  | -3.1241  | C | -8.0090  | -2.6362 | -3.0709  |
| C  | -0.8190  | 4.2797  | -4.3147  | C | -12.9300 | 1.9830  | -9.1420  |
| C  | -1.6436  | 4.4674  | -5.4328  | H | -13.5946 | 1.8444  | -8.2845  |
| H  | -2.0057  | 5.4593  | -5.6746  | H | -13.3747 | 2.7314  | -9.8085  |
| C  | -1.9799  | 3.3880  | -6.2255  | H | -12.8752 | 1.0327  | -9.6871  |
| H  | -2.6030  | 3.5572  | -7.0952  | C | -10.6291 | 2.6686  | -9.9235  |
| C  | -3.1332  | 0.8962  | -7.4109  | H | -11.0586 | 3.4524  | -10.5591 |
| H  | -3.5636  | 1.8622  | -7.6471  | H | -9.6204  | 2.9650  | -9.6241  |
| H  | -2.9857  | 0.3826  | -8.3645  | H | -10.5490 | 1.7542  | -10.5233 |
| C  | -4.1252  | 0.0615  | -6.5524  | C | -11.6369 | 3.7512  | -7.8773  |
| C  | -4.5261  | 0.7951  | -5.2717  | H | -10.6456 | 4.0906  | -7.5548  |
| C  | -4.4924  | 0.1681  | -4.0182  | H | -12.0879 | 4.5420  | -8.4884  |
| H  | -4.2581  | -0.8880 | -3.9388  | H | -12.2593 | 3.6055  | -6.9874  |
| C  | -4.7314  | 0.8886  | -2.8453  | C | -9.4483  | -3.2368 | -9.9464  |
| H  | -4.6821  | 0.3812  | -1.8857  | H | -8.4367  | -3.4747 | -9.6062  |
| C  | -5.0064  | 2.2549  | -2.9081  | H | -9.7291  | -3.9772 | -10.7049 |
| H  | -5.1618  | 2.8267  | -1.9976  | H | -9.4288  | -2.2506 | -10.4222 |
| C  | -5.0946  | 2.8782  | -4.1551  | C | -10.3776 | -4.6444 | -8.0696  |
| H  | -5.3264  | 3.9369  | -4.2199  | H | -11.0952 | -4.6962 | -7.2444  |
| C  | -4.8783  | 2.1522  | -5.3254  | H | -10.6038 | -5.4528 | -8.7756  |
| H  | -4.9640  | 2.6575  | -6.2796  | H | -9.3700  | -4.8140 | -7.6730  |
| S  | -6.5564  | 1.3287  | -8.8160  | C | -11.8863 | -3.0580 | -9.3400  |
| O  | -7.1957  | 2.6210  | -8.4927  | H | -11.9675 | -2.0834 | -9.8378  |
| O  | -5.2087  | 1.4061  | -9.4530  | H | -12.1282 | -3.8353 | -10.0743 |
| H  | -4.5289  | -5.6172 | -6.6317  | H | -12.6289 | -3.0934 | -8.5379  |
| C  | -7.5942  | 0.4977  | -10.0425 | C | -8.6102  | 4.2284  | -4.3305  |
| H  | -7.1300  | -0.4636 | -10.2775 | H | -8.4737  | 5.1120  | -3.6954  |
| H  | -8.5891  | 0.3530  | -9.6275  | H | -7.6302  | 3.8804  | -4.6614  |
| H  | -7.6308  | 1.1233  | -10.9387 | H | -9.1780  | 4.5330  | -5.2181  |
| H  | -6.1281  | -1.6627 | -5.8161  | C | -10.7493 | 3.6461  | -3.1389  |
| Rh | -10.8543 | -0.4347 | -5.5251  | H | -11.2949 | 2.9022  | -2.5512  |
| Rh | -8.6563  | 0.0048  | -6.5075  | H | -10.6397 | 4.5529  | -2.5321  |
| O  | -9.9179  | -1.6480 | -4.1339  | H | -11.3554 | 3.8949  | -4.0174  |

|   |         |         |         |   |         |        |         |
|---|---------|---------|---------|---|---------|--------|---------|
| C | -8.5602 | 2.7206  | -2.2947 | H | -7.2398 | 9.1510 | 3.7748  |
| H | -7.5775 | 2.3302  | -2.5698 | H | -7.0863 | 8.4005 | 5.3416  |
| H | -8.4178 | 3.5879  | -1.6386 | C | -6.3279 | 6.0366 | 4.5673  |
| H | -9.0929 | 1.9472  | -1.7282 | C | -6.7455 | 4.7338 | 4.3440  |
| C | -7.7362 | -1.6449 | -1.9157 | H | -6.3097 | 4.0429 | 5.0541  |
| H | -7.2512 | -2.1680 | -1.0828 | C | -8.6320 | 6.2022 | 5.9105  |
| H | -7.0781 | -0.8324 | -2.2434 | H | -8.9375 | 5.2626 | 6.3564  |
| H | -8.6698 | -1.2045 | -1.5483 | H | -7.8325 | 6.7623 | 6.3667  |
| C | -8.9695 | -3.7430 | -2.6036 | C | -5.3939 | 6.2934 | 5.6978  |
| H | -9.1918 | -4.4428 | -3.4182 | C | -3.6323 | 7.6585 | 6.7039  |
| H | -8.5101 | -4.3083 | -1.7843 | H | -2.9673 | 8.5161 | 6.6376  |
| H | -9.9152 | -3.3258 | -2.2476 | C | -4.5250 | 7.4034 | 5.6615  |
| C | -6.6883 | -3.2566 | -3.5536 | H | -4.5359 | 8.0596 | 4.7971  |
| H | -6.2661 | -3.8895 | -2.7643 | C | -5.9688 | 7.3166 | 2.5011  |
| H | -6.8432 | -3.8758 | -4.4441 | C | -6.5002 | 8.1117 | 1.4746  |
| H | -5.9527 | -2.4866 | -3.7979 | H | -7.4705 | 8.5796 | 1.6012  |
| O | -6.8435 | -5.1142 | -7.9704 | C | -5.8247 | 8.2844 | 0.2627  |
| C | -6.5672 | -6.5073 | -7.8282 | H | -6.2775 | 8.9049 | -0.5027 |
| H | -7.3886 | -7.0207 | -8.3316 | C | -4.6022 | 7.6399 | 0.0389  |
| H | -5.6218 | -6.7859 | -8.3111 | C | -4.0667 | 6.8337 | 1.0538  |
| H | -6.5474 | -6.8103 | -6.7736 | C | -4.7314 | 6.6814 | 2.2653  |
| N | -0.4782 | 5.4036  | -3.4764 | H | -4.2906 | 6.0613 | 3.0385  |
| O | -0.9428 | 6.5166  | -3.7625 | C | -5.3532 | 5.4779 | 6.8505  |
| O | 0.2659  | 5.2120  | -2.5031 | H | -6.0325 | 4.6373 | 6.9397  |

**C-D-ts-Piv-MeO-NO2**

**Energy (POTENTIAL) = -3567.430497 Eh**

| Atom | X        | Y      | Z      |    |         |         |         |
|------|----------|--------|--------|----|---------|---------|---------|
| S    | -8.2733  | 4.5433 | 2.0907 | H  | -4.4549 | 5.7277  | 7.8857  |
| O    | -8.6852  | 5.9631 | 2.1216 | H  | -4.4473 | 5.0710  | 8.7522  |
| O    | -9.3315  | 3.5630 | 1.7946 | C  | -3.5844 | 6.8205  | 7.8207  |
| N    | -9.3589  | 6.7306 | 4.9712 | H  | -3.1159 | 6.3373  | 0.8813  |
| N    | -7.5572  | 4.0354 | 3.5056 | N  | -6.6379 | 7.1442  | 3.7265  |
| C    | -12.9912 | 5.0130 | 3.7699 | H  | -2.8884 | 7.0199  | 8.6308  |
| C    | -12.8985 | 6.3987 | 3.8920 | C  | -6.9910 | 4.3401  | 0.8463  |
| H    | -13.7579 | 7.0260 | 3.6916 | H  | -6.1476 | 4.9897  | 1.0793  |
| C    | -11.6852 | 6.9548 | 4.2817 | H  | -6.6964 | 3.2904  | 0.8596  |
| H    | -11.6039 | 8.0298 | 4.3916 | H  | -7.4256 | 4.6125  | -0.1197 |
| C    | -10.5916 | 6.1198 | 4.5448 | Rh | -7.3263 | 1.8259  | 3.8734  |
| C    | -10.6951 | 4.7317 | 4.4126 | Rh | -6.8255 | -0.4871 | 4.4502  |
| H    | -9.8338  | 4.0885 | 4.5478 | O  | -9.3410 | 1.3159  | 3.9570  |
| C    | -11.9052 | 4.1763 | 4.0201 | O  | -8.8533 | -0.8695 | 4.3056  |
| H    | -11.9968 | 3.1098 | 3.8801 | O  | -4.8206 | 0.0689  | 4.5675  |
| C    | -8.9417  | 8.0005 | 4.2904 | O  | -5.2887 | 2.1735  | 3.8801  |
| H    | -9.4530  | 8.8364 | 4.7796 | O  | -7.2455 | 1.2595  | 1.8851  |
| H    | -9.2896  | 7.9042 | 3.2647 | O  | -6.6803 | -0.8675 | 2.4154  |
| C    | -7.4249  | 8.2178 | 4.3134 | O  | -7.3828 | 2.2226  | 5.9131  |
|      |          |        |        | O  | -7.0512 | 0.0488  | 6.4452  |
|      |          |        |        | C  | -9.6621 | 0.0944  | 4.1190  |
|      |          |        |        | C  | -7.2575 | 1.2653  | 6.7461  |
|      |          |        |        | C  | -4.4921 | 1.2612  | 4.2794  |

|   |          |         |         |   |          |         |         |
|---|----------|---------|---------|---|----------|---------|---------|
| C | -7.0056  | 0.0445  | 1.5906  | H | -8.1965  | 3.1212  | 9.5323  |
| C | -7.3025  | 1.6284  | 8.2373  | H | -7.7799  | 3.7453  | 7.9260  |
| C | -3.0303  | 1.6902  | 4.4634  | C | -7.8620  | 0.4492  | 9.0508  |
| C | -7.2186  | -0.3726 | 0.1301  | H | -7.8767  | 0.7081  | 10.1160 |
| C | -11.1643 | -0.2226 | 4.1028  | H | -8.8869  | 0.2088  | 8.7442  |
| C | -3.0006  | 2.6235  | 5.6958  | H | -7.2508  | -0.4479 | 8.9215  |
| H | -1.9734  | 2.9548  | 5.8892  | N | -14.2641 | 4.4148  | 3.3566  |
| H | -3.6234  | 3.5078  | 5.5322  | O | -14.3309 | 3.1858  | 3.2867  |
| H | -3.3662  | 2.1068  | 6.5916  | O | -15.2054 | 5.1707  | 3.1056  |
| C | -2.5715  | 2.4644  | 3.2130  | O | -3.8645  | 7.7270  | -1.1109 |
| H | -1.5364  | 2.8015  | 3.3427  | C | -4.3533  | 8.5577  | -2.1575 |
| H | -2.6124  | 1.8310  | 2.3182  | H | -3.6146  | 8.4963  | -2.9603 |
| H | -3.2027  | 3.3402  | 3.0391  | H | -5.3241  | 8.2090  | -2.5352 |
| C | -2.1224  | 0.4748  | 4.6969  | H | -4.4468  | 9.6038  | -1.8348 |
| H | -1.0856  | 0.8090  | 4.8226  |   |          |         |         |
| H | -2.4159  | -0.0788 | 5.5943  |   |          |         |         |
| H | -2.1571  | -0.2175 | 3.8483  |   |          |         |         |
| C | -7.0294  | 0.8235  | -0.8159 |   |          |         |         |
| H | -7.2012  | 0.5052  | -1.8512 |   |          |         |         |
| H | -7.7301  | 1.6290  | -0.5816 |   |          |         |         |
| H | -6.0112  | 1.2247  | -0.7489 |   |          |         |         |
| C | -8.6847  | -0.8652 | 0.0618  |   |          |         |         |
| H | -8.9175  | -1.2051 | -0.9543 |   |          |         |         |
| H | -8.8523  | -1.6991 | 0.7529  |   |          |         |         |
| H | -9.3778  | -0.0570 | 0.3212  |   |          |         |         |
| C | -6.2588  | -1.5119 | -0.2493 |   |          |         |         |
| H | -5.2133  | -1.1903 | -0.1693 |   |          |         |         |
| H | -6.3976  | -2.3819 | 0.3984  |   |          |         |         |
| H | -6.4407  | -1.8197 | -1.2859 |   |          |         |         |
| C | -11.7891 | 0.4725  | 5.3323  |   |          |         |         |
| H | -12.8747 | 0.3188  | 5.3402  |   |          |         |         |
| H | -11.3791 | 0.0593  | 6.2626  |   |          |         |         |
| H | -11.5904 | 1.5471  | 5.3262  |   |          |         |         |
| C | -11.7617 | 0.3363  | 2.7954  |   |          |         |         |
| H | -11.3632 | -0.2050 | 1.9283  |   |          |         |         |
| H | -12.8516 | 0.2201  | 2.7982  |   |          |         |         |
| H | -11.5189 | 1.3935  | 2.6663  |   |          |         |         |
| C | -11.4129 | -1.7355 | 4.1837  |   |          |         |         |
| H | -12.4917 | -1.9315 | 4.1582  |   |          |         |         |
| H | -10.9494 | -2.2598 | 3.3413  |   |          |         |         |
| H | -11.0088 | -2.1595 | 5.1086  |   |          |         |         |
| C | -5.8412  | 1.9116  | 8.6583  |   |          |         |         |
| H | -5.8062  | 2.1914  | 9.7180  |   |          |         |         |
| H | -5.2155  | 1.0233  | 8.5173  |   |          |         |         |
| H | -5.4101  | 2.7298  | 8.0720  |   |          |         |         |
| C | -8.1716  | 2.8777  | 8.4635  |   |          |         |         |
| H | -9.2018  | 2.7062  | 8.1293  |   |          |         |         |

**3-MeO-NO2**

**Energy (POTENTIAL) = -1962.0257581 Eh**

| Atom | X       | Y       | Z       |
|------|---------|---------|---------|
| N    | -7.0551 | 5.2772  | -4.3760 |
| H    | -7.2003 | 5.2810  | -3.3714 |
| N    | -3.5361 | 4.2834  | -4.5337 |
| N    | -2.5732 | 6.8509  | -5.0158 |
| C    | -5.8173 | 4.7459  | -4.9083 |
| H    | -5.8669 | 4.8644  | -5.9966 |
| C    | -5.5917 | 3.2812  | -4.5840 |
| C    | -6.4962 | 2.2446  | -4.5075 |
| H    | -7.5617 | 2.4126  | -4.6354 |
| C    | -6.0176 | 0.9410  | -4.2551 |
| C    | -4.6455 | 0.7233  | -4.0917 |
| C    | -3.7289 | 1.7905  | -4.1621 |
| H    | -2.6702 | 1.6039  | -4.0101 |
| C    | -4.2112 | 3.0718  | -4.4108 |
| C    | -2.1221 | 4.5120  | -4.3144 |
| H    | -1.8927 | 4.7283  | -3.2599 |
| H    | -1.5667 | 3.6159  | -4.6073 |
| C    | -1.6957 | 5.6903  | -5.2003 |
| H    | -1.7832 | 5.3874  | -6.2510 |
| H    | -0.6567 | 5.9677  | -5.0226 |
| C    | -2.2244 | 7.9261  | -4.2252 |
| C    | -1.1003 | 7.8853  | -3.3584 |
| H    | -0.5253 | 6.9741  | -3.2505 |
| C    | -0.7476 | 8.9802  | -2.5895 |
| H    | 0.0990  | 8.9254  | -1.9157 |
| C    | -1.5034 | 10.1561 | -2.6593 |
| C    | -2.6148 | 10.2309 | -3.5107 |
| H    | -3.1832 | 11.1511 | -3.5727 |
| C    | -2.9667 | 9.1383  | -4.2780 |

|   |         |        |         |   |         |         |         |
|---|---------|--------|---------|---|---------|---------|---------|
| H | -3.8118 | 9.2296 | -4.9499 | O | -8.0439 | 5.6890  | -6.6539 |
| C | -3.9685 | 6.5327 | -5.3345 | O | -9.4547 | 5.9571  | -4.5391 |
| H | -4.5949 | 7.4181 | -5.2740 | H | -4.2653 | -0.2722 | -3.8935 |
| H | -4.0139 | 6.1633 | -6.3647 | C | -7.7412 | 7.8562  | -5.1744 |
| C | -4.4772 | 5.4123 | -4.3964 | H | -7.7354 | 8.1736  | -4.1298 |
| C | -4.6189 | 5.8882 | -2.9373 | H | -6.7618 | 7.9997  | -5.6341 |
| C | -4.2729 | 5.0468 | -1.8690 | H | -8.5018 | 8.4098  | -5.7322 |
| H | -3.8714 | 4.0595 | -2.0659 | N | -1.1398 | 11.2927 | -1.8511 |
| C | -4.4385 | 5.4578 | -0.5442 | O | -0.1482 | 11.2011 | -1.1119 |
| H | -4.1552 | 4.7873 | 0.2630  | O | -1.8328 | 12.3187 | -1.9269 |
| C | -4.9613 | 6.7200 | -0.2573 | O | -6.9794 | -0.0332 | -4.1896 |
| H | -5.0850 | 7.0426 | 0.7729  | C | -6.5587 | -1.3719 | -3.9593 |
| C | -5.3254 | 7.5628 | -1.3095 | H | -6.0514 | -1.4778 | -2.9905 |
| H | -5.7353 | 8.5483 | -1.1048 | H | -7.4684 | -1.9771 | -3.9544 |
| C | -5.1590 | 7.1480 | -2.6322 | H | -5.8917 | -1.7308 | -4.7552 |
| H | -5.4485 | 7.8258 | -3.4262 |   |         |         |         |
| S | -8.1811 | 6.1141 | -5.2535 |   |         |         |         |

## 15. References

- 1 (a) C. H. Yoder and J. J. Zuckerman, *Inorg. Chem.*, 1967, **6**, 103-107; (b) A. R. Katritzky, W. Fan and C. Fu, *J. Org. Chem.*, 1990, **55**, 3209-3213; (c) A. J. Arduengo, R. Krafczyk, R. Schmutzler, H. A. Craig, J. R. Goerlich, W. J. Marshall and M. Unverzagt, *Tetrahedron*, 1999, **55**, 14523-14534; (d) M. K. Denk, S. Gupta, J. Brownie, S. Tajammul and A. J. Lough, *Chem. Eur. J.*, 2001, **7**, 4477-4486.
- 2 L. S. Campbell-Verduyn, L. Mirfeizi, R. A. Dierckx, P. H. Elsinga and B. L. Feringa, *Chem. Commun.*, 2009, 2139-2141.
- 3 J. Raushel and V. V. Fokin, *Org. Lett.*, 2010, **12**, 4952-4955.
- 4 CrysAlisPro Software system, Agilent Technologies UK Ltd., Oxford, UK.
- 5 G. M. Sheldrick, *Acta Crystallogr. A*, 2008, **64**, 112-122.
- 6 M. C. Burla, R. Caliandro, M. Camalli, B. Carrozzini, G. L. Casciarano, L. De Caro, C. Giacovazzo, G. Polidori and R. Spagna, *J. Appl. Crystallogr.*, 2005, **38**, 381-388.
- 7 O. V. Dolomanov, L. J. Bourhis, R. J. Gildea, J. A. K. Howard and H. Puschmann, *J. Appl. Crystallogr.*, 2009, **42**, 339-341.
- 8 M. J. Frisch, G. W. Trucks, H. B. Schlegel, G. E. Scuseria, M. A. Robb, J. R. Cheeseman, G. Scalmani, V. Barone, B. Mennucci, G. A. Petersson, H. Nakatsuji, M. Caricato, X. Li, H. P. Hratchian, A. F. Izmaylov, J. Bloino, G. Zheng, J. L. Sonnenberg, M. Hada, M. Ehara, K. Toyota, R. Fukuda, J. Hasegawa, M. Ishida, T. Nakajima, Y. Honda, O. Kitao, H. Nakai, T. Vreven, J. A. Montgomery, J. E. Peralta, F. Ogliaro, M. Bearpark, J. J. Heyd, E. Brothers, K. N. Kudin, V. N. Staroverov, R. Kobayashi, J. Normand, K. Raghavachari, A. Rendell, J. C. Burant, S. S. Iyengar, J. Tomasi, M. Cossi, N. Rega, J. M. Millam, M. Klene, J. E. Knox, J. B. Cross, V. Bakken, C. Adamo, J. Jaramillo, R. Gomperts, R. E. Stratmann, O. Yazyev, A. J. Austin, R. Cammi, C. Pomelli, J. W. Ochterski, R. L. Martin, K. Morokuma, V. G. Zakrzewski, G. A. Voth, P. Salvador, J. J. Dannenberg, S. Dapprich, A. D. Daniels, Farkas, J. B. Foresman, J. V. Ortiz, J. Cioslowski and D. J. Fox, Revision D.01 ed., Gaussian, Inc., Wallingford, CT, **2009**.
- 9 (a) A. D. Becke, *J. Chem. Phys.*, 1993, **98**, 5648-5652; (b) C. Lee, W. Yang and R. G. Parr, *Phys. Rev. B*, 1988, **37**, 785-789; (c) P. J. Stephens, F. J. Devlin, C. F. Chabalowski and M. J. Frisch, *J. Phys. Chem.*, 1994, **98**, 11623-11627; (d) S. Grimme, J. Antony, S. Ehrlich and H. Krieg, *J. Chem. Phys.*, 2010, **132**, 154104.
- 10 (a) M. M. Francl, W. J. Pietro, W. J. Hehre, J. S. Binkley, M. S. Gordon, D. J. DeFrees and J. A. Pople, *J. Chem. Phys.*, 1982, **77**, 3654-3665; (b) P. C. Hariharan and J. A. Pople, *Theor. Chim. Acta*, 1973, **28**, 213-222; (c) W. J. Hehre, R. Ditchfield and J. A. Pople, *J. Chem. Phys.*, 1972, **56**, 2257-2261.
- 11 P. J. Hay and W. R. Wadt, *J. Chem. Phys.*, 1985, **82**, 270-283.
- 12 A. V. Marenich, C. J. Cramer and D. G. Truhlar, *J. Phys. Chem. B*, 2009, **113**, 6378-6396.
- 13 R. Krishnan, J. S. Binkley, R. Seeger and J. A. Pople, *J. Chem. Phys.*, 1980, **72**, 650-654.
- 14 L. E. Roy, P. J. Hay and R. L. Martin, *J. Chem. Theory Comput.*, 2008, **4**, 1029-1031.
